# Supplementary material
Source: publisher figshare collection journal article supplement (https://acs.figshare.com/ndownloader/files/4107337)
Supplement: Supplementary file 1 [file 4107337]

 
data_S-3a

_audit_creation_method           SHELXL-97
_audit_block_code                ga_ds26
_audit_block_refno               1122

_chemical_name_systematic        ?
_chemical_name_common            ?
_chemical_formula_moiety         ?
_chemical_formula_sum            'C10 H12 N4 O'
_chemical_melting_point          ?

_exptl_crystal_description       needle
_exptl_crystal_colour            colourless

_diffrn_ambient_temperature      100(2)
_chemical_formula_weight         204.24

loop_
_atom_type_symbol
_atom_type_description
_atom_type_scat_dispersion_real
_atom_type_scat_dispersion_imag
_atom_type_scat_source
C C 0.0033 0.0000 'International Tables Vol C Tables 4.2.6.8 and 6.1.1.4'
H H 0.0000 0.0000 'International Tables Vol C Tables 4.2.6.8 and 6.1.1.4'
N N 0.0061 0.0000 'International Tables Vol C Tables 4.2.6.8 and 6.1.1.4'
O O 0.0106 0.0000 'International Tables Vol C Tables 4.2.6.8 and 6.1.1.4'

_symmetry_cell_setting           orthorhombic
_symmetry_space_group_name_H-M   'P 21 21 21'
_symmetry_int_tables_number      19

_chemical_absolute_configuration syn

loop_
_symmetry_equiv_pos_as_xyz
'x, y, z'
'-x+1/2, -y, z+1/2'
'x+1/2, -y+1/2, -z'
'-x, y+1/2, -z+1/2'

_cell_length_a                   6.799(4)
_cell_length_b                   8.888(4)
_cell_length_c                   15.767(8)
_cell_angle_alpha                90.00
_cell_angle_beta                 90.00
_cell_angle_gamma                90.00
_cell_volume                     952.7(8)
_cell_formula_units_Z            4
_cell_measurement_temperature    100(2)
_cell_measurement_reflns_used    8150
_cell_measurement_theta_min      2.63
_cell_measurement_theta_max      31.71
_exptl_crystal_size_max          0.23
_exptl_crystal_size_mid          0.20
_exptl_crystal_size_min          0.12
_exptl_crystal_density_meas      ?
_exptl_crystal_density_diffrn    1.424
_exptl_crystal_density_method    'not measured'
_exptl_crystal_F_000             432
_exptl_absorpt_coefficient_mu    0.098

_exptl_absorpt_correction_type   multi-scan
_exptl_absorpt_correction_T_min  0.7671
_exptl_absorpt_correction_T_max  0.8623
_exptl_absorpt_process_details   
;
multi-scan from symmetry-related measurements (Blessing 1995)
SADABS (Sheldrick & Bruker AXS, 2004-2008)
;

_exptl_special_details           
; 
 ? 
;
_diffrn_radiation_probe          x-ray
_diffrn_radiation_type           MoK\a
_diffrn_radiation_wavelength     0.71073
_diffrn_source                   'fine-focus sealed tube'
_diffrn_radiation_monochromator  graphite
_diffrn_measurement_device_type  'Bruker AXS Smart 1000'
_diffrn_measurement_method       '\f- and \w-scans'
_diffrn_detector_area_resol_mean 8.19
_diffrn_reflns_number            20140
_diffrn_reflns_av_R_equivalents  0.0343
_diffrn_reflns_av_sigmaI/netI    0.0163
_diffrn_reflns_limit_h_min       -10
_diffrn_reflns_limit_h_max       10
_diffrn_reflns_limit_k_min       -13
_diffrn_reflns_limit_k_max       13
_diffrn_reflns_limit_l_min       -22
_diffrn_reflns_limit_l_max       22
_diffrn_reflns_theta_min         2.58
_diffrn_reflns_theta_max         32.17
_reflns_number_total             1862
_reflns_number_gt                1735
_reflns_threshold_expression     >2sigma(I)
_computing_data_collection       'SMART-5.631 (Bruker AXS, 2003)'

_computing_cell_refinement       
;
SAINT (Bruker AXS, 1997-2008). Includes estimated systematic errors
 of the unit cell constants from Monte Carlo simulations.
;
_computing_data_reduction        
'SAINT (Bruker AXS, 1997-2008); SADABS (Bruker AXS, 2008)'
_computing_structure_solution    'SUPERFLIP (Palatinus, 2007-2009)'
_computing_structure_refinement  'SHELXL-97 (Sheldrick, 1997)'
_computing_molecular_graphics    ?
_computing_publication_material  'SHELXL-97 (Sheldrick, 1997)'

_refine_special_details          
; 
 Refinement of F^2^ against ALL reflections.  The weighted R-factor wR and 
 goodness of fit S are based on F^2^, conventional R-factors R are based 
 on F, with F set to zero for negative F^2^. The threshold expression of 
 F^2^ > 2sigma(F^2^) is used only for calculating R-factors(gt) etc. and is 
 not relevant to the choice of reflections for refinement.  R-factors based 
 on F^2^ are statistically about twice as large as those based on F, and R- 
 factors based on ALL data will be even larger. 
;

_refine_ls_structure_factor_coef Fsqd
_refine_ls_matrix_type           full
_refine_ls_weighting_scheme      calc
_refine_ls_weighting_details     
'calc w=1/[\s^2^(Fo^2^)+(0.0629P)^2^+0.2093P] where P=(Fo^2^+2Fc^2^)/3'
_atom_sites_solution_primary     dual
_atom_sites_solution_secondary   difmap
_atom_sites_solution_hydrogens   difmap

_refine_ls_hydrogen_treatment    mixed
_refine_ls_extinction_method     none
_refine_ls_extinction_coef       ?
_refine_ls_abs_structure_details 'Flack H D (1983), Acta Cryst. A39, 876-881'
_refine_ls_abs_structure_Flack   .
_refine_ls_number_reflns         1862
_refine_ls_number_parameters     158
_refine_ls_number_restraints     0
_refine_ls_R_factor_all          0.0418
_refine_ls_R_factor_gt           0.0384
_refine_ls_wR_factor_ref         0.1072
_refine_ls_wR_factor_gt          0.1045
_refine_ls_goodness_of_fit_ref   1.099
_refine_ls_restrained_S_all      1.099
_refine_ls_shift/su_max          0.001
_refine_ls_shift/su_mean         0.000

loop_
_atom_site_label
_atom_site_type_symbol
_atom_site_fract_x
_atom_site_fract_y
_atom_site_fract_z
_atom_site_U_iso_or_equiv
_atom_site_adp_type
_atom_site_occupancy
_atom_site_symmetry_multiplicity
_atom_site_calc_flag
_atom_site_refinement_flags
_atom_site_disorder_assembly
_atom_site_disorder_group
C1 C -0.2653(2) -0.85029(15) -1.04013(8) 0.0143(2) Uani 1 1 d . . .
C2 C -0.2648(2) -0.92479(16) -0.96063(8) 0.0167(2) Uani 1 1 d . . .
H2 H -0.261(3) -1.036(2) -0.9583(11) 0.020 Uiso 1 1 d . . .
C3 C -0.2651(2) -0.84032(16) -0.88787(8) 0.0161(2) Uani 1 1 d . . .
C4 C -0.2663(2) -0.67974(15) -0.89511(8) 0.0149(2) Uani 1 1 d . . .
C5 C -0.2651(2) -0.60860(15) -0.97181(7) 0.0142(2) Uani 1 1 d . . .
C6 C -0.2608(2) -0.56513(17) -0.82480(8) 0.0194(3) Uani 1 1 d . . .
H6A H -0.363(3) -0.583(3) -0.7785(12) 0.023 Uiso 1 1 d . . .
H6B H -0.132(3) -0.576(3) -0.7976(13) 0.023 Uiso 1 1 d . . .
C7 C -0.3021(2) -0.41605(18) -0.87068(9) 0.0219(3) Uani 1 1 d . . .
H7B H -0.453(3) -0.401(3) -0.8688(12) 0.026 Uiso 1 1 d . . .
H7A H -0.235(3) -0.334(3) -0.8477(12) 0.026 Uiso 1 1 d . . .
C8 C -0.2518(2) -0.43940(15) -0.96529(8) 0.0167(2) Uani 1 1 d . . .
H8 H -0.124(3) -0.405(2) -0.9810(12) 0.020 Uiso 1 1 d . . .
C9 C -0.2619(3) -0.91152(18) -0.80174(9) 0.0232(3) Uani 1 1 d . . .
H9B H -0.272(2) -1.0178(14) -0.80739(12) 0.035 Uiso 1 1 calc R . .
H9C H -0.3695(19) -0.8748(14) -0.7692(6) 0.035 Uiso 1 1 calc R . .
H9A H -0.1418(19) -0.8872(14) -0.7740(5) 0.035 Uiso 1 1 calc R . .
C10 C -0.3110(3) -0.30415(17) -1.09466(10) 0.0237(3) Uani 1 1 d . . .
H10C H -0.269(2) -0.3848(11) -1.1268(6) 0.036 Uiso 1 1 calc R . .
H10A H -0.2064(19) -0.2404(15) -1.08462(16) 0.036 Uiso 1 1 calc R . .
H10B H -0.4081(15) -0.2529(15) -1.1236(6) 0.036 Uiso 1 1 calc R . .
N1 N -0.26302(17) -0.69642(13) -1.04339(6) 0.0133(2) Uani 1 1 d . . .
N2 N -0.26028(19) -0.65324(13) -1.12659(6) 0.0162(2) Uani 1 1 d . . .
N3 N -0.26114(19) -0.77911(14) -1.16986(7) 0.0182(2) Uani 1 1 d . . .
N4 N -0.26442(19) -0.90192(13) -1.11997(7) 0.0175(2) Uani 1 1 d . . .
O1 O -0.38726(17) -0.35722(13) -1.01578(7) 0.0209(2) Uani 1 1 d . . .

loop_
_atom_site_aniso_label
_atom_site_aniso_U_11
_atom_site_aniso_U_22
_atom_site_aniso_U_33
_atom_site_aniso_U_23
_atom_site_aniso_U_13
_atom_site_aniso_U_12
C1 0.0126(5) 0.0153(5) 0.0150(5) -0.0011(4) -0.0002(5) 0.0005(5)
C2 0.0144(5) 0.0183(5) 0.0173(5) 0.0025(4) -0.0002(5) 0.0006(5)
C3 0.0117(5) 0.0221(6) 0.0145(5) 0.0027(4) 0.0005(5) 0.0014(5)
C4 0.0123(5) 0.0200(6) 0.0123(5) -0.0005(4) 0.0002(5) 0.0006(5)
C5 0.0126(5) 0.0184(5) 0.0116(4) -0.0031(4) 0.0005(5) -0.0003(5)
C6 0.0197(6) 0.0265(6) 0.0118(5) -0.0041(4) 0.0005(5) 0.0019(6)
C7 0.0288(7) 0.0208(6) 0.0160(5) -0.0053(5) 0.0028(5) 0.0003(6)
C8 0.0172(5) 0.0174(5) 0.0154(5) -0.0027(4) 0.0017(5) -0.0009(5)
C9 0.0242(7) 0.0292(7) 0.0161(5) 0.0067(5) 0.0011(6) 0.0022(7)
C10 0.0319(7) 0.0181(6) 0.0210(6) 0.0035(5) 0.0073(6) 0.0024(6)
N1 0.0134(4) 0.0157(5) 0.0108(4) -0.0004(3) 0.0003(4) -0.0002(4)
N2 0.0198(5) 0.0182(5) 0.0106(4) -0.0004(4) -0.0001(5) -0.0003(5)
N3 0.0207(5) 0.0194(5) 0.0144(4) -0.0019(4) 0.0002(5) 0.0004(5)
N4 0.0196(5) 0.0180(5) 0.0150(4) -0.0022(4) -0.0007(5) 0.0013(5)
O1 0.0212(5) 0.0226(5) 0.0190(4) 0.0044(4) 0.0048(4) 0.0045(4)

_geom_special_details            
; 
 All esds (except the esd in the dihedral angle between two l.s. planes) 
 are estimated using the full covariance matrix.  The cell esds are taken 
 into account individually in the estimation of esds in distances, angles 
 and torsion angles; correlations between esds in cell parameters are only 
 used when they are defined by crystal symmetry.  An approximate (isotropic) 
 treatment of cell esds is used for estimating esds involving l.s. planes. 
;

loop_
_geom_bond_atom_site_label_1
_geom_bond_atom_site_label_2
_geom_bond_distance
_geom_bond_site_symmetry_2
_geom_bond_publ_flag
C1 N4 1.3398(16) . ?
C1 N1 1.3686(18) . ?
C1 C2 1.4177(18) . ?
C2 C3 1.3710(18) . ?
C2 H2 0.99(2) . ?
C3 C4 1.432(2) . ?
C3 C9 1.4984(19) . ?
C4 C5 1.3647(17) . ?
C4 C6 1.5060(19) . ?
C5 N1 1.3723(16) . ?
C5 C8 1.5099(19) . ?
C6 C7 1.535(2) . ?
C6 H6A 1.02(2) . ?
C6 H6B 0.98(2) . ?
C7 C8 1.544(2) . ?
C7 H7B 1.04(2) . ?
C7 H7A 0.93(2) . ?
C8 O1 1.4194(18) . ?
C8 H8 0.95(2) . ?
C9 H9B 0.9516 . ?
C9 H9C 0.9516 . ?
C9 H9A 0.9516 . ?
C10 O1 1.4277(19) . ?
C10 H10C 0.9226 . ?
C10 H10A 0.9226 . ?
C10 H10B 0.9226 . ?
N1 N2 1.3668(15) . ?
N2 N3 1.3104(16) . ?
N3 N4 1.3457(17) . ?

loop_
_geom_angle_atom_site_label_1
_geom_angle_atom_site_label_2
_geom_angle_atom_site_label_3
_geom_angle
_geom_angle_site_symmetry_1
_geom_angle_site_symmetry_3
_geom_angle_publ_flag
N4 C1 N1 107.87(11) . . ?
N4 C1 C2 132.12(13) . . ?
N1 C1 C2 119.99(11) . . ?
C3 C2 C1 118.95(13) . . ?
C3 C2 H2 121.1(11) . . ?
C1 C2 H2 120.0(11) . . ?
C2 C3 C4 118.63(12) . . ?
C2 C3 C9 121.81(13) . . ?
C4 C3 C9 119.56(12) . . ?
C5 C4 C3 122.17(12) . . ?
C5 C4 C6 109.80(12) . . ?
C3 C4 C6 127.98(12) . . ?
C4 C5 N1 117.73(12) . . ?
C4 C5 C8 113.68(11) . . ?
N1 C5 C8 128.45(11) . . ?
C4 C6 C7 103.44(11) . . ?
C4 C6 H6A 114.0(13) . . ?
C7 C6 H6A 110.1(13) . . ?
C4 C6 H6B 106.1(13) . . ?
C7 C6 H6B 116.9(14) . . ?
H6A C6 H6B 106.5(16) . . ?
C6 C7 C8 107.38(11) . . ?
C6 C7 H7B 106.3(13) . . ?
C8 C7 H7B 105.3(11) . . ?
C6 C7 H7A 113.6(13) . . ?
C8 C7 H7A 111.9(13) . . ?
H7B C7 H7A 111.9(19) . . ?
O1 C8 C5 115.83(11) . . ?
O1 C8 C7 109.21(12) . . ?
C5 C8 C7 100.74(11) . . ?
O1 C8 H8 106.2(12) . . ?
C5 C8 H8 111.0(13) . . ?
C7 C8 H8 114.1(12) . . ?
C3 C9 H9B 109.5 . . ?
C3 C9 H9C 109.5 . . ?
H9B C9 H9C 109.5 . . ?
C3 C9 H9A 109.5 . . ?
H9B C9 H9A 109.5 . . ?
H9C C9 H9A 109.5 . . ?
O1 C10 H10C 109.5 . . ?
O1 C10 H10A 109.5 . . ?
H10C C10 H10A 109.5 . . ?
O1 C10 H10B 109.5 . . ?
H10C C10 H10B 109.5 . . ?
H10A C10 H10B 109.5 . . ?
N2 N1 C1 108.46(10) . . ?
N2 N1 C5 129.03(12) . . ?
C1 N1 C5 122.50(11) . . ?
N3 N2 N1 105.07(11) . . ?
N2 N3 N4 112.84(11) . . ?
C1 N4 N3 105.75(11) . . ?
C8 O1 C10 115.02(12) . . ?

loop_
_geom_torsion_atom_site_label_1
_geom_torsion_atom_site_label_2
_geom_torsion_atom_site_label_3
_geom_torsion_atom_site_label_4
_geom_torsion
_geom_torsion_site_symmetry_1
_geom_torsion_site_symmetry_2
_geom_torsion_site_symmetry_3
_geom_torsion_site_symmetry_4
_geom_torsion_publ_flag
N4 C1 C2 C3 179.72(16) . . . . ?
N1 C1 C2 C3 0.9(2) . . . . ?
C1 C2 C3 C4 0.2(2) . . . . ?
C1 C2 C3 C9 -179.15(14) . . . . ?
C2 C3 C4 C5 -0.7(2) . . . . ?
C9 C3 C4 C5 178.60(13) . . . . ?
C2 C3 C4 C6 -178.03(13) . . . . ?
C9 C3 C4 C6 1.3(2) . . . . ?
C3 C4 C5 N1 0.16(19) . . . . ?
C6 C4 C5 N1 177.89(13) . . . . ?
C3 C4 C5 C8 -175.80(13) . . . . ?
C6 C4 C5 C8 1.93(16) . . . . ?
C5 C4 C6 C7 12.07(16) . . . . ?
C3 C4 C6 C7 -170.37(14) . . . . ?
C4 C6 C7 C8 -21.13(16) . . . . ?
C4 C5 C8 O1 -132.45(12) . . . . ?
N1 C5 C8 O1 52.12(19) . . . . ?
C4 C5 C8 C7 -14.81(16) . . . . ?
N1 C5 C8 C7 169.76(13) . . . . ?
C6 C7 C8 O1 143.93(12) . . . . ?
C6 C7 C8 C5 21.54(16) . . . . ?
N4 C1 N1 N2 -0.16(17) . . . . ?
C2 C1 N1 N2 178.89(12) . . . . ?
N4 C1 N1 C5 179.36(11) . . . . ?
C2 C1 N1 C5 -1.6(2) . . . . ?
C4 C5 N1 N2 -179.56(13) . . . . ?
C8 C5 N1 N2 -4.3(2) . . . . ?
C4 C5 N1 C1 1.02(19) . . . . ?
C8 C5 N1 C1 176.29(14) . . . . ?
C1 N1 N2 N3 0.07(16) . . . . ?
C5 N1 N2 N3 -179.41(13) . . . . ?
N1 N2 N3 N4 0.04(16) . . . . ?
N1 C1 N4 N3 0.18(16) . . . . ?
C2 C1 N4 N3 -178.71(15) . . . . ?
N2 N3 N4 C1 -0.14(16) . . . . ?
C5 C8 O1 C10 -97.55(15) . . . . ?
C7 C8 O1 C10 149.62(13) . . . . ?

_diffrn_measured_fraction_theta_max 0.961
_diffrn_reflns_theta_full        30.51
_diffrn_measured_fraction_theta_full 0.997
_refine_diff_density_max         0.536
_refine_diff_density_min         -0.212
_refine_diff_density_rms         0.057

_diffrn_ambient_environment      'perfluoro polyether oil'
_diffrn_measurement_device       'three-circle diffractometer'
_diffrn_measurement_specimen_support 'polyimid foil'
_diffrn_detector                 'CCD plate'
_diffrn_detector_type            CCD-PXL-KAF2


#==end==


data_RR-7

_audit_creation_method           SHELXL-97
_audit_block_code                ga_ds36
_audit_block_refno               1215

_chemical_name_systematic        ?
_chemical_name_common            ?
_chemical_formula_moiety         ?
_chemical_formula_sum            'C40 H53 N5 O2'
_chemical_melting_point          ?

_exptl_crystal_description       block
_exptl_crystal_colour            yellow

_diffrn_ambient_temperature      100(2)
_chemical_formula_weight         635.87

loop_
_atom_type_symbol
_atom_type_description
_atom_type_scat_dispersion_real
_atom_type_scat_dispersion_imag
_atom_type_scat_source
C C 0.0033 0.0000 'International Tables Vol C Tables 4.2.6.8 and 6.1.1.4'
H H 0.0000 0.0000 'International Tables Vol C Tables 4.2.6.8 and 6.1.1.4'
N N 0.0061 0.0000 'International Tables Vol C Tables 4.2.6.8 and 6.1.1.4'
O O 0.0106 0.0000 'International Tables Vol C Tables 4.2.6.8 and 6.1.1.4'

_symmetry_cell_setting           triclinic
_symmetry_space_group_name_H-M   'P 1'
_symmetry_int_tables_number      1

_chemical_absolute_configuration syn

loop_
_symmetry_equiv_pos_as_xyz
'x, y, z'

_cell_length_a                   8.265(4)
_cell_length_b                   12.523(7)
_cell_length_c                   18.640(9)
_cell_angle_alpha                95.869(9)
_cell_angle_beta                 99.529(8)
_cell_angle_gamma                107.303(13)
_cell_volume                     1792.9(15)
_cell_formula_units_Z            2
_cell_measurement_temperature    100(2)
_cell_measurement_reflns_used    8159
_cell_measurement_theta_min      2.20
_cell_measurement_theta_max      31.42
_exptl_crystal_size_max          0.25
_exptl_crystal_size_mid          0.20
_exptl_crystal_size_min          0.14
_exptl_crystal_density_meas      ?
_exptl_crystal_density_diffrn    1.178
_exptl_crystal_density_method    'not measured'
_exptl_crystal_F_000             688
_exptl_absorpt_coefficient_mu    0.073

_exptl_absorpt_correction_type   multi-scan
_exptl_absorpt_correction_T_min  0.7953
_exptl_absorpt_correction_T_max  0.8623
_exptl_absorpt_process_details
;
multi-scan from symmetry-related measurements (Blessing 1995)
SADABS (Sheldrick & Bruker AXS, 2004-2008)
;

_exptl_special_details
;
 ?
;
_diffrn_radiation_probe          x-ray
_diffrn_radiation_type           MoK\a
_diffrn_radiation_wavelength     0.71073
_diffrn_source                   'fine-focus sealed tube'
_diffrn_radiation_monochromator  graphite
_diffrn_measurement_device_type  'Bruker AXS Smart 1000'
_diffrn_measurement_method       '\f- and \w-scans'
_diffrn_detector_area_resol_mean 8.19
_diffrn_reflns_number            45236
_diffrn_reflns_av_R_equivalents  0.0409
_diffrn_reflns_av_sigmaI/netI    0.0418
_diffrn_reflns_limit_h_min       -12
_diffrn_reflns_limit_h_max       12
_diffrn_reflns_limit_k_min       -18
_diffrn_reflns_limit_k_max       18
_diffrn_reflns_limit_l_min       -27
_diffrn_reflns_limit_l_max       27
_diffrn_reflns_theta_min         2.20
_diffrn_reflns_theta_max         32.27
_reflns_number_total             11787
_reflns_number_gt                10190
_reflns_threshold_expression     >2sigma(I)
_computing_data_collection       'SMART-5.631 (Bruker AXS, 2003)'

_computing_cell_refinement
;
SAINT (Bruker AXS, 1997-2008). Includes estimated systematic errors
 of the unit cell constants from Monte Carlo simulations.
;
_computing_data_reduction        'SAINT (Bruker AXS, 1997-2008); SADABS (Bruker AXS, 2008)'
_computing_structure_solution    'SUPERFLIP (Palatinus, 2007-2009)'
_computing_structure_refinement  'SHELXL-97 (Sheldrick, 1997)'
_computing_molecular_graphics    ?
_computing_publication_material  'SHELXL-97 (Sheldrick, 1997)'

_refine_special_details
;
 Refinement of F^2^ against ALL reflections.  The weighted R-factor wR and
 goodness of fit S are based on F^2^, conventional R-factors R are based
 on F, with F set to zero for negative F^2^. The threshold expression of
 F^2^ > 2sigma(F^2^) is used only for calculating R-factors(gt) etc. and is
 not relevant to the choice of reflections for refinement.  R-factors based
 on F^2^ are statistically about twice as large as those based on F, and R-
 factors based on ALL data will be even larger.
;

_refine_ls_structure_factor_coef Fsqd
_refine_ls_matrix_type           full
_refine_ls_weighting_scheme      calc
_refine_ls_weighting_details
'calc w=1/[\s^2^(Fo^2^)+(0.0790P)^2^+0.0154P] where P=(Fo^2^+2Fc^2^)/3'
_atom_sites_solution_primary     dual
_atom_sites_solution_secondary   difmap
_atom_sites_solution_hydrogens   geom

_refine_ls_hydrogen_treatment    mixed
_refine_ls_extinction_method     none
_refine_ls_extinction_coef       ?
_refine_ls_abs_structure_details 'Flack H D (1983), Acta Cryst. A39, 876-881'
_refine_ls_abs_structure_Flack   .
_refine_ls_number_reflns         11787
_refine_ls_number_parameters     865
_refine_ls_number_restraints     3
_refine_ls_R_factor_all          0.0569
_refine_ls_R_factor_gt           0.0462
_refine_ls_wR_factor_ref         0.1208
_refine_ls_wR_factor_gt          0.1129
_refine_ls_goodness_of_fit_ref   1.027
_refine_ls_restrained_S_all      1.027
_refine_ls_shift/su_max          0.001
_refine_ls_shift/su_mean         0.000

loop_
_atom_site_label
_atom_site_type_symbol
_atom_site_fract_x
_atom_site_fract_y
_atom_site_fract_z
_atom_site_U_iso_or_equiv
_atom_site_adp_type
_atom_site_occupancy
_atom_site_symmetry_multiplicity
_atom_site_calc_flag
_atom_site_refinement_flags
_atom_site_disorder_assembly
_atom_site_disorder_group
O1 O -0.03234(18) 1.08458(13) 1.17540(8) 0.0218(3) Uani 1 1 d . . .
O2 O 0.1548(2) 0.70256(15) 1.16310(9) 0.0320(4) Uani 1 1 d . . .
O51 O 0.70871(19) 1.16101(14) 1.40700(8) 0.0246(3) Uani 1 1 d . . .
O52 O 1.3991(2) 1.25945(12) 1.46734(8) 0.0228(3) Uani 1 1 d . . .
N1 N 0.1672(2) 0.93790(13) 0.96441(8) 0.0154(3) Uani 1 1 d . . .
H1 H 0.146(3) 0.930(2) 1.0077(14) 0.018 Uiso 1 1 d . . .
N2 N 0.4125(2) 1.11153(14) 0.99920(8) 0.0157(3) Uani 1 1 d . . .
N3 N 0.2654(2) 1.08098(14) 1.09968(8) 0.0162(3) Uani 1 1 d . . .
N4 N -0.0400(2) 0.76735(14) 0.88804(9) 0.0154(3) Uani 1 1 d . . .
N5 N -0.0305(2) 0.76084(14) 1.01685(9) 0.0174(3) Uani 1 1 d . . .
N51 N 1.0390(2) 1.13660(14) 1.66202(8) 0.0149(3) Uani 1 1 d . . .
H51 H 1.050(3) 1.151(2) 1.6239(15) 0.018 Uiso 1 1 d . . .
N52 N 0.8205(2) 0.95149(14) 1.62751(8) 0.0178(3) Uani 1 1 d . . .
N53 N 0.8347(2) 1.03028(14) 1.51677(8) 0.0175(3) Uani 1 1 d . . .
N54 N 1.2371(2) 1.30910(14) 1.74070(8) 0.0159(3) Uani 1 1 d . . .
N55 N 1.2551(2) 1.31106(14) 1.61378(8) 0.0155(3) Uani 1 1 d . . .
C1 C 0.0826(2) 0.86225(15) 0.89953(9) 0.0137(3) Uani 1 1 d . . .
C2 C 0.1665(2) 0.91159(15) 0.84134(9) 0.0132(3) Uani 1 1 d . . .
C3 C 0.2970(2) 1.01198(15) 0.87328(9) 0.0133(3) Uani 1 1 d . . .
C4 C 0.2994(2) 1.02898(16) 0.95258(9) 0.0145(3) Uani 1 1 d . . .
C5 C 0.1377(2) 0.87161(15) 0.76680(9) 0.0136(3) Uani 1 1 d . . .
H5 H 0.0484 0.8027 0.7453 0.016 Uiso 1 1 calc R . .
C6 C 0.2409(2) 0.93353(15) 0.72394(9) 0.0139(3) Uani 1 1 d . . .
C7 C 0.3714(2) 1.03836(15) 0.75579(9) 0.0133(3) Uani 1 1 d . . .
C8 C 0.3998(2) 1.07676(15) 0.83143(9) 0.0136(3) Uani 1 1 d . . .
H8 H 0.4878 1.1459 0.8537 0.016 Uiso 1 1 calc R . .
C9 C 0.4103(2) 1.12791(16) 1.07438(9) 0.0161(3) Uani 1 1 d . . .
C10 C 0.5650(2) 1.19967(17) 1.12001(10) 0.0182(3) Uani 1 1 d . . .
H10 H 0.6638 1.2289 1.0995 0.022 Uiso 1 1 calc R . .
C11 C 0.5749(2) 1.22841(17) 1.19491(10) 0.0189(4) Uani 1 1 d . . .
C12 C 0.4229(3) 1.18470(17) 1.22057(10) 0.0182(3) Uani 1 1 d . . .
C13 C 0.2761(2) 1.11272(15) 1.17184(9) 0.0155(3) Uani 1 1 d . . .
C14 C 0.3894(3) 1.20241(19) 1.29696(10) 0.0224(4) Uani 1 1 d . . .
H14A H 0.4313 1.2839 1.3182 0.027 Uiso 1 1 calc R . .
H14B H 0.4466 1.1612 1.3299 0.027 Uiso 1 1 calc R . .
C15 C 0.1914(3) 1.15376(19) 1.28545(10) 0.0224(4) Uani 1 1 d . . .
H15A H 0.1585 1.1117 1.3258 0.027 Uiso 1 1 calc R . .
H15B H 0.1397 1.2156 1.2849 0.027 Uiso 1 1 calc R . .
C16 C 0.1272(2) 1.07389(17) 1.21114(10) 0.0180(3) Uani 1 1 d . . .
H16 H 0.1098 0.9939 1.2192 0.022 Uiso 1 1 calc R . .
C17 C 0.7383(3) 1.3054(2) 1.24535(11) 0.0277(4) Uani 1 1 d . . .
H17A H 0.7241 1.3790 1.2599 0.041 Uiso 1 1 calc R . .
H17B H 0.8349 1.3160 1.2197 0.041 Uiso 1 1 calc R . .
H17C H 0.7626 1.2715 1.2893 0.041 Uiso 1 1 calc R . .
C18 C -0.1439(3) 0.9855(2) 1.12675(11) 0.0261(4) Uani 1 1 d . . .
H18A H -0.0803 0.9608 1.0920 0.039 Uiso 1 1 calc R . .
H18B H -0.2429 1.0025 1.0994 0.039 Uiso 1 1 calc R . .
H18C H -0.1855 0.9252 1.1553 0.039 Uiso 1 1 calc R . .
C19 C -0.1018(2) 0.71541(16) 0.94567(10) 0.0159(3) Uani 1 1 d . . .
C20 C -0.2331(2) 0.60947(17) 0.92447(11) 0.0193(4) Uani 1 1 d . . .
H20 H -0.2824 0.5822 0.8737 0.023 Uiso 1 1 calc R . .
C21 C -0.2913(3) 0.54444(17) 0.97676(12) 0.0218(4) Uani 1 1 d . . .
C22 C -0.2124(3) 0.59028(18) 1.05013(12) 0.0224(4) Uani 1 1 d . . .
C23 C -0.0860(3) 0.69606(17) 1.06640(11) 0.0202(4) Uani 1 1 d . . .
C24 C -0.2360(3) 0.54087(19) 1.11979(12) 0.0285(5) Uani 1 1 d . . .
H24A H -0.1851 0.4789 1.1235 0.034 Uiso 1 1 calc R . .
H24B H -0.3601 0.5116 1.1219 0.034 Uiso 1 1 calc R . .
C25 C -0.1380(4) 0.6427(2) 1.18105(13) 0.0340(5) Uani 1 1 d . . .
H25A H -0.2193 0.6791 1.1979 0.041 Uiso 1 1 calc R . .
H25B H -0.0789 0.6179 1.2237 0.041 Uiso 1 1 calc R . .
C26 C -0.0058(3) 0.72547(18) 1.14785(11) 0.0258(4) Uani 1 1 d . . .
H26 H 0.0085 0.8059 1.1674 0.031 Uiso 1 1 calc R . .
C27 C -0.4270(3) 0.4296(2) 0.95482(14) 0.0326(5) Uani 1 1 d . . .
H27A H -0.4796 0.4187 0.9024 0.049 Uiso 1 1 calc R . .
H27B H -0.5166 0.4244 0.9841 0.049 Uiso 1 1 calc R . .
H27C H -0.3734 0.3709 0.9638 0.049 Uiso 1 1 calc R . .
C28 C 0.2951(3) 0.7854(2) 1.14472(13) 0.0355(5) Uani 1 1 d . . .
H28A H 0.2693 0.7885 1.0919 0.053 Uiso 1 1 calc R . .
H28B H 0.4010 0.7651 1.1568 0.053 Uiso 1 1 calc R . .
H28C H 0.3116 0.8597 1.1728 0.053 Uiso 1 1 calc R . .
C29 C 0.2140(2) 0.88548(16) 0.64366(9) 0.0156(3) Uani 1 1 d . . .
H29A H 0.2260 0.9478 0.6142 0.019 Uiso 1 1 calc R . .
H29B H 0.0948 0.8320 0.6270 0.019 Uiso 1 1 calc R . .
C30 C 0.3435(2) 0.82357(16) 0.62924(10) 0.0172(3) Uani 1 1 d . . .
H30A H 0.4616 0.8792 0.6405 0.021 Uiso 1 1 calc R . .
H30B H 0.3412 0.7673 0.6630 0.021 Uiso 1 1 calc R . .
C31 C 0.3052(3) 0.76310(17) 0.55003(10) 0.0224(4) Uani 1 1 d . . .
H31A H 0.3899 0.7224 0.5455 0.027 Uiso 1 1 calc R . .
H31B H 0.1886 0.7057 0.5396 0.027 Uiso 1 1 calc R . .
C32 C 0.3118(3) 0.84051(18) 0.49197(10) 0.0226(4) Uani 1 1 d . . .
H32A H 0.4215 0.9046 0.5060 0.027 Uiso 1 1 calc R . .
H32B H 0.2151 0.8721 0.4907 0.027 Uiso 1 1 calc R . .
C33 C 0.2997(3) 0.7792(2) 0.41509(12) 0.0310(5) Uani 1 1 d . . .
H33A H 0.4045 0.7564 0.4147 0.037 Uiso 1 1 calc R . .
H33B H 0.1981 0.7095 0.4037 0.037 Uiso 1 1 calc R . .
C34 C 0.2832(4) 0.8521(3) 0.35568(13) 0.0436(7) Uani 1 1 d . . .
H34A H 0.2802 0.8102 0.3078 0.065 Uiso 1 1 calc R . .
H34B H 0.3826 0.9218 0.3671 0.065 Uiso 1 1 calc R . .
H34C H 0.1761 0.8712 0.3538 0.065 Uiso 1 1 calc R . .
C35 C 0.4724(2) 1.10684(16) 0.70660(9) 0.0153(3) Uani 1 1 d . . .
H35A H 0.3888 1.1231 0.6682 0.018 Uiso 1 1 calc R . .
H35B H 0.5283 1.0587 0.6812 0.018 Uiso 1 1 calc R . .
C36 C 0.6117(2) 1.21889(15) 0.74186(10) 0.0148(3) Uani 1 1 d . . .
H36A H 0.7008 1.2050 0.7788 0.018 Uiso 1 1 calc R . .
H36B H 0.5594 1.2693 0.7674 0.018 Uiso 1 1 calc R . .
C37 C 0.6956(2) 1.27587(15) 0.68246(10) 0.0161(3) Uani 1 1 d . . .
H37A H 0.7436 1.2234 0.6563 0.019 Uiso 1 1 calc R . .
H37B H 0.6051 1.2894 0.6461 0.019 Uiso 1 1 calc R . .
C38 C 0.8391(2) 1.38752(16) 0.71185(11) 0.0186(4) Uani 1 1 d . . .
H38A H 0.9308 1.3744 0.7479 0.022 Uiso 1 1 calc R . .
H38B H 0.7919 1.4405 0.7380 0.022 Uiso 1 1 calc R . .
C39 C 0.9187(3) 1.44168(18) 0.65079(13) 0.0246(4) Uani 1 1 d . . .
H39A H 0.9662 1.3888 0.6248 0.029 Uiso 1 1 calc R . .
H39B H 0.8268 1.4544 0.6146 0.029 Uiso 1 1 calc R . .
C40 C 1.0623(3) 1.5540(2) 0.67990(17) 0.0359(6) Uani 1 1 d . . .
H40A H 1.1114 1.5842 0.6389 0.054 Uiso 1 1 calc R . .
H40B H 1.1532 1.5421 0.7161 0.054 Uiso 1 1 calc R . .
H40C H 1.0147 1.6081 0.7034 0.054 Uiso 1 1 calc R . .
C51 C 1.1178(2) 1.21175(16) 1.72774(9) 0.0141(3) Uani 1 1 d . . .
C52 C 1.0338(2) 1.15993(16) 1.78481(10) 0.0142(3) Uani 1 1 d . . .
C53 C 0.9092(2) 1.05773(16) 1.75208(9) 0.0139(3) Uani 1 1 d . . .
C54 C 0.9130(2) 1.04064(16) 1.67305(9) 0.0143(3) Uani 1 1 d . . .
C55 C 1.0589(2) 1.19981(15) 1.85951(10) 0.0152(3) Uani 1 1 d . . .
H55 H 1.1460 1.2694 1.8816 0.018 Uiso 1 1 calc R . .
C56 C 0.9541(2) 1.13591(15) 1.90132(9) 0.0139(3) Uani 1 1 d . . .
C57 C 0.8274(2) 1.02959(15) 1.86764(10) 0.0142(3) Uani 1 1 d . . .
C58 C 0.8066(2) 0.99076(16) 1.79275(10) 0.0148(3) Uani 1 1 d . . .
H58 H 0.7237 0.9198 1.7701 0.018 Uiso 1 1 calc R . .
C59 C 0.8241(2) 0.94057(17) 1.55223(10) 0.0168(3) Uani 1 1 d . . .
C60 C 0.8084(2) 0.83287(17) 1.51626(10) 0.0188(3) Uani 1 1 d . . .
H60 H 0.8018 0.7725 1.5438 0.023 Uiso 1 1 calc R . .
C61 C 0.8025(2) 0.81328(17) 1.44111(10) 0.0201(4) Uani 1 1 d . . .
C62 C 0.8026(2) 0.90380(18) 1.40373(10) 0.0196(4) Uani 1 1 d . . .
C63 C 0.8188(2) 1.00835(17) 1.44354(10) 0.0179(3) Uani 1 1 d . . .
C64 C 0.7847(3) 0.91040(19) 1.32249(10) 0.0252(4) Uani 1 1 d . . .
H64A H 0.6894 0.8448 1.2927 0.030 Uiso 1 1 calc R . .
H64B H 0.8936 0.9131 1.3061 0.030 Uiso 1 1 calc R . .
C65 C 0.7438(3) 1.02190(19) 1.31641(10) 0.0245(4) Uani 1 1 d . . .
H65A H 0.7997 1.0608 1.2789 0.029 Uiso 1 1 calc R . .
H65B H 0.6173 1.0067 1.3022 0.029 Uiso 1 1 calc R . .
C66 C 0.8162(3) 1.09499(18) 1.39295(10) 0.0202(4) Uani 1 1 d . . .
H66 H 0.9368 1.1456 1.3955 0.024 Uiso 1 1 calc R . .
C67 C 0.7946(3) 0.69989(19) 1.40232(12) 0.0285(4) Uani 1 1 d . . .
H67A H 0.8300 0.6556 1.4387 0.043 Uiso 1 1 calc R . .
H67B H 0.8727 0.7110 1.3675 0.043 Uiso 1 1 calc R . .
H67C H 0.6758 0.6592 1.3755 0.043 Uiso 1 1 calc R . .
C68 C 0.7924(3) 1.2582(2) 1.46252(13) 0.0304(5) Uani 1 1 d . . .
H68A H 0.8866 1.3107 1.4454 0.046 Uiso 1 1 calc R . .
H68B H 0.8398 1.2347 1.5077 0.046 Uiso 1 1 calc R . .
H68C H 0.7084 1.2960 1.4725 0.046 Uiso 1 1 calc R . .
C69 C 1.3088(2) 1.36046(16) 1.68529(10) 0.0152(3) Uani 1 1 d . . .
C70 C 1.4384(2) 1.46633(16) 1.70847(10) 0.0162(3) Uani 1 1 d . . .
H70 H 1.4735 1.4966 1.7595 0.019 Uiso 1 1 calc R . .
C71 C 1.5162(2) 1.52763(16) 1.65818(10) 0.0163(3) Uani 1 1 d . . .
C72 C 1.4593(2) 1.47643(16) 1.58456(10) 0.0157(3) Uani 1 1 d . . .
C73 C 1.3322(2) 1.37055(16) 1.56609(10) 0.0154(3) Uani 1 1 d . . .
C74 C 1.5141(3) 1.51690(17) 1.51626(11) 0.0201(4) Uani 1 1 d . . .
H74A H 1.6264 1.5070 1.5114 0.024 Uiso 1 1 calc R . .
H74B H 1.5231 1.5976 1.5165 0.024 Uiso 1 1 calc R . .
C75 C 1.3653(3) 1.43897(18) 1.45397(11) 0.0221(4) Uani 1 1 d . . .
H75A H 1.2729 1.4737 1.4424 0.026 Uiso 1 1 calc R . .
H75B H 1.4087 1.4247 1.4087 0.026 Uiso 1 1 calc R . .
C76 C 1.2971(3) 1.32892(17) 1.48428(10) 0.0190(3) Uani 1 1 d . . .
H76 H 1.1710 1.2899 1.4636 0.023 Uiso 1 1 calc R . .
C77 C 1.6526(3) 1.64225(17) 1.68167(12) 0.0219(4) Uani 1 1 d . . .
H77A H 1.6042 1.7008 1.6661 0.033 Uiso 1 1 calc R . .
H77B H 1.7516 1.6440 1.6587 0.033 Uiso 1 1 calc R . .
H77C H 1.6907 1.6566 1.7354 0.033 Uiso 1 1 calc R . .
C78 C 1.3454(3) 1.15019(17) 1.48813(11) 0.0248(4) Uani 1 1 d . . .
H78A H 1.2230 1.1117 1.4656 0.037 Uiso 1 1 calc R . .
H78B H 1.3610 1.1580 1.5419 0.037 Uiso 1 1 calc R . .
H78C H 1.4152 1.1056 1.4712 0.037 Uiso 1 1 calc R . .
C79 C 0.9665(3) 1.17820(17) 1.98138(10) 0.0181(3) Uani 1 1 d . . .
H79A H 0.9762 1.1170 2.0098 0.022 Uiso 1 1 calc R . .
H79B H 0.8564 1.1917 1.9862 0.022 Uiso 1 1 calc R . .
C80 C 1.1151(3) 1.28579(16) 2.01747(10) 0.0177(3) Uani 1 1 d . . .
H80A H 1.2264 1.2700 2.0212 0.021 Uiso 1 1 calc R . .
H80B H 1.1172 1.3454 1.9862 0.021 Uiso 1 1 calc R . .
C81 C 1.0958(3) 1.32843(17) 2.09405(10) 0.0197(4) Uani 1 1 d . . .
H81A H 0.9967 1.3580 2.0891 0.024 Uiso 1 1 calc R . .
H81B H 1.0687 1.2638 2.1214 0.024 Uiso 1 1 calc R . .
C82 C 1.2560(3) 1.42078(17) 2.13871(10) 0.0213(4) Uani 1 1 d . . .
H82A H 1.2842 1.4851 2.1111 0.026 Uiso 1 1 calc R . .
H82B H 1.3549 1.3909 2.1444 0.026 Uiso 1 1 calc R . .
C83 C 1.2342(3) 1.46383(19) 2.21471(11) 0.0259(4) Uani 1 1 d . . .
H83A H 1.1988 1.3988 2.2412 0.031 Uiso 1 1 calc R . .
H83B H 1.1403 1.4982 2.2090 0.031 Uiso 1 1 calc R . .
C84 C 1.3988(3) 1.5511(2) 2.26097(13) 0.0345(5) Uani 1 1 d . . .
H84A H 1.4354 1.6155 2.2349 0.052 Uiso 1 1 calc R . .
H84B H 1.4907 1.5164 2.2693 0.052 Uiso 1 1 calc R . .
H84C H 1.3763 1.5776 2.3085 0.052 Uiso 1 1 calc R . .
C85 C 0.7204(2) 0.96012(16) 1.91481(10) 0.0150(3) Uani 1 1 d . . .
H85A H 0.6599 1.0070 1.9383 0.018 Uiso 1 1 calc R . .
H85B H 0.8002 0.9437 1.9547 0.018 Uiso 1 1 calc R . .
C86 C 0.5862(2) 0.84849(16) 1.87610(10) 0.0160(3) Uani 1 1 d . . .
H86A H 0.6443 0.8009 1.8518 0.019 Uiso 1 1 calc R . .
H86B H 0.5019 0.8636 1.8375 0.019 Uiso 1 1 calc R . .
C87 C 0.4898(2) 0.78423(16) 1.92960(10) 0.0167(3) Uani 1 1 d . . .
H87A H 0.5735 0.7662 1.9670 0.020 Uiso 1 1 calc R . .
H87B H 0.4359 0.8331 1.9555 0.020 Uiso 1 1 calc R . .
C88 C 0.3504(3) 0.67499(16) 1.89049(11) 0.0191(4) Uani 1 1 d . . .
H88A H 0.2703 0.6935 1.8518 0.023 Uiso 1 1 calc R . .
H88B H 0.4059 0.6259 1.8658 0.023 Uiso 1 1 calc R . .
C89 C 0.2456(3) 0.60885(17) 1.94056(12) 0.0214(4) Uani 1 1 d . . .
H89A H 0.2009 0.6597 1.9701 0.026 Uiso 1 1 calc R . .
H89B H 0.3214 0.5802 1.9750 0.026 Uiso 1 1 calc R . .
C90 C 0.0946(3) 0.50951(18) 1.89584(14) 0.0282(4) Uani 1 1 d . . .
H90A H 0.0218 0.5376 1.8605 0.042 Uiso 1 1 calc R . .
H90B H 0.0257 0.4704 1.9291 0.042 Uiso 1 1 calc R . .
H90C H 0.1392 0.4566 1.8692 0.042 Uiso 1 1 calc R . .

loop_
_atom_site_aniso_label
_atom_site_aniso_U_11
_atom_site_aniso_U_22
_atom_site_aniso_U_33
_atom_site_aniso_U_23
_atom_site_aniso_U_13
_atom_site_aniso_U_12
O1 0.0195(7) 0.0275(7) 0.0188(6) 0.0040(5) 0.0051(5) 0.0076(6)
O2 0.0401(9) 0.0324(9) 0.0234(7) 0.0105(6) 0.0029(6) 0.0115(7)
O51 0.0216(7) 0.0347(8) 0.0185(6) 0.0031(6) 0.0026(5) 0.0118(6)
O52 0.0314(8) 0.0189(7) 0.0217(7) 0.0042(5) 0.0144(6) 0.0084(6)
N1 0.0171(7) 0.0176(7) 0.0112(6) 0.0034(5) 0.0056(5) 0.0035(6)
N2 0.0178(7) 0.0189(8) 0.0091(6) 0.0014(5) 0.0047(5) 0.0034(6)
N3 0.0181(7) 0.0198(7) 0.0106(6) 0.0031(5) 0.0050(5) 0.0048(6)
N4 0.0154(7) 0.0167(7) 0.0145(7) 0.0048(5) 0.0045(5) 0.0040(6)
N5 0.0209(7) 0.0178(8) 0.0149(7) 0.0047(6) 0.0077(6) 0.0054(6)
N51 0.0158(7) 0.0186(8) 0.0099(6) 0.0030(6) 0.0040(5) 0.0037(6)
N52 0.0182(7) 0.0231(8) 0.0118(6) 0.0036(6) 0.0048(5) 0.0051(6)
N53 0.0169(7) 0.0224(8) 0.0115(6) 0.0022(6) 0.0030(5) 0.0040(6)
N54 0.0172(7) 0.0181(7) 0.0133(7) 0.0028(6) 0.0059(5) 0.0054(6)
N55 0.0151(7) 0.0183(7) 0.0135(7) 0.0023(6) 0.0041(5) 0.0055(6)
C1 0.0156(8) 0.0167(8) 0.0108(7) 0.0040(6) 0.0045(6) 0.0065(6)
C2 0.0138(8) 0.0159(8) 0.0111(7) 0.0042(6) 0.0047(6) 0.0046(6)
C3 0.0151(8) 0.0147(8) 0.0104(7) 0.0017(6) 0.0037(6) 0.0049(6)
C4 0.0170(8) 0.0165(8) 0.0117(7) 0.0034(6) 0.0049(6) 0.0063(7)
C5 0.0137(7) 0.0159(8) 0.0108(7) 0.0024(6) 0.0022(6) 0.0042(6)
C6 0.0161(8) 0.0159(8) 0.0103(7) 0.0014(6) 0.0028(6) 0.0063(7)
C7 0.0152(8) 0.0154(8) 0.0115(7) 0.0038(6) 0.0056(6) 0.0059(7)
C8 0.0147(8) 0.0138(8) 0.0114(7) 0.0014(6) 0.0030(6) 0.0033(6)
C9 0.0195(8) 0.0179(8) 0.0112(7) 0.0026(6) 0.0045(6) 0.0058(7)
C10 0.0179(8) 0.0207(9) 0.0144(7) 0.0022(6) 0.0050(6) 0.0032(7)
C11 0.0186(8) 0.0228(9) 0.0126(7) 0.0013(7) 0.0014(6) 0.0043(7)
C12 0.0209(9) 0.0222(9) 0.0118(7) 0.0022(6) 0.0037(6) 0.0074(7)
C13 0.0193(8) 0.0172(8) 0.0113(7) 0.0025(6) 0.0052(6) 0.0067(7)
C14 0.0227(9) 0.0316(11) 0.0110(7) -0.0002(7) 0.0039(7) 0.0067(8)
C15 0.0247(9) 0.0295(10) 0.0133(8) 0.0000(7) 0.0070(7) 0.0086(8)
C16 0.0192(8) 0.0235(9) 0.0126(7) 0.0031(6) 0.0057(6) 0.0073(7)
C17 0.0229(10) 0.0343(12) 0.0157(8) 0.0002(8) 0.0005(7) -0.0025(9)
C18 0.0241(10) 0.0328(11) 0.0184(9) 0.0030(8) 0.0040(7) 0.0052(9)
C19 0.0157(8) 0.0158(8) 0.0182(8) 0.0055(6) 0.0061(6) 0.0057(7)
C20 0.0160(8) 0.0190(9) 0.0218(9) 0.0040(7) 0.0041(7) 0.0035(7)
C21 0.0202(9) 0.0181(9) 0.0282(10) 0.0071(8) 0.0090(8) 0.0043(7)
C22 0.0276(10) 0.0212(9) 0.0237(9) 0.0103(8) 0.0148(8) 0.0082(8)
C23 0.0271(9) 0.0179(9) 0.0188(8) 0.0056(7) 0.0099(7) 0.0082(7)
C24 0.0387(12) 0.0241(10) 0.0274(10) 0.0128(8) 0.0180(9) 0.0080(9)
C25 0.0531(15) 0.0335(12) 0.0211(10) 0.0110(9) 0.0207(10) 0.0130(11)
C26 0.0402(12) 0.0219(10) 0.0172(8) 0.0059(7) 0.0114(8) 0.0087(9)
C27 0.0287(11) 0.0240(11) 0.0378(12) 0.0095(10) 0.0075(10) -0.0044(9)
C28 0.0357(13) 0.0432(14) 0.0242(10) 0.0091(10) 0.0016(9) 0.0091(11)
C29 0.0169(8) 0.0183(8) 0.0104(7) 0.0005(6) 0.0033(6) 0.0041(7)
C30 0.0210(8) 0.0176(8) 0.0139(7) 0.0012(6) 0.0051(6) 0.0070(7)
C31 0.0310(10) 0.0205(9) 0.0164(8) -0.0003(7) 0.0075(7) 0.0090(8)
C32 0.0263(10) 0.0260(10) 0.0146(8) -0.0001(7) 0.0075(7) 0.0065(8)
C33 0.0309(11) 0.0442(14) 0.0174(9) -0.0022(9) 0.0086(8) 0.0116(10)
C34 0.0459(15) 0.0644(18) 0.0163(9) 0.0048(11) 0.0114(9) 0.0095(14)
C35 0.0177(8) 0.0163(8) 0.0112(7) 0.0032(6) 0.0058(6) 0.0025(7)
C36 0.0158(8) 0.0144(8) 0.0140(7) 0.0028(6) 0.0050(6) 0.0033(6)
C37 0.0159(8) 0.0148(8) 0.0174(8) 0.0036(6) 0.0055(6) 0.0033(7)
C38 0.0165(8) 0.0151(8) 0.0243(9) 0.0040(7) 0.0055(7) 0.0041(7)
C39 0.0212(9) 0.0205(9) 0.0325(11) 0.0089(8) 0.0093(8) 0.0038(8)
C40 0.0235(10) 0.0219(11) 0.0594(17) 0.0119(11) 0.0115(11) -0.0004(9)
C51 0.0141(7) 0.0171(8) 0.0127(7) 0.0024(6) 0.0046(6) 0.0064(6)
C52 0.0152(8) 0.0170(8) 0.0126(7) 0.0039(6) 0.0043(6) 0.0069(7)
C53 0.0162(8) 0.0176(8) 0.0099(7) 0.0024(6) 0.0038(6) 0.0075(7)
C54 0.0145(8) 0.0178(8) 0.0113(7) 0.0031(6) 0.0036(6) 0.0055(7)
C55 0.0163(8) 0.0155(8) 0.0139(7) 0.0032(6) 0.0041(6) 0.0046(7)
C56 0.0154(8) 0.0168(8) 0.0110(7) 0.0018(6) 0.0035(6) 0.0068(7)
C57 0.0149(8) 0.0162(8) 0.0119(7) 0.0034(6) 0.0025(6) 0.0057(7)
C58 0.0147(8) 0.0181(8) 0.0124(7) 0.0028(6) 0.0035(6) 0.0060(7)
C59 0.0130(8) 0.0221(9) 0.0112(7) 0.0005(6) 0.0020(6) 0.0009(7)
C60 0.0180(8) 0.0216(9) 0.0135(7) 0.0015(6) 0.0026(6) 0.0023(7)
C61 0.0149(8) 0.0233(9) 0.0166(8) -0.0025(7) 0.0021(6) 0.0004(7)
C62 0.0170(8) 0.0262(10) 0.0118(7) 0.0003(7) 0.0031(6) 0.0021(7)
C63 0.0136(8) 0.0251(9) 0.0129(7) 0.0019(6) 0.0027(6) 0.0033(7)
C64 0.0264(10) 0.0321(11) 0.0120(8) -0.0004(7) 0.0047(7) 0.0029(8)
C65 0.0239(9) 0.0365(12) 0.0105(7) 0.0043(7) 0.0035(7) 0.0057(8)
C66 0.0186(8) 0.0285(10) 0.0133(8) 0.0053(7) 0.0043(6) 0.0062(7)
C67 0.0324(11) 0.0267(11) 0.0206(9) -0.0035(8) 0.0060(8) 0.0031(9)
C68 0.0317(11) 0.0338(12) 0.0271(10) 0.0031(9) 0.0044(9) 0.0141(10)
C69 0.0169(8) 0.0170(8) 0.0135(7) 0.0029(6) 0.0048(6) 0.0072(7)
C70 0.0173(8) 0.0162(8) 0.0151(8) 0.0025(6) 0.0047(6) 0.0048(7)
C71 0.0170(8) 0.0150(8) 0.0175(8) 0.0039(6) 0.0049(6) 0.0051(7)
C72 0.0159(8) 0.0158(8) 0.0172(8) 0.0046(6) 0.0072(6) 0.0048(7)
C73 0.0162(8) 0.0168(8) 0.0141(7) 0.0030(6) 0.0048(6) 0.0056(7)
C74 0.0248(9) 0.0186(9) 0.0198(8) 0.0067(7) 0.0100(7) 0.0072(7)
C75 0.0298(10) 0.0220(10) 0.0156(8) 0.0069(7) 0.0069(7) 0.0077(8)
C76 0.0208(9) 0.0226(9) 0.0128(7) 0.0030(7) 0.0046(6) 0.0053(7)
C77 0.0218(9) 0.0162(9) 0.0246(9) 0.0022(7) 0.0063(7) 0.0010(7)
C78 0.0359(11) 0.0198(9) 0.0190(9) 0.0040(7) 0.0083(8) 0.0076(8)
C79 0.0213(9) 0.0202(9) 0.0111(7) 0.0006(6) 0.0053(6) 0.0036(7)
C80 0.0222(8) 0.0192(8) 0.0109(7) 0.0010(6) 0.0047(6) 0.0052(7)
C81 0.0218(9) 0.0217(9) 0.0135(7) 0.0006(7) 0.0041(7) 0.0044(7)
C82 0.0250(9) 0.0194(9) 0.0158(8) 0.0006(7) 0.0033(7) 0.0027(8)
C83 0.0331(11) 0.0235(10) 0.0167(8) -0.0020(7) 0.0026(8) 0.0055(9)
C84 0.0400(13) 0.0287(11) 0.0248(10) -0.0036(9) -0.0025(9) 0.0040(10)
C85 0.0142(8) 0.0175(8) 0.0137(7) 0.0035(6) 0.0062(6) 0.0034(6)
C86 0.0165(8) 0.0174(8) 0.0146(7) 0.0034(6) 0.0049(6) 0.0050(7)
C87 0.0180(8) 0.0169(8) 0.0160(8) 0.0038(6) 0.0069(6) 0.0047(7)
C88 0.0187(8) 0.0173(8) 0.0206(8) 0.0039(7) 0.0049(7) 0.0039(7)
C89 0.0192(9) 0.0196(9) 0.0259(9) 0.0075(7) 0.0066(7) 0.0049(7)
C90 0.0217(10) 0.0195(10) 0.0413(12) 0.0068(9) 0.0059(9) 0.0031(8)

_geom_special_details
;
 All esds (except the esd in the dihedral angle between two l.s. planes)
 are estimated using the full covariance matrix.  The cell esds are taken
 into account individually in the estimation of esds in distances, angles
 and torsion angles; correlations between esds in cell parameters are only
 used when they are defined by crystal symmetry.  An approximate (isotropic)
 treatment of cell esds is used for estimating esds involving l.s. planes.
;

loop_
_geom_bond_atom_site_label_1
_geom_bond_atom_site_label_2
_geom_bond_distance
_geom_bond_site_symmetry_2
_geom_bond_publ_flag
O1 C18 1.423(3) . ?
O1 C16 1.426(2) . ?
O2 C28 1.424(3) . ?
O2 C26 1.430(3) . ?
O51 C66 1.418(3) . ?
O51 C68 1.427(3) . ?
O52 C78 1.422(3) . ?
O52 C76 1.426(2) . ?
N1 C4 1.390(2) . ?
N1 C1 1.393(2) . ?
N1 H1 0.86(3) . ?
N2 C4 1.292(2) . ?
N2 C9 1.399(2) . ?
N3 C13 1.344(2) . ?
N3 C9 1.352(2) . ?
N4 C1 1.283(2) . ?
N4 C19 1.402(2) . ?
N5 C23 1.339(2) . ?
N5 C19 1.349(2) . ?
N51 C51 1.395(2) . ?
N51 C54 1.396(2) . ?
N51 H51 0.76(3) . ?
N52 C54 1.279(2) . ?
N52 C59 1.402(2) . ?
N53 C63 1.341(2) . ?
N53 C59 1.349(3) . ?
N54 C51 1.290(3) . ?
N54 C69 1.394(2) . ?
N55 C73 1.338(2) . ?
N55 C69 1.352(2) . ?
C1 C2 1.473(2) . ?
C2 C5 1.384(2) . ?
C2 C3 1.388(3) . ?
C3 C8 1.388(2) . ?
C3 C4 1.468(2) . ?
C5 C6 1.388(2) . ?
C5 H5 0.9500 . ?
C6 C7 1.423(3) . ?
C6 C29 1.509(2) . ?
C7 C8 1.400(2) . ?
C7 C35 1.503(2) . ?
C8 H8 0.9500 . ?
C9 C10 1.402(3) . ?
C10 C11 1.388(2) . ?
C10 H10 0.9500 . ?
C11 C12 1.397(3) . ?
C11 C17 1.502(3) . ?
C12 C13 1.388(3) . ?
C12 C14 1.502(3) . ?
C13 C16 1.518(3) . ?
C14 C15 1.536(3) . ?
C14 H14A 0.9900 . ?
C14 H14B 0.9900 . ?
C15 C16 1.536(3) . ?
C15 H15A 0.9900 . ?
C15 H15B 0.9900 . ?
C16 H16 1.0000 . ?
C17 H17A 0.9800 . ?
C17 H17B 0.9800 . ?
C17 H17C 0.9800 . ?
C18 H18A 0.9800 . ?
C18 H18B 0.9800 . ?
C18 H18C 0.9800 . ?
C19 C20 1.410(3) . ?
C20 C21 1.389(3) . ?
C20 H20 0.9500 . ?
C21 C22 1.395(3) . ?
C21 C27 1.504(3) . ?
C22 C23 1.389(3) . ?
C22 C24 1.511(3) . ?
C23 C26 1.512(3) . ?
C24 C25 1.539(4) . ?
C24 H24A 0.9900 . ?
C24 H24B 0.9900 . ?
C25 C26 1.528(3) . ?
C25 H25A 0.9900 . ?
C25 H25B 0.9900 . ?
C26 H26 1.0000 . ?
C27 H27A 0.9800 . ?
C27 H27B 0.9800 . ?
C27 H27C 0.9800 . ?
C28 H28A 0.9800 . ?
C28 H28B 0.9800 . ?
C28 H28C 0.9800 . ?
C29 C30 1.538(3) . ?
C29 H29A 0.9900 . ?
C29 H29B 0.9900 . ?
C30 C31 1.526(3) . ?
C30 H30A 0.9900 . ?
C30 H30B 0.9900 . ?
C31 C32 1.522(3) . ?
C31 H31A 0.9900 . ?
C31 H31B 0.9900 . ?
C32 C33 1.528(3) . ?
C32 H32A 0.9900 . ?
C32 H32B 0.9900 . ?
C33 C34 1.519(4) . ?
C33 H33A 0.9900 . ?
C33 H33B 0.9900 . ?
C34 H34A 0.9800 . ?
C34 H34B 0.9800 . ?
C34 H34C 0.9800 . ?
C35 C36 1.525(3) . ?
C35 H35A 0.9900 . ?
C35 H35B 0.9900 . ?
C36 C37 1.529(3) . ?
C36 H36A 0.9900 . ?
C36 H36B 0.9900 . ?
C37 C38 1.518(3) . ?
C37 H37A 0.9900 . ?
C37 H37B 0.9900 . ?
C38 C39 1.526(3) . ?
C38 H38A 0.9900 . ?
C38 H38B 0.9900 . ?
C39 C40 1.523(3) . ?
C39 H39A 0.9900 . ?
C39 H39B 0.9900 . ?
C40 H40A 0.9800 . ?
C40 H40B 0.9800 . ?
C40 H40C 0.9800 . ?
C51 C52 1.467(2) . ?
C52 C53 1.385(3) . ?
C52 C55 1.390(2) . ?
C53 C58 1.385(3) . ?
C53 C54 1.474(2) . ?
C55 C56 1.392(3) . ?
C55 H55 0.9500 . ?
C56 C57 1.430(3) . ?
C56 C79 1.508(2) . ?
C57 C58 1.395(2) . ?
C57 C85 1.506(2) . ?
C58 H58 0.9500 . ?
C59 C60 1.403(3) . ?
C60 C61 1.387(3) . ?
C60 H60 0.9500 . ?
C61 C62 1.390(3) . ?
C61 C67 1.504(3) . ?
C62 C63 1.395(3) . ?
C62 C64 1.510(3) . ?
C63 C66 1.511(3) . ?
C64 C65 1.542(3) . ?
C64 H64A 0.9900 . ?
C64 H64B 0.9900 . ?
C65 C66 1.535(3) . ?
C65 H65A 0.9900 . ?
C65 H65B 0.9900 . ?
C66 H66 1.0000 . ?
C67 H67A 0.9800 . ?
C67 H67B 0.9800 . ?
C67 H67C 0.9800 . ?
C68 H68A 0.9800 . ?
C68 H68B 0.9800 . ?
C68 H68C 0.9800 . ?
C69 C70 1.406(3) . ?
C70 C71 1.391(3) . ?
C70 H70 0.9500 . ?
C71 C72 1.394(3) . ?
C71 C77 1.506(3) . ?
C72 C73 1.392(3) . ?
C72 C74 1.506(3) . ?
C73 C76 1.511(3) . ?
C74 C75 1.547(3) . ?
C74 H74A 0.9900 . ?
C74 H74B 0.9900 . ?
C75 C76 1.529(3) . ?
C75 H75A 0.9900 . ?
C75 H75B 0.9900 . ?
C76 H76 1.0000 . ?
C77 H77A 0.9800 . ?
C77 H77B 0.9800 . ?
C77 H77C 0.9800 . ?
C78 H78A 0.9800 . ?
C78 H78B 0.9800 . ?
C78 H78C 0.9800 . ?
C79 C80 1.527(3) . ?
C79 H79A 0.9900 . ?
C79 H79B 0.9900 . ?
C80 C81 1.522(3) . ?
C80 H80A 0.9900 . ?
C80 H80B 0.9900 . ?
C81 C82 1.520(3) . ?
C81 H81A 0.9900 . ?
C81 H81B 0.9900 . ?
C82 C83 1.522(3) . ?
C82 H82A 0.9900 . ?
C82 H82B 0.9900 . ?
C83 C84 1.524(3) . ?
C83 H83A 0.9900 . ?
C83 H83B 0.9900 . ?
C84 H84A 0.9800 . ?
C84 H84B 0.9800 . ?
C84 H84C 0.9800 . ?
C85 C86 1.521(3) . ?
C85 H85A 0.9900 . ?
C85 H85B 0.9900 . ?
C86 C87 1.524(3) . ?
C86 H86A 0.9900 . ?
C86 H86B 0.9900 . ?
C87 C88 1.520(3) . ?
C87 H87A 0.9900 . ?
C87 H87B 0.9900 . ?
C88 C89 1.518(3) . ?
C88 H88A 0.9900 . ?
C88 H88B 0.9900 . ?
C89 C90 1.523(3) . ?
C89 H89A 0.9900 . ?
C89 H89B 0.9900 . ?
C90 H90A 0.9800 . ?
C90 H90B 0.9800 . ?
C90 H90C 0.9800 . ?

loop_
_geom_angle_atom_site_label_1
_geom_angle_atom_site_label_2
_geom_angle_atom_site_label_3
_geom_angle
_geom_angle_site_symmetry_1
_geom_angle_site_symmetry_3
_geom_angle_publ_flag
C18 O1 C16 114.24(16) . . ?
C28 O2 C26 113.57(18) . . ?
C66 O51 C68 113.80(16) . . ?
C78 O52 C76 114.32(16) . . ?
C4 N1 C1 111.82(15) . . ?
C4 N1 H1 122.0(17) . . ?
C1 N1 H1 126.2(18) . . ?
C4 N2 C9 122.85(16) . . ?
C13 N3 C9 115.18(16) . . ?
C1 N4 C19 122.36(16) . . ?
C23 N5 C19 115.60(17) . . ?
C51 N51 C54 111.49(15) . . ?
C51 N51 H51 124(2) . . ?
C54 N51 H51 123(2) . . ?
C54 N52 C59 122.16(17) . . ?
C63 N53 C59 115.44(17) . . ?
C51 N54 C69 122.78(16) . . ?
C73 N55 C69 115.45(17) . . ?
N4 C1 N1 130.71(16) . . ?
N4 C1 C2 123.72(16) . . ?
N1 C1 C2 105.55(16) . . ?
C5 C2 C3 120.80(16) . . ?
C5 C2 C1 130.66(17) . . ?
C3 C2 C1 108.50(15) . . ?
C2 C3 C8 121.28(16) . . ?
C2 C3 C4 107.84(15) . . ?
C8 C3 C4 130.88(17) . . ?
N2 C4 N1 129.99(16) . . ?
N2 C4 C3 123.63(17) . . ?
N1 C4 C3 106.28(15) . . ?
C2 C5 C6 119.11(17) . . ?
C2 C5 H5 120.4 . . ?
C6 C5 H5 120.4 . . ?
C5 C6 C7 120.45(15) . . ?
C5 C6 C29 118.36(16) . . ?
C7 C6 C29 121.17(16) . . ?
C8 C7 C6 119.54(15) . . ?
C8 C7 C35 121.56(16) . . ?
C6 C7 C35 118.88(15) . . ?
C3 C8 C7 118.77(16) . . ?
C3 C8 H8 120.6 . . ?
C7 C8 H8 120.6 . . ?
N3 C9 N2 121.39(16) . . ?
N3 C9 C10 123.21(17) . . ?
N2 C9 C10 115.34(16) . . ?
C11 C10 C9 120.60(17) . . ?
C11 C10 H10 119.7 . . ?
C9 C10 H10 119.7 . . ?
C10 C11 C12 116.32(17) . . ?
C10 C11 C17 122.00(17) . . ?
C12 C11 C17 121.65(17) . . ?
C13 C12 C11 119.32(17) . . ?
C13 C12 C14 111.27(17) . . ?
C11 C12 C14 129.41(18) . . ?
N3 C13 C12 125.26(17) . . ?
N3 C13 C16 124.03(16) . . ?
C12 C13 C16 110.71(16) . . ?
C12 C14 C15 103.52(15) . . ?
C12 C14 H14A 111.1 . . ?
C15 C14 H14A 111.1 . . ?
C12 C14 H14B 111.1 . . ?
C15 C14 H14B 111.1 . . ?
H14A C14 H14B 109.0 . . ?
C16 C15 C14 107.00(15) . . ?
C16 C15 H15A 110.3 . . ?
C14 C15 H15A 110.3 . . ?
C16 C15 H15B 110.3 . . ?
C14 C15 H15B 110.3 . . ?
H15A C15 H15B 108.6 . . ?
O1 C16 C13 114.85(15) . . ?
O1 C16 C15 108.85(15) . . ?
C13 C16 C15 103.14(16) . . ?
O1 C16 H16 109.9 . . ?
C13 C16 H16 109.9 . . ?
C15 C16 H16 109.9 . . ?
C11 C17 H17A 109.5 . . ?
C11 C17 H17B 109.5 . . ?
H17A C17 H17B 109.5 . . ?
C11 C17 H17C 109.5 . . ?
H17A C17 H17C 109.5 . . ?
H17B C17 H17C 109.5 . . ?
O1 C18 H18A 109.5 . . ?
O1 C18 H18B 109.5 . . ?
H18A C18 H18B 109.5 . . ?
O1 C18 H18C 109.5 . . ?
H18A C18 H18C 109.5 . . ?
H18B C18 H18C 109.5 . . ?
N5 C19 N4 121.50(17) . . ?
N5 C19 C20 122.53(17) . . ?
N4 C19 C20 115.80(17) . . ?
C21 C20 C19 120.98(18) . . ?
C21 C20 H20 119.5 . . ?
C19 C20 H20 119.5 . . ?
C20 C21 C22 116.08(19) . . ?
C20 C21 C27 121.5(2) . . ?
C22 C21 C27 122.34(19) . . ?
C23 C22 C21 119.33(18) . . ?
C23 C22 C24 110.42(19) . . ?
C21 C22 C24 130.2(2) . . ?
N5 C23 C22 125.40(19) . . ?
N5 C23 C26 123.40(19) . . ?
C22 C23 C26 111.00(17) . . ?
C22 C24 C25 103.03(18) . . ?
C22 C24 H24A 111.2 . . ?
C25 C24 H24A 111.2 . . ?
C22 C24 H24B 111.2 . . ?
C25 C24 H24B 111.2 . . ?
H24A C24 H24B 109.1 . . ?
C26 C25 C24 106.62(17) . . ?
C26 C25 H25A 110.4 . . ?
C24 C25 H25A 110.4 . . ?
C26 C25 H25B 110.4 . . ?
C24 C25 H25B 110.4 . . ?
H25A C25 H25B 108.6 . . ?
O2 C26 C23 111.32(17) . . ?
O2 C26 C25 108.65(18) . . ?
C23 C26 C25 102.54(19) . . ?
O2 C26 H26 111.3 . . ?
C23 C26 H26 111.3 . . ?
C25 C26 H26 111.3 . . ?
C21 C27 H27A 109.5 . . ?
C21 C27 H27B 109.5 . . ?
H27A C27 H27B 109.5 . . ?
C21 C27 H27C 109.5 . . ?
H27A C27 H27C 109.5 . . ?
H27B C27 H27C 109.5 . . ?
O2 C28 H28A 109.5 . . ?
O2 C28 H28B 109.5 . . ?
H28A C28 H28B 109.5 . . ?
O2 C28 H28C 109.5 . . ?
H28A C28 H28C 109.5 . . ?
H28B C28 H28C 109.5 . . ?
C6 C29 C30 112.59(14) . . ?
C6 C29 H29A 109.1 . . ?
C30 C29 H29A 109.1 . . ?
C6 C29 H29B 109.1 . . ?
C30 C29 H29B 109.1 . . ?
H29A C29 H29B 107.8 . . ?
C31 C30 C29 113.17(15) . . ?
C31 C30 H30A 108.9 . . ?
C29 C30 H30A 108.9 . . ?
C31 C30 H30B 108.9 . . ?
C29 C30 H30B 108.9 . . ?
H30A C30 H30B 107.8 . . ?
C32 C31 C30 114.67(17) . . ?
C32 C31 H31A 108.6 . . ?
C30 C31 H31A 108.6 . . ?
C32 C31 H31B 108.6 . . ?
C30 C31 H31B 108.6 . . ?
H31A C31 H31B 107.6 . . ?
C31 C32 C33 112.62(18) . . ?
C31 C32 H32A 109.1 . . ?
C33 C32 H32A 109.1 . . ?
C31 C32 H32B 109.1 . . ?
C33 C32 H32B 109.1 . . ?
H32A C32 H32B 107.8 . . ?
C34 C33 C32 112.6(2) . . ?
C34 C33 H33A 109.1 . . ?
C32 C33 H33A 109.1 . . ?
C34 C33 H33B 109.1 . . ?
C32 C33 H33B 109.1 . . ?
H33A C33 H33B 107.8 . . ?
C33 C34 H34A 109.5 . . ?
C33 C34 H34B 109.5 . . ?
H34A C34 H34B 109.5 . . ?
C33 C34 H34C 109.5 . . ?
H34A C34 H34C 109.5 . . ?
H34B C34 H34C 109.5 . . ?
C7 C35 C36 118.03(14) . . ?
C7 C35 H35A 107.8 . . ?
C36 C35 H35A 107.8 . . ?
C7 C35 H35B 107.8 . . ?
C36 C35 H35B 107.8 . . ?
H35A C35 H35B 107.1 . . ?
C35 C36 C37 109.67(14) . . ?
C35 C36 H36A 109.7 . . ?
C37 C36 H36A 109.7 . . ?
C35 C36 H36B 109.7 . . ?
C37 C36 H36B 109.7 . . ?
H36A C36 H36B 108.2 . . ?
C38 C37 C36 114.07(16) . . ?
C38 C37 H37A 108.7 . . ?
C36 C37 H37A 108.7 . . ?
C38 C37 H37B 108.7 . . ?
C36 C37 H37B 108.7 . . ?
H37A C37 H37B 107.6 . . ?
C37 C38 C39 112.35(17) . . ?
C37 C38 H38A 109.1 . . ?
C39 C38 H38A 109.1 . . ?
C37 C38 H38B 109.1 . . ?
C39 C38 H38B 109.1 . . ?
H38A C38 H38B 107.9 . . ?
C40 C39 C38 112.6(2) . . ?
C40 C39 H39A 109.1 . . ?
C38 C39 H39A 109.1 . . ?
C40 C39 H39B 109.1 . . ?
C38 C39 H39B 109.1 . . ?
H39A C39 H39B 107.8 . . ?
C39 C40 H40A 109.5 . . ?
C39 C40 H40B 109.5 . . ?
H40A C40 H40B 109.5 . . ?
C39 C40 H40C 109.5 . . ?
H40A C40 H40C 109.5 . . ?
H40B C40 H40C 109.5 . . ?
N54 C51 N51 130.62(17) . . ?
N54 C51 C52 123.32(16) . . ?
N51 C51 C52 106.04(16) . . ?
C53 C52 C55 121.25(17) . . ?
C53 C52 C51 108.45(16) . . ?
C55 C52 C51 130.26(17) . . ?
C58 C53 C52 121.25(16) . . ?
C58 C53 C54 130.69(17) . . ?
C52 C53 C54 108.06(16) . . ?
N52 C54 N51 129.84(17) . . ?
N52 C54 C53 124.17(17) . . ?
N51 C54 C53 105.94(15) . . ?
C52 C55 C56 118.77(17) . . ?
C52 C55 H55 120.6 . . ?
C56 C55 H55 120.6 . . ?
C55 C56 C57 119.86(16) . . ?
C55 C56 C79 121.37(17) . . ?
C57 C56 C79 118.74(16) . . ?
C58 C57 C56 120.18(16) . . ?
C58 C57 C85 121.06(17) . . ?
C56 C57 C85 118.74(15) . . ?
C53 C58 C57 118.65(17) . . ?
C53 C58 H58 120.7 . . ?
C57 C58 H58 120.7 . . ?
N53 C59 N52 120.00(17) . . ?
N53 C59 C60 122.75(17) . . ?
N52 C59 C60 117.19(17) . . ?
C61 C60 C59 120.98(18) . . ?
C61 C60 H60 119.5 . . ?
C59 C60 H60 119.5 . . ?
C60 C61 C62 116.28(18) . . ?
C60 C61 C67 121.70(19) . . ?
C62 C61 C67 122.02(18) . . ?
C61 C62 C63 119.15(17) . . ?
C61 C62 C64 130.50(19) . . ?
C63 C62 C64 110.35(18) . . ?
N53 C63 C62 125.18(18) . . ?
N53 C63 C66 123.97(18) . . ?
C62 C63 C66 110.85(16) . . ?
C62 C64 C65 103.33(17) . . ?
C62 C64 H64A 111.1 . . ?
C65 C64 H64A 111.1 . . ?
C62 C64 H64B 111.1 . . ?
C65 C64 H64B 111.1 . . ?
H64A C64 H64B 109.1 . . ?
C66 C65 C64 106.09(16) . . ?
C66 C65 H65A 110.5 . . ?
C64 C65 H65A 110.5 . . ?
C66 C65 H65B 110.5 . . ?
C64 C65 H65B 110.5 . . ?
H65A C65 H65B 108.7 . . ?
O51 C66 C63 114.08(16) . . ?
O51 C66 C65 109.69(16) . . ?
C63 C66 C65 103.06(17) . . ?
O51 C66 H66 109.9 . . ?
C63 C66 H66 109.9 . . ?
C65 C66 H66 109.9 . . ?
C61 C67 H67A 109.5 . . ?
C61 C67 H67B 109.5 . . ?
H67A C67 H67B 109.5 . . ?
C61 C67 H67C 109.5 . . ?
H67A C67 H67C 109.5 . . ?
H67B C67 H67C 109.5 . . ?
O51 C68 H68A 109.5 . . ?
O51 C68 H68B 109.5 . . ?
H68A C68 H68B 109.5 . . ?
O51 C68 H68C 109.5 . . ?
H68A C68 H68C 109.5 . . ?
H68B C68 H68C 109.5 . . ?
N55 C69 N54 121.59(17) . . ?
N55 C69 C70 122.54(17) . . ?
N54 C69 C70 115.87(16) . . ?
C71 C70 C69 121.34(17) . . ?
C71 C70 H70 119.3 . . ?
C69 C70 H70 119.3 . . ?
C70 C71 C72 115.70(17) . . ?
C70 C71 C77 122.19(17) . . ?
C72 C71 C77 122.11(17) . . ?
C73 C72 C71 119.55(17) . . ?
C73 C72 C74 110.16(17) . . ?
C71 C72 C74 130.29(18) . . ?
N55 C73 C72 125.40(17) . . ?
N55 C73 C76 124.06(17) . . ?
C72 C73 C76 110.50(16) . . ?
C72 C74 C75 102.50(16) . . ?
C72 C74 H74A 111.3 . . ?
C75 C74 H74A 111.3 . . ?
C72 C74 H74B 111.3 . . ?
C75 C74 H74B 111.3 . . ?
H74A C74 H74B 109.2 . . ?
C76 C75 C74 105.03(15) . . ?
C76 C75 H75A 110.7 . . ?
C74 C75 H75A 110.7 . . ?
C76 C75 H75B 110.7 . . ?
C74 C75 H75B 110.7 . . ?
H75A C75 H75B 108.8 . . ?
O52 C76 C73 111.56(15) . . ?
O52 C76 C75 107.16(16) . . ?
C73 C76 C75 102.14(16) . . ?
O52 C76 H76 111.8 . . ?
C73 C76 H76 111.8 . . ?
C75 C76 H76 111.8 . . ?
C71 C77 H77A 109.5 . . ?
C71 C77 H77B 109.5 . . ?
H77A C77 H77B 109.5 . . ?
C71 C77 H77C 109.5 . . ?
H77A C77 H77C 109.5 . . ?
H77B C77 H77C 109.5 . . ?
O52 C78 H78A 109.5 . . ?
O52 C78 H78B 109.5 . . ?
H78A C78 H78B 109.5 . . ?
O52 C78 H78C 109.5 . . ?
H78A C78 H78C 109.5 . . ?
H78B C78 H78C 109.5 . . ?
C56 C79 C80 117.16(16) . . ?
C56 C79 H79A 108.0 . . ?
C80 C79 H79A 108.0 . . ?
C56 C79 H79B 108.0 . . ?
C80 C79 H79B 108.0 . . ?
H79A C79 H79B 107.3 . . ?
C81 C80 C79 111.37(16) . . ?
C81 C80 H80A 109.4 . . ?
C79 C80 H80A 109.4 . . ?
C81 C80 H80B 109.4 . . ?
C79 C80 H80B 109.4 . . ?
H80A C80 H80B 108.0 . . ?
C82 C81 C80 113.83(17) . . ?
C82 C81 H81A 108.8 . . ?
C80 C81 H81A 108.8 . . ?
C82 C81 H81B 108.8 . . ?
C80 C81 H81B 108.8 . . ?
H81A C81 H81B 107.7 . . ?
C81 C82 C83 113.30(17) . . ?
C81 C82 H82A 108.9 . . ?
C83 C82 H82A 108.9 . . ?
C81 C82 H82B 108.9 . . ?
C83 C82 H82B 108.9 . . ?
H82A C82 H82B 107.7 . . ?
C82 C83 C84 113.0(2) . . ?
C82 C83 H83A 109.0 . . ?
C84 C83 H83A 109.0 . . ?
C82 C83 H83B 109.0 . . ?
C84 C83 H83B 109.0 . . ?
H83A C83 H83B 107.8 . . ?
C83 C84 H84A 109.5 . . ?
C83 C84 H84B 109.5 . . ?
H84A C84 H84B 109.5 . . ?
C83 C84 H84C 109.5 . . ?
H84A C84 H84C 109.5 . . ?
H84B C84 H84C 109.5 . . ?
C57 C85 C86 116.62(15) . . ?
C57 C85 H85A 108.1 . . ?
C86 C85 H85A 108.1 . . ?
C57 C85 H85B 108.1 . . ?
C86 C85 H85B 108.1 . . ?
H85A C85 H85B 107.3 . . ?
C85 C86 C87 111.89(15) . . ?
C85 C86 H86A 109.2 . . ?
C87 C86 H86A 109.2 . . ?
C85 C86 H86B 109.2 . . ?
C87 C86 H86B 109.2 . . ?
H86A C86 H86B 107.9 . . ?
C88 C87 C86 111.94(15) . . ?
C88 C87 H87A 109.2 . . ?
C86 C87 H87A 109.2 . . ?
C88 C87 H87B 109.2 . . ?
C86 C87 H87B 109.2 . . ?
H87A C87 H87B 107.9 . . ?
C89 C88 C87 114.49(16) . . ?
C89 C88 H88A 108.6 . . ?
C87 C88 H88A 108.6 . . ?
C89 C88 H88B 108.6 . . ?
C87 C88 H88B 108.6 . . ?
H88A C88 H88B 107.6 . . ?
C88 C89 C90 110.94(18) . . ?
C88 C89 H89A 109.5 . . ?
C90 C89 H89A 109.5 . . ?
C88 C89 H89B 109.5 . . ?
C90 C89 H89B 109.5 . . ?
H89A C89 H89B 108.0 . . ?
C89 C90 H90A 109.5 . . ?
C89 C90 H90B 109.5 . . ?
H90A C90 H90B 109.5 . . ?
C89 C90 H90C 109.5 . . ?
H90A C90 H90C 109.5 . . ?
H90B C90 H90C 109.5 . . ?

loop_
_geom_torsion_atom_site_label_1
_geom_torsion_atom_site_label_2
_geom_torsion_atom_site_label_3
_geom_torsion_atom_site_label_4
_geom_torsion
_geom_torsion_site_symmetry_1
_geom_torsion_site_symmetry_2
_geom_torsion_site_symmetry_3
_geom_torsion_site_symmetry_4
_geom_torsion_publ_flag
C19 N4 C1 N1 -7.0(3) . . . . ?
C19 N4 C1 C2 171.44(16) . . . . ?
C4 N1 C1 N4 177.20(18) . . . . ?
C4 N1 C1 C2 -1.41(19) . . . . ?
N4 C1 C2 C5 -0.4(3) . . . . ?
N1 C1 C2 C5 178.37(18) . . . . ?
N4 C1 C2 C3 -177.89(17) . . . . ?
N1 C1 C2 C3 0.84(19) . . . . ?
C5 C2 C3 C8 1.6(3) . . . . ?
C1 C2 C3 C8 179.38(16) . . . . ?
C5 C2 C3 C4 -177.83(16) . . . . ?
C1 C2 C3 C4 -0.01(19) . . . . ?
C9 N2 C4 N1 -5.6(3) . . . . ?
C9 N2 C4 C3 178.49(16) . . . . ?
C1 N1 C4 N2 -175.03(19) . . . . ?
C1 N1 C4 C3 1.41(19) . . . . ?
C2 C3 C4 N2 175.90(17) . . . . ?
C8 C3 C4 N2 -3.4(3) . . . . ?
C2 C3 C4 N1 -0.82(19) . . . . ?
C8 C3 C4 N1 179.86(18) . . . . ?
C3 C2 C5 C6 -0.2(3) . . . . ?
C1 C2 C5 C6 -177.48(17) . . . . ?
C2 C5 C6 C7 -1.8(3) . . . . ?
C2 C5 C6 C29 176.71(16) . . . . ?
C5 C6 C7 C8 2.4(2) . . . . ?
C29 C6 C7 C8 -175.99(16) . . . . ?
C5 C6 C7 C35 -175.86(16) . . . . ?
C29 C6 C7 C35 5.7(2) . . . . ?
C2 C3 C8 C7 -0.9(3) . . . . ?
C4 C3 C8 C7 178.37(17) . . . . ?
C6 C7 C8 C3 -1.1(2) . . . . ?
C35 C7 C8 C3 177.15(17) . . . . ?
C13 N3 C9 N2 -173.54(16) . . . . ?
C13 N3 C9 C10 3.5(3) . . . . ?
C4 N2 C9 N3 -20.0(3) . . . . ?
C4 N2 C9 C10 162.82(18) . . . . ?
N3 C9 C10 C11 -1.5(3) . . . . ?
N2 C9 C10 C11 175.66(17) . . . . ?
C9 C10 C11 C12 -1.7(3) . . . . ?
C9 C10 C11 C17 -179.8(2) . . . . ?
C10 C11 C12 C13 2.8(3) . . . . ?
C17 C11 C12 C13 -179.14(19) . . . . ?
C10 C11 C12 C14 -178.0(2) . . . . ?
C17 C11 C12 C14 0.1(3) . . . . ?
C9 N3 C13 C12 -2.3(3) . . . . ?
C9 N3 C13 C16 177.69(17) . . . . ?
C11 C12 C13 N3 -0.8(3) . . . . ?
C14 C12 C13 N3 179.83(18) . . . . ?
C11 C12 C13 C16 179.16(17) . . . . ?
C14 C12 C13 C16 -0.2(2) . . . . ?
C13 C12 C14 C15 -12.5(2) . . . . ?
C11 C12 C14 C15 168.2(2) . . . . ?
C12 C14 C15 C16 20.1(2) . . . . ?
C18 O1 C16 C13 92.9(2) . . . . ?
C18 O1 C16 C15 -152.14(17) . . . . ?
N3 C13 C16 O1 -48.9(2) . . . . ?
C12 C13 C16 O1 131.07(18) . . . . ?
N3 C13 C16 C15 -167.21(17) . . . . ?
C12 C13 C16 C15 12.8(2) . . . . ?
C14 C15 C16 O1 -142.52(17) . . . . ?
C14 C15 C16 C13 -20.1(2) . . . . ?
C23 N5 C19 N4 -171.72(17) . . . . ?
C23 N5 C19 C20 3.4(3) . . . . ?
C1 N4 C19 N5 -2.5(3) . . . . ?
C1 N4 C19 C20 -177.95(17) . . . . ?
N5 C19 C20 C21 -2.3(3) . . . . ?
N4 C19 C20 C21 173.05(18) . . . . ?
C19 C20 C21 C22 -0.1(3) . . . . ?
C19 C20 C21 C27 -177.95(19) . . . . ?
C20 C21 C22 C23 1.1(3) . . . . ?
C27 C21 C22 C23 179.0(2) . . . . ?
C20 C21 C22 C24 -176.2(2) . . . . ?
C27 C21 C22 C24 1.7(4) . . . . ?
C19 N5 C23 C22 -2.3(3) . . . . ?
C19 N5 C23 C26 172.01(18) . . . . ?
C21 C22 C23 N5 0.1(3) . . . . ?
C24 C22 C23 N5 177.91(19) . . . . ?
C21 C22 C23 C26 -174.84(19) . . . . ?
C24 C22 C23 C26 3.0(2) . . . . ?
C23 C22 C24 C25 12.8(2) . . . . ?
C21 C22 C24 C25 -169.7(2) . . . . ?
C22 C24 C25 C26 -23.4(3) . . . . ?
C28 O2 C26 C23 76.9(2) . . . . ?
C28 O2 C26 C25 -170.89(19) . . . . ?
N5 C23 C26 O2 -76.6(2) . . . . ?
C22 C23 C26 O2 98.5(2) . . . . ?
N5 C23 C26 C25 167.4(2) . . . . ?
C22 C23 C26 C25 -17.5(2) . . . . ?
C24 C25 C26 O2 -93.0(2) . . . . ?
C24 C25 C26 C23 24.9(2) . . . . ?
C5 C6 C29 C30 -97.4(2) . . . . ?
C7 C6 C29 C30 81.0(2) . . . . ?
C6 C29 C30 C31 173.45(16) . . . . ?
C29 C30 C31 C32 61.0(2) . . . . ?
C30 C31 C32 C33 171.39(18) . . . . ?
C31 C32 C33 C34 172.7(2) . . . . ?
C8 C7 C35 C36 1.8(2) . . . . ?
C6 C7 C35 C36 -179.97(15) . . . . ?
C7 C35 C36 C37 -178.83(15) . . . . ?
C35 C36 C37 C38 -178.93(15) . . . . ?
C36 C37 C38 C39 -179.75(16) . . . . ?
C37 C38 C39 C40 179.76(17) . . . . ?
C69 N54 C51 N51 2.2(3) . . . . ?
C69 N54 C51 C52 -176.14(16) . . . . ?
C54 N51 C51 N54 -179.18(18) . . . . ?
C54 N51 C51 C52 -0.64(19) . . . . ?
N54 C51 C52 C53 178.34(16) . . . . ?
N51 C51 C52 C53 -0.33(19) . . . . ?
N54 C51 C52 C55 0.6(3) . . . . ?
N51 C51 C52 C55 -178.03(18) . . . . ?
C55 C52 C53 C58 -0.9(3) . . . . ?
C51 C52 C53 C58 -178.80(16) . . . . ?
C55 C52 C53 C54 179.06(16) . . . . ?
C51 C52 C53 C54 1.11(19) . . . . ?
C59 N52 C54 N51 -5.3(3) . . . . ?
C59 N52 C54 C53 177.79(17) . . . . ?
C51 N51 C54 N52 -176.06(18) . . . . ?
C51 N51 C54 C53 1.30(19) . . . . ?
C58 C53 C54 N52 -4.0(3) . . . . ?
C52 C53 C54 N52 176.07(17) . . . . ?
C58 C53 C54 N51 178.43(18) . . . . ?
C52 C53 C54 N51 -1.47(19) . . . . ?
C53 C52 C55 C56 -1.1(3) . . . . ?
C51 C52 C55 C56 176.39(17) . . . . ?
C52 C55 C56 C57 2.0(3) . . . . ?
C52 C55 C56 C79 -175.77(16) . . . . ?
C55 C56 C57 C58 -1.1(3) . . . . ?
C79 C56 C57 C58 176.71(16) . . . . ?
C55 C56 C57 C85 177.70(16) . . . . ?
C79 C56 C57 C85 -4.5(2) . . . . ?
C52 C53 C58 C57 1.7(3) . . . . ?
C54 C53 C58 C57 -178.15(17) . . . . ?
C56 C57 C58 C53 -0.8(2) . . . . ?
C85 C57 C58 C53 -179.54(16) . . . . ?
C63 N53 C59 N52 -173.19(16) . . . . ?
C63 N53 C59 C60 3.9(3) . . . . ?
C54 N52 C59 N53 -38.9(3) . . . . ?
C54 N52 C59 C60 143.87(19) . . . . ?
N53 C59 C60 C61 -0.2(3) . . . . ?
N52 C59 C60 C61 176.93(17) . . . . ?
C59 C60 C61 C62 -3.7(3) . . . . ?
C59 C60 C61 C67 176.95(19) . . . . ?
C60 C61 C62 C63 3.7(3) . . . . ?
C67 C61 C62 C63 -176.88(19) . . . . ?
C60 C61 C62 C64 -175.2(2) . . . . ?
C67 C61 C62 C64 4.2(3) . . . . ?
C59 N53 C63 C62 -3.8(3) . . . . ?
C59 N53 C63 C66 176.22(17) . . . . ?
C61 C62 C63 N53 0.0(3) . . . . ?
C64 C62 C63 N53 179.10(18) . . . . ?
C61 C62 C63 C66 179.97(17) . . . . ?
C64 C62 C63 C66 -0.9(2) . . . . ?
C61 C62 C64 C65 164.5(2) . . . . ?
C63 C62 C64 C65 -14.5(2) . . . . ?
C62 C64 C65 C66 23.9(2) . . . . ?
C68 O51 C66 C63 86.0(2) . . . . ?
C68 O51 C66 C65 -159.02(18) . . . . ?
N53 C63 C66 O51 -45.2(2) . . . . ?
C62 C63 C66 O51 134.80(17) . . . . ?
N53 C63 C66 C65 -164.07(17) . . . . ?
C62 C63 C66 C65 16.0(2) . . . . ?
C64 C65 C66 O51 -146.17(17) . . . . ?
C64 C65 C66 C63 -24.3(2) . . . . ?
C73 N55 C69 N54 178.68(16) . . . . ?
C73 N55 C69 C70 -0.9(2) . . . . ?
C51 N54 C69 N55 0.8(3) . . . . ?
C51 N54 C69 C70 -179.65(16) . . . . ?
N55 C69 C70 C71 1.5(3) . . . . ?
N54 C69 C70 C71 -178.08(16) . . . . ?
C69 C70 C71 C72 -1.0(3) . . . . ?
C69 C70 C71 C77 178.69(17) . . . . ?
C70 C71 C72 C73 0.0(3) . . . . ?
C77 C71 C72 C73 -179.68(17) . . . . ?
C70 C71 C72 C74 -179.67(18) . . . . ?
C77 C71 C72 C74 0.7(3) . . . . ?
C69 N55 C73 C72 -0.2(3) . . . . ?
C69 N55 C73 C76 177.30(17) . . . . ?
C71 C72 C73 N55 0.6(3) . . . . ?
C74 C72 C73 N55 -179.66(17) . . . . ?
C71 C72 C73 C76 -177.14(16) . . . . ?
C74 C72 C73 C76 2.6(2) . . . . ?
C73 C72 C74 C75 16.6(2) . . . . ?
C71 C72 C74 C75 -163.75(19) . . . . ?
C72 C74 C75 C76 -28.92(19) . . . . ?
C78 O52 C76 C73 72.5(2) . . . . ?
C78 O52 C76 C75 -176.47(16) . . . . ?
N55 C73 C76 O52 -84.4(2) . . . . ?
C72 C73 C76 O52 93.38(19) . . . . ?
N55 C73 C76 C75 161.42(18) . . . . ?
C72 C73 C76 C75 -20.8(2) . . . . ?
C74 C75 C76 O52 -87.19(18) . . . . ?
C74 C75 C76 C73 30.19(19) . . . . ?
C55 C56 C79 C80 -8.3(3) . . . . ?
C57 C56 C79 C80 173.89(16) . . . . ?
C56 C79 C80 C81 171.31(16) . . . . ?
C79 C80 C81 C82 168.55(16) . . . . ?
C80 C81 C82 C83 179.18(17) . . . . ?
C81 C82 C83 C84 176.43(19) . . . . ?
C58 C57 C85 C86 -1.9(2) . . . . ?
C56 C57 C85 C86 179.29(15) . . . . ?
C57 C85 C86 C87 178.34(15) . . . . ?
C85 C86 C87 C88 177.60(15) . . . . ?
C86 C87 C88 C89 -178.11(16) . . . . ?
C87 C88 C89 C90 172.59(17) . . . . ?

_diffrn_measured_fraction_theta_max 0.924
_diffrn_reflns_theta_full        26.37
_diffrn_measured_fraction_theta_full 0.980
_refine_diff_density_max         0.479
_refine_diff_density_min         -0.261
_refine_diff_density_rms         0.054

_diffrn_ambient_environment      'perfluoro polyether oil'
_diffrn_measurement_device       'three-circle diffractometer'
_diffrn_measurement_specimen_support 'polyimid foil'
_diffrn_detector                 'CCD plate'
_diffrn_detector_type            CCD-PXL-KAF2


#==end==


 
data_SS-8

_audit_creation_method           SHELXL-97
_audit_block_code                ga_ds42
_audit_block_refno               1281
_audit_update_record             'Tue Sep 18 11:59:15 CEST 2012'

_audit_block_usercomment         des490


_chemical_name_systematic        ?
_chemical_name_common            ?
_chemical_formula_moiety         ?
_chemical_formula_sum            'C40 H37 N5 O2'
_chemical_melting_point          ?

_exptl_crystal_description       block
_exptl_crystal_colour            'dark orange'

_diffrn_ambient_temperature      100(2)
_chemical_formula_weight         619.75

loop_
_atom_type_symbol
_atom_type_description
_atom_type_scat_dispersion_real
_atom_type_scat_dispersion_imag
_atom_type_scat_source
C C 0.0033 0.0000 'International Tables Vol C Tables 4.2.6.8 and 6.1.1.4'
H H 0.0000 0.0000 'International Tables Vol C Tables 4.2.6.8 and 6.1.1.4'
N N 0.0061 0.0000 'International Tables Vol C Tables 4.2.6.8 and 6.1.1.4'
O O 0.0106 0.0000 'International Tables Vol C Tables 4.2.6.8 and 6.1.1.4'

_symmetry_cell_setting           monoclinic
_symmetry_space_group_name_H-M   'P 21'
_symmetry_int_tables_number      4

_chemical_absolute_configuration syn

loop_
_symmetry_equiv_pos_as_xyz
'x, y, z'
'-x, y+1/2, -z'

_cell_length_a                   15.171(7)
_cell_length_b                   7.052(3)
_cell_length_c                   16.168(7)
_cell_angle_alpha                90.00
_cell_angle_beta                 113.144(7)
_cell_angle_gamma                90.00
_cell_volume                     1590.6(12)
_cell_formula_units_Z            2
_cell_measurement_temperature    100(2)
_cell_measurement_reflns_used    8084
_cell_measurement_theta_min      2.36
_cell_measurement_theta_max      31.89
_exptl_crystal_size_max          0.25
_exptl_crystal_size_mid          0.21
_exptl_crystal_size_min          0.11
_exptl_crystal_density_meas      ?
_exptl_crystal_density_diffrn    1.294
_exptl_crystal_density_method    'not measured'
_exptl_crystal_F_000             656
_exptl_absorpt_coefficient_mu    0.081

_exptl_absorpt_correction_type   multi-scan
_exptl_absorpt_correction_T_min  0.8106
_exptl_absorpt_correction_T_max  0.8623
_exptl_absorpt_process_details   
;
multi-scan from symmetry-related measurements (Blessing 1995)
SADABS (Sheldrick & Bruker AXS, 2004-2008)
;

_exptl_special_details           
; 
 ? 
;
_diffrn_radiation_probe          x-ray
_diffrn_radiation_type           MoK\a
_diffrn_radiation_wavelength     0.71073
_diffrn_source                   'fine-focus sealed tube (Mo)'
_diffrn_radiation_monochromator  graphite
_diffrn_measurement_device_type  'Bruker AXS Smart 1000'
_diffrn_measurement_method       '\f- and \w-scans'
_diffrn_detector_area_resol_mean 8.19
_diffrn_reflns_number            40254
_diffrn_reflns_av_R_equivalents  0.0329
_diffrn_reflns_av_sigmaI/netI    0.0201
_diffrn_reflns_limit_h_min       -22
_diffrn_reflns_limit_h_max       22
_diffrn_reflns_limit_k_min       -10
_diffrn_reflns_limit_k_max       10
_diffrn_reflns_limit_l_min       -23
_diffrn_reflns_limit_l_max       24
_diffrn_reflns_theta_min         2.36
_diffrn_reflns_theta_max         32.29
_reflns_number_total             5802
_reflns_number_gt                5463
_reflns_threshold_expression     >2sigma(I)
_computing_data_collection       'SMART-5.631 (Bruker AXS, 2003)'

_computing_cell_refinement       
;
SAINT 8.x (Bruker AXS, 1997-2011). Includes estimated systematic errors
 of the unit cell constants from Monte Carlo simulations.
;
_computing_data_reduction        'SAINT 8.x (Bruker AXS, 1997-2011)'
_computing_structure_solution    'SUPERFLIP (Palatinus, 2007-2009)'
_computing_structure_refinement  'SHELXL-97 (Sheldrick, 2008)'
_computing_molecular_graphics    ?
_computing_publication_material  'encifer 1.4 (CCDC, 2011)'

_refine_special_details          
; 
 Refinement of F^2^ against ALL reflections.  The weighted R-factor wR and 
 goodness of fit S are based on F^2^, conventional R-factors R are based 
 on F, with F set to zero for negative F^2^. The threshold expression of 
 F^2^ > 2sigma(F^2^) is used only for calculating R-factors(gt) etc. and is 
 not relevant to the choice of reflections for refinement.  R-factors based 
 on F^2^ are statistically about twice as large as those based on F, and R- 
 factors based on ALL data will be even larger. 
;

_refine_ls_structure_factor_coef Fsqd
_refine_ls_matrix_type           full
_refine_ls_weighting_scheme      calc
_refine_ls_weighting_details     
'calc w=1/[\s^2^(Fo^2^)+(0.0843P)^2^+0.1304P] where P=(Fo^2^+2Fc^2^)/3'
_atom_sites_solution_primary     iterative
_atom_sites_solution_secondary   difmap
_atom_sites_solution_hydrogens   mixed
_refine_ls_hydrogen_treatment    mixed
_refine_ls_extinction_method     none
_refine_ls_extinction_coef       ?
_refine_ls_abs_structure_details 'Flack H D (1983), Acta Cryst. A39, 876-881'
_refine_ls_abs_structure_Flack   .
_refine_ls_number_reflns         5802
_refine_ls_number_parameters     507
_refine_ls_number_restraints     1
_refine_ls_R_factor_all          0.0453
_refine_ls_R_factor_gt           0.0422
_refine_ls_wR_factor_ref         0.1128
_refine_ls_wR_factor_gt          0.1091
_refine_ls_goodness_of_fit_ref   1.058
_refine_ls_restrained_S_all      1.058
_refine_ls_shift/su_max          0.001
_refine_ls_shift/su_mean         0.000

loop_
_atom_site_label
_atom_site_type_symbol
_atom_site_fract_x
_atom_site_fract_y
_atom_site_fract_z
_atom_site_U_iso_or_equiv
_atom_site_adp_type
_atom_site_occupancy
_atom_site_symmetry_multiplicity
_atom_site_calc_flag
_atom_site_refinement_flags
_atom_site_disorder_assembly
_atom_site_disorder_group
O1 O 0.26585(9) 0.88489(19) 0.29286(7) 0.0253(2) Uani 1 1 d . . .
O2 O 0.04001(8) 0.39477(19) 0.24749(7) 0.0239(2) Uani 1 1 d . . .
N1 N 0.20302(8) 0.65349(18) 0.57822(7) 0.0150(2) Uani 1 1 d . . .
H1 H 0.1945(14) 0.654(3) 0.5227(14) 0.018 Uiso 1 1 d . . .
N2 N 0.37683(8) 0.6998(2) 0.64472(7) 0.0160(2) Uani 1 1 d . . .
N3 N 0.32606(8) 0.6937(2) 0.48315(7) 0.0171(2) Uani 1 1 d . . .
N4 N 0.04123(8) 0.61204(19) 0.57406(7) 0.0149(2) Uani 1 1 d . . .
N5 N 0.03864(8) 0.60115(19) 0.42504(7) 0.0154(2) Uani 1 1 d . . .
C1 C 0.13253(9) 0.6311(2) 0.61273(8) 0.0131(2) Uani 1 1 d . . .
C2 C 0.18263(9) 0.6416(2) 0.71119(8) 0.0133(2) Uani 1 1 d . . .
C3 C 0.27863(9) 0.6808(2) 0.73131(8) 0.0137(2) Uani 1 1 d . . .
C4 C 0.29297(9) 0.6824(2) 0.64618(8) 0.0140(2) Uani 1 1 d . . .
C5 C 0.14933(9) 0.6161(2) 0.77858(8) 0.0140(2) Uani 1 1 d . . .
H5 H 0.0870(14) 0.574(3) 0.7660(13) 0.017 Uiso 1 1 d . . .
C6 C 0.21412(9) 0.6325(2) 0.86862(8) 0.0137(2) Uani 1 1 d . . .
C7 C 0.31005(9) 0.6907(2) 0.88843(8) 0.0134(2) Uani 1 1 d . . .
C8 C 0.34289(9) 0.7103(2) 0.81915(8) 0.0142(2) Uani 1 1 d . . .
H8 H 0.4099(14) 0.756(3) 0.8297(13) 0.017 Uiso 1 1 d . . .
C9 C 0.39605(10) 0.6942(2) 0.56686(9) 0.0160(2) Uani 1 1 d . . .
C10 C 0.49441(10) 0.6911(2) 0.58348(9) 0.0168(2) Uani 1 1 d . . .
H10 H 0.5399(15) 0.693(4) 0.6424(14) 0.020 Uiso 1 1 d . . .
C11 C 0.52526(9) 0.6865(2) 0.51370(9) 0.0178(2) Uani 1 1 d . . .
C12 C 0.45346(10) 0.6830(2) 0.42736(9) 0.0177(2) Uani 1 1 d . . .
C13 C 0.35740(10) 0.6889(2) 0.41614(9) 0.0174(2) Uani 1 1 d . . .
C14 C 0.46256(11) 0.6740(3) 0.33831(9) 0.0219(3) Uani 1 1 d . . .
H14A H 0.5124(16) 0.586(4) 0.3352(15) 0.026 Uiso 1 1 d . . .
H14B H 0.4784(16) 0.798(4) 0.3218(15) 0.026 Uiso 1 1 d . . .
C15 C 0.36066(11) 0.6144(3) 0.27414(10) 0.0220(3) Uani 1 1 d . . .
H15A H 0.3416(15) 0.653(4) 0.2099(15) 0.026 Uiso 1 1 d . . .
H15B H 0.3551(17) 0.480(4) 0.2742(16) 0.026 Uiso 1 1 d . . .
C16 C 0.29340(11) 0.6911(3) 0.31681(9) 0.0199(3) Uani 1 1 d . . .
H16 H 0.2309(15) 0.620(4) 0.3037(15) 0.024 Uiso 1 1 d . . .
C17 C 0.62971(10) 0.6859(3) 0.52935(10) 0.0223(3) Uani 1 1 d . . .
H17A H 0.6463(4) 0.806(2) 0.5102(11) 0.033 Uiso 1 1 calc R . .
H17B H 0.6421(3) 0.584(2) 0.4951(11) 0.033 Uiso 1 1 calc R . .
H17C H 0.6681(5) 0.667(2) 0.5928(9) 0.033 Uiso 1 1 calc R . .
C18 C 0.19878(12) 0.9044(3) 0.20235(10) 0.0274(3) Uani 1 1 d . . .
H18A H 0.2261(6) 0.863(2) 0.1640(7) 0.041 Uiso 1 1 calc R . .
H18B H 0.1818(9) 1.030(2) 0.1907(4) 0.041 Uiso 1 1 calc R . .
H18C H 0.1451(11) 0.833(2) 0.1939(3) 0.041 Uiso 1 1 calc R . .
C19 C -0.00798(9) 0.6128(2) 0.48063(8) 0.0141(2) Uani 1 1 d . . .
C20 C -0.10792(9) 0.6292(2) 0.44958(8) 0.0157(2) Uani 1 1 d . . .
H20 H -0.1403(14) 0.639(3) 0.4963(13) 0.019 Uiso 1 1 d . . .
C21 C -0.16416(9) 0.6404(2) 0.35790(9) 0.0150(2) Uani 1 1 d . . .
C22 C -0.11628(9) 0.6256(2) 0.30022(8) 0.0142(2) Uani 1 1 d . . .
C23 C -0.01706(9) 0.6041(2) 0.33715(8) 0.0148(2) Uani 1 1 d . . .
C24 C -0.15430(10) 0.6313(2) 0.19929(9) 0.0172(2) Uani 1 1 d . . .
H24A H -0.2031(16) 0.735(4) 0.1729(14) 0.021 Uiso 1 1 d . . .
H24B H -0.1861(15) 0.510(4) 0.1763(15) 0.021 Uiso 1 1 d . . .
C25 C -0.06224(11) 0.6579(2) 0.18058(9) 0.0210(3) Uani 1 1 d . . .
H25A H -0.0630(16) 0.593(4) 0.1296(15) 0.025 Uiso 1 1 d . . .
H25B H -0.0551(16) 0.789(4) 0.1730(15) 0.025 Uiso 1 1 d . . .
C26 C 0.02141(10) 0.5867(2) 0.26446(9) 0.0178(3) Uani 1 1 d . . .
H26 H 0.0818(15) 0.658(4) 0.2790(14) 0.021 Uiso 1 1 d . . .
C27 C -0.27069(9) 0.6725(2) 0.32376(9) 0.0196(3) Uani 1 1 d . . .
H27A H -0.2891(3) 0.686(2) 0.3736(7) 0.029 Uiso 1 1 calc R . .
H27B H -0.3035(5) 0.5668(19) 0.2878(10) 0.029 Uiso 1 1 calc R . .
H27C H -0.2871(3) 0.785(2) 0.2882(11) 0.029 Uiso 1 1 calc R . .
C28 C 0.10813(11) 0.2992(3) 0.32296(11) 0.0244(3) Uani 1 1 d . . .
H28A H 0.1261(9) 0.187(2) 0.3043(3) 0.037 Uiso 1 1 calc R . .
H28B H 0.0812(6) 0.273(2) 0.3639(8) 0.037 Uiso 1 1 calc R . .
H28C H 0.1613(10) 0.3751(15) 0.3496(8) 0.037 Uiso 1 1 calc R . .
C29 C 0.18219(9) 0.5761(2) 0.94089(8) 0.0150(2) Uani 1 1 d . . .
C30 C 0.09465(10) 0.6380(2) 0.94098(9) 0.0186(3) Uani 1 1 d . . .
H30 H 0.0571(16) 0.727(4) 0.8949(14) 0.022 Uiso 1 1 d . . .
C31 C 0.06382(11) 0.5758(3) 1.00647(10) 0.0233(3) Uani 1 1 d . . .
H31 H 0.003(2) 0.608(4) 1.0061(19) 0.028 Uiso 1 1 d . . .
C32 C 0.11897(12) 0.4491(3) 1.07277(10) 0.0242(3) Uani 1 1 d . . .
H32 H 0.1012(16) 0.405(4) 1.1181(15) 0.029 Uiso 1 1 d . . .
C33 C 0.20525(11) 0.3843(3) 1.07201(9) 0.0223(3) Uani 1 1 d . . .
H33 H 0.2477(16) 0.297(4) 1.1200(15) 0.027 Uiso 1 1 d . . .
C34 C 0.23706(10) 0.4475(2) 1.00713(9) 0.0181(3) Uani 1 1 d . . .
H34 H 0.2969(16) 0.405(4) 1.0061(15) 0.022 Uiso 1 1 d . . .
C35 C 0.37632(9) 0.7418(2) 0.98135(8) 0.0142(2) Uani 1 1 d . . .
C36 C 0.34818(10) 0.8728(2) 1.03150(9) 0.0169(2) Uani 1 1 d . . .
H36 H 0.2861(15) 0.917(3) 1.0067(15) 0.020 Uiso 1 1 d . . .
C37 C 0.41154(10) 0.9263(2) 1.11726(9) 0.0200(3) Uani 1 1 d . . .
H37 H 0.3948(16) 1.016(4) 1.1559(15) 0.024 Uiso 1 1 d . . .
C38 C 0.50304(10) 0.8498(2) 1.15411(9) 0.0202(3) Uani 1 1 d . . .
H38 H 0.5437(16) 0.882(4) 1.2097(15) 0.024 Uiso 1 1 d . . .
C39 C 0.53190(10) 0.7195(3) 1.10489(9) 0.0212(3) Uani 1 1 d . . .
H39 H 0.5933(16) 0.663(4) 1.1270(15) 0.025 Uiso 1 1 d . . .
C40 C 0.46909(10) 0.6671(2) 1.01878(9) 0.0182(3) Uani 1 1 d . . .
H40 H 0.4894(16) 0.582(4) 0.9863(15) 0.022 Uiso 1 1 d . . .

loop_
_atom_site_aniso_label
_atom_site_aniso_U_11
_atom_site_aniso_U_22
_atom_site_aniso_U_33
_atom_site_aniso_U_23
_atom_site_aniso_U_13
_atom_site_aniso_U_12
O1 0.0317(6) 0.0265(6) 0.0146(5) 0.0023(4) 0.0056(4) 0.0028(5)
O2 0.0279(5) 0.0295(6) 0.0136(4) 0.0013(4) 0.0075(4) 0.0100(5)
N1 0.0137(4) 0.0212(6) 0.0086(4) 0.0000(4) 0.0028(3) 0.0009(4)
N2 0.0162(5) 0.0219(6) 0.0104(4) 0.0007(4) 0.0057(4) -0.0009(4)
N3 0.0180(5) 0.0220(5) 0.0112(4) 0.0005(4) 0.0055(4) -0.0012(5)
N4 0.0148(5) 0.0187(5) 0.0082(4) -0.0006(4) 0.0015(3) 0.0011(4)
N5 0.0150(4) 0.0199(6) 0.0104(4) -0.0007(4) 0.0039(4) 0.0000(4)
C1 0.0143(5) 0.0155(5) 0.0085(4) 0.0004(4) 0.0035(4) 0.0006(4)
C2 0.0146(5) 0.0159(6) 0.0077(4) -0.0005(4) 0.0026(4) 0.0011(5)
C3 0.0148(5) 0.0170(6) 0.0086(5) 0.0004(4) 0.0037(4) 0.0012(5)
C4 0.0150(5) 0.0166(5) 0.0096(5) -0.0004(5) 0.0039(4) 0.0006(5)
C5 0.0136(5) 0.0173(6) 0.0102(5) -0.0003(4) 0.0037(4) -0.0005(5)
C6 0.0143(5) 0.0165(5) 0.0093(5) 0.0000(4) 0.0038(4) 0.0001(5)
C7 0.0135(5) 0.0168(5) 0.0084(5) -0.0002(4) 0.0025(4) 0.0004(5)
C8 0.0127(5) 0.0193(6) 0.0093(5) -0.0001(4) 0.0029(4) 0.0005(5)
C9 0.0173(5) 0.0188(6) 0.0128(5) 0.0006(5) 0.0070(4) -0.0014(5)
C10 0.0168(5) 0.0202(6) 0.0135(5) 0.0004(5) 0.0058(4) -0.0018(5)
C11 0.0175(6) 0.0203(6) 0.0163(6) 0.0002(5) 0.0076(5) -0.0029(5)
C12 0.0205(6) 0.0209(6) 0.0135(5) 0.0003(5) 0.0087(5) -0.0028(5)
C13 0.0201(6) 0.0205(6) 0.0123(5) 0.0002(5) 0.0069(4) -0.0019(5)
C14 0.0235(6) 0.0304(8) 0.0143(5) -0.0003(6) 0.0103(5) -0.0032(6)
C15 0.0258(6) 0.0273(7) 0.0146(5) -0.0025(5) 0.0097(5) -0.0023(6)
C16 0.0217(6) 0.0249(7) 0.0119(5) 0.0017(5) 0.0054(5) -0.0007(6)
C17 0.0184(6) 0.0288(7) 0.0217(6) -0.0003(6) 0.0101(5) -0.0027(6)
C18 0.0297(8) 0.0355(9) 0.0155(6) 0.0065(6) 0.0072(5) 0.0010(7)
C19 0.0148(5) 0.0166(6) 0.0095(5) -0.0006(4) 0.0034(4) 0.0004(5)
C20 0.0146(5) 0.0202(6) 0.0113(5) -0.0012(5) 0.0039(4) 0.0001(5)
C21 0.0132(5) 0.0164(6) 0.0128(5) -0.0010(4) 0.0023(4) 0.0001(5)
C22 0.0161(5) 0.0152(5) 0.0095(5) -0.0001(4) 0.0030(4) -0.0003(5)
C23 0.0160(5) 0.0175(6) 0.0102(5) 0.0005(4) 0.0043(4) 0.0006(5)
C24 0.0199(6) 0.0189(6) 0.0095(5) 0.0011(5) 0.0021(4) 0.0015(5)
C25 0.0239(6) 0.0276(8) 0.0117(5) 0.0039(5) 0.0072(5) 0.0052(6)
C26 0.0183(6) 0.0239(7) 0.0123(5) 0.0028(5) 0.0070(4) 0.0014(5)
C27 0.0136(5) 0.0254(7) 0.0170(6) -0.0016(5) 0.0029(4) 0.0005(5)
C28 0.0225(7) 0.0282(8) 0.0224(7) 0.0080(6) 0.0088(5) 0.0070(6)
C29 0.0168(5) 0.0178(6) 0.0097(5) -0.0011(4) 0.0046(4) -0.0025(5)
C30 0.0199(6) 0.0229(7) 0.0144(5) 0.0006(5) 0.0084(4) 0.0001(5)
C31 0.0242(6) 0.0300(8) 0.0206(6) 0.0001(6) 0.0142(5) -0.0010(6)
C32 0.0293(7) 0.0296(8) 0.0159(6) 0.0004(6) 0.0113(5) -0.0069(6)
C33 0.0258(7) 0.0253(7) 0.0136(6) 0.0045(5) 0.0055(5) -0.0041(6)
C34 0.0194(6) 0.0213(6) 0.0125(5) 0.0017(5) 0.0050(4) -0.0021(5)
C35 0.0140(5) 0.0184(6) 0.0095(5) 0.0002(4) 0.0038(4) -0.0012(5)
C36 0.0157(5) 0.0221(6) 0.0123(5) -0.0025(5) 0.0049(4) -0.0016(5)
C37 0.0209(6) 0.0265(7) 0.0135(5) -0.0052(5) 0.0077(5) -0.0056(6)
C38 0.0196(6) 0.0293(7) 0.0097(5) -0.0012(5) 0.0036(4) -0.0064(6)
C39 0.0167(6) 0.0294(8) 0.0127(5) 0.0010(5) 0.0008(5) 0.0008(5)
C40 0.0167(5) 0.0230(7) 0.0123(5) 0.0003(5) 0.0027(4) 0.0024(5)

_geom_special_details            
; 
 All esds (except the esd in the dihedral angle between two l.s. planes) 
 are estimated using the full covariance matrix.  The cell esds are taken 
 into account individually in the estimation of esds in distances, angles 
 and torsion angles; correlations between esds in cell parameters are only 
 used when they are defined by crystal symmetry.  An approximate (isotropic) 
 treatment of cell esds is used for estimating esds involving l.s. planes. 
;

loop_
_geom_bond_atom_site_label_1
_geom_bond_atom_site_label_2
_geom_bond_distance
_geom_bond_site_symmetry_2
_geom_bond_publ_flag
O1 C18 1.4230(19) . ?
O1 C16 1.437(2) . ?
O2 C28 1.4213(19) . ?
O2 C26 1.431(2) . ?
N1 C4 1.3901(17) . ?
N1 C1 1.3960(17) . ?
N1 H1 0.86(2) . ?
N2 C4 1.2876(18) . ?
N2 C9 1.4000(17) . ?
N3 C13 1.3438(17) . ?
N3 C9 1.3527(17) . ?
N4 C1 1.2832(17) . ?
N4 C19 1.3974(16) . ?
N5 C23 1.3378(16) . ?
N5 C19 1.3472(16) . ?
C1 C2 1.4719(17) . ?
C2 C5 1.3811(17) . ?
C2 C3 1.3896(18) . ?
C3 C8 1.3865(17) . ?
C3 C4 1.4755(17) . ?
C5 C6 1.4050(17) . ?
C5 H5 0.93(2) . ?
C6 C7 1.4222(19) . ?
C6 C29 1.4842(18) . ?
C7 C8 1.4001(17) . ?
C7 C35 1.4867(18) . ?
C8 H8 1.02(2) . ?
C9 C10 1.4086(19) . ?
C10 C11 1.3813(18) . ?
C10 H10 0.93(2) . ?
C11 C12 1.3931(19) . ?
C11 C17 1.503(2) . ?
C12 C13 1.397(2) . ?
C12 C14 1.5007(19) . ?
C13 C16 1.5154(19) . ?
C14 C15 1.543(2) . ?
C14 H14A 0.99(2) . ?
C14 H14B 0.97(3) . ?
C15 C16 1.537(2) . ?
C15 H15A 1.00(2) . ?
C15 H15B 0.95(3) . ?
C16 H16 1.02(2) . ?
C17 H17A 0.9697 . ?
C17 H17B 0.9697 . ?
C17 H17C 0.9697 . ?
C18 H18A 0.9190 . ?
C18 H18B 0.9190 . ?
C18 H18C 0.9190 . ?
C19 C20 1.4020(19) . ?
C20 C21 1.3918(17) . ?
C20 H20 1.053(19) . ?
C21 C22 1.3932(18) . ?
C21 C27 1.506(2) . ?
C22 C23 1.3924(18) . ?
C22 C24 1.5024(18) . ?
C23 C26 1.5086(18) . ?
C24 C25 1.552(2) . ?
C24 H24A 1.01(2) . ?
C24 H24B 0.98(2) . ?
C25 C26 1.533(2) . ?
C25 H25A 0.94(2) . ?
C25 H25B 0.95(3) . ?
C26 H26 0.99(2) . ?
C27 H27A 0.9561 . ?
C27 H27B 0.9561 . ?
C27 H27C 0.9561 . ?
C28 H28A 0.9219 . ?
C28 H28B 0.9219 . ?
C28 H28C 0.9219 . ?
C29 C30 1.399(2) . ?
C29 C34 1.401(2) . ?
C30 C31 1.3861(19) . ?
C30 H30 0.97(2) . ?
C31 C32 1.394(2) . ?
C31 H31 0.94(3) . ?
C32 C33 1.391(2) . ?
C32 H32 0.93(2) . ?
C33 C34 1.389(2) . ?
C33 H33 1.00(3) . ?
C34 H34 0.96(2) . ?
C35 C40 1.3980(19) . ?
C35 C36 1.402(2) . ?
C36 C37 1.3932(19) . ?
C36 H36 0.92(2) . ?
C37 C38 1.387(2) . ?
C37 H37 0.99(2) . ?
C38 C39 1.394(2) . ?
C38 H38 0.90(2) . ?
C39 C40 1.3926(19) . ?
C39 H39 0.95(2) . ?
C40 H40 0.93(3) . ?

loop_
_geom_angle_atom_site_label_1
_geom_angle_atom_site_label_2
_geom_angle_atom_site_label_3
_geom_angle
_geom_angle_site_symmetry_1
_geom_angle_site_symmetry_3
_geom_angle_publ_flag
C18 O1 C16 112.55(13) . . ?
C28 O2 C26 114.56(12) . . ?
C4 N1 C1 111.65(11) . . ?
C4 N1 H1 121.7(14) . . ?
C1 N1 H1 126.6(13) . . ?
C4 N2 C9 124.77(11) . . ?
C13 N3 C9 114.79(12) . . ?
C1 N4 C19 122.82(11) . . ?
C23 N5 C19 115.44(11) . . ?
N4 C1 N1 131.82(12) . . ?
N4 C1 C2 122.13(11) . . ?
N1 C1 C2 105.99(11) . . ?
C5 C2 C3 121.07(11) . . ?
C5 C2 C1 130.79(12) . . ?
C3 C2 C1 108.14(11) . . ?
C8 C3 C2 121.32(11) . . ?
C8 C3 C4 130.71(12) . . ?
C2 C3 C4 107.97(11) . . ?
N2 C4 N1 132.04(12) . . ?
N2 C4 C3 121.79(11) . . ?
N1 C4 C3 106.10(11) . . ?
C2 C5 C6 118.87(12) . . ?
C2 C5 H5 121.5(12) . . ?
C6 C5 H5 119.2(12) . . ?
C5 C6 C7 119.63(11) . . ?
C5 C6 C29 118.80(12) . . ?
C7 C6 C29 121.44(11) . . ?
C8 C7 C6 120.17(11) . . ?
C8 C7 C35 118.21(12) . . ?
C6 C7 C35 121.54(11) . . ?
C3 C8 C7 118.47(12) . . ?
C3 C8 H8 118.3(11) . . ?
C7 C8 H8 123.0(11) . . ?
N3 C9 N2 122.74(12) . . ?
N3 C9 C10 123.17(12) . . ?
N2 C9 C10 114.09(11) . . ?
C11 C10 C9 121.20(12) . . ?
C11 C10 H10 118.9(13) . . ?
C9 C10 H10 119.9(13) . . ?
C10 C11 C12 115.87(12) . . ?
C10 C11 C17 122.40(12) . . ?
C12 C11 C17 121.73(12) . . ?
C11 C12 C13 119.65(12) . . ?
C11 C12 C14 129.17(13) . . ?
C13 C12 C14 111.18(12) . . ?
N3 C13 C12 125.29(12) . . ?
N3 C13 C16 124.88(13) . . ?
C12 C13 C16 109.83(11) . . ?
C12 C14 C15 102.18(12) . . ?
C12 C14 H14A 115.7(13) . . ?
C15 C14 H14A 112.2(14) . . ?
C12 C14 H14B 110.6(14) . . ?
C15 C14 H14B 110.5(13) . . ?
H14A C14 H14B 106(2) . . ?
C16 C15 C14 105.58(12) . . ?
C16 C15 H15A 113.5(13) . . ?
C14 C15 H15A 115.4(13) . . ?
C16 C15 H15B 106.0(14) . . ?
C14 C15 H15B 109.7(15) . . ?
H15A C15 H15B 106(2) . . ?
O1 C16 C13 107.02(13) . . ?
O1 C16 C15 112.81(13) . . ?
C13 C16 C15 102.13(12) . . ?
O1 C16 H16 105.4(14) . . ?
C13 C16 H16 111.8(12) . . ?
C15 C16 H16 117.4(13) . . ?
C11 C17 H17A 109.5 . . ?
C11 C17 H17B 109.5 . . ?
H17A C17 H17B 109.5 . . ?
C11 C17 H17C 109.5 . . ?
H17A C17 H17C 109.5 . . ?
H17B C17 H17C 109.5 . . ?
O1 C18 H18A 109.5 . . ?
O1 C18 H18B 109.5 . . ?
H18A C18 H18B 109.5 . . ?
O1 C18 H18C 109.5 . . ?
H18A C18 H18C 109.5 . . ?
H18B C18 H18C 109.5 . . ?
N5 C19 N4 121.56(12) . . ?
N5 C19 C20 122.93(11) . . ?
N4 C19 C20 115.50(11) . . ?
C21 C20 C19 120.66(11) . . ?
C21 C20 H20 119.8(11) . . ?
C19 C20 H20 119.5(11) . . ?
C20 C21 C22 116.49(12) . . ?
C20 C21 C27 121.29(12) . . ?
C22 C21 C27 122.20(12) . . ?
C23 C22 C21 118.76(11) . . ?
C23 C22 C24 110.95(11) . . ?
C21 C22 C24 130.28(12) . . ?
N5 C23 C22 125.62(12) . . ?
N5 C23 C26 123.36(12) . . ?
C22 C23 C26 111.02(11) . . ?
C22 C24 C25 102.95(11) . . ?
C22 C24 H24A 112.6(12) . . ?
C25 C24 H24A 113.4(13) . . ?
C22 C24 H24B 108.1(13) . . ?
C25 C24 H24B 112.2(13) . . ?
H24A C24 H24B 107.5(18) . . ?
C26 C25 C24 106.46(11) . . ?
C26 C25 H25A 109.8(15) . . ?
C24 C25 H25A 114.3(14) . . ?
C26 C25 H25B 109.8(14) . . ?
C24 C25 H25B 107.5(14) . . ?
H25A C25 H25B 109(2) . . ?
O2 C26 C23 113.09(12) . . ?
O2 C26 C25 107.30(12) . . ?
C23 C26 C25 102.90(11) . . ?
O2 C26 H26 107.1(14) . . ?
C23 C26 H26 112.3(12) . . ?
C25 C26 H26 114.1(13) . . ?
C21 C27 H27A 109.5 . . ?
C21 C27 H27B 109.5 . . ?
H27A C27 H27B 109.5 . . ?
C21 C27 H27C 109.5 . . ?
H27A C27 H27C 109.5 . . ?
H27B C27 H27C 109.5 . . ?
O2 C28 H28A 109.5 . . ?
O2 C28 H28B 109.5 . . ?
H28A C28 H28B 109.5 . . ?
O2 C28 H28C 109.5 . . ?
H28A C28 H28C 109.5 . . ?
H28B C28 H28C 109.5 . . ?
C30 C29 C34 118.72(13) . . ?
C30 C29 C6 121.41(12) . . ?
C34 C29 C6 119.71(12) . . ?
C31 C30 C29 120.51(14) . . ?
C31 C30 H30 121.3(13) . . ?
C29 C30 H30 118.2(13) . . ?
C30 C31 C32 120.65(15) . . ?
C30 C31 H31 122.5(17) . . ?
C32 C31 H31 116.7(17) . . ?
C33 C32 C31 119.09(14) . . ?
C33 C32 H32 117.6(15) . . ?
C31 C32 H32 123.3(15) . . ?
C34 C33 C32 120.58(15) . . ?
C34 C33 H33 118.2(13) . . ?
C32 C33 H33 121.1(13) . . ?
C33 C34 C29 120.44(14) . . ?
C33 C34 H34 121.6(14) . . ?
C29 C34 H34 118.0(14) . . ?
C40 C35 C36 118.77(12) . . ?
C40 C35 C7 120.80(12) . . ?
C36 C35 C7 120.36(12) . . ?
C37 C36 C35 120.41(13) . . ?
C37 C36 H36 122.0(14) . . ?
C35 C36 H36 117.6(14) . . ?
C38 C37 C36 120.32(14) . . ?
C38 C37 H37 116.1(13) . . ?
C36 C37 H37 123.6(13) . . ?
C37 C38 C39 119.81(13) . . ?
C37 C38 H38 120.6(15) . . ?
C39 C38 H38 119.6(16) . . ?
C40 C39 C38 120.01(14) . . ?
C40 C39 H39 116.8(14) . . ?
C38 C39 H39 123.2(14) . . ?
C39 C40 C35 120.66(13) . . ?
C39 C40 H40 119.3(14) . . ?
C35 C40 H40 120.1(14) . . ?

loop_
_geom_torsion_atom_site_label_1
_geom_torsion_atom_site_label_2
_geom_torsion_atom_site_label_3
_geom_torsion_atom_site_label_4
_geom_torsion
_geom_torsion_site_symmetry_1
_geom_torsion_site_symmetry_2
_geom_torsion_site_symmetry_3
_geom_torsion_site_symmetry_4
_geom_torsion_publ_flag
C19 N4 C1 N1 -0.8(3) . . . . ?
C19 N4 C1 C2 176.21(12) . . . . ?
C4 N1 C1 N4 175.74(16) . . . . ?
C4 N1 C1 C2 -1.62(16) . . . . ?
N4 C1 C2 C5 7.2(2) . . . . ?
N1 C1 C2 C5 -175.16(15) . . . . ?
N4 C1 C2 C3 -174.14(14) . . . . ?
N1 C1 C2 C3 3.54(15) . . . . ?
C5 C2 C3 C8 -5.0(2) . . . . ?
C1 C2 C3 C8 176.11(13) . . . . ?
C5 C2 C3 C4 174.81(13) . . . . ?
C1 C2 C3 C4 -4.03(15) . . . . ?
C9 N2 C4 N1 0.6(3) . . . . ?
C9 N2 C4 C3 177.09(14) . . . . ?
C1 N1 C4 N2 176.10(16) . . . . ?
C1 N1 C4 C3 -0.78(16) . . . . ?
C8 C3 C4 N2 5.6(3) . . . . ?
C2 C3 C4 N2 -174.24(14) . . . . ?
C8 C3 C4 N1 -177.12(15) . . . . ?
C2 C3 C4 N1 3.04(16) . . . . ?
C3 C2 C5 C6 0.7(2) . . . . ?
C1 C2 C5 C6 179.25(13) . . . . ?
C2 C5 C6 C7 5.4(2) . . . . ?
C2 C5 C6 C29 -170.61(13) . . . . ?
C5 C6 C7 C8 -7.4(2) . . . . ?
C29 C6 C7 C8 168.53(14) . . . . ?
C5 C6 C7 C35 169.43(13) . . . . ?
C29 C6 C7 C35 -14.7(2) . . . . ?
C2 C3 C8 C7 3.0(2) . . . . ?
C4 C3 C8 C7 -176.80(14) . . . . ?
C6 C7 C8 C3 3.1(2) . . . . ?
C35 C7 C8 C3 -173.77(13) . . . . ?
C13 N3 C9 N2 179.69(14) . . . . ?
C13 N3 C9 C10 0.4(2) . . . . ?
C4 N2 C9 N3 8.7(2) . . . . ?
C4 N2 C9 C10 -171.95(15) . . . . ?
N3 C9 C10 C11 -0.3(3) . . . . ?
N2 C9 C10 C11 -179.65(14) . . . . ?
C9 C10 C11 C12 -0.7(2) . . . . ?
C9 C10 C11 C17 179.11(16) . . . . ?
C10 C11 C12 C13 1.5(2) . . . . ?
C17 C11 C12 C13 -178.29(16) . . . . ?
C10 C11 C12 C14 -178.68(16) . . . . ?
C17 C11 C12 C14 1.5(3) . . . . ?
C9 N3 C13 C12 0.5(2) . . . . ?
C9 N3 C13 C16 -178.79(15) . . . . ?
C11 C12 C13 N3 -1.5(3) . . . . ?
C14 C12 C13 N3 178.62(15) . . . . ?
C11 C12 C13 C16 177.88(15) . . . . ?
C14 C12 C13 C16 -1.97(19) . . . . ?
C11 C12 C14 C15 163.66(17) . . . . ?
C13 C12 C14 C15 -16.52(19) . . . . ?
C12 C14 C15 C16 28.20(17) . . . . ?
C18 O1 C16 C13 -175.10(12) . . . . ?
C18 O1 C16 C15 73.36(16) . . . . ?
N3 C13 C16 O1 80.34(19) . . . . ?
C12 C13 C16 O1 -99.08(15) . . . . ?
N3 C13 C16 C15 -160.95(16) . . . . ?
C12 C13 C16 C15 19.64(17) . . . . ?
C14 C15 C16 O1 85.25(15) . . . . ?
C14 C15 C16 C13 -29.28(16) . . . . ?
C23 N5 C19 N4 -179.76(13) . . . . ?
C23 N5 C19 C20 -0.7(2) . . . . ?
C1 N4 C19 N5 11.5(2) . . . . ?
C1 N4 C19 C20 -167.56(14) . . . . ?
N5 C19 C20 C21 -2.1(2) . . . . ?
N4 C19 C20 C21 176.99(13) . . . . ?
C19 C20 C21 C22 2.9(2) . . . . ?
C19 C20 C21 C27 -175.44(14) . . . . ?
C20 C21 C22 C23 -1.0(2) . . . . ?
C27 C21 C22 C23 177.28(14) . . . . ?
C20 C21 C22 C24 179.84(14) . . . . ?
C27 C21 C22 C24 -1.9(2) . . . . ?
C19 N5 C23 C22 2.8(2) . . . . ?
C19 N5 C23 C26 -178.12(13) . . . . ?
C21 C22 C23 N5 -1.9(2) . . . . ?
C24 C22 C23 N5 177.37(14) . . . . ?
C21 C22 C23 C26 178.87(13) . . . . ?
C24 C22 C23 C26 -1.84(17) . . . . ?
C23 C22 C24 C25 -12.91(16) . . . . ?
C21 C22 C24 C25 166.28(15) . . . . ?
C22 C24 C25 C26 22.40(15) . . . . ?
C28 O2 C26 C23 -59.89(16) . . . . ?
C28 O2 C26 C25 -172.66(12) . . . . ?
N5 C23 C26 O2 81.28(17) . . . . ?
C22 C23 C26 O2 -99.49(14) . . . . ?
N5 C23 C26 C25 -163.29(14) . . . . ?
C22 C23 C26 C25 15.93(16) . . . . ?
C24 C25 C26 O2 96.20(13) . . . . ?
C24 C25 C26 C23 -23.32(15) . . . . ?
C5 C6 C29 C30 -47.8(2) . . . . ?
C7 C6 C29 C30 136.26(15) . . . . ?
C5 C6 C29 C34 127.52(15) . . . . ?
C7 C6 C29 C34 -48.4(2) . . . . ?
C34 C29 C30 C31 1.2(2) . . . . ?
C6 C29 C30 C31 176.59(14) . . . . ?
C29 C30 C31 C32 -0.7(3) . . . . ?
C30 C31 C32 C33 -0.5(3) . . . . ?
C31 C32 C33 C34 1.2(3) . . . . ?
C32 C33 C34 C29 -0.6(2) . . . . ?
C30 C29 C34 C33 -0.6(2) . . . . ?
C6 C29 C34 C33 -176.03(14) . . . . ?
C8 C7 C35 C40 -51.3(2) . . . . ?
C6 C7 C35 C40 131.81(15) . . . . ?
C8 C7 C35 C36 125.69(15) . . . . ?
C6 C7 C35 C36 -51.2(2) . . . . ?
C40 C35 C36 C37 -0.4(2) . . . . ?
C7 C35 C36 C37 -177.52(14) . . . . ?
C35 C36 C37 C38 -0.3(2) . . . . ?
C36 C37 C38 C39 0.3(2) . . . . ?
C37 C38 C39 C40 0.3(2) . . . . ?
C38 C39 C40 C35 -1.1(2) . . . . ?
C36 C35 C40 C39 1.1(2) . . . . ?
C7 C35 C40 C39 178.16(14) . . . . ?

_diffrn_measured_fraction_theta_max 0.958
_diffrn_reflns_theta_full        27.50
_diffrn_measured_fraction_theta_full 0.999
_refine_diff_density_max         0.579
_refine_diff_density_min         -0.261
_refine_diff_density_rms         0.064

_diffrn_ambient_environment      'perfluoro polyether oil'
_diffrn_measurement_device       'three-circle diffractometer'
_diffrn_measurement_specimen_support 'polyimid foil'
_diffrn_detector                 'CCD plate'
_diffrn_detector_type            CCD-PXL-KAF2


#==end==

 
data_RR-9

_audit_creation_method           SHELXL-97
_audit_block_code                ga_ds44
_audit_block_refno               1301
_audit_update_record             'Tue Sep 18 12:03:39 CEST 2012'

_audit_block_usercomment         des482


_chemical_name_systematic        ?
_chemical_name_common            ?
_chemical_formula_moiety         ?
_chemical_formula_sum            'C30 H33 N5 O2'
_chemical_melting_point          ?

_exptl_crystal_description       irregular
_exptl_crystal_colour            red

_diffrn_ambient_temperature      100(2)
_chemical_formula_weight         495.61

loop_
_atom_type_symbol
_atom_type_description
_atom_type_scat_dispersion_real
_atom_type_scat_dispersion_imag
_atom_type_scat_source
C C 0.0033 0.0000 'International Tables Vol C Tables 4.2.6.8 and 6.1.1.4'
H H 0.0000 0.0000 'International Tables Vol C Tables 4.2.6.8 and 6.1.1.4'
N N 0.0061 0.0000 'International Tables Vol C Tables 4.2.6.8 and 6.1.1.4'
O O 0.0106 0.0000 'International Tables Vol C Tables 4.2.6.8 and 6.1.1.4'

_symmetry_cell_setting           monoclinic
_symmetry_space_group_name_H-M   'I 2'
_symmetry_int_tables_number      5

_chemical_absolute_configuration syn

loop_
_symmetry_equiv_pos_as_xyz
'x, y, z'
'-x, y, -z'
'x+1/2, y+1/2, z+1/2'
'-x+1/2, y+1/2, -z+1/2'

_cell_length_a                   13.362(6)
_cell_length_b                   12.353(6)
_cell_length_c                   15.330(8)
_cell_angle_alpha                90.00
_cell_angle_beta                 93.210(12)
_cell_angle_gamma                90.00
_cell_volume                     2526(2)
_cell_formula_units_Z            4
_cell_measurement_temperature    100(2)
_cell_measurement_reflns_used    8121
_cell_measurement_theta_min      2.25
_cell_measurement_theta_max      31.48
_exptl_crystal_size_max          0.27
_exptl_crystal_size_mid          0.16
_exptl_crystal_size_min          0.14
_exptl_crystal_density_meas      ?
_exptl_crystal_density_diffrn    1.303
_exptl_crystal_density_method    'not measured'
_exptl_crystal_F_000             1056
_exptl_absorpt_coefficient_mu    0.084

_exptl_absorpt_correction_type   multi-scan
_exptl_absorpt_correction_T_min  0.8037
_exptl_absorpt_correction_T_max  0.8623
_exptl_absorpt_process_details   
;
multi-scan from symmetry-related measurements (Blessing 1995)
SADABS (Sheldrick & Bruker AXS, 2004-2008)
;

_exptl_special_details           
; 
 ? 
;
_diffrn_radiation_probe          x-ray
_diffrn_radiation_type           MoK\a
_diffrn_radiation_wavelength     0.71073
_diffrn_source                   'fine-focus sealed tube (Mo)'
_diffrn_radiation_monochromator  graphite
_diffrn_measurement_device_type  'Bruker AXS Smart 1000'
_diffrn_measurement_method       '\f- and \w-scans'
_diffrn_detector_area_resol_mean 8.19
_diffrn_reflns_number            31824
_diffrn_reflns_av_R_equivalents  0.0420
_diffrn_reflns_av_sigmaI/netI    0.0282
_diffrn_reflns_limit_h_min       -19
_diffrn_reflns_limit_h_max       19
_diffrn_reflns_limit_k_min       -18
_diffrn_reflns_limit_k_max       18
_diffrn_reflns_limit_l_min       -22
_diffrn_reflns_limit_l_max       22
_diffrn_reflns_theta_min         2.08
_diffrn_reflns_theta_max         32.18
_reflns_number_total             4422
_reflns_number_gt                3953
_reflns_threshold_expression     >2sigma(I)
_computing_data_collection       'SMART-5.631 (Bruker AXS, 2003)'

_computing_cell_refinement       
;
SAINT 8.x (Bruker AXS, 1997-2011). Includes estimated systematic errors
 of the unit cell constants from Monte Carlo simulations.
;
_computing_data_reduction        'SAINT 8.x (Bruker AXS, 1997-2011)'
_computing_structure_solution    'SUPERFLIP (Palatinus, 2007-2009)'
_computing_structure_refinement  'SHELXL-97 (Sheldrick, 2008)'
_computing_molecular_graphics    ?
_computing_publication_material  'encifer 1.4 (CCDC, 2011)'

_refine_special_details          
; 
 Refinement of F^2^ against ALL reflections.  The weighted R-factor wR and 
 goodness of fit S are based on F^2^, conventional R-factors R are based 
 on F, with F set to zero for negative F^2^. The threshold expression of 
 F^2^ > 2sigma(F^2^) is used only for calculating R-factors(gt) etc. and is 
 not relevant to the choice of reflections for refinement.  R-factors based 
 on F^2^ are statistically about twice as large as those based on F, and R- 
 factors based on ALL data will be even larger. 
;

_refine_ls_structure_factor_coef Fsqd
_refine_ls_matrix_type           full
_refine_ls_weighting_scheme      calc
_refine_ls_weighting_details     
'calc w=1/[\s^2^(Fo^2^)+(0.0771P)^2^+0.7897P] where P=(Fo^2^+2Fc^2^)/3'
_atom_sites_solution_primary     iterative
_atom_sites_solution_secondary   difmap
_atom_sites_solution_hydrogens   mixed
_refine_ls_hydrogen_treatment    mixed
_refine_ls_extinction_method     none
_refine_ls_extinction_coef       ?
_refine_ls_abs_structure_details 'Flack H D (1983), Acta Cryst. A39, 876-881'
_refine_ls_abs_structure_Flack   .
_refine_ls_number_reflns         4422
_refine_ls_number_parameters     341
_refine_ls_number_restraints     2
_refine_ls_R_factor_all          0.0518
_refine_ls_R_factor_gt           0.0444
_refine_ls_wR_factor_ref         0.1183
_refine_ls_wR_factor_gt          0.1117
_refine_ls_goodness_of_fit_ref   1.033
_refine_ls_restrained_S_all      1.033
_refine_ls_shift/su_max          0.000
_refine_ls_shift/su_mean         0.000

loop_
_atom_site_label
_atom_site_type_symbol
_atom_site_fract_x
_atom_site_fract_y
_atom_site_fract_z
_atom_site_U_iso_or_equiv
_atom_site_adp_type
_atom_site_occupancy
_atom_site_symmetry_multiplicity
_atom_site_calc_flag
_atom_site_refinement_flags
_atom_site_disorder_assembly
_atom_site_disorder_group
O1 O 0.17482(9) 1.05201(10) 0.49706(8) 0.0174(2) Uani 1 1 d . . .
N1 N 0.0000 0.65500(16) 0.5000 0.0136(4) Uani 1 2 d SD . .
H1 H 0.0000 0.730(2) 0.5000 0.016 Uiso 1 2 d SD . .
N2 N 0.16527(11) 0.61301(12) 0.57128(10) 0.0144(3) Uani 1 1 d . . .
N3 N 0.15029(11) 0.80724(12) 0.57144(9) 0.0143(3) Uani 1 1 d . . .
C1 C 0.07984(12) 0.59150(14) 0.53297(10) 0.0122(3) Uani 1 1 d . . .
C2 C 0.04856(12) 0.47845(13) 0.51894(10) 0.0123(3) Uani 1 1 d . . .
C3 C 0.09931(13) 0.38245(14) 0.53800(11) 0.0157(3) Uani 1 1 d . . .
H3 H 0.1658 0.3826 0.5634 0.019 Uiso 1 1 calc R . .
C4 C 0.04904(14) 0.28587(13) 0.51842(12) 0.0185(3) Uani 1 1 d . . .
H4 H 0.0820 0.2189 0.5303 0.022 Uiso 1 1 calc R . .
C5 C 0.20189(12) 0.71609(13) 0.59181(11) 0.0132(3) Uani 1 1 d . . .
C6 C 0.29601(12) 0.71631(14) 0.63740(10) 0.0138(3) Uani 1 1 d . . .
H6 H 0.3302 0.6497 0.6477 0.017 Uiso 1 1 calc R . .
C7 C 0.34003(12) 0.81185(14) 0.66774(10) 0.0140(3) Uani 1 1 d . . .
C8 C 0.28646(12) 0.90663(14) 0.64760(10) 0.0139(3) Uani 1 1 d . . .
C9 C 0.19532(12) 0.89937(13) 0.59900(10) 0.0134(3) Uani 1 1 d . . .
C10 C 0.31006(13) 1.02183(15) 0.67289(11) 0.0176(3) Uani 1 1 d . . .
H10A H 0.3647 1.0512 0.6389 0.021 Uiso 1 1 calc R . .
H10B H 0.3294 1.0278 0.7360 0.021 Uiso 1 1 calc R . .
C11 C 0.21013(14) 1.08084(15) 0.65009(12) 0.0205(3) Uani 1 1 d . . .
H11A H 0.1711 1.0885 0.7028 0.025 Uiso 1 1 calc R . .
H11B H 0.2228 1.1539 0.6265 0.025 Uiso 1 1 calc R . .
C12 C 0.15271(13) 1.01112(13) 0.58123(11) 0.0162(3) Uani 1 1 d . . .
H12 H 0.0790 1.0128 0.5894 0.019 Uiso 1 1 calc R . .
C13 C 0.43830(13) 0.81252(17) 0.72020(11) 0.0191(3) Uani 1 1 d . . .
H13A H 0.4271 0.8325 0.7807 0.029 Uiso 1 1 calc R . .
H13B H 0.4834 0.8652 0.6952 0.029 Uiso 1 1 calc R . .
H13C H 0.4685 0.7403 0.7189 0.029 Uiso 1 1 calc R . .
C14 C 0.13799(12) 0.98518(15) 0.42570(11) 0.0176(3) Uani 1 1 d . . .
H14A H 0.0731 0.9522 0.4393 0.021 Uiso 1 1 calc R . .
H14B H 0.1862 0.9263 0.4156 0.021 Uiso 1 1 calc R . .
C15 C 0.12464(15) 1.05549(18) 0.34530(13) 0.0250(4) Uani 1 1 d . . .
H15A H 0.0993 1.0114 0.2957 0.038 Uiso 1 1 calc R . .
H15B H 0.1893 1.0873 0.3322 0.038 Uiso 1 1 calc R . .
H15C H 0.0767 1.1134 0.3559 0.038 Uiso 1 1 calc R . .
O2 O 0.44238(9) 0.37658(12) 0.33670(9) 0.0213(3) Uani 1 1 d . . .
N51 N 0.5000 0.74991(16) 0.5000 0.0124(3) Uani 1 2 d SD . .
H51 H 0.5000 0.676(2) 0.5000 0.015 Uiso 1 2 d SD . .
N52 N 0.34254(10) 0.79123(11) 0.41591(9) 0.0133(3) Uani 1 1 d . . .
N53 N 0.36147(11) 0.59738(12) 0.41382(9) 0.0141(3) Uani 1 1 d . . .
C51 C 0.42449(12) 0.81406(13) 0.45999(10) 0.0119(3) Uani 1 1 d . . .
C52 C 0.45439(11) 0.92714(13) 0.47579(10) 0.0119(3) Uani 1 1 d . . .
C53 C 0.40717(12) 1.02295(14) 0.45061(11) 0.0149(3) Uani 1 1 d . . .
H53 H 0.3449 1.0228 0.4175 0.018 Uiso 1 1 calc R . .
C54 C 0.45419(13) 1.11934(14) 0.47555(12) 0.0184(4) Uani 1 1 d . . .
H54 H 0.4236 1.1863 0.4591 0.022 Uiso 1 1 calc R . .
C55 C 0.30750(12) 0.68780(13) 0.39521(10) 0.0124(3) Uani 1 1 d . . .
C56 C 0.21162(12) 0.68585(14) 0.35220(11) 0.0139(3) Uani 1 1 d . . .
H56 H 0.1770 0.7520 0.3409 0.017 Uiso 1 1 calc R . .
C57 C 0.16683(12) 0.58913(14) 0.32611(10) 0.0133(3) Uani 1 1 d . . .
C58 C 0.22310(12) 0.49546(14) 0.34440(10) 0.0136(3) Uani 1 1 d . . .
C59 C 0.31737(12) 0.50443(13) 0.38693(10) 0.0136(3) Uani 1 1 d . . .
C60 C 0.19779(13) 0.37946(14) 0.32321(12) 0.0174(3) Uani 1 1 d . . .
H60A H 0.1996 0.3656 0.2597 0.021 Uiso 1 1 calc R . .
H60B H 0.1306 0.3603 0.3425 0.021 Uiso 1 1 calc R . .
C61 C 0.28036(13) 0.31526(14) 0.37476(12) 0.0181(3) Uani 1 1 d . . .
H61A H 0.2542 0.2851 0.4288 0.022 Uiso 1 1 calc R . .
H61B H 0.3041 0.2547 0.3390 0.022 Uiso 1 1 calc R . .
C62 C 0.36642(13) 0.39452(14) 0.39718(11) 0.0164(3) Uani 1 1 d . . .
H62 H 0.3938 0.3835 0.4586 0.020 Uiso 1 1 calc R . .
C63 C 0.06420(12) 0.58559(16) 0.28080(12) 0.0185(3) Uani 1 1 d . . .
H63A H 0.0683 0.5522 0.2231 0.028 Uiso 1 1 calc R . .
H63B H 0.0380 0.6594 0.2740 0.028 Uiso 1 1 calc R . .
H63C H 0.0193 0.5429 0.3157 0.028 Uiso 1 1 calc R . .
C64 C 0.53128(13) 0.43958(17) 0.35263(14) 0.0243(4) Uani 1 1 d . . .
H64A H 0.5394 0.4590 0.4153 0.029 Uiso 1 1 calc R . .
H64B H 0.5268 0.5072 0.3180 0.029 Uiso 1 1 calc R . .
C65 C 0.61931(16) 0.3733(3) 0.32669(18) 0.0387(5) Uani 1 1 d . . .
H65A H 0.6093 0.3520 0.2652 0.058 Uiso 1 1 calc R . .
H65B H 0.6252 0.3083 0.3633 0.058 Uiso 1 1 calc R . .
H65C H 0.6807 0.4163 0.3346 0.058 Uiso 1 1 calc R . .

loop_
_atom_site_aniso_label
_atom_site_aniso_U_11
_atom_site_aniso_U_22
_atom_site_aniso_U_33
_atom_site_aniso_U_23
_atom_site_aniso_U_13
_atom_site_aniso_U_12
O1 0.0205(6) 0.0130(5) 0.0183(6) -0.0013(4) -0.0034(4) 0.0001(4)
N1 0.0138(9) 0.0095(8) 0.0171(9) 0.000 -0.0024(7) 0.000
N2 0.0148(6) 0.0124(6) 0.0158(6) -0.0001(5) -0.0008(5) -0.0021(5)
N3 0.0145(6) 0.0124(6) 0.0158(6) -0.0007(5) -0.0006(5) -0.0006(5)
C1 0.0132(7) 0.0106(7) 0.0126(6) -0.0001(5) -0.0005(5) -0.0004(5)
C2 0.0139(7) 0.0096(7) 0.0134(7) 0.0003(5) -0.0005(5) 0.0015(5)
C3 0.0171(7) 0.0114(7) 0.0184(7) 0.0000(6) -0.0016(6) 0.0013(6)
C4 0.0226(9) 0.0097(7) 0.0229(8) 0.0008(6) -0.0018(7) 0.0021(6)
C5 0.0132(7) 0.0125(7) 0.0137(6) 0.0003(6) -0.0008(5) -0.0018(6)
C6 0.0137(7) 0.0131(7) 0.0143(7) 0.0016(6) -0.0017(5) -0.0011(6)
C7 0.0127(7) 0.0157(7) 0.0133(6) 0.0014(6) -0.0009(5) -0.0017(6)
C8 0.0146(7) 0.0130(7) 0.0138(7) -0.0013(6) -0.0011(5) -0.0018(5)
C9 0.0139(7) 0.0120(7) 0.0142(7) -0.0007(6) -0.0010(5) -0.0005(5)
C10 0.0188(7) 0.0148(8) 0.0186(7) -0.0031(6) -0.0038(6) -0.0035(6)
C11 0.0238(8) 0.0157(8) 0.0213(8) -0.0064(6) -0.0042(6) 0.0009(6)
C12 0.0165(7) 0.0128(7) 0.0190(7) -0.0018(6) -0.0016(6) 0.0017(6)
C13 0.0159(7) 0.0220(8) 0.0187(7) 0.0006(7) -0.0051(6) -0.0024(7)
C14 0.0156(7) 0.0168(7) 0.0201(8) -0.0036(6) -0.0027(6) 0.0016(6)
C15 0.0247(9) 0.0302(10) 0.0198(8) 0.0007(7) -0.0016(7) -0.0005(7)
O2 0.0166(6) 0.0185(6) 0.0289(7) -0.0032(5) 0.0017(5) 0.0009(5)
N51 0.0121(8) 0.0084(8) 0.0164(8) 0.000 -0.0018(6) 0.000
N52 0.0122(6) 0.0103(6) 0.0170(6) -0.0013(5) -0.0015(5) -0.0017(5)
N53 0.0148(6) 0.0113(6) 0.0160(6) -0.0007(5) -0.0012(5) -0.0002(5)
C51 0.0118(6) 0.0096(6) 0.0142(6) 0.0005(6) -0.0004(5) 0.0005(5)
C52 0.0126(7) 0.0101(7) 0.0128(7) -0.0004(5) -0.0005(6) -0.0017(5)
C53 0.0137(7) 0.0131(7) 0.0175(7) 0.0010(6) -0.0025(6) 0.0001(6)
C54 0.0197(8) 0.0116(8) 0.0234(9) 0.0011(6) -0.0035(7) 0.0031(6)
C55 0.0126(7) 0.0109(7) 0.0136(7) -0.0007(5) -0.0008(5) -0.0014(5)
C56 0.0131(7) 0.0128(7) 0.0156(7) -0.0002(6) -0.0016(5) 0.0001(5)
C57 0.0123(6) 0.0148(7) 0.0127(7) -0.0006(6) -0.0017(5) -0.0008(6)
C58 0.0149(7) 0.0124(7) 0.0133(7) -0.0004(6) -0.0004(5) -0.0012(6)
C59 0.0149(7) 0.0115(7) 0.0142(6) -0.0007(5) -0.0011(5) -0.0008(6)
C60 0.0180(7) 0.0122(7) 0.0215(8) -0.0018(6) -0.0039(6) -0.0023(6)
C61 0.0196(8) 0.0103(7) 0.0240(8) -0.0005(6) -0.0014(6) -0.0021(6)
C62 0.0176(7) 0.0115(7) 0.0198(7) 0.0008(6) -0.0032(6) 0.0006(6)
C63 0.0134(7) 0.0206(9) 0.0210(8) -0.0019(7) -0.0046(6) -0.0010(6)
C64 0.0166(8) 0.0263(9) 0.0294(9) 0.0062(8) -0.0039(7) -0.0004(7)
C65 0.0214(10) 0.0493(15) 0.0461(13) 0.0001(12) 0.0089(9) 0.0039(10)

_geom_special_details            
; 
 All esds (except the esd in the dihedral angle between two l.s. planes) 
 are estimated using the full covariance matrix.  The cell esds are taken 
 into account individually in the estimation of esds in distances, angles 
 and torsion angles; correlations between esds in cell parameters are only 
 used when they are defined by crystal symmetry.  An approximate (isotropic) 
 treatment of cell esds is used for estimating esds involving l.s. planes. 
;

loop_
_geom_bond_atom_site_label_1
_geom_bond_atom_site_label_2
_geom_bond_distance
_geom_bond_site_symmetry_2
_geom_bond_publ_flag
O1 C12 1.432(2) . ?
O1 C14 1.435(2) . ?
N1 C1 1.396(2) 2_556 ?
N1 C1 1.396(2) . ?
N1 H1 0.92(3) . ?
N2 C1 1.282(2) . ?
N2 C5 1.394(2) . ?
N3 C9 1.344(2) . ?
N3 C5 1.348(2) . ?
C1 C2 1.470(2) . ?
C2 C3 1.389(2) . ?
C2 C2 1.392(3) 2_556 ?
C3 C4 1.394(2) . ?
C3 H3 0.9500 . ?
C4 C4 1.398(4) 2_556 ?
C4 H4 0.9500 . ?
C5 C6 1.404(2) . ?
C6 C7 1.387(2) . ?
C6 H6 0.9500 . ?
C7 C8 1.398(2) . ?
C7 C13 1.501(2) . ?
C8 C9 1.394(2) . ?
C8 C10 1.504(2) . ?
C9 C12 1.512(2) . ?
C10 C11 1.544(3) . ?
C10 H10A 0.9900 . ?
C10 H10B 0.9900 . ?
C11 C12 1.534(2) . ?
C11 H11A 0.9900 . ?
C11 H11B 0.9900 . ?
C12 H12 1.0000 . ?
C13 H13A 0.9800 . ?
C13 H13B 0.9800 . ?
C13 H13C 0.9800 . ?
C14 C15 1.510(3) . ?
C14 H14A 0.9900 . ?
C14 H14B 0.9900 . ?
C15 H15A 0.9800 . ?
C15 H15B 0.9800 . ?
C15 H15C 0.9800 . ?
O2 C64 1.430(2) . ?
O2 C62 1.430(2) . ?
N51 C51 1.3975(19) . ?
N51 C51 1.397(2) 2_656 ?
N51 H51 0.92(2) . ?
N52 C51 1.285(2) . ?
N52 C55 1.391(2) . ?
N53 C59 1.345(2) . ?
N53 C55 1.351(2) . ?
C51 C52 1.469(2) . ?
C52 C53 1.386(2) . ?
C52 C52 1.391(3) 2_656 ?
C53 C54 1.390(2) . ?
C53 H53 0.9500 . ?
C54 C54 1.399(4) 2_656 ?
C54 H54 0.9500 . ?
C55 C56 1.408(2) . ?
C56 C57 1.385(2) . ?
C56 H56 0.9500 . ?
C57 C58 1.400(2) . ?
C57 C63 1.503(2) . ?
C58 C59 1.390(2) . ?
C58 C60 1.504(3) . ?
C59 C62 1.512(2) . ?
C60 C61 1.541(2) . ?
C60 H60A 0.9900 . ?
C60 H60B 0.9900 . ?
C61 C62 1.535(2) . ?
C61 H61A 0.9900 . ?
C61 H61B 0.9900 . ?
C62 H62 1.0000 . ?
C63 H63A 0.9800 . ?
C63 H63B 0.9800 . ?
C63 H63C 0.9800 . ?
C64 C65 1.505(3) . ?
C64 H64A 0.9900 . ?
C64 H64B 0.9900 . ?
C65 H65A 0.9800 . ?
C65 H65B 0.9800 . ?
C65 H65C 0.9800 . ?

loop_
_geom_angle_atom_site_label_1
_geom_angle_atom_site_label_2
_geom_angle_atom_site_label_3
_geom_angle
_geom_angle_site_symmetry_1
_geom_angle_site_symmetry_3
_geom_angle_publ_flag
C12 O1 C14 113.88(13) . . ?
C1 N1 C1 111.6(2) 2_556 . ?
C1 N1 H1 124.19(10) 2_556 . ?
C1 N1 H1 124.19(10) . . ?
C1 N2 C5 125.81(15) . . ?
C9 N3 C5 114.85(13) . . ?
N2 C1 N1 133.82(17) . . ?
N2 C1 C2 120.16(15) . . ?
N1 C1 C2 105.99(14) . . ?
C3 C2 C2 121.37(10) . 2_556 ?
C3 C2 C1 130.45(15) . . ?
C2 C2 C1 108.17(8) 2_556 . ?
C2 C3 C4 117.50(15) . . ?
C2 C3 H3 121.2 . . ?
C4 C3 H3 121.2 . . ?
C3 C4 C4 121.12(10) . 2_556 ?
C3 C4 H4 119.4 . . ?
C4 C4 H4 119.4 2_556 . ?
N3 C5 N2 122.85(14) . . ?
N3 C5 C6 123.09(15) . . ?
N2 C5 C6 114.04(15) . . ?
C7 C6 C5 121.31(16) . . ?
C7 C6 H6 119.3 . . ?
C5 C6 H6 119.3 . . ?
C6 C7 C8 115.87(14) . . ?
C6 C7 C13 121.74(16) . . ?
C8 C7 C13 122.38(16) . . ?
C9 C8 C7 119.03(15) . . ?
C9 C8 C10 111.28(15) . . ?
C7 C8 C10 129.67(15) . . ?
N3 C9 C8 125.76(15) . . ?
N3 C9 C12 123.98(14) . . ?
C8 C9 C12 110.26(14) . . ?
C8 C10 C11 102.84(13) . . ?
C8 C10 H10A 111.2 . . ?
C11 C10 H10A 111.2 . . ?
C8 C10 H10B 111.2 . . ?
C11 C10 H10B 111.2 . . ?
H10A C10 H10B 109.1 . . ?
C12 C11 C10 106.47(14) . . ?
C12 C11 H11A 110.4 . . ?
C10 C11 H11A 110.4 . . ?
C12 C11 H11B 110.4 . . ?
C10 C11 H11B 110.4 . . ?
H11A C11 H11B 108.6 . . ?
O1 C12 C9 112.94(14) . . ?
O1 C12 C11 107.56(15) . . ?
C9 C12 C11 102.70(13) . . ?
O1 C12 H12 111.1 . . ?
C9 C12 H12 111.1 . . ?
C11 C12 H12 111.1 . . ?
C7 C13 H13A 109.5 . . ?
C7 C13 H13B 109.5 . . ?
H13A C13 H13B 109.5 . . ?
C7 C13 H13C 109.5 . . ?
H13A C13 H13C 109.5 . . ?
H13B C13 H13C 109.5 . . ?
O1 C14 C15 108.13(15) . . ?
O1 C14 H14A 110.1 . . ?
C15 C14 H14A 110.1 . . ?
O1 C14 H14B 110.1 . . ?
C15 C14 H14B 110.1 . . ?
H14A C14 H14B 108.4 . . ?
C14 C15 H15A 109.5 . . ?
C14 C15 H15B 109.5 . . ?
H15A C15 H15B 109.5 . . ?
C14 C15 H15C 109.5 . . ?
H15A C15 H15C 109.5 . . ?
H15B C15 H15C 109.5 . . ?
C64 O2 C62 114.72(15) . . ?
C51 N51 C51 110.9(2) . 2_656 ?
C51 N51 H51 124.54(10) . . ?
C51 N51 H51 124.54(10) 2_656 . ?
C51 N52 C55 125.96(15) . . ?
C59 N53 C55 114.93(13) . . ?
N52 C51 N51 132.78(16) . . ?
N52 C51 C52 120.74(14) . . ?
N51 C51 C52 106.48(14) . . ?
C53 C52 C52 121.35(9) . 2_656 ?
C53 C52 C51 130.59(14) . . ?
C52 C52 C51 108.06(8) 2_656 . ?
C52 C53 C54 117.59(15) . . ?
C52 C53 H53 121.2 . . ?
C54 C53 H53 121.2 . . ?
C53 C54 C54 121.06(10) . 2_656 ?
C53 C54 H54 119.5 . . ?
C54 C54 H54 119.5 2_656 . ?
N53 C55 N52 122.83(14) . . ?
N53 C55 C56 123.07(15) . . ?
N52 C55 C56 114.10(14) . . ?
C57 C56 C55 121.14(15) . . ?
C57 C56 H56 119.4 . . ?
C55 C56 H56 119.4 . . ?
C56 C57 C58 115.89(14) . . ?
C56 C57 C63 121.80(15) . . ?
C58 C57 C63 122.31(15) . . ?
C59 C58 C57 119.38(15) . . ?
C59 C58 C60 111.36(15) . . ?
C57 C58 C60 129.25(15) . . ?
N53 C59 C58 125.58(15) . . ?
N53 C59 C62 123.70(14) . . ?
C58 C59 C62 110.69(14) . . ?
C58 C60 C61 103.52(13) . . ?
C58 C60 H60A 111.1 . . ?
C61 C60 H60A 111.1 . . ?
C58 C60 H60B 111.1 . . ?
C61 C60 H60B 111.1 . . ?
H60A C60 H60B 109.0 . . ?
C62 C61 C60 107.01(14) . . ?
C62 C61 H61A 110.3 . . ?
C60 C61 H61A 110.3 . . ?
C62 C61 H61B 110.3 . . ?
C60 C61 H61B 110.3 . . ?
H61A C61 H61B 108.6 . . ?
O2 C62 C59 113.02(14) . . ?
O2 C62 C61 107.83(14) . . ?
C59 C62 C61 103.57(14) . . ?
O2 C62 H62 110.7 . . ?
C59 C62 H62 110.7 . . ?
C61 C62 H62 110.7 . . ?
C57 C63 H63A 109.5 . . ?
C57 C63 H63B 109.5 . . ?
H63A C63 H63B 109.5 . . ?
C57 C63 H63C 109.5 . . ?
H63A C63 H63C 109.5 . . ?
H63B C63 H63C 109.5 . . ?
O2 C64 C65 108.24(18) . . ?
O2 C64 H64A 110.1 . . ?
C65 C64 H64A 110.1 . . ?
O2 C64 H64B 110.1 . . ?
C65 C64 H64B 110.1 . . ?
H64A C64 H64B 108.4 . . ?
C64 C65 H65A 109.5 . . ?
C64 C65 H65B 109.5 . . ?
H65A C65 H65B 109.5 . . ?
C64 C65 H65C 109.5 . . ?
H65A C65 H65C 109.5 . . ?
H65B C65 H65C 109.5 . . ?

loop_
_geom_torsion_atom_site_label_1
_geom_torsion_atom_site_label_2
_geom_torsion_atom_site_label_3
_geom_torsion_atom_site_label_4
_geom_torsion
_geom_torsion_site_symmetry_1
_geom_torsion_site_symmetry_2
_geom_torsion_site_symmetry_3
_geom_torsion_site_symmetry_4
_geom_torsion_publ_flag
C5 N2 C1 N1 0.6(3) . . . . ?
C5 N2 C1 C2 -177.10(15) . . . . ?
C1 N1 C1 N2 -177.3(2) 2_556 . . . ?
C1 N1 C1 C2 0.64(8) 2_556 . . . ?
N2 C1 C2 C3 -2.8(3) . . . . ?
N1 C1 C2 C3 178.89(16) . . . . ?
N2 C1 C2 C2 176.57(17) . . . 2_556 ?
N1 C1 C2 C2 -1.7(2) . . . 2_556 ?
C2 C2 C3 C4 -0.5(3) 2_556 . . . ?
C1 C2 C3 C4 178.79(17) . . . . ?
C2 C3 C4 C4 -0.5(3) . . . 2_556 ?
C9 N3 C5 N2 177.68(15) . . . . ?
C9 N3 C5 C6 -0.7(2) . . . . ?
C1 N2 C5 N3 -1.3(3) . . . . ?
C1 N2 C5 C6 177.24(15) . . . . ?
N3 C5 C6 C7 2.8(3) . . . . ?
N2 C5 C6 C7 -175.74(15) . . . . ?
C5 C6 C7 C8 -2.0(2) . . . . ?
C5 C6 C7 C13 177.05(15) . . . . ?
C6 C7 C8 C9 -0.6(2) . . . . ?
C13 C7 C8 C9 -179.60(15) . . . . ?
C6 C7 C8 C10 177.38(17) . . . . ?
C13 C7 C8 C10 -1.6(3) . . . . ?
C5 N3 C9 C8 -2.1(2) . . . . ?
C5 N3 C9 C12 178.11(16) . . . . ?
C7 C8 C9 N3 2.8(2) . . . . ?
C10 C8 C9 N3 -175.52(16) . . . . ?
C7 C8 C9 C12 -177.38(14) . . . . ?
C10 C8 C9 C12 4.30(19) . . . . ?
C9 C8 C10 C11 11.76(19) . . . . ?
C7 C8 C10 C11 -166.33(17) . . . . ?
C8 C10 C11 C12 -22.92(18) . . . . ?
C14 O1 C12 C9 58.82(18) . . . . ?
C14 O1 C12 C11 171.41(13) . . . . ?
N3 C9 C12 O1 -83.14(19) . . . . ?
C8 C9 C12 O1 97.04(16) . . . . ?
N3 C9 C12 C11 161.32(16) . . . . ?
C8 C9 C12 C11 -18.50(18) . . . . ?
C10 C11 C12 O1 -94.12(16) . . . . ?
C10 C11 C12 C9 25.25(18) . . . . ?
C12 O1 C14 C15 155.63(14) . . . . ?
C55 N52 C51 N51 -0.8(3) . . . . ?
C55 N52 C51 C52 178.57(15) . . . . ?
C51 N51 C51 N52 179.5(2) 2_656 . . . ?
C51 N51 C51 C52 0.03(8) 2_656 . . . ?
N52 C51 C52 C53 0.4(3) . . . . ?
N51 C51 C52 C53 179.90(15) . . . . ?
N52 C51 C52 C52 -179.59(16) . . . 2_656 ?
N51 C51 C52 C52 -0.1(2) . . . 2_656 ?
C52 C52 C53 C54 -0.1(3) 2_656 . . . ?
C51 C52 C53 C54 179.98(17) . . . . ?
C52 C53 C54 C54 -0.1(3) . . . 2_656 ?
C59 N53 C55 N52 -178.14(15) . . . . ?
C59 N53 C55 C56 1.0(2) . . . . ?
C51 N52 C55 N53 -5.6(2) . . . . ?
C51 N52 C55 C56 175.17(15) . . . . ?
N53 C55 C56 C57 -0.1(2) . . . . ?
N52 C55 C56 C57 179.08(14) . . . . ?
C55 C56 C57 C58 -0.6(2) . . . . ?
C55 C56 C57 C63 179.49(15) . . . . ?
C56 C57 C58 C59 0.5(2) . . . . ?
C63 C57 C58 C59 -179.66(15) . . . . ?
C56 C57 C58 C60 -178.41(16) . . . . ?
C63 C57 C58 C60 1.5(3) . . . . ?
C55 N53 C59 C58 -1.2(2) . . . . ?
C55 N53 C59 C62 177.03(15) . . . . ?
C57 C58 C59 N53 0.5(3) . . . . ?
C60 C58 C59 N53 179.54(15) . . . . ?
C57 C58 C59 C62 -177.92(14) . . . . ?
C60 C58 C59 C62 1.1(2) . . . . ?
C59 C58 C60 C61 10.98(19) . . . . ?
C57 C58 C60 C61 -170.09(16) . . . . ?
C58 C60 C61 C62 -18.55(18) . . . . ?
C64 O2 C62 C59 70.19(18) . . . . ?
C64 O2 C62 C61 -175.95(14) . . . . ?
N53 C59 C62 O2 -74.8(2) . . . . ?
C58 C59 C62 O2 103.63(16) . . . . ?
N53 C59 C62 C61 168.78(15) . . . . ?
C58 C59 C62 C61 -12.78(18) . . . . ?
C60 C61 C62 O2 -100.86(16) . . . . ?
C60 C61 C62 C59 19.16(17) . . . . ?
C62 O2 C64 C65 146.40(18) . . . . ?

_diffrn_measured_fraction_theta_max 0.954
_diffrn_reflns_theta_full        27.50
_diffrn_measured_fraction_theta_full 1.000
_refine_diff_density_max         0.669
_refine_diff_density_min         -0.290
_refine_diff_density_rms         0.065

_diffrn_ambient_environment      'perfluoro polyether oil'
_diffrn_measurement_device       'three-circle diffractometer'
_diffrn_measurement_specimen_support 'polyimid foil'
_diffrn_detector                 'CCD plate'
_diffrn_detector_type            CCD-PXL-KAF2


#==end==

 
data_SS-10
_audit_creation_method           
;
CrysAlisPro, Oxford Diffraction Ltd.,
Version 1.171.35.15 (release 03-08-2011 CrysAlis171 .NET)
(compiled Aug  3 2011,13:03:54)
;
_audit_block_code                ga_ds45a
_audit_block_refno               1355
_audit_update_record             'Tue Nov  8 13:59:31 CET 2011'


_chemical_name_systematic        ?
_chemical_name_common            ?
_chemical_formula_moiety         ?
_chemical_formula_sum            'C33 H39 Cl2 N5 O2'
_chemical_melting_point          ?

_exptl_crystal_description       plate
_exptl_crystal_colour            yellow
_diffrn_ambient_temperature      119.9(3)
_chemical_formula_weight         608.59

loop_
_atom_type_symbol
_atom_type_description
_atom_type_scat_dispersion_real
_atom_type_scat_dispersion_imag
_atom_type_scat_source
C C 0.0181 0.0091 'International Tables Vol C Tables 4.2.6.8 and 6.1.1.4'
H H 0.0000 0.0000 'International Tables Vol C Tables 4.2.6.8 and 6.1.1.4'
Cl Cl 0.3639 0.7018 'International Tables Vol C Tables 4.2.6.8 and 6.1.1.4'
N N 0.0311 0.0180 'International Tables Vol C Tables 4.2.6.8 and 6.1.1.4'
O O 0.0492 0.0322 'International Tables Vol C Tables 4.2.6.8 and 6.1.1.4'

_symmetry_cell_setting           triclinic
_symmetry_space_group_name_H-M   'P 1'
_symmetry_int_tables_number      1
_chemical_absolute_configuration ad

loop_
_symmetry_equiv_pos_as_xyz
'x, y, z'

_cell_length_a                   8.04522(17)
_cell_length_b                   13.3300(3)
_cell_length_c                   15.0284(3)
_cell_angle_alpha                89.4843(17)
_cell_angle_beta                 74.9208(19)
_cell_angle_gamma                88.9335(17)
_cell_volume                     1555.91(6)
_cell_formula_units_Z            2
_cell_measurement_temperature    119.9(3)
_cell_measurement_reflns_used    40770
_cell_measurement_theta_min      4.4912
_cell_measurement_theta_max      71.8716
_exptl_crystal_size_max          0.25
_exptl_crystal_size_mid          0.18
_exptl_crystal_size_min          0.06
_exptl_crystal_density_meas      ?
_exptl_crystal_density_diffrn    1.299
_exptl_crystal_density_method    'not measured'
_exptl_crystal_F_000             644
_exptl_absorpt_coefficient_mu    2.178
_exptl_absorpt_correction_type   multi-scan
_exptl_absorpt_correction_T_min  0.88175
_exptl_absorpt_correction_T_max  1.00000
_exptl_absorpt_process_details   
;
CrysAlisPro, Agilent Technologies,
Version 1.171.35.15 (release 03-08-2011 CrysAlis171 .NET)
(compiled Aug  3 2011,13:03:54)
Empirical absorption correction using spherical harmonics,
 implemented in SCALE3 ABSPACK scaling algorithm.
;

_exptl_special_details           
; 
 ? 
;
_diffrn_radiation_probe          x-ray
_diffrn_radiation_type           'Cu K\a'
_diffrn_radiation_wavelength     1.5418
_diffrn_source                   'Agilent SuperNova (Cu) X-ray Source'
_diffrn_radiation_monochromator  mirror
_diffrn_measurement_device_type  'Agilent SuperNova, Dual, Cu at zero, Eos'
_diffrn_measurement_method       '\w scans'
_diffrn_detector_area_resol_mean 15.9241
_diffrn_reflns_number            46907
_diffrn_reflns_av_R_equivalents  0.0427
_diffrn_reflns_av_sigmaI/netI    0.0292
_diffrn_reflns_limit_h_min       -9
_diffrn_reflns_limit_h_max       9
_diffrn_reflns_limit_k_min       -16
_diffrn_reflns_limit_k_max       16
_diffrn_reflns_limit_l_min       -17
_diffrn_reflns_limit_l_max       18
_diffrn_reflns_theta_min         4.4912
_diffrn_reflns_theta_max         71.8716
_reflns_number_total             10781
_reflns_number_gt                10752
_reflns_threshold_expression     >2sigma(I)
_computing_data_collection       
;
CrysAlisPro, Agilent Technologies,
Version 1.171.35.15 (release 03-08-2011 CrysAlis171 .NET)
(compiled Aug  3 2011,13:03:54)
;
_computing_cell_refinement       
;
CrysAlisPro, Agilent Technologies,
Version 1.171.35.15 (release 03-08-2011 CrysAlis171 .NET)
(compiled Aug  3 2011,13:03:54)
;
_computing_data_reduction        
;
CrysAlisPro, Agilent Technologies,
Version 1.171.35.15 (release 03-08-2011 CrysAlis171 .NET)
(compiled Aug  3 2011,13:03:54)
;
_computing_structure_solution    'SUPERFLIP (Palatinus, 2007-2009)'
_computing_structure_refinement  'SHELXL-97 (Sheldrick, 1997)'
_computing_molecular_graphics    ?
_computing_publication_material  'SHELXL-97 (Sheldrick, 1997)'

_refine_special_details          
; 
 Refinement of F^2^ against ALL reflections.  The weighted R-factor wR and 
 goodness of fit S are based on F^2^, conventional R-factors R are based 
 on F, with F set to zero for negative F^2^. The threshold expression of 
 F^2^ > 2sigma(F^2^) is used only for calculating R-factors(gt) etc. and is 
 not relevant to the choice of reflections for refinement.  R-factors based 
 on F^2^ are statistically about twice as large as those based on F, and R- 
 factors based on ALL data will be even larger. 
;

_refine_ls_structure_factor_coef Fsqd
_refine_ls_matrix_type           full
_refine_ls_weighting_scheme      calc
_refine_ls_weighting_details     
'calc w=1/[\s^2^(Fo^2^)+(0.0772P)^2^+0.7862P] where P=(Fo^2^+2Fc^2^)/3'
_atom_sites_solution_primary     dual
_atom_sites_solution_secondary   difmap
_atom_sites_solution_hydrogens   geom
_refine_ls_hydrogen_treatment    mixed
_refine_ls_extinction_method     none
_refine_ls_extinction_coef       ?
_refine_ls_abs_structure_details 'Flack H D (1983), Acta Cryst. A39, 876-881'
_refine_ls_abs_structure_Flack   0.041(10)
_refine_ls_number_reflns         10781
_refine_ls_number_parameters     776
_refine_ls_number_restraints     3
_refine_ls_R_factor_all          0.0476
_refine_ls_R_factor_gt           0.0475
_refine_ls_wR_factor_ref         0.1198
_refine_ls_wR_factor_gt          0.1198
_refine_ls_goodness_of_fit_ref   1.013
_refine_ls_restrained_S_all      1.013
_refine_ls_shift/su_max          0.000
_refine_ls_shift/su_mean         0.000

loop_
_atom_site_label
_atom_site_type_symbol
_atom_site_fract_x
_atom_site_fract_y
_atom_site_fract_z
_atom_site_U_iso_or_equiv
_atom_site_adp_type
_atom_site_occupancy
_atom_site_symmetry_multiplicity
_atom_site_calc_flag
_atom_site_refinement_flags
_atom_site_disorder_assembly
_atom_site_disorder_group
Cl11 Cl 0.18322(13) 0.30719(6) 0.69736(7) 0.0627(3) Uani 1 1 d . . .
Cl12 Cl 0.44404(9) 0.31948(5) 0.79825(5) 0.04232(17) Uani 1 1 d . . .
C91 C 0.2310(4) 0.3525(2) 0.7970(2) 0.0361(6) Uani 1 1 d . . .
H91A H 0.1497 0.3241 0.8522 0.043 Uiso 1 1 calc R . .
H91B H 0.2167 0.4264 0.7993 0.043 Uiso 1 1 calc R . .
Cl21 Cl 0.51398(9) 0.76892(6) 0.26115(6) 0.0496(2) Uani 1 1 d . . .
Cl22 Cl 0.66437(17) 0.76410(7) 0.41736(8) 0.0751(3) Uani 1 1 d . . .
C92 C 0.7054(4) 0.7513(3) 0.2959(3) 0.0533(9) Uani 1 1 d . . .
H92A H 0.7907 0.8015 0.2649 0.064 Uiso 1 1 calc R . .
H92B H 0.7544 0.6837 0.2774 0.064 Uiso 1 1 calc R . .
O1 O -0.2813(2) 0.97723(13) 0.75211(14) 0.0327(4) Uani 1 1 d . . .
O2 O 0.2954(3) 0.94043(15) 0.6160(2) 0.0554(7) Uani 1 1 d . . .
N1 N 0.0527(2) 0.73589(14) 0.90301(14) 0.0188(4) Uani 1 1 d . . .
H1 H 0.021(4) 0.779(2) 0.869(2) 0.023 Uiso 1 1 d . . .
N2 N -0.0742(2) 0.81925(14) 1.04915(14) 0.0202(4) Uani 1 1 d . . .
N3 N -0.1165(2) 0.91385(14) 0.92102(14) 0.0199(4) Uani 1 1 d . . .
N4 N 0.1980(2) 0.60687(15) 0.79597(14) 0.0230(4) Uani 1 1 d . . .
N5 N 0.1657(3) 0.75133(15) 0.70630(14) 0.0260(4) Uani 1 1 d . . .
C1 C 0.1459(3) 0.64698(16) 0.87581(17) 0.0197(4) Uani 1 1 d . . .
C2 C 0.1721(3) 0.60150(16) 0.96122(16) 0.0186(4) Uani 1 1 d . . .
C3 C 0.0945(3) 0.66436(16) 1.03437(16) 0.0183(4) Uani 1 1 d . . .
C4 C 0.0134(3) 0.74923(16) 0.99797(16) 0.0177(4) Uani 1 1 d . . .
C5 C 0.2568(3) 0.51420(17) 0.97581(17) 0.0217(5) Uani 1 1 d . . .
H5 H 0.3085 0.4715 0.9256 0.026 Uiso 1 1 calc R . .
C6 C 0.2660(3) 0.48921(16) 1.06463(17) 0.0212(5) Uani 1 1 d . . .
C7 C 0.1926(3) 0.55474(17) 1.13882(17) 0.0216(5) Uani 1 1 d . . .
C8 C 0.1055(3) 0.64227(17) 1.12258(17) 0.0210(5) Uani 1 1 d . . .
H8 H 0.0544 0.6861 1.1720 0.025 Uiso 1 1 calc R . .
C9 C -0.1470(3) 0.90051(16) 1.01243(17) 0.0197(4) Uani 1 1 d . . .
C10 C -0.2480(3) 0.96804(17) 1.07642(18) 0.0229(5) Uani 1 1 d . . .
H10 H -0.2673 0.9551 1.1405 0.027 Uiso 1 1 calc R . .
C11 C -0.3199(3) 1.05372(16) 1.04678(18) 0.0234(5) Uani 1 1 d . . .
C12 C -0.2850(3) 1.06805(17) 0.95262(18) 0.0236(5) Uani 1 1 d . . .
C13 C -0.1865(3) 0.99722(17) 0.89356(18) 0.0221(5) Uani 1 1 d . . .
C14 C -0.3340(3) 1.15390(19) 0.8978(2) 0.0318(6) Uani 1 1 d . . .
H14A H -0.3148 1.2194 0.9237 0.038 Uiso 1 1 calc R . .
H14B H -0.4560 1.1501 0.8963 0.038 Uiso 1 1 calc R . .
C15 C -0.2112(4) 1.1381(2) 0.8005(2) 0.0385(6) Uani 1 1 d . . .
H15A H -0.2693 1.1576 0.7523 0.046 Uiso 1 1 calc R . .
H15B H -0.1066 1.1787 0.7926 0.046 Uiso 1 1 calc R . .
C16 C -0.1641(3) 1.02526(19) 0.79431(19) 0.0295(5) Uani 1 1 d . . .
H16 H -0.0423 1.0139 0.7579 0.035 Uiso 1 1 calc R . .
C17 C -0.4257(3) 1.12921(19) 1.1130(2) 0.0314(6) Uani 1 1 d . . .
H17A H -0.4561 1.1006 1.1753 0.047 Uiso 1 1 calc R . .
H17B H -0.5310 1.1461 1.0945 0.047 Uiso 1 1 calc R . .
H17C H -0.3587 1.1900 1.1123 0.047 Uiso 1 1 calc R . .
C18 C -0.2762(3) 0.87004(19) 0.75480(19) 0.0305(5) Uani 1 1 d . . .
H18A H -0.3424 0.8459 0.8160 0.037 Uiso 1 1 calc R . .
H18B H -0.1556 0.8457 0.7443 0.037 Uiso 1 1 calc R . .
C19 C -0.3523(5) 0.8305(3) 0.6815(3) 0.0540(9) Uani 1 1 d . . .
H19A H -0.2888 0.8566 0.6214 0.081 Uiso 1 1 calc R . .
H19B H -0.4733 0.8519 0.6941 0.081 Uiso 1 1 calc R . .
H19C H -0.3445 0.7570 0.6811 0.081 Uiso 1 1 calc R . .
C20 C 0.1749(3) 0.6517(2) 0.71503(17) 0.0263(5) Uani 1 1 d . . .
C21 C 0.1713(4) 0.5856(2) 0.64307(19) 0.0336(6) Uani 1 1 d . . .
H21 H 0.1790 0.5153 0.6529 0.040 Uiso 1 1 calc R . .
C22 C 0.1568(4) 0.6203(2) 0.55901(19) 0.0385(6) Uani 1 1 d . . .
C23 C 0.1494(3) 0.7231(2) 0.54983(19) 0.0356(6) Uani 1 1 d . . .
C24 C 0.1568(3) 0.7843(2) 0.62282(18) 0.0304(5) Uani 1 1 d . . .
C25 C 0.1344(4) 0.7865(3) 0.4674(2) 0.0475(8) Uani 1 1 d . . .
H25A H 0.2191 0.7640 0.4105 0.057 Uiso 1 1 calc R . .
H25B H 0.0172 0.7832 0.4582 0.057 Uiso 1 1 calc R . .
C26 C 0.1711(7) 0.8873(3) 0.4922(3) 0.0673(11) Uani 1 1 d . . .
H26A H 0.0890 0.9356 0.4755 0.081 Uiso 1 1 calc R . .
H26B H 0.2888 0.9055 0.4572 0.081 Uiso 1 1 calc R . .
C27 C 0.1562(3) 0.8939(2) 0.59617(19) 0.0344(6) Uani 1 1 d . . .
H27 H 0.0455 0.9277 0.6291 0.041 Uiso 1 1 calc R . .
C28 C 0.1567(6) 0.5500(3) 0.4803(2) 0.0576(9) Uani 1 1 d . . .
H28A H 0.2559 0.5640 0.4283 0.086 Uiso 1 1 calc R . .
H28B H 0.0502 0.5602 0.4610 0.086 Uiso 1 1 calc R . .
H28C H 0.1640 0.4804 0.5007 0.086 Uiso 1 1 calc R . .
C29 C 0.3001(4) 1.0455(2) 0.6028(2) 0.0452(7) Uani 1 1 d . . .
H29A H 0.2005 1.0778 0.6467 0.054 Uiso 1 1 calc R . .
H29B H 0.2934 1.0620 0.5394 0.054 Uiso 1 1 calc R . .
C30 C 0.4640(8) 1.0836(3) 0.6178(5) 0.098(2) Uani 1 1 d . . .
H30A H 0.5617 1.0572 0.5698 0.146 Uiso 1 1 calc R . .
H30B H 0.4751 1.0615 0.6784 0.146 Uiso 1 1 calc R . .
H30C H 0.4629 1.1571 0.6150 0.146 Uiso 1 1 calc R . .
C31 C 0.3525(3) 0.39241(18) 1.08138(18) 0.0252(5) Uani 1 1 d . . .
H31A H 0.2683 0.3495 1.1226 0.038 Uiso 1 1 calc R . .
H31B H 0.4461 0.4067 1.1098 0.038 Uiso 1 1 calc R . .
H31C H 0.3994 0.3580 1.0226 0.038 Uiso 1 1 calc R . .
C32 C 0.2088(3) 0.5323(2) 1.23407(18) 0.0284(5) Uani 1 1 d . . .
H32A H 0.1497 0.4697 1.2563 0.043 Uiso 1 1 calc R . .
H32B H 0.1564 0.5873 1.2753 0.043 Uiso 1 1 calc R . .
H32C H 0.3308 0.5252 1.2329 0.043 Uiso 1 1 calc R . .
O51 O 1.1678(2) 0.27297(17) 0.43280(16) 0.0439(5) Uani 1 1 d . . .
O52 O 0.8816(3) -0.00520(17) 0.28211(14) 0.0415(5) Uani 1 1 d . . .
N51 N 0.8863(2) 0.34826(14) 0.15033(14) 0.0199(4) Uani 1 1 d . . .
H51 H 0.918(4) 0.315(2) 0.182(2) 0.024 Uiso 1 1 d . . .
N52 N 0.7550(3) 0.48256(14) 0.25643(15) 0.0236(4) Uani 1 1 d . . .
N53 N 0.8741(2) 0.35861(15) 0.34090(15) 0.0244(4) Uani 1 1 d . . .
N54 N 0.9930(2) 0.26076(14) 0.00367(14) 0.0207(4) Uani 1 1 d . . .
N55 N 1.0278(2) 0.15580(14) 0.12828(15) 0.0224(4) Uani 1 1 d . . .
C51 C 0.9146(3) 0.33327(16) 0.05640(17) 0.0198(4) Uani 1 1 d . . .
C52 C 0.8379(3) 0.42025(16) 0.02033(17) 0.0196(4) Uani 1 1 d . . .
C53 C 0.7722(3) 0.48457(17) 0.09358(17) 0.0211(5) Uani 1 1 d . . .
C54 C 0.8039(3) 0.43982(16) 0.17687(17) 0.0204(4) Uani 1 1 d . . .
C55 C 0.8211(3) 0.44290(17) -0.06686(17) 0.0207(4) Uani 1 1 d . . .
H55 H 0.8637 0.3976 -0.1163 0.025 Uiso 1 1 calc R . .
C56 C 0.7410(3) 0.53313(17) -0.08155(17) 0.0217(5) Uani 1 1 d . . .
C57 C 0.6753(3) 0.59913(16) -0.00670(17) 0.0211(5) Uani 1 1 d . . .
C58 C 0.6906(3) 0.57379(16) 0.08095(17) 0.0215(5) Uani 1 1 d . . .
H58 H 0.6455 0.6173 0.1315 0.026 Uiso 1 1 calc R . .
C59 C 0.7767(3) 0.44129(17) 0.33875(17) 0.0239(5) Uani 1 1 d . . .
C60 C 0.6915(3) 0.49453(19) 0.41850(19) 0.0293(5) Uani 1 1 d . . .
H60 H 0.6248 0.5527 0.4131 0.035 Uiso 1 1 calc R . .
C61 C 0.7035(3) 0.4632(2) 0.50514(19) 0.0332(6) Uani 1 1 d . . .
C62 C 0.8011(3) 0.3763(2) 0.50728(19) 0.0330(6) Uani 1 1 d . . .
C63 C 0.8836(3) 0.32928(19) 0.42501(18) 0.0266(5) Uani 1 1 d . . .
C64 C 0.8389(4) 0.3241(3) 0.5882(2) 0.0457(8) Uani 1 1 d . . .
H64A H 0.7323 0.3138 0.6378 0.055 Uiso 1 1 calc R . .
H64B H 0.9208 0.3626 0.6130 0.055 Uiso 1 1 calc R . .
C65 C 0.9194(4) 0.2229(3) 0.5477(2) 0.0473(8) Uani 1 1 d . . .
H65A H 1.0101 0.2002 0.5773 0.057 Uiso 1 1 calc R . .
H65B H 0.8307 0.1706 0.5566 0.057 Uiso 1 1 calc R . .
C66 C 0.9959(3) 0.2440(2) 0.4454(2) 0.0350(6) Uani 1 1 d . . .
H66 H 0.9890 0.1837 0.4075 0.042 Uiso 1 1 calc R . .
C67 C 0.6206(5) 0.5225(3) 0.5908(2) 0.0518(9) Uani 1 1 d . . .
H67A H 0.7102 0.5536 0.6142 0.078 Uiso 1 1 calc R . .
H67B H 0.5529 0.4776 0.6379 0.078 Uiso 1 1 calc R . .
H67C H 0.5450 0.5749 0.5759 0.078 Uiso 1 1 calc R . .
C68 C 1.2694(4) 0.2626(2) 0.3416(2) 0.0435(7) Uani 1 1 d . . .
H68A H 1.2137 0.2986 0.2989 0.052 Uiso 1 1 calc R . .
H68B H 1.2813 0.1908 0.3243 0.052 Uiso 1 1 calc R . .
C69 C 1.4428(4) 0.3051(3) 0.3348(3) 0.0510(8) Uani 1 1 d . . .
H69A H 1.5145 0.2982 0.2715 0.076 Uiso 1 1 calc R . .
H69B H 1.4974 0.2688 0.3769 0.076 Uiso 1 1 calc R . .
H69C H 1.4301 0.3763 0.3514 0.076 Uiso 1 1 calc R . .
C70 C 1.0601(3) 0.17482(16) 0.03743(17) 0.0207(5) Uani 1 1 d . . .
C71 C 1.1577(3) 0.10964(18) -0.03041(18) 0.0233(5) Uani 1 1 d . . .
H71 H 1.1763 0.1266 -0.0937 0.028 Uiso 1 1 calc R . .
C72 C 1.2265(3) 0.02132(17) -0.00555(18) 0.0242(5) Uani 1 1 d . . .
C73 C 1.1923(3) 0.00087(16) 0.08850(18) 0.0231(5) Uani 1 1 d . . .
C74 C 1.0920(3) 0.06828(17) 0.15082(17) 0.0220(5) Uani 1 1 d . . .
C75 C 1.2466(3) -0.08757(17) 0.13764(19) 0.0271(5) Uani 1 1 d . . .
H75A H 1.3736 -0.0956 0.1206 0.033 Uiso 1 1 calc R . .
H75B H 1.1955 -0.1501 0.1226 0.033 Uiso 1 1 calc R . .
C76 C 1.1774(4) -0.0621(2) 0.2417(2) 0.0462(8) Uani 1 1 d . . .
H76A H 1.1150 -0.1199 0.2757 0.055 Uiso 1 1 calc R . .
H76B H 1.2737 -0.0461 0.2685 0.055 Uiso 1 1 calc R . .
C77 C 1.0562(3) 0.02821(18) 0.24819(19) 0.0283(5) Uani 1 1 d . . .
H77 H 1.0824 0.0799 0.2902 0.034 Uiso 1 1 calc R . .
C78 C 1.3291(3) -0.05054(18) -0.0773(2) 0.0300(5) Uani 1 1 d . . .
H78A H 1.2532 -0.1026 -0.0892 0.045 Uiso 1 1 calc R . .
H78B H 1.4216 -0.0818 -0.0548 0.045 Uiso 1 1 calc R . .
H78C H 1.3789 -0.0138 -0.1345 0.045 Uiso 1 1 calc R . .
C79 C 0.7570(4) 0.0695(2) 0.3130(3) 0.0470(7) Uani 1 1 d . . .
H79A H 0.7520 0.1148 0.2612 0.056 Uiso 1 1 calc R . .
H79B H 0.7883 0.1097 0.3611 0.056 Uiso 1 1 calc R . .
C80 C 0.5841(5) 0.0238(3) 0.3517(3) 0.0583(9) Uani 1 1 d . . .
H80A H 0.5666 -0.0294 0.3106 0.087 Uiso 1 1 calc R . .
H80B H 0.4940 0.0756 0.3571 0.087 Uiso 1 1 calc R . .
H80C H 0.5787 -0.0046 0.4127 0.087 Uiso 1 1 calc R . .
C81 C 0.7254(3) 0.5601(2) -0.17687(19) 0.0296(5) Uani 1 1 d . . .
H81A H 0.7722 0.5050 -0.2193 0.044 Uiso 1 1 calc R . .
H81B H 0.7899 0.6212 -0.1982 0.044 Uiso 1 1 calc R . .
H81C H 0.6039 0.5716 -0.1751 0.044 Uiso 1 1 calc R . .
C82 C 0.5880(3) 0.69693(18) -0.0212(2) 0.0283(5) Uani 1 1 d . . .
H82A H 0.6711 0.7401 -0.0629 0.042 Uiso 1 1 calc R . .
H82B H 0.5441 0.7307 0.0382 0.042 Uiso 1 1 calc R . .
H82C H 0.4922 0.6835 -0.0482 0.042 Uiso 1 1 calc R . .

loop_
_atom_site_aniso_label
_atom_site_aniso_U_11
_atom_site_aniso_U_22
_atom_site_aniso_U_33
_atom_site_aniso_U_23
_atom_site_aniso_U_13
_atom_site_aniso_U_12
Cl11 0.0783(6) 0.0469(4) 0.0804(7) -0.0061(4) -0.0515(5) -0.0043(4)
Cl12 0.0372(3) 0.0508(4) 0.0388(4) -0.0035(3) -0.0109(3) 0.0171(3)
C91 0.0329(13) 0.0311(13) 0.0440(18) 0.0026(12) -0.0097(12) 0.0058(10)
Cl21 0.0418(4) 0.0534(4) 0.0516(5) -0.0131(3) -0.0090(3) 0.0117(3)
Cl22 0.1185(9) 0.0446(4) 0.0787(7) -0.0025(4) -0.0559(7) 0.0138(5)
C92 0.0378(16) 0.0458(17) 0.075(3) 0.0087(17) -0.0132(16) 0.0093(13)
O1 0.0380(10) 0.0338(9) 0.0312(11) 0.0064(8) -0.0182(8) 0.0020(7)
O2 0.0718(15) 0.0296(10) 0.0819(19) 0.0022(11) -0.0513(14) 0.0090(10)
N1 0.0195(8) 0.0209(9) 0.0170(10) 0.0017(8) -0.0070(8) 0.0030(7)
N2 0.0209(9) 0.0220(9) 0.0179(10) 0.0019(7) -0.0053(7) -0.0015(7)
N3 0.0178(8) 0.0233(9) 0.0188(11) 0.0038(7) -0.0052(7) -0.0005(7)
N4 0.0236(9) 0.0286(10) 0.0169(11) 0.0008(8) -0.0058(8) 0.0044(7)
N5 0.0271(10) 0.0325(10) 0.0164(11) 0.0047(8) -0.0030(8) 0.0073(8)
C1 0.0184(9) 0.0210(10) 0.0206(13) 0.0019(9) -0.0065(9) -0.0009(8)
C2 0.0178(10) 0.0213(10) 0.0178(12) 0.0014(9) -0.0067(8) -0.0019(8)
C3 0.0165(9) 0.0192(10) 0.0198(12) 0.0013(8) -0.0057(8) -0.0031(8)
C4 0.0155(9) 0.0211(10) 0.0167(12) 0.0040(8) -0.0047(8) -0.0042(8)
C5 0.0213(10) 0.0235(10) 0.0211(13) 0.0003(9) -0.0071(9) -0.0004(8)
C6 0.0182(10) 0.0227(11) 0.0249(13) 0.0062(9) -0.0097(9) -0.0037(8)
C7 0.0190(10) 0.0281(11) 0.0194(13) 0.0055(9) -0.0079(9) -0.0042(8)
C8 0.0200(10) 0.0239(10) 0.0192(12) 0.0008(9) -0.0052(9) -0.0026(8)
C9 0.0180(10) 0.0185(10) 0.0238(13) 0.0025(9) -0.0077(9) -0.0024(8)
C10 0.0239(11) 0.0229(10) 0.0212(13) -0.0003(9) -0.0049(9) -0.0031(8)
C11 0.0187(10) 0.0197(10) 0.0315(14) -0.0011(10) -0.0062(9) -0.0024(8)
C12 0.0180(10) 0.0225(10) 0.0320(14) 0.0046(10) -0.0093(9) -0.0034(8)
C13 0.0199(10) 0.0219(10) 0.0270(13) 0.0056(9) -0.0107(9) -0.0044(8)
C14 0.0344(13) 0.0237(11) 0.0410(16) 0.0087(11) -0.0168(12) -0.0008(9)
C15 0.0450(15) 0.0312(13) 0.0426(18) 0.0155(12) -0.0176(13) -0.0050(11)
C16 0.0295(12) 0.0302(12) 0.0296(15) 0.0088(10) -0.0091(10) -0.0029(9)
C17 0.0312(12) 0.0248(11) 0.0357(16) -0.0040(11) -0.0042(11) 0.0047(9)
C18 0.0309(12) 0.0333(12) 0.0279(14) 0.0026(10) -0.0090(10) 0.0041(9)
C19 0.071(2) 0.0430(17) 0.061(2) -0.0028(15) -0.0406(19) 0.0000(15)
C20 0.0249(11) 0.0379(13) 0.0150(13) 0.0008(10) -0.0036(9) 0.0059(9)
C21 0.0389(14) 0.0405(14) 0.0218(14) -0.0017(11) -0.0090(11) 0.0019(11)
C22 0.0419(15) 0.0566(18) 0.0165(14) -0.0013(12) -0.0063(11) -0.0038(13)
C23 0.0273(12) 0.0599(17) 0.0182(14) 0.0039(12) -0.0041(10) 0.0049(11)
C24 0.0226(11) 0.0424(14) 0.0236(14) 0.0071(11) -0.0023(9) 0.0067(10)
C25 0.0463(16) 0.072(2) 0.0250(16) 0.0101(15) -0.0108(13) 0.0044(15)
C26 0.105(3) 0.068(2) 0.038(2) 0.0241(18) -0.035(2) -0.025(2)
C27 0.0312(12) 0.0432(15) 0.0259(15) 0.0115(11) -0.0037(10) 0.0102(10)
C28 0.087(3) 0.065(2) 0.0228(17) -0.0036(15) -0.0175(16) -0.0111(19)
C29 0.0570(18) 0.0329(14) 0.045(2) 0.0085(13) -0.0124(15) 0.0085(12)
C30 0.125(4) 0.0354(19) 0.167(6) 0.018(3) -0.100(4) -0.007(2)
C31 0.0231(11) 0.0268(11) 0.0271(14) 0.0053(10) -0.0094(10) 0.0005(9)
C32 0.0339(13) 0.0330(12) 0.0213(13) 0.0060(10) -0.0128(11) 0.0009(10)
O51 0.0306(10) 0.0568(13) 0.0467(13) -0.0102(10) -0.0145(9) 0.0038(9)
O52 0.0371(10) 0.0576(13) 0.0264(11) 0.0034(9) -0.0026(8) 0.0057(9)
N51 0.0206(9) 0.0205(9) 0.0184(11) 0.0040(8) -0.0050(8) 0.0002(7)
N52 0.0267(10) 0.0233(9) 0.0198(11) 0.0017(8) -0.0040(8) -0.0029(7)
N53 0.0215(9) 0.0304(10) 0.0211(11) -0.0014(8) -0.0054(8) -0.0006(7)
N54 0.0193(8) 0.0217(9) 0.0211(11) 0.0005(8) -0.0053(8) 0.0005(7)
N55 0.0237(9) 0.0204(9) 0.0253(12) 0.0014(8) -0.0105(8) 0.0004(7)
C51 0.0170(9) 0.0223(10) 0.0210(12) 0.0017(9) -0.0061(9) -0.0046(8)
C52 0.0150(9) 0.0218(10) 0.0217(13) 0.0023(9) -0.0046(8) -0.0013(8)
C53 0.0181(10) 0.0237(11) 0.0211(13) 0.0010(9) -0.0042(9) -0.0040(8)
C54 0.0192(10) 0.0214(10) 0.0204(12) 0.0016(9) -0.0048(9) -0.0022(8)
C55 0.0192(10) 0.0246(11) 0.0180(12) 0.0021(9) -0.0042(9) -0.0028(8)
C56 0.0188(10) 0.0247(11) 0.0216(13) 0.0034(9) -0.0054(9) -0.0019(8)
C57 0.0159(10) 0.0204(10) 0.0266(13) 0.0029(9) -0.0045(9) -0.0023(8)
C58 0.0194(10) 0.0193(10) 0.0252(13) 0.0007(9) -0.0045(9) -0.0014(8)
C59 0.0250(11) 0.0256(11) 0.0215(13) 0.0006(9) -0.0063(9) -0.0018(9)
C60 0.0313(12) 0.0301(12) 0.0259(14) 0.0000(10) -0.0069(10) 0.0043(9)
C61 0.0329(13) 0.0437(14) 0.0215(14) 0.0004(11) -0.0051(11) 0.0075(11)
C62 0.0277(12) 0.0487(15) 0.0225(14) 0.0030(11) -0.0067(10) 0.0029(11)
C63 0.0207(10) 0.0345(12) 0.0247(14) -0.0001(10) -0.0064(9) 0.0009(9)
C64 0.0470(17) 0.063(2) 0.0256(16) 0.0028(14) -0.0082(13) 0.0225(14)
C65 0.0509(17) 0.0564(19) 0.0348(18) 0.0031(14) -0.0130(14) 0.0174(14)
C66 0.0317(13) 0.0440(15) 0.0303(15) 0.0005(12) -0.0104(11) 0.0064(11)
C67 0.061(2) 0.068(2) 0.0241(16) -0.0082(15) -0.0097(14) 0.0304(17)
C68 0.0344(14) 0.0426(15) 0.050(2) -0.0051(14) -0.0042(13) 0.0013(12)
C69 0.0371(15) 0.0467(17) 0.063(2) -0.0066(16) -0.0013(15) -0.0059(13)
C70 0.0178(10) 0.0206(10) 0.0243(13) 0.0008(9) -0.0063(9) -0.0015(8)
C71 0.0235(10) 0.0245(11) 0.0214(13) -0.0007(9) -0.0049(9) -0.0015(8)
C72 0.0200(10) 0.0229(11) 0.0297(14) -0.0032(10) -0.0060(9) -0.0029(8)
C73 0.0210(10) 0.0198(10) 0.0318(14) 0.0003(9) -0.0125(10) -0.0020(8)
C74 0.0199(10) 0.0234(10) 0.0250(13) -0.0003(9) -0.0099(9) -0.0009(8)
C75 0.0295(12) 0.0223(11) 0.0332(15) 0.0004(10) -0.0149(10) 0.0051(9)
C76 0.0498(17) 0.0483(17) 0.0363(18) 0.0082(14) -0.0055(14) 0.0212(14)
C77 0.0331(12) 0.0258(11) 0.0285(14) 0.0016(10) -0.0131(10) 0.0035(9)
C78 0.0285(12) 0.0256(11) 0.0333(15) -0.0022(10) -0.0035(10) 0.0037(9)
C79 0.0479(17) 0.0436(16) 0.050(2) -0.0032(14) -0.0138(15) 0.0044(13)
C80 0.0531(19) 0.0520(19) 0.057(2) 0.0049(16) 0.0067(16) 0.0115(15)
C81 0.0299(12) 0.0341(12) 0.0258(14) 0.0055(10) -0.0091(11) 0.0008(10)
C82 0.0262(11) 0.0236(11) 0.0372(16) 0.0048(10) -0.0123(11) 0.0006(9)

_geom_special_details            
; 
 All esds (except the esd in the dihedral angle between two l.s. planes) 
 are estimated using the full covariance matrix.  The cell esds are taken 
 into account individually in the estimation of esds in distances, angles 
 and torsion angles; correlations between esds in cell parameters are only 
 used when they are defined by crystal symmetry.  An approximate (isotropic) 
 treatment of cell esds is used for estimating esds involving l.s. planes. 
;

loop_
_geom_bond_atom_site_label_1
_geom_bond_atom_site_label_2
_geom_bond_distance
_geom_bond_site_symmetry_2
_geom_bond_publ_flag
Cl11 C91 1.755(3) . ?
Cl12 C91 1.766(3) . ?
C91 H91A 0.9900 . ?
C91 H91B 0.9900 . ?
Cl21 C92 1.761(3) . ?
Cl22 C92 1.778(4) . ?
C92 H92A 0.9900 . ?
C92 H92B 0.9900 . ?
O1 C16 1.429(3) . ?
O1 C18 1.429(3) . ?
O2 C27 1.390(4) . ?
O2 C29 1.412(3) . ?
N1 C4 1.391(3) . ?
N1 C1 1.397(3) . ?
N1 H1 0.84(3) . ?
N2 C4 1.291(3) . ?
N2 C9 1.398(3) . ?
N3 C9 1.342(3) . ?
N3 C13 1.346(3) . ?
N4 C1 1.282(3) . ?
N4 C20 1.404(3) . ?
N5 C20 1.336(3) . ?
N5 C24 1.345(3) . ?
C1 C2 1.477(3) . ?
C2 C5 1.382(3) . ?
C2 C3 1.393(3) . ?
C3 C8 1.380(3) . ?
C3 C4 1.467(3) . ?
C5 C6 1.393(3) . ?
C5 H5 0.9500 . ?
C6 C7 1.418(3) . ?
C6 C31 1.505(3) . ?
C7 C8 1.402(3) . ?
C7 C32 1.498(3) . ?
C8 H8 0.9500 . ?
C9 C10 1.406(3) . ?
C10 C11 1.392(3) . ?
C10 H10 0.9500 . ?
C11 C12 1.381(4) . ?
C11 C17 1.508(3) . ?
C12 C13 1.389(3) . ?
C12 C14 1.509(3) . ?
C13 C16 1.500(4) . ?
C14 C15 1.551(5) . ?
C14 H14A 0.9900 . ?
C14 H14B 0.9900 . ?
C15 C16 1.541(4) . ?
C15 H15A 0.9900 . ?
C15 H15B 0.9900 . ?
C16 H16 1.0000 . ?
C17 H17A 0.9800 . ?
C17 H17B 0.9800 . ?
C17 H17C 0.9800 . ?
C18 C19 1.496(4) . ?
C18 H18A 0.9900 . ?
C18 H18B 0.9900 . ?
C19 H19A 0.9800 . ?
C19 H19B 0.9800 . ?
C19 H19C 0.9800 . ?
C20 C21 1.408(4) . ?
C21 C22 1.374(4) . ?
C21 H21 0.9500 . ?
C22 C23 1.378(4) . ?
C22 C28 1.516(4) . ?
C23 C24 1.387(4) . ?
C23 C25 1.522(4) . ?
C24 C27 1.512(4) . ?
C25 C26 1.453(5) . ?
C25 H25A 0.9900 . ?
C25 H25B 0.9900 . ?
C26 C27 1.539(5) . ?
C26 H26A 0.9900 . ?
C26 H26B 0.9900 . ?
C27 H27 1.0000 . ?
C28 H28A 0.9800 . ?
C28 H28B 0.9800 . ?
C28 H28C 0.9800 . ?
C29 C30 1.493(6) . ?
C29 H29A 0.9900 . ?
C29 H29B 0.9900 . ?
C30 H30A 0.9800 . ?
C30 H30B 0.9800 . ?
C30 H30C 0.9800 . ?
C31 H31A 0.9800 . ?
C31 H31B 0.9800 . ?
C31 H31C 0.9800 . ?
C32 H32A 0.9800 . ?
C32 H32B 0.9800 . ?
C32 H32C 0.9800 . ?
O51 C66 1.408(3) . ?
O51 C68 1.408(4) . ?
O52 C79 1.393(4) . ?
O52 C77 1.441(3) . ?
N51 C51 1.386(3) . ?
N51 C54 1.389(3) . ?
N51 H51 0.75(3) . ?
N52 C54 1.292(3) . ?
N52 C59 1.400(3) . ?
N53 C63 1.341(3) . ?
N53 C59 1.345(3) . ?
N54 C51 1.301(3) . ?
N54 C70 1.403(3) . ?
N55 C74 1.343(3) . ?
N55 C70 1.344(3) . ?
C51 C52 1.468(3) . ?
C52 C55 1.382(3) . ?
C52 C53 1.387(3) . ?
C53 C58 1.383(3) . ?
C53 C54 1.461(3) . ?
C55 C56 1.397(3) . ?
C55 H55 0.9500 . ?
C56 C57 1.418(3) . ?
C56 C81 1.510(4) . ?
C57 C58 1.393(3) . ?
C57 C82 1.510(3) . ?
C58 H58 0.9500 . ?
C59 C60 1.407(3) . ?
C60 C61 1.390(4) . ?
C60 H60 0.9500 . ?
C61 C62 1.392(4) . ?
C61 C67 1.510(4) . ?
C62 C63 1.390(4) . ?
C62 C64 1.492(4) . ?
C63 C66 1.517(3) . ?
C64 C65 1.545(4) . ?
C64 H64A 0.9900 . ?
C64 H64B 0.9900 . ?
C65 C66 1.526(5) . ?
C65 H65A 0.9900 . ?
C65 H65B 0.9900 . ?
C66 H66 1.0000 . ?
C67 H67A 0.9800 . ?
C67 H67B 0.9800 . ?
C67 H67C 0.9800 . ?
C68 C69 1.494(4) . ?
C68 H68A 0.9900 . ?
C68 H68B 0.9900 . ?
C69 H69A 0.9800 . ?
C69 H69B 0.9800 . ?
C69 H69C 0.9800 . ?
C70 C71 1.409(3) . ?
C71 C72 1.381(3) . ?
C71 H71 0.9500 . ?
C72 C73 1.393(4) . ?
C72 C78 1.513(3) . ?
C73 C74 1.389(3) . ?
C73 C75 1.503(3) . ?
C74 C77 1.511(4) . ?
C75 C76 1.556(4) . ?
C75 H75A 0.9900 . ?
C75 H75B 0.9900 . ?
C76 C77 1.523(4) . ?
C76 H76A 0.9900 . ?
C76 H76B 0.9900 . ?
C77 H77 1.0000 . ?
C78 H78A 0.9800 . ?
C78 H78B 0.9800 . ?
C78 H78C 0.9800 . ?
C79 C80 1.499(5) . ?
C79 H79A 0.9900 . ?
C79 H79B 0.9900 . ?
C80 H80A 0.9800 . ?
C80 H80B 0.9800 . ?
C80 H80C 0.9800 . ?
C81 H81A 0.9800 . ?
C81 H81B 0.9800 . ?
C81 H81C 0.9800 . ?
C82 H82A 0.9800 . ?
C82 H82B 0.9800 . ?
C82 H82C 0.9800 . ?

loop_
_geom_angle_atom_site_label_1
_geom_angle_atom_site_label_2
_geom_angle_atom_site_label_3
_geom_angle
_geom_angle_site_symmetry_1
_geom_angle_site_symmetry_3
_geom_angle_publ_flag
Cl11 C91 Cl12 110.81(16) . . ?
Cl11 C91 H91A 109.5 . . ?
Cl12 C91 H91A 109.5 . . ?
Cl11 C91 H91B 109.5 . . ?
Cl12 C91 H91B 109.5 . . ?
H91A C91 H91B 108.1 . . ?
Cl21 C92 Cl22 110.48(19) . . ?
Cl21 C92 H92A 109.6 . . ?
Cl22 C92 H92A 109.6 . . ?
Cl21 C92 H92B 109.6 . . ?
Cl22 C92 H92B 109.6 . . ?
H92A C92 H92B 108.1 . . ?
C16 O1 C18 115.10(19) . . ?
C27 O2 C29 115.0(2) . . ?
C4 N1 C1 111.91(19) . . ?
C4 N1 H1 120(2) . . ?
C1 N1 H1 128(2) . . ?
C4 N2 C9 122.2(2) . . ?
C9 N3 C13 115.9(2) . . ?
C1 N4 C20 123.5(2) . . ?
C20 N5 C24 115.1(2) . . ?
N4 C1 N1 130.3(2) . . ?
N4 C1 C2 124.1(2) . . ?
N1 C1 C2 105.61(19) . . ?
C5 C2 C3 120.8(2) . . ?
C5 C2 C1 131.1(2) . . ?
C3 C2 C1 108.06(19) . . ?
C8 C3 C2 120.5(2) . . ?
C8 C3 C4 131.2(2) . . ?
C2 C3 C4 108.2(2) . . ?
N2 C4 N1 130.5(2) . . ?
N2 C4 C3 123.4(2) . . ?
N1 C4 C3 106.11(18) . . ?
C2 C5 C6 119.6(2) . . ?
C2 C5 H5 120.2 . . ?
C6 C5 H5 120.2 . . ?
C5 C6 C7 119.8(2) . . ?
C5 C6 C31 119.8(2) . . ?
C7 C6 C31 120.4(2) . . ?
C8 C7 C6 119.6(2) . . ?
C8 C7 C32 119.6(2) . . ?
C6 C7 C32 120.8(2) . . ?
C3 C8 C7 119.6(2) . . ?
C3 C8 H8 120.2 . . ?
C7 C8 H8 120.2 . . ?
N3 C9 N2 121.1(2) . . ?
N3 C9 C10 122.6(2) . . ?
N2 C9 C10 116.2(2) . . ?
C11 C10 C9 120.7(2) . . ?
C11 C10 H10 119.7 . . ?
C9 C10 H10 119.7 . . ?
C12 C11 C10 116.4(2) . . ?
C12 C11 C17 121.2(2) . . ?
C10 C11 C17 122.4(2) . . ?
C11 C12 C13 119.7(2) . . ?
C11 C12 C14 130.2(2) . . ?
C13 C12 C14 110.1(2) . . ?
N3 C13 C12 124.7(2) . . ?
N3 C13 C16 123.4(2) . . ?
C12 C13 C16 111.9(2) . . ?
C12 C14 C15 102.8(2) . . ?
C12 C14 H14A 111.2 . . ?
C15 C14 H14A 111.2 . . ?
C12 C14 H14B 111.2 . . ?
C15 C14 H14B 111.2 . . ?
H14A C14 H14B 109.1 . . ?
C16 C15 C14 105.8(2) . . ?
C16 C15 H15A 110.6 . . ?
C14 C15 H15A 110.6 . . ?
C16 C15 H15B 110.6 . . ?
C14 C15 H15B 110.6 . . ?
H15A C15 H15B 108.7 . . ?
O1 C16 C13 114.0(2) . . ?
O1 C16 C15 107.3(2) . . ?
C13 C16 C15 102.2(2) . . ?
O1 C16 H16 111.0 . . ?
C13 C16 H16 111.0 . . ?
C15 C16 H16 111.0 . . ?
C11 C17 H17A 109.5 . . ?
C11 C17 H17B 109.5 . . ?
H17A C17 H17B 109.5 . . ?
C11 C17 H17C 109.5 . . ?
H17A C17 H17C 109.5 . . ?
H17B C17 H17C 109.5 . . ?
O1 C18 C19 109.0(2) . . ?
O1 C18 H18A 109.9 . . ?
C19 C18 H18A 109.9 . . ?
O1 C18 H18B 109.9 . . ?
C19 C18 H18B 109.9 . . ?
H18A C18 H18B 108.3 . . ?
C18 C19 H19A 109.5 . . ?
C18 C19 H19B 109.5 . . ?
H19A C19 H19B 109.5 . . ?
C18 C19 H19C 109.5 . . ?
H19A C19 H19C 109.5 . . ?
H19B C19 H19C 109.5 . . ?
N5 C20 N4 121.4(2) . . ?
N5 C20 C21 122.7(2) . . ?
N4 C20 C21 115.9(2) . . ?
C22 C21 C20 121.5(3) . . ?
C22 C21 H21 119.2 . . ?
C20 C21 H21 119.2 . . ?
C21 C22 C23 115.7(3) . . ?
C21 C22 C28 122.0(3) . . ?
C23 C22 C28 122.3(3) . . ?
C22 C23 C24 120.0(3) . . ?
C22 C23 C25 129.7(3) . . ?
C24 C23 C25 110.3(3) . . ?
N5 C24 C23 124.9(3) . . ?
N5 C24 C27 123.9(2) . . ?
C23 C24 C27 111.2(2) . . ?
C26 C25 C23 103.6(3) . . ?
C26 C25 H25A 111.0 . . ?
C23 C25 H25A 111.0 . . ?
C26 C25 H25B 111.0 . . ?
C23 C25 H25B 111.0 . . ?
H25A C25 H25B 109.0 . . ?
C25 C26 C27 110.7(3) . . ?
C25 C26 H26A 109.5 . . ?
C27 C26 H26A 109.5 . . ?
C25 C26 H26B 109.5 . . ?
C27 C26 H26B 109.5 . . ?
H26A C26 H26B 108.1 . . ?
O2 C27 C24 109.3(2) . . ?
O2 C27 C26 113.2(3) . . ?
C24 C27 C26 101.6(3) . . ?
O2 C27 H27 110.8 . . ?
C24 C27 H27 110.8 . . ?
C26 C27 H27 110.8 . . ?
C22 C28 H28A 109.5 . . ?
C22 C28 H28B 109.5 . . ?
H28A C28 H28B 109.5 . . ?
C22 C28 H28C 109.5 . . ?
H28A C28 H28C 109.5 . . ?
H28B C28 H28C 109.5 . . ?
O2 C29 C30 109.0(3) . . ?
O2 C29 H29A 109.9 . . ?
C30 C29 H29A 109.9 . . ?
O2 C29 H29B 109.9 . . ?
C30 C29 H29B 109.9 . . ?
H29A C29 H29B 108.3 . . ?
C29 C30 H30A 109.5 . . ?
C29 C30 H30B 109.5 . . ?
H30A C30 H30B 109.5 . . ?
C29 C30 H30C 109.5 . . ?
H30A C30 H30C 109.5 . . ?
H30B C30 H30C 109.5 . . ?
C6 C31 H31A 109.5 . . ?
C6 C31 H31B 109.5 . . ?
H31A C31 H31B 109.5 . . ?
C6 C31 H31C 109.5 . . ?
H31A C31 H31C 109.5 . . ?
H31B C31 H31C 109.5 . . ?
C7 C32 H32A 109.5 . . ?
C7 C32 H32B 109.5 . . ?
H32A C32 H32B 109.5 . . ?
C7 C32 H32C 109.5 . . ?
H32A C32 H32C 109.5 . . ?
H32B C32 H32C 109.5 . . ?
C66 O51 C68 113.8(2) . . ?
C79 O52 C77 116.1(2) . . ?
C51 N51 C54 111.3(2) . . ?
C51 N51 H51 125(2) . . ?
C54 N51 H51 123(2) . . ?
C54 N52 C59 124.7(2) . . ?
C63 N53 C59 115.3(2) . . ?
C51 N54 C70 123.2(2) . . ?
C74 N55 C70 115.3(2) . . ?
N54 C51 N51 131.1(2) . . ?
N54 C51 C52 122.3(2) . . ?
N51 C51 C52 106.60(19) . . ?
C55 C52 C53 120.9(2) . . ?
C55 C52 C51 131.8(2) . . ?
C53 C52 C51 107.4(2) . . ?
C58 C53 C52 120.9(2) . . ?
C58 C53 C54 130.5(2) . . ?
C52 C53 C54 108.6(2) . . ?
N52 C54 N51 131.4(2) . . ?
N52 C54 C53 122.5(2) . . ?
N51 C54 C53 106.1(2) . . ?
C52 C55 C56 119.3(2) . . ?
C52 C55 H55 120.3 . . ?
C56 C55 H55 120.3 . . ?
C55 C56 C57 119.7(2) . . ?
C55 C56 C81 120.0(2) . . ?
C57 C56 C81 120.3(2) . . ?
C58 C57 C56 120.0(2) . . ?
C58 C57 C82 119.6(2) . . ?
C56 C57 C82 120.5(2) . . ?
C53 C58 C57 119.3(2) . . ?
C53 C58 H58 120.4 . . ?
C57 C58 H58 120.4 . . ?
N53 C59 N52 122.5(2) . . ?
N53 C59 C60 122.9(2) . . ?
N52 C59 C60 114.5(2) . . ?
C61 C60 C59 120.9(2) . . ?
C61 C60 H60 119.5 . . ?
C59 C60 H60 119.5 . . ?
C60 C61 C62 115.9(2) . . ?
C60 C61 C67 121.6(3) . . ?
C62 C61 C67 122.5(3) . . ?
C63 C62 C61 119.4(2) . . ?
C63 C62 C64 111.7(2) . . ?
C61 C62 C64 128.9(3) . . ?
N53 C63 C62 125.5(2) . . ?
N53 C63 C66 125.5(2) . . ?
C62 C63 C66 108.9(2) . . ?
C62 C64 C65 103.1(2) . . ?
C62 C64 H64A 111.1 . . ?
C65 C64 H64A 111.1 . . ?
C62 C64 H64B 111.1 . . ?
C65 C64 H64B 111.1 . . ?
H64A C64 H64B 109.1 . . ?
C66 C65 C64 104.8(3) . . ?
C66 C65 H65A 110.8 . . ?
C64 C65 H65A 110.8 . . ?
C66 C65 H65B 110.8 . . ?
C64 C65 H65B 110.8 . . ?
H65A C65 H65B 108.9 . . ?
O51 C66 C63 112.0(2) . . ?
O51 C66 C65 108.3(2) . . ?
C63 C66 C65 103.5(2) . . ?
O51 C66 H66 111.0 . . ?
C63 C66 H66 111.0 . . ?
C65 C66 H66 111.0 . . ?
C61 C67 H67A 109.5 . . ?
C61 C67 H67B 109.5 . . ?
H67A C67 H67B 109.5 . . ?
C61 C67 H67C 109.5 . . ?
H67A C67 H67C 109.5 . . ?
H67B C67 H67C 109.5 . . ?
O51 C68 C69 108.9(3) . . ?
O51 C68 H68A 109.9 . . ?
C69 C68 H68A 109.9 . . ?
O51 C68 H68B 109.9 . . ?
C69 C68 H68B 109.9 . . ?
H68A C68 H68B 108.3 . . ?
C68 C69 H69A 109.5 . . ?
C68 C69 H69B 109.5 . . ?
H69A C69 H69B 109.5 . . ?
C68 C69 H69C 109.5 . . ?
H69A C69 H69C 109.5 . . ?
H69B C69 H69C 109.5 . . ?
N55 C70 N54 121.6(2) . . ?
N55 C70 C71 123.1(2) . . ?
N54 C70 C71 115.2(2) . . ?
C72 C71 C70 120.5(2) . . ?
C72 C71 H71 119.7 . . ?
C70 C71 H71 119.7 . . ?
C71 C72 C73 116.6(2) . . ?
C71 C72 C78 121.3(2) . . ?
C73 C72 C78 122.1(2) . . ?
C74 C73 C72 119.2(2) . . ?
C74 C73 C75 111.0(2) . . ?
C72 C73 C75 129.8(2) . . ?
N55 C74 C73 125.1(2) . . ?
N55 C74 C77 123.7(2) . . ?
C73 C74 C77 111.1(2) . . ?
C73 C75 C76 104.4(2) . . ?
C73 C75 H75A 110.9 . . ?
C76 C75 H75A 110.9 . . ?
C73 C75 H75B 110.9 . . ?
C76 C75 H75B 110.9 . . ?
H75A C75 H75B 108.9 . . ?
C77 C76 C75 107.0(2) . . ?
C77 C76 H76A 110.3 . . ?
C75 C76 H76A 110.3 . . ?
C77 C76 H76B 110.3 . . ?
C75 C76 H76B 110.3 . . ?
H76A C76 H76B 108.6 . . ?
O52 C77 C74 112.23(19) . . ?
O52 C77 C76 108.6(2) . . ?
C74 C77 C76 104.6(2) . . ?
O52 C77 H77 110.4 . . ?
C74 C77 H77 110.4 . . ?
C76 C77 H77 110.4 . . ?
C72 C78 H78A 109.5 . . ?
C72 C78 H78B 109.5 . . ?
H78A C78 H78B 109.5 . . ?
C72 C78 H78C 109.5 . . ?
H78A C78 H78C 109.5 . . ?
H78B C78 H78C 109.5 . . ?
O52 C79 C80 110.4(3) . . ?
O52 C79 H79A 109.6 . . ?
C80 C79 H79A 109.6 . . ?
O52 C79 H79B 109.6 . . ?
C80 C79 H79B 109.6 . . ?
H79A C79 H79B 108.1 . . ?
C79 C80 H80A 109.5 . . ?
C79 C80 H80B 109.5 . . ?
H80A C80 H80B 109.5 . . ?
C79 C80 H80C 109.5 . . ?
H80A C80 H80C 109.5 . . ?
H80B C80 H80C 109.5 . . ?
C56 C81 H81A 109.5 . . ?
C56 C81 H81B 109.5 . . ?
H81A C81 H81B 109.5 . . ?
C56 C81 H81C 109.5 . . ?
H81A C81 H81C 109.5 . . ?
H81B C81 H81C 109.5 . . ?
C57 C82 H82A 109.5 . . ?
C57 C82 H82B 109.5 . . ?
H82A C82 H82B 109.5 . . ?
C57 C82 H82C 109.5 . . ?
H82A C82 H82C 109.5 . . ?
H82B C82 H82C 109.5 . . ?

loop_
_geom_torsion_atom_site_label_1
_geom_torsion_atom_site_label_2
_geom_torsion_atom_site_label_3
_geom_torsion_atom_site_label_4
_geom_torsion
_geom_torsion_site_symmetry_1
_geom_torsion_site_symmetry_2
_geom_torsion_site_symmetry_3
_geom_torsion_site_symmetry_4
_geom_torsion_publ_flag
C20 N4 C1 N1 3.3(4) . . . . ?
C20 N4 C1 C2 -178.9(2) . . . . ?
C4 N1 C1 N4 176.4(2) . . . . ?
C4 N1 C1 C2 -1.7(2) . . . . ?
N4 C1 C2 C5 2.6(4) . . . . ?
N1 C1 C2 C5 -179.2(2) . . . . ?
N4 C1 C2 C3 -178.3(2) . . . . ?
N1 C1 C2 C3 0.0(2) . . . . ?
C5 C2 C3 C8 2.1(3) . . . . ?
C1 C2 C3 C8 -177.16(19) . . . . ?
C5 C2 C3 C4 -179.15(18) . . . . ?
C1 C2 C3 C4 1.6(2) . . . . ?
C9 N2 C4 N1 -1.1(3) . . . . ?
C9 N2 C4 C3 178.60(18) . . . . ?
C1 N1 C4 N2 -177.6(2) . . . . ?
C1 N1 C4 C3 2.6(2) . . . . ?
C8 C3 C4 N2 -3.8(3) . . . . ?
C2 C3 C4 N2 177.63(19) . . . . ?
C8 C3 C4 N1 176.0(2) . . . . ?
C2 C3 C4 N1 -2.6(2) . . . . ?
C3 C2 C5 C6 -0.6(3) . . . . ?
C1 C2 C5 C6 178.5(2) . . . . ?
C2 C5 C6 C7 -1.7(3) . . . . ?
C2 C5 C6 C31 177.76(19) . . . . ?
C5 C6 C7 C8 2.4(3) . . . . ?
C31 C6 C7 C8 -177.02(19) . . . . ?
C5 C6 C7 C32 -176.8(2) . . . . ?
C31 C6 C7 C32 3.8(3) . . . . ?
C2 C3 C8 C7 -1.3(3) . . . . ?
C4 C3 C8 C7 -179.8(2) . . . . ?
C6 C7 C8 C3 -0.9(3) . . . . ?
C32 C7 C8 C3 178.3(2) . . . . ?
C13 N3 C9 N2 -176.88(18) . . . . ?
C13 N3 C9 C10 0.9(3) . . . . ?
C4 N2 C9 N3 -5.8(3) . . . . ?
C4 N2 C9 C10 176.26(19) . . . . ?
N3 C9 C10 C11 -0.8(3) . . . . ?
N2 C9 C10 C11 177.15(19) . . . . ?
C9 C10 C11 C12 -0.5(3) . . . . ?
C9 C10 C11 C17 -178.7(2) . . . . ?
C10 C11 C12 C13 1.6(3) . . . . ?
C17 C11 C12 C13 179.7(2) . . . . ?
C10 C11 C12 C14 -176.6(2) . . . . ?
C17 C11 C12 C14 1.5(4) . . . . ?
C9 N3 C13 C12 0.2(3) . . . . ?
C9 N3 C13 C16 179.15(19) . . . . ?
C11 C12 C13 N3 -1.5(3) . . . . ?
C14 C12 C13 N3 177.0(2) . . . . ?
C11 C12 C13 C16 179.4(2) . . . . ?
C14 C12 C13 C16 -2.0(3) . . . . ?
C11 C12 C14 C15 163.7(2) . . . . ?
C13 C12 C14 C15 -14.6(3) . . . . ?
C12 C14 C15 C16 25.1(3) . . . . ?
C18 O1 C16 C13 -57.4(3) . . . . ?
C18 O1 C16 C15 -169.8(2) . . . . ?
N3 C13 C16 O1 83.3(3) . . . . ?
C12 C13 C16 O1 -97.7(2) . . . . ?
N3 C13 C16 C15 -161.3(2) . . . . ?
C12 C13 C16 C15 17.8(3) . . . . ?
C14 C15 C16 O1 94.2(3) . . . . ?
C14 C15 C16 C13 -26.0(3) . . . . ?
C16 O1 C18 C19 -159.5(3) . . . . ?
C24 N5 C20 N4 175.1(2) . . . . ?
C24 N5 C20 C21 -1.5(3) . . . . ?
C1 N4 C20 N5 28.7(3) . . . . ?
C1 N4 C20 C21 -154.5(2) . . . . ?
N5 C20 C21 C22 -0.4(4) . . . . ?
N4 C20 C21 C22 -177.2(2) . . . . ?
C20 C21 C22 C23 1.1(4) . . . . ?
C20 C21 C22 C28 178.6(3) . . . . ?
C21 C22 C23 C24 0.1(4) . . . . ?
C28 C22 C23 C24 -177.4(3) . . . . ?
C21 C22 C23 C25 179.6(3) . . . . ?
C28 C22 C23 C25 2.2(5) . . . . ?
C20 N5 C24 C23 2.9(3) . . . . ?
C20 N5 C24 C27 -176.2(2) . . . . ?
C22 C23 C24 N5 -2.2(4) . . . . ?
C25 C23 C24 N5 178.1(2) . . . . ?
C22 C23 C24 C27 177.0(2) . . . . ?
C25 C23 C24 C27 -2.7(3) . . . . ?
C22 C23 C25 C26 -167.8(3) . . . . ?
C24 C23 C25 C26 11.8(4) . . . . ?
C23 C25 C26 C27 -16.4(4) . . . . ?
C29 O2 C27 C24 -174.0(3) . . . . ?
C29 O2 C27 C26 73.4(4) . . . . ?
N5 C24 C27 O2 52.2(3) . . . . ?
C23 C24 C27 O2 -127.0(3) . . . . ?
N5 C24 C27 C26 172.1(3) . . . . ?
C23 C24 C27 C26 -7.1(3) . . . . ?
C25 C26 C27 O2 132.0(3) . . . . ?
C25 C26 C27 C24 14.9(4) . . . . ?
C27 O2 C29 C30 -174.6(4) . . . . ?
C70 N54 C51 N51 4.1(4) . . . . ?
C70 N54 C51 C52 -176.92(18) . . . . ?
C54 N51 C51 N54 176.7(2) . . . . ?
C54 N51 C51 C52 -2.5(2) . . . . ?
N54 C51 C52 C55 4.0(4) . . . . ?
N51 C51 C52 C55 -176.7(2) . . . . ?
N54 C51 C52 C53 -177.42(19) . . . . ?
N51 C51 C52 C53 1.8(2) . . . . ?
C55 C52 C53 C58 -1.0(3) . . . . ?
C51 C52 C53 C58 -179.76(19) . . . . ?
C55 C52 C53 C54 178.20(19) . . . . ?
C51 C52 C53 C54 -0.5(2) . . . . ?
C59 N52 C54 N51 -0.2(4) . . . . ?
C59 N52 C54 C53 177.6(2) . . . . ?
C51 N51 C54 N52 -179.8(2) . . . . ?
C51 N51 C54 C53 2.1(2) . . . . ?
C58 C53 C54 N52 -0.1(4) . . . . ?
C52 C53 C54 N52 -179.2(2) . . . . ?
C58 C53 C54 N51 178.2(2) . . . . ?
C52 C53 C54 N51 -0.9(2) . . . . ?
C53 C52 C55 C56 1.7(3) . . . . ?
C51 C52 C55 C56 -179.9(2) . . . . ?
C52 C55 C56 C57 -1.2(3) . . . . ?
C52 C55 C56 C81 178.6(2) . . . . ?
C55 C56 C57 C58 -0.1(3) . . . . ?
C81 C56 C57 C58 -179.8(2) . . . . ?
C55 C56 C57 C82 -179.92(19) . . . . ?
C81 C56 C57 C82 0.3(3) . . . . ?
C52 C53 C58 C57 -0.3(3) . . . . ?
C54 C53 C58 C57 -179.3(2) . . . . ?
C56 C57 C58 C53 0.8(3) . . . . ?
C82 C57 C58 C53 -179.36(19) . . . . ?
C63 N53 C59 N52 179.2(2) . . . . ?
C63 N53 C59 C60 0.6(3) . . . . ?
C54 N52 C59 N53 10.0(3) . . . . ?
C54 N52 C59 C60 -171.2(2) . . . . ?
N53 C59 C60 C61 -0.3(4) . . . . ?
N52 C59 C60 C61 -179.1(2) . . . . ?
C59 C60 C61 C62 -1.1(4) . . . . ?
C59 C60 C61 C67 176.7(3) . . . . ?
C60 C61 C62 C63 2.2(4) . . . . ?
C67 C61 C62 C63 -175.6(3) . . . . ?
C60 C61 C62 C64 179.8(3) . . . . ?
C67 C61 C62 C64 2.0(5) . . . . ?
C59 N53 C63 C62 0.7(3) . . . . ?
C59 N53 C63 C66 -174.7(2) . . . . ?
C61 C62 C63 N53 -2.2(4) . . . . ?
C64 C62 C63 N53 179.9(3) . . . . ?
C61 C62 C63 C66 173.9(2) . . . . ?
C64 C62 C63 C66 -4.1(3) . . . . ?
C63 C62 C64 C65 -13.7(3) . . . . ?
C61 C62 C64 C65 168.6(3) . . . . ?
C62 C64 C65 C66 25.6(3) . . . . ?
C68 O51 C66 C63 -86.5(3) . . . . ?
C68 O51 C66 C65 160.0(3) . . . . ?
N53 C63 C66 O51 80.0(3) . . . . ?
C62 C63 C66 O51 -96.1(3) . . . . ?
N53 C63 C66 C65 -163.7(3) . . . . ?
C62 C63 C66 C65 20.3(3) . . . . ?
C64 C65 C66 O51 91.0(3) . . . . ?
C64 C65 C66 C63 -28.0(3) . . . . ?
C66 O51 C68 C69 174.3(2) . . . . ?
C74 N55 C70 N54 176.48(19) . . . . ?
C74 N55 C70 C71 -1.5(3) . . . . ?
C51 N54 C70 N55 8.8(3) . . . . ?
C51 N54 C70 C71 -173.10(19) . . . . ?
N55 C70 C71 C72 -0.2(3) . . . . ?
N54 C70 C71 C72 -178.32(19) . . . . ?
C70 C71 C72 C73 0.7(3) . . . . ?
C70 C71 C72 C78 178.9(2) . . . . ?
C71 C72 C73 C74 0.5(3) . . . . ?
C78 C72 C73 C74 -177.7(2) . . . . ?
C71 C72 C73 C75 179.7(2) . . . . ?
C78 C72 C73 C75 1.5(4) . . . . ?
C70 N55 C74 C73 2.9(3) . . . . ?
C70 N55 C74 C77 -174.0(2) . . . . ?
C72 C73 C74 N55 -2.5(3) . . . . ?
C75 C73 C74 N55 178.2(2) . . . . ?
C72 C73 C74 C77 174.71(19) . . . . ?
C75 C73 C74 C77 -4.6(3) . . . . ?
C74 C73 C75 C76 -4.3(3) . . . . ?
C72 C73 C75 C76 176.4(2) . . . . ?
C73 C75 C76 C77 11.4(3) . . . . ?
C79 O52 C77 C74 -79.6(3) . . . . ?
C79 O52 C77 C76 165.3(3) . . . . ?
N55 C74 C77 O52 71.4(3) . . . . ?
C73 C74 C77 O52 -105.8(2) . . . . ?
N55 C74 C77 C76 -171.1(2) . . . . ?
C73 C74 C77 C76 11.7(3) . . . . ?
C75 C76 C77 O52 106.2(3) . . . . ?
C75 C76 C77 C74 -13.8(3) . . . . ?
C77 O52 C79 C80 -176.4(3) . . . . ?

_diffrn_measured_fraction_theta_max 0.975
_diffrn_reflns_theta_full        66.97
_diffrn_measured_fraction_theta_full 0.985
_refine_diff_density_max         0.543
_refine_diff_density_min         -0.501
_refine_diff_density_rms         0.053
_audit_creation_date             
;
'Mon Nov 07 18:05:48 2011'
;
_cell_oxdiff_length_a            8.04522(17)
_cell_oxdiff_length_b            13.3300(3)
_cell_oxdiff_length_c            15.0284(3)
_cell_oxdiff_angle_alpha         89.4843(17)
_cell_oxdiff_angle_beta          74.9208(19)
_cell_oxdiff_angle_gamma         88.9335(17)
_cell_oxdiff_volume              1555.91(6)
_cell_oxdiff_measurement_reflns_used 40770
_diffrn_orient_matrix_UB_11      -0.1600368000
_diffrn_orient_matrix_UB_12      0.0698230000
_diffrn_orient_matrix_UB_13      0.0201299000
_diffrn_orient_matrix_UB_21      -0.1048854000
_diffrn_orient_matrix_UB_22      -0.0837792000
_diffrn_orient_matrix_UB_23      -0.0284447000
_diffrn_orient_matrix_UB_31      -0.0522292000
_diffrn_orient_matrix_UB_32      -0.0383056000
_diffrn_orient_matrix_UB_33      0.1002848000
_diffrn_measurement_details      
;
#__ type_ start__ end____ width___ exp.time_
  1 omega  -19.00   51.00   1.0000    4.0000
omega____ theta____ kappa____ phi______ frames
    -        0.0000   57.0000 -180.0000 70

#__ type_ start__ end____ width___ exp.time_
  2 omega  -24.00    1.00   1.0000    8.0000
omega____ theta____ kappa____ phi______ frames
    -      -26.0000  -76.0000 -138.0000 25

#__ type_ start__ end____ width___ exp.time_
  3 omega  -88.00  -61.00   1.0000    8.0000
omega____ theta____ kappa____ phi______ frames
    -      -34.0000  -77.0000  108.0000 27

#__ type_ start__ end____ width___ exp.time_
  4 omega  -30.00   -4.00   1.0000    8.0000
omega____ theta____ kappa____ phi______ frames
    -      -34.0000  -77.0000  108.0000 26

#__ type_ start__ end____ width___ exp.time_
  5 omega   12.00   37.00   1.0000    8.0000
omega____ theta____ kappa____ phi______ frames
    -       42.0000   79.0000  103.0000 25

#__ type_ start__ end____ width___ exp.time_
  6 omega  -60.00   24.00   1.0000    8.0000
omega____ theta____ kappa____ phi______ frames
    -      -42.5000   63.0000  -60.0000 84

#__ type_ start__ end____ width___ exp.time_
  7 omega -108.00  -81.00   1.0000    8.0000
omega____ theta____ kappa____ phi______ frames
    -      -42.5000  -57.0000  -90.0000 27

#__ type_ start__ end____ width___ exp.time_
  8 omega  -43.00  -17.00   1.0000    8.0000
omega____ theta____ kappa____ phi______ frames
    -      -42.5000  -38.0000  120.0000 26

#__ type_ start__ end____ width___ exp.time_
  9 omega -109.00  -84.00   1.0000    8.0000
omega____ theta____ kappa____ phi______ frames
    -      -42.5000  -38.0000  120.0000 25

#__ type_ start__ end____ width___ exp.time_
 10 omega  -59.00  -20.00   1.0000    8.0000
omega____ theta____ kappa____ phi______ frames
    -      -42.5000  -63.0000  -30.0000 39

#__ type_ start__ end____ width___ exp.time_
 11 omega  -50.00   30.00   1.0000    8.0000
omega____ theta____ kappa____ phi______ frames
    -      -42.5000   25.0000  120.0000 80

#__ type_ start__ end____ width___ exp.time_
 12 omega  -47.00  -21.00   1.0000    8.0000
omega____ theta____ kappa____ phi______ frames
    -      -42.5000  -57.0000  -90.0000 26

#__ type_ start__ end____ width___ exp.time_
 13 omega  -40.00  -14.00   1.0000    8.0000
omega____ theta____ kappa____ phi______ frames
    -      -42.5000  -77.0000  -90.0000 26

#__ type_ start__ end____ width___ exp.time_
 14 omega  -60.00  -16.00   1.0000    8.0000
omega____ theta____ kappa____ phi______ frames
    -      -42.5000  -77.0000   90.0000 44

#__ type_ start__ end____ width___ exp.time_
 15 omega   14.00   39.00   1.0000    8.0000
omega____ theta____ kappa____ phi______ frames
    -       46.0000   80.0000  -32.0000 25

#__ type_ start__ end____ width___ exp.time_
 16 omega   59.00   85.00   1.0000    8.0000
omega____ theta____ kappa____ phi______ frames
    -       46.0000   77.0000 -137.0000 26

#__ type_ start__ end____ width___ exp.time_
 17 omega   15.00   40.00   1.0000    8.0000
omega____ theta____ kappa____ phi______ frames
    -       46.0000   79.0000  -93.0000 25

#__ type_ start__ end____ width___ exp.time_
 18 omega   14.00   39.00   1.0000    8.0000
omega____ theta____ kappa____ phi______ frames
    -       46.0000   80.0000  129.0000 25

#__ type_ start__ end____ width___ exp.time_
 19 omega   24.00   51.00   1.0000    8.0000
omega____ theta____ kappa____ phi______ frames
    -       46.0000   77.0000 -137.0000 27

#__ type_ start__ end____ width___ exp.time_
 20 omega   14.00   43.00   1.0000    8.0000
omega____ theta____ kappa____ phi______ frames
    -       46.0000   80.0000   32.0000 29

#__ type_ start__ end____ width___ exp.time_
 21 omega   21.00   47.00   1.0000    8.0000
omega____ theta____ kappa____ phi______ frames
    -       50.0000   77.0000  171.0000 26

#__ type_ start__ end____ width___ exp.time_
 22 omega   19.00   45.00   1.0000    8.0000
omega____ theta____ kappa____ phi______ frames
    -       50.0000   78.0000  134.0000 26

#__ type_ start__ end____ width___ exp.time_
 23 omega   18.00   43.00   1.0000    8.0000
omega____ theta____ kappa____ phi______ frames
    -       50.0000   80.0000  -21.0000 25

#__ type_ start__ end____ width___ exp.time_
 24 omega   18.00   43.00   1.0000    8.0000
omega____ theta____ kappa____ phi______ frames
    -       50.0000   80.0000  -75.0000 25

#__ type_ start__ end____ width___ exp.time_
 25 omega   18.00   44.00   1.0000    8.0000
omega____ theta____ kappa____ phi______ frames
    -       50.0000   80.0000 -156.0000 26

#__ type_ start__ end____ width___ exp.time_
 26 omega   72.00  119.00   1.0000    8.0000
omega____ theta____ kappa____ phi______ frames
    -       50.0000   77.0000  171.0000 47

#__ type_ start__ end____ width___ exp.time_
 27 omega   18.00   43.00   1.0000    8.0000
omega____ theta____ kappa____ phi______ frames
    -       50.0000   80.0000   55.0000 25

#__ type_ start__ end____ width___ exp.time_
 28 omega   23.00   48.00   1.0000    8.0000
omega____ theta____ kappa____ phi______ frames
    -       54.0000   78.0000   46.0000 25

#__ type_ start__ end____ width___ exp.time_
 29 omega   23.00   48.00   1.0000    8.0000
omega____ theta____ kappa____ phi______ frames
    -       54.0000   78.0000  174.0000 25

#__ type_ start__ end____ width___ exp.time_
 30 omega   23.00   48.00   1.0000    8.0000
omega____ theta____ kappa____ phi______ frames
    -       54.0000   78.0000  -15.0000 25

#__ type_ start__ end____ width___ exp.time_
 31 omega   79.00  124.00   1.0000    8.0000
omega____ theta____ kappa____ phi______ frames
    -       54.0000   77.0000    9.0000 45

#__ type_ start__ end____ width___ exp.time_
 32 omega   33.00   65.00   1.0000    8.0000
omega____ theta____ kappa____ phi______ frames
    -       54.0000   77.0000    9.0000 32

#__ type_ start__ end____ width___ exp.time_
 33 omega   54.00   79.00   1.0000    8.0000
omega____ theta____ kappa____ phi______ frames
    -       55.1171  -80.0000 -144.0000 25

#__ type_ start__ end____ width___ exp.time_
 34 omega   -6.00   20.00   1.0000    8.0000
omega____ theta____ kappa____ phi______ frames
    -       55.1171  -80.0000 -144.0000 26

#__ type_ start__ end____ width___ exp.time_
 35 omega   80.00  105.00   1.0000    8.0000
omega____ theta____ kappa____ phi______ frames
    -       55.1171   77.0000   90.0000 25

#__ type_ start__ end____ width___ exp.time_
 36 omega   26.00   52.00   1.0000    8.0000
omega____ theta____ kappa____ phi______ frames
    -       55.1171   77.0000   90.0000 26

#__ type_ start__ end____ width___ exp.time_
 37 omega   29.00  128.00   1.0000    8.0000
omega____ theta____ kappa____ phi______ frames
    -       58.0000   76.0000  -62.0000 99

#__ type_ start__ end____ width___ exp.time_
 38 omega   29.00  127.00   1.0000    8.0000
omega____ theta____ kappa____ phi______ frames
    -       58.0000   77.0000   57.0000 98

#__ type_ start__ end____ width___ exp.time_
 39 omega  101.00  128.00   1.0000    8.0000
omega____ theta____ kappa____ phi______ frames
    -       58.0000   77.0000 -111.0000 27

#__ type_ start__ end____ width___ exp.time_
 40 omega   28.00   81.00   1.0000    8.0000
omega____ theta____ kappa____ phi______ frames
    -       58.0000   77.0000 -111.0000 53

#__ type_ start__ end____ width___ exp.time_
 41 omega   29.00  123.00   1.0000    8.0000
omega____ theta____ kappa____ phi______ frames
    -       58.0000   75.0000  141.0000 94

#__ type_ start__ end____ width___ exp.time_
 42 omega   87.00  118.00   1.0000    8.0000
omega____ theta____ kappa____ phi______ frames
    -       58.0000   76.0000  -22.0000 31

#__ type_ start__ end____ width___ exp.time_
 43 omega   32.00   67.00   1.0000    8.0000
omega____ theta____ kappa____ phi______ frames
    -       58.0000   76.0000  -22.0000 35

#__ type_ start__ end____ width___ exp.time_
 44 omega   -4.00   22.00   1.0000    8.0000
omega____ theta____ kappa____ phi______ frames
    -       66.0000  -79.0000   27.0000 26

#__ type_ start__ end____ width___ exp.time_
 45 omega   50.00   96.00   1.0000    8.0000
omega____ theta____ kappa____ phi______ frames
    -       66.0000  -79.0000   27.0000 46

#__ type_ start__ end____ width___ exp.time_
 46 omega    0.00   89.00   1.0000    8.0000
omega____ theta____ kappa____ phi______ frames
    -       70.0000  -80.0000  -35.0000 89

#__ type_ start__ end____ width___ exp.time_
 47 omega    7.00  109.00   1.0000    8.0000
omega____ theta____ kappa____ phi______ frames
    -       78.0000  -79.0000  161.0000 102

#__ type_ start__ end____ width___ exp.time_
 48 omega   81.00  107.00   1.0000    8.0000
omega____ theta____ kappa____ phi______ frames
    -       78.0000  -80.0000  111.0000 26

#__ type_ start__ end____ width___ exp.time_
 49 omega   54.00   91.00   1.0000    8.0000
omega____ theta____ kappa____ phi______ frames
    -       82.0000  -79.0000   81.0000 37

#__ type_ start__ end____ width___ exp.time_
 50 omega   78.00  104.00   1.0000   16.0000
omega____ theta____ kappa____ phi______ frames
    -      110.2342  -80.0000 -106.0000 26

#__ type_ start__ end____ width___ exp.time_
 51 omega  132.00  176.00   1.0000   16.0000
omega____ theta____ kappa____ phi______ frames
    -      110.2342   63.0000   30.0000 44

#__ type_ start__ end____ width___ exp.time_
 52 omega   88.00  122.00   1.0000   16.0000
omega____ theta____ kappa____ phi______ frames
    -      110.2342   63.0000   30.0000 34

#__ type_ start__ end____ width___ exp.time_
 53 omega   88.00  122.00   1.0000   16.0000
omega____ theta____ kappa____ phi______ frames
    -      110.2342   63.0000 -180.0000 34

#__ type_ start__ end____ width___ exp.time_
 54 omega   80.00  105.00   1.0000   16.0000
omega____ theta____ kappa____ phi______ frames
    -      110.2342   25.0000 -120.0000 25

#__ type_ start__ end____ width___ exp.time_
 55 omega   77.00  102.00   1.0000   16.0000
omega____ theta____ kappa____ phi______ frames
    -      110.2342   25.0000 -150.0000 25

#__ type_ start__ end____ width___ exp.time_
 56 omega  153.00  178.00   1.0000   16.0000
omega____ theta____ kappa____ phi______ frames
    -      110.2342   77.0000   60.0000 25

#__ type_ start__ end____ width___ exp.time_
 57 omega   81.00  107.00   1.0000   16.0000
omega____ theta____ kappa____ phi______ frames
    -      110.2342   77.0000   60.0000 26

#__ type_ start__ end____ width___ exp.time_
 58 omega  130.00  156.00   1.0000   16.0000
omega____ theta____ kappa____ phi______ frames
    -      110.2342   77.0000  120.0000 26

#__ type_ start__ end____ width___ exp.time_
 59 omega   81.00  106.00   1.0000   16.0000
omega____ theta____ kappa____ phi______ frames
    -      110.2342   77.0000  120.0000 25

#__ type_ start__ end____ width___ exp.time_
 60 omega   86.00  111.00   1.0000   16.0000
omega____ theta____ kappa____ phi______ frames
    -      110.2342   38.0000  120.0000 25

#__ type_ start__ end____ width___ exp.time_
 61 omega   85.00  118.00   1.0000   16.0000
omega____ theta____ kappa____ phi______ frames
    -      110.2342   38.0000   90.0000 33

#__ type_ start__ end____ width___ exp.time_
 62 omega   81.00  107.00   1.0000   16.0000
omega____ theta____ kappa____ phi______ frames
    -      110.2342   77.0000 -150.0000 26

#__ type_ start__ end____ width___ exp.time_
 63 omega   87.00  112.00   1.0000   16.0000
omega____ theta____ kappa____ phi______ frames
    -      110.2342   38.0000  -90.0000 25

#__ type_ start__ end____ width___ exp.time_
 64 omega  134.00  172.00   1.0000   16.0000
omega____ theta____ kappa____ phi______ frames
    -      110.2342   77.0000 -120.0000 38

#__ type_ start__ end____ width___ exp.time_
 65 omega   80.00  106.00   1.0000   16.0000
omega____ theta____ kappa____ phi______ frames
    -      110.2342   77.0000 -120.0000 26

#__ type_ start__ end____ width___ exp.time_
 66 omega  100.00  150.00   1.0000   16.0000
omega____ theta____ kappa____ phi______ frames
    -      110.2342   50.0000  -90.0000 50

#__ type_ start__ end____ width___ exp.time_
 67 omega   81.00  107.00   1.0000   16.0000
omega____ theta____ kappa____ phi______ frames
    -      110.2342   77.0000  150.0000 26

#__ type_ start__ end____ width___ exp.time_
 68 omega   90.00  116.00   1.0000   16.0000
omega____ theta____ kappa____ phi______ frames
    -      110.2342  -77.0000   60.0000 26

#__ type_ start__ end____ width___ exp.time_
 69 omega   80.00  105.00   1.0000   16.0000
omega____ theta____ kappa____ phi______ frames
    -      110.2342   77.0000  -90.0000 25

#__ type_ start__ end____ width___ exp.time_
 70 omega   86.00  112.00   1.0000   16.0000
omega____ theta____ kappa____ phi______ frames
    -      110.2342   38.0000  -30.0000 26

#__ type_ start__ end____ width___ exp.time_
 71 omega   88.00  116.00   1.0000   16.0000
omega____ theta____ kappa____ phi______ frames
    -      110.2342   50.0000  120.0000 28

#__ type_ start__ end____ width___ exp.time_
 72 omega   80.00  106.00   1.0000   16.0000
omega____ theta____ kappa____ phi______ frames
    -      110.2342   77.0000  -30.0000 26

#__ type_ start__ end____ width___ exp.time_
 73 omega   95.00  177.00   1.0000   16.0000
omega____ theta____ kappa____ phi______ frames
    -      110.2342   50.0000   60.0000 82

#__ type_ start__ end____ width___ exp.time_
 74 omega   89.00  178.00   1.0000   16.0000
omega____ theta____ kappa____ phi______ frames
    -      110.2342   63.0000  150.0000 89

#__ type_ start__ end____ width___ exp.time_
 75 omega   85.00  112.00   1.0000   16.0000
omega____ theta____ kappa____ phi______ frames
    -      110.2342   38.0000   60.0000 27

#__ type_ start__ end____ width___ exp.time_
 76 omega   80.00  106.00   1.0000   16.0000
omega____ theta____ kappa____ phi______ frames
    -      110.2342   77.0000    0.0000 26

#__ type_ start__ end____ width___ exp.time_
 77 omega   98.00  124.00   1.0000   16.0000
omega____ theta____ kappa____ phi______ frames
    -      110.2342   50.0000   30.0000 26

#__ type_ start__ end____ width___ exp.time_
 78 omega   99.00  138.00   1.0000   16.0000
omega____ theta____ kappa____ phi______ frames
    -      110.2342   50.0000    0.0000 39

#__ type_ start__ end____ width___ exp.time_
 79 omega   89.00  115.00   1.0000   16.0000
omega____ theta____ kappa____ phi______ frames
    -      110.2342   50.0000 -150.0000 26

#__ type_ start__ end____ width___ exp.time_
 80 omega   83.00  109.00   1.0000   16.0000
omega____ theta____ kappa____ phi______ frames
    -      110.2342   77.0000   90.0000 26

#__ type_ start__ end____ width___ exp.time_
 81 omega   91.00  117.00   1.0000   16.0000
omega____ theta____ kappa____ phi______ frames
    -      110.2342   50.0000 -180.0000 26

#__ type_ start__ end____ width___ exp.time_
 82 omega   90.00  116.00   1.0000   16.0000
omega____ theta____ kappa____ phi______ frames
    -      110.2342   63.0000 -150.0000 26

#__ type_ start__ end____ width___ exp.time_
 83 omega  124.00  150.00   1.0000   16.0000
omega____ theta____ kappa____ phi______ frames
    -      110.2342   77.0000  -60.0000 26

#__ type_ start__ end____ width___ exp.time_
 84 omega   80.00  105.00   1.0000   16.0000
omega____ theta____ kappa____ phi______ frames
    -      110.2342   77.0000   30.0000 25

#__ type_ start__ end____ width___ exp.time_
 85 omega   95.00  121.00   1.0000   16.0000
omega____ theta____ kappa____ phi______ frames
    -      110.2342   50.0000   90.0000 26

#__ type_ start__ end____ width___ exp.time_
 86 omega   89.00  114.00   1.0000   16.0000
omega____ theta____ kappa____ phi______ frames
    -      110.2342   50.0000  -60.0000 25

#__ type_ start__ end____ width___ exp.time_
 87 omega   80.00  106.00   1.0000   16.0000
omega____ theta____ kappa____ phi______ frames
    -      110.2342   77.0000  -60.0000 26

#__ type_ start__ end____ width___ exp.time_
 88 omega   93.00  119.00   1.0000   16.0000
omega____ theta____ kappa____ phi______ frames
    -      110.2342   25.0000 -180.0000 26

#__ type_ start__ end____ width___ exp.time_
 89 omega   86.00  140.00   1.0000   16.0000
omega____ theta____ kappa____ phi______ frames
    -      110.2342  -79.0000   27.0000 54

#__ type_ start__ end____ width___ exp.time_
 90 omega   85.00  127.00   1.0000   16.0000
omega____ theta____ kappa____ phi______ frames
    -      110.2342   38.0000    0.0000 42

#__ type_ start__ end____ width___ exp.time_
 91 omega   85.00  118.00   1.0000   16.0000
omega____ theta____ kappa____ phi______ frames
    -      110.2342   38.0000 -180.0000 33

#__ type_ start__ end____ width___ exp.time_
 92 omega   89.00  115.00   1.0000   16.0000
omega____ theta____ kappa____ phi______ frames
    -      110.2342   63.0000   60.0000 26

#__ type_ start__ end____ width___ exp.time_
 93 omega   91.00  117.00   1.0000   16.0000
omega____ theta____ kappa____ phi______ frames
    -      110.2342   50.0000 -120.0000 26

#__ type_ start__ end____ width___ exp.time_
 94 omega   95.00  151.00   1.0000   16.0000
omega____ theta____ kappa____ phi______ frames
    -      110.2342   50.0000  -30.0000 56

#__ type_ start__ end____ width___ exp.time_
 95 omega   39.00  142.00   1.0000   16.0000
omega____ theta____ kappa____ phi______ frames
    -      110.2342  -80.0000  157.0000 103

#__ type_ start__ end____ width___ exp.time_
 96 omega   88.00  178.00   1.0000   16.0000
omega____ theta____ kappa____ phi______ frames
    -      110.2342   63.0000  -30.0000 90

#__ type_ start__ end____ width___ exp.time_
 97 omega   88.00  177.00   1.0000   16.0000
omega____ theta____ kappa____ phi______ frames
    -      110.2342   63.0000  -90.0000 89

#__ type_ start__ end____ width___ exp.time_
 98 omega   73.00  140.00   1.0000   16.0000
omega____ theta____ kappa____ phi______ frames
    -      110.2342  -80.0000 -138.0000 67

#__ type_ start__ end____ width___ exp.time_
 99 omega   92.00  117.00   1.0000   16.0000
omega____ theta____ kappa____ phi______ frames
    -      110.2342   63.0000 -120.0000 25

#__ type_ start__ end____ width___ exp.time_
100 omega   91.00  116.00   1.0000   16.0000
omega____ theta____ kappa____ phi______ frames
    -      110.2342   63.0000  120.0000 25

#__ type_ start__ end____ width___ exp.time_
101 omega   85.00  112.00   1.0000   16.0000
omega____ theta____ kappa____ phi______ frames
    -      110.2342   38.0000 -150.0000 27

#__ type_ start__ end____ width___ exp.time_
102 omega   87.00  113.00   1.0000   16.0000
omega____ theta____ kappa____ phi______ frames
    -      110.2342   38.0000 -120.0000 26

#__ type_ start__ end____ width___ exp.time_
103 omega   40.00   66.00   1.0000   16.0000
omega____ theta____ kappa____ phi______ frames
    -      110.2342  -80.0000 -138.0000 26

#__ type_ start__ end____ width___ exp.time_
104 omega   89.00  177.00   1.0000   16.0000
omega____ theta____ kappa____ phi______ frames
    -      110.2342   63.0000   90.0000 88

#__ type_ start__ end____ width___ exp.time_
105 omega  139.00  165.00   1.0000   16.0000
omega____ theta____ kappa____ phi______ frames
    -      110.2342   63.0000  -60.0000 26

#__ type_ start__ end____ width___ exp.time_
106 omega   85.00  118.00   1.0000   16.0000
omega____ theta____ kappa____ phi______ frames
    -      110.2342   38.0000  150.0000 33

#__ type_ start__ end____ width___ exp.time_
107 omega   73.00   99.00   1.0000   16.0000
omega____ theta____ kappa____ phi______ frames
    -      110.2342  -80.0000  -78.0000 26

#__ type_ start__ end____ width___ exp.time_
108 omega   89.00  114.00   1.0000   16.0000
omega____ theta____ kappa____ phi______ frames
    -      110.2342   63.0000  -60.0000 25

#__ type_ start__ end____ width___ exp.time_
109 omega   88.00  177.00   1.0000   16.0000
omega____ theta____ kappa____ phi______ frames
    -      110.2342   63.0000    0.0000 89

#__ type_ start__ end____ width___ exp.time_
110 omega   85.00  120.00   1.0000   16.0000
omega____ theta____ kappa____ phi______ frames
    -      110.2342  -78.0000  114.0000 35

#__ type_ start__ end____ width___ exp.time_
111 omega  117.00  177.00   1.0000   16.0000
omega____ theta____ kappa____ phi______ frames
    -      110.2342   77.0000 -180.0000 60

#__ type_ start__ end____ width___ exp.time_
112 omega   80.00  106.00   1.0000   16.0000
omega____ theta____ kappa____ phi______ frames
    -      110.2342   77.0000 -180.0000 26

#__ type_ start__ end____ width___ exp.time_
113 omega   40.00  141.00   1.0000   16.0000
omega____ theta____ kappa____ phi______ frames
    -      110.2342  -80.0000  -20.0000 101

#__ type_ start__ end____ width___ exp.time_
114 omega  119.00  177.00   1.0000   16.0000
omega____ theta____ kappa____ phi______ frames
    -      110.2342   77.0000 -150.0000 58

#__ type_ start__ end____ width___ exp.time_
115 omega  112.00  138.00   1.0000   16.0000
omega____ theta____ kappa____ phi______ frames
    -      110.2342  -80.0000 -106.0000 26

#__ type_ start__ end____ width___ exp.time_
116 omega  -26.00   72.00   1.0000    4.0000
omega____ theta____ kappa____ phi______ frames
    -        0.0000   38.0000 -120.0000 98

#__ type_ start__ end____ width___ exp.time_
117 omega   14.00   46.00   1.0000    8.0000
omega____ theta____ kappa____ phi______ frames
    -       46.0000   80.0000  -32.0000 32

#__ type_ start__ end____ width___ exp.time_
118 omega   15.00   47.00   1.0000    8.0000
omega____ theta____ kappa____ phi______ frames
    -       46.0000   79.0000  -93.0000 32

#__ type_ start__ end____ width___ exp.time_
119 omega   14.00   46.00   1.0000    8.0000
omega____ theta____ kappa____ phi______ frames
    -       46.0000   80.0000   32.0000 32

#__ type_ start__ end____ width___ exp.time_
120 omega   14.00   46.00   1.0000    8.0000
omega____ theta____ kappa____ phi______ frames
    -       46.0000   80.0000  129.0000 32

#__ type_ start__ end____ width___ exp.time_
121 omega   18.00   46.00   1.0000    8.0000
omega____ theta____ kappa____ phi______ frames
    -       50.0000   80.0000   55.0000 28

#__ type_ start__ end____ width___ exp.time_
122 omega   19.00   49.00   1.0000    8.0000
omega____ theta____ kappa____ phi______ frames
    -       50.0000   78.0000  134.0000 30

#__ type_ start__ end____ width___ exp.time_
123 omega   18.00   46.00   1.0000    8.0000
omega____ theta____ kappa____ phi______ frames
    -       50.0000   80.0000  -21.0000 28

#__ type_ start__ end____ width___ exp.time_
124 omega   18.00   46.00   1.0000    8.0000
omega____ theta____ kappa____ phi______ frames
    -       50.0000   80.0000 -156.0000 28

#__ type_ start__ end____ width___ exp.time_
125 omega   23.00   49.00   1.0000    8.0000
omega____ theta____ kappa____ phi______ frames
    -       54.0000   78.0000   46.0000 26

#__ type_ start__ end____ width___ exp.time_
126 omega   24.00  124.00   1.0000    8.0000
omega____ theta____ kappa____ phi______ frames
    -       54.0000   77.0000    9.0000 100

#__ type_ start__ end____ width___ exp.time_
127 omega   23.00   49.00   1.0000    8.0000
omega____ theta____ kappa____ phi______ frames
    -       54.0000   78.0000  -15.0000 26

#__ type_ start__ end____ width___ exp.time_
128 omega   23.00   49.00   1.0000    8.0000
omega____ theta____ kappa____ phi______ frames
    -       54.0000   78.0000  -93.0000 26

#__ type_ start__ end____ width___ exp.time_
129 omega   23.00   49.00   1.0000    8.0000
omega____ theta____ kappa____ phi______ frames
    -       54.0000   78.0000  174.0000 26

#__ type_ start__ end____ width___ exp.time_
130 omega  -15.00   85.00   1.0000    8.0000
omega____ theta____ kappa____ phi______ frames
    -       55.1171  -77.0000 -150.0000 100

#__ type_ start__ end____ width___ exp.time_
131 omega   11.00  128.00   1.0000    8.0000
omega____ theta____ kappa____ phi______ frames
    -       55.1171   19.0000  -90.0000 117

#__ type_ start__ end____ width___ exp.time_
132 omega   11.00  128.00   1.0000    8.0000
omega____ theta____ kappa____ phi______ frames
    -       55.1171   19.0000  150.0000 117

#__ type_ start__ end____ width___ exp.time_
133 omega  -18.00   99.00   1.0000    8.0000
omega____ theta____ kappa____ phi______ frames
    -       55.1171  -19.0000   90.0000 117

#__ type_ start__ end____ width___ exp.time_
134 omega  -15.00   85.00   1.0000    8.0000
omega____ theta____ kappa____ phi______ frames
    -       55.1171  -77.0000  -30.0000 100

#__ type_ start__ end____ width___ exp.time_
135 omega   28.00  128.00   1.0000    8.0000
omega____ theta____ kappa____ phi______ frames
    -       58.0000   77.0000 -111.0000 100

#__ type_ start__ end____ width___ exp.time_
136 omega   29.00  128.00   1.0000    8.0000
omega____ theta____ kappa____ phi______ frames
    -       58.0000   76.0000  -22.0000 99

#__ type_ start__ end____ width___ exp.time_
137 omega   29.00  128.00   1.0000    8.0000
omega____ theta____ kappa____ phi______ frames
    -       58.0000   75.0000  141.0000 99

#__ type_ start__ end____ width___ exp.time_
138 omega   28.00  128.00   1.0000    8.0000
omega____ theta____ kappa____ phi______ frames
    -       58.0000   77.0000   57.0000 100

#__ type_ start__ end____ width___ exp.time_
139 omega   -1.00  101.00   1.0000    8.0000
omega____ theta____ kappa____ phi______ frames
    -       70.0000  -79.0000   52.0000 102

#__ type_ start__ end____ width___ exp.time_
140 omega   -1.00  102.00   1.0000    8.0000
omega____ theta____ kappa____ phi______ frames
    -       70.0000  -80.0000  -35.0000 103

#__ type_ start__ end____ width___ exp.time_
141 omega    7.00  110.00   1.0000    8.0000
omega____ theta____ kappa____ phi______ frames
    -       78.0000  -80.0000  111.0000 103

#__ type_ start__ end____ width___ exp.time_
142 omega   11.00  113.00   1.0000    8.0000
omega____ theta____ kappa____ phi______ frames
    -       82.0000  -79.0000   81.0000 102

#__ type_ start__ end____ width___ exp.time_
143 omega   37.00   94.00   1.0000   16.0000
omega____ theta____ kappa____ phi______ frames
    -      110.2342  -25.0000  -90.0000 57

#__ type_ start__ end____ width___ exp.time_
144 omega   37.00   94.00   1.0000   16.0000
omega____ theta____ kappa____ phi______ frames
    -      110.2342  -25.0000   60.0000 57

#__ type_ start__ end____ width___ exp.time_
145 omega   37.00   94.00   1.0000   16.0000
omega____ theta____ kappa____ phi______ frames
    -      110.2342  -25.0000 -150.0000 57

#__ type_ start__ end____ width___ exp.time_
146 omega   37.00   94.00   1.0000   16.0000
omega____ theta____ kappa____ phi______ frames
    -      110.2342  -25.0000  120.0000 57

#__ type_ start__ end____ width___ exp.time_
147 omega   85.00  150.00   1.0000   16.0000
omega____ theta____ kappa____ phi______ frames
    -      110.2342   38.0000   30.0000 65

#__ type_ start__ end____ width___ exp.time_
148 omega   40.00  140.00   1.0000   16.0000
omega____ theta____ kappa____ phi______ frames
    -      110.2342  -77.0000    0.0000 100

#__ type_ start__ end____ width___ exp.time_
149 omega   37.00   94.00   1.0000   16.0000
omega____ theta____ kappa____ phi______ frames
    -      110.2342  -25.0000    0.0000 57

;
_reflns_odcompleteness_completeness 98.52
_reflns_odcompleteness_theta     66.97
_reflns_odcompleteness_iscentric 1
_diffrn_measurement_device       '\k-geometry diffractometer'
_diffrn_detector                 'CCD plate'
_diffrn_detector_type            'Agilent EOS'
_diffrn_measurement_specimen_support 'polyimid foil'


#==end==


 
data_SS-11

_audit_creation_method           SHELXL-97
_audit_block_code                ga_ds40
_audit_block_refno               1262

_chemical_name_systematic        ?
_chemical_name_common            ?
_chemical_formula_moiety         ?
_chemical_formula_sum            'C30 H33 N5 O4'
_chemical_melting_point          ?

_exptl_crystal_description       irregular
_exptl_crystal_colour            red

_diffrn_ambient_temperature      100(2)
_chemical_formula_weight         527.61

loop_
_atom_type_symbol
_atom_type_description
_atom_type_scat_dispersion_real
_atom_type_scat_dispersion_imag
_atom_type_scat_source
C C 0.0033 0.0000 'International Tables Vol C Tables 4.2.6.8 and 6.1.1.4'
H H 0.0000 0.0000 'International Tables Vol C Tables 4.2.6.8 and 6.1.1.4'
N N 0.0061 0.0000 'International Tables Vol C Tables 4.2.6.8 and 6.1.1.4'
O O 0.0106 0.0000 'International Tables Vol C Tables 4.2.6.8 and 6.1.1.4'

_symmetry_cell_setting           monoclinic
_symmetry_space_group_name_H-M   'C 2'
_symmetry_int_tables_number      5

_chemical_absolute_configuration .

loop_
_symmetry_equiv_pos_as_xyz
'x, y, z'
'-x, y, -z'
'x+1/2, y+1/2, z'
'-x+1/2, y+1/2, -z'

_cell_length_a                   21.095(12)
_cell_length_b                   12.889(6)
_cell_length_c                   19.284(10)
_cell_angle_alpha                90.00
_cell_angle_beta                 95.881(10)
_cell_angle_gamma                90.00
_cell_volume                     5216(5)
_cell_formula_units_Z            8
_cell_measurement_temperature    100(2)
_cell_measurement_reflns_used    8172
_cell_measurement_theta_min      2.73
_cell_measurement_theta_max      32.13
_exptl_crystal_size_max          0.27
_exptl_crystal_size_mid          0.20
_exptl_crystal_size_min          0.20
_exptl_crystal_density_meas      ?
_exptl_crystal_density_diffrn    1.344
_exptl_crystal_density_method    'not measured'
_exptl_crystal_F_000             2240
_exptl_absorpt_coefficient_mu    0.091

_exptl_absorpt_correction_type   multi-scan
_exptl_absorpt_correction_T_min  0.8113
_exptl_absorpt_correction_T_max  0.8623
_exptl_absorpt_process_details   
;
multi-scan from symmetry-related measurements (Blessing 1995)
SADABS (Sheldrick & Bruker AXS, 2004-2008)
;

_exptl_special_details           
; 
 ? 
;
_diffrn_radiation_probe          x-ray
_diffrn_radiation_type           MoK\a
_diffrn_radiation_wavelength     0.71073
_diffrn_source                   'fine-focus sealed tube'
_diffrn_radiation_monochromator  graphite
_diffrn_measurement_device_type  'Bruker AXS Smart 1000'
_diffrn_measurement_method       '\f- and \w-scans'
_diffrn_detector_area_resol_mean 8.19
_diffrn_reflns_number            65021
_diffrn_reflns_av_R_equivalents  0.0451
_diffrn_reflns_av_sigmaI/netI    0.0321
_diffrn_reflns_limit_h_min       -31
_diffrn_reflns_limit_h_max       31
_diffrn_reflns_limit_k_min       -19
_diffrn_reflns_limit_k_max       19
_diffrn_reflns_limit_l_min       -28
_diffrn_reflns_limit_l_max       28
_diffrn_reflns_theta_min         1.85
_diffrn_reflns_theta_max         32.15
_reflns_number_total             9136
_reflns_number_gt                7390
_reflns_threshold_expression     >2sigma(I)
_computing_data_collection       'SMART-5.631 (Bruker AXS, 2003)'

_computing_cell_refinement       
;
SAINT (Bruker AXS, 1997-2008). Includes estimated systematic errors
 of the unit cell constants from Monte Carlo simulations.
;
_computing_data_reduction        'SAINT (Bruker AXS, 1997-2008); SADABS (Bruker AXS, 2008)'
_computing_structure_solution    'SUPERFLIP (Palatinus, 2007-2009)'
_computing_structure_refinement  'SHELXL-97 (Sheldrick, 1997)'
_computing_molecular_graphics    ?
_computing_publication_material  'SHELXL-97 (Sheldrick, 1997)'

_refine_special_details          
; 
 Refinement of F^2^ against ALL reflections.  The weighted R-factor wR and 
 goodness of fit S are based on F^2^, conventional R-factors R are based 
 on F, with F set to zero for negative F^2^. The threshold expression of 
 F^2^ > 2sigma(F^2^) is used only for calculating R-factors(gt) etc. and is 
 not relevant to the choice of reflections for refinement.  R-factors based 
 on F^2^ are statistically about twice as large as those based on F, and R- 
 factors based on ALL data will be even larger. 
 Geometry and ADP restraints applied to disordered groups.
;

_refine_ls_structure_factor_coef Fsqd
_refine_ls_matrix_type           full
_refine_ls_weighting_scheme      calc
_refine_ls_weighting_details     
'calc w=1/[\s^2^(Fo^2^)+(0.1227P)^2^+2.9312P] where P=(Fo^2^+2Fc^2^)/3'
_atom_sites_solution_primary     dual
_atom_sites_solution_secondary   difmap
_atom_sites_solution_hydrogens   geom

_refine_ls_hydrogen_treatment    constr
_refine_ls_extinction_method     none
_refine_ls_extinction_coef       ?
_refine_ls_abs_structure_details 'Flack H D (1983), Acta Cryst. A39, 876-881'
_refine_ls_abs_structure_Flack   .
_refine_ls_number_reflns         9136
_refine_ls_number_parameters     838
_refine_ls_number_restraints     65
_refine_ls_R_factor_all          0.0838
_refine_ls_R_factor_gt           0.0660
_refine_ls_wR_factor_ref         0.1899
_refine_ls_wR_factor_gt          0.1715
_refine_ls_goodness_of_fit_ref   1.026
_refine_ls_restrained_S_all      1.025
_refine_ls_shift/su_max          0.000
_refine_ls_shift/su_mean         0.000

loop_
_atom_site_label
_atom_site_type_symbol
_atom_site_fract_x
_atom_site_fract_y
_atom_site_fract_z
_atom_site_U_iso_or_equiv
_atom_site_adp_type
_atom_site_occupancy
_atom_site_symmetry_multiplicity
_atom_site_calc_flag
_atom_site_refinement_flags
_atom_site_disorder_assembly
_atom_site_disorder_group
O1 O -0.44091(10) -0.3098(2) -0.12324(10) 0.0334(5) Uani 1 1 d . . .
O2 O -0.39424(11) -0.2929(3) -0.00932(12) 0.0455(7) Uani 1 1 d . . .
N1 N -0.5000 -0.6583(2) 0.0000 0.0166(5) Uani 1 2 d S . .
H1 H -0.5000 -0.5901 0.0000 0.020 Uiso 1 2 calc SR . .
N2 N -0.53966(10) -0.69643(17) -0.12148(10) 0.0175(4) Uani 1 1 d . . .
N3 N -0.52540(10) -0.51130(17) -0.10987(10) 0.0185(4) Uani 1 1 d . . .
C1 C -0.51866(11) -0.71954(18) -0.05840(11) 0.0155(4) Uani 1 1 d . . .
C2 C -0.51109(10) -0.82814(18) -0.03537(11) 0.0149(4) Uani 1 1 d . . .
C3 C -0.52154(11) -0.9198(2) -0.07225(12) 0.0185(4) Uani 1 1 d . . .
H3 H -0.5356 -0.9195 -0.1207 0.022 Uiso 1 1 calc R . .
C4 C -0.51063(12) -1.0124(2) -0.03576(12) 0.0214(5) Uani 1 1 d . . .
H4 H -0.5177 -1.0766 -0.0596 0.026 Uiso 1 1 calc R . .
C9 C -0.54721(11) -0.59516(19) -0.14711(11) 0.0164(4) Uani 1 1 d . . .
C10 C -0.57702(11) -0.58857(19) -0.21572(11) 0.0167(4) Uani 1 1 d . . .
H10 H -0.5915 -0.6501 -0.2395 0.020 Uiso 1 1 calc R . .
C11 C -0.58549(11) -0.49359(19) -0.24908(11) 0.0171(4) Uani 1 1 d . . .
C12 C -0.56291(12) -0.4068(2) -0.21103(11) 0.0182(4) Uani 1 1 d . . .
C13 C -0.53343(11) -0.4203(2) -0.14316(11) 0.0183(4) Uani 1 1 d . . .
C14 C -0.56293(14) -0.2950(2) -0.23253(12) 0.0232(5) Uani 1 1 d . . .
H14A H -0.6057 -0.2730 -0.2533 0.028 Uiso 1 1 calc R . .
H14B H -0.5316 -0.2822 -0.2664 0.028 Uiso 1 1 calc R . .
C15 C -0.54371(15) -0.2380(2) -0.16273(13) 0.0273(6) Uani 1 1 d . . .
H15A H -0.5159 -0.1780 -0.1702 0.033 Uiso 1 1 calc R . .
H15B H -0.5820 -0.2127 -0.1423 0.033 Uiso 1 1 calc R . .
C16 C -0.50787(12) -0.3180(2) -0.11422(12) 0.0217(5) Uani 1 1 d . . .
H16 H -0.5161 -0.3081 -0.0645 0.026 Uiso 1 1 calc R . .
C17 C -0.61652(13) -0.4848(2) -0.32248(12) 0.0220(5) Uani 1 1 d . . .
H17A H -0.5838 -0.4723 -0.3541 0.033 Uiso 1 1 calc R . .
H17B H -0.6469 -0.4270 -0.3256 0.033 Uiso 1 1 calc R . .
H17C H -0.6391 -0.5494 -0.3356 0.033 Uiso 1 1 calc R . .
C18 C -0.40121(17) -0.3543(3) -0.0714(2) 0.0452(8) Uani 1 1 d . . .
H18A H -0.3588 -0.3647 -0.0880 0.054 Uiso 1 1 calc R . .
H18B H -0.4182 -0.4234 -0.0604 0.054 Uiso 1 1 calc R . .
C19 C -0.36162(16) -0.1987(3) -0.01756(19) 0.0426(8) Uani 1 1 d . . .
H19A H -0.3844 -0.1582 -0.0553 0.064 Uiso 1 1 calc R . .
H19B H -0.3183 -0.2135 -0.0290 0.064 Uiso 1 1 calc R . .
H19C H -0.3595 -0.1589 0.0259 0.064 Uiso 1 1 calc R . .
O21 O -1.06961(12) 0.6696(2) -0.38830(14) 0.0484(7) Uani 1 1 d . . .
O22 O -1.10270(12) 0.7286(2) -0.50136(13) 0.0453(7) Uani 1 1 d . . .
N21 N -1.0000 0.3281(2) -0.5000 0.0170(5) Uani 1 2 d S . .
H21 H -1.0000 0.3964 -0.5000 0.020 Uiso 1 2 calc SR . .
N22 N -0.96480(10) 0.29063(17) -0.37773(10) 0.0191(4) Uani 1 1 d . . .
N23 N -0.98149(11) 0.47502(18) -0.39062(11) 0.0220(4) Uani 1 1 d . . .
C21 C -0.98317(11) 0.26688(19) -0.44114(12) 0.0170(4) Uani 1 1 d . . .
C22 C -0.98995(11) 0.15813(19) -0.46446(11) 0.0166(4) Uani 1 1 d . . .
C23 C -0.98015(12) 0.0663(2) -0.42739(12) 0.0204(5) Uani 1 1 d . . .
H23 H -0.9671 0.0665 -0.3788 0.024 Uiso 1 1 calc R . .
C24 C -0.99020(13) -0.0261(2) -0.46411(13) 0.0236(5) Uani 1 1 d . . .
H24 H -0.9837 -0.0903 -0.4402 0.028 Uiso 1 1 calc R . .
C29 C -0.95927(12) 0.39262(19) -0.35253(12) 0.0188(4) Uani 1 1 d . . .
C30 C -0.93071(12) 0.4010(2) -0.28362(12) 0.0190(4) Uani 1 1 d . . .
H30 H -0.9153 0.3403 -0.2595 0.023 Uiso 1 1 calc R . .
C31 C -0.92471(12) 0.4963(2) -0.25041(12) 0.0211(5) Uani 1 1 d . . .
C32 C -0.94886(13) 0.5815(2) -0.28875(12) 0.0230(5) Uani 1 1 d . . .
C33 C -0.97568(13) 0.5664(2) -0.35709(12) 0.0222(5) Uani 1 1 d . . .
C34 C -0.95222(17) 0.6933(2) -0.26763(14) 0.0305(6) Uani 1 1 d . . .
H34A H -0.9104 0.7180 -0.2458 0.037 Uiso 1 1 calc R . .
H34B H -0.9846 0.7037 -0.2346 0.037 Uiso 1 1 calc R . .
C35 C -0.97117(18) 0.7496(2) -0.33688(15) 0.0346(7) Uani 1 1 d . . .
H35A H -0.9332 0.7804 -0.3550 0.041 Uiso 1 1 calc R . .
H35B H -1.0020 0.8057 -0.3302 0.041 Uiso 1 1 calc R . .
C36 C -1.00155(15) 0.6676(2) -0.38795(14) 0.0288(6) Uani 1 1 d . . .
H36 H -0.9886 0.6783 -0.4359 0.035 Uiso 1 1 calc R . .
C37 C -0.89416(14) 0.5074(2) -0.17695(13) 0.0266(5) Uani 1 1 d . . .
H37A H -0.9267 0.5260 -0.1463 0.040 Uiso 1 1 calc R . .
H37B H -0.8616 0.5619 -0.1751 0.040 Uiso 1 1 calc R . .
H37C H -0.8743 0.4415 -0.1615 0.040 Uiso 1 1 calc R . .
C38 C -1.10254(17) 0.6448(3) -0.4529(3) 0.0681(16) Uani 1 1 d . . .
H38A H -1.1471 0.6264 -0.4462 0.082 Uiso 1 1 calc R . .
H38B H -1.0825 0.5834 -0.4725 0.082 Uiso 1 1 calc R . .
C39 C -1.13894(17) 0.8117(3) -0.4813(2) 0.0438(8) Uani 1 1 d . . .
H39A H -1.1390 0.8672 -0.5161 0.066 Uiso 1 1 calc R . .
H39B H -1.1206 0.8378 -0.4359 0.066 Uiso 1 1 calc R . .
H39C H -1.1828 0.7886 -0.4779 0.066 Uiso 1 1 calc R . .
C54A C -0.1872(3) -0.9114(3) 0.4881(2) 0.0193(11) Uani 0.797(4) 1 d PDU A 1
H54A H -0.2111 -0.9195 0.5293 0.023 Uiso 0.797(4) 1 calc PR A 1
H54B H -0.1437 -0.9398 0.4989 0.023 Uiso 0.797(4) 1 calc PR A 1
C55A C -0.2222(2) -0.9642(3) 0.42323(17) 0.0249(7) Uani 0.797(4) 1 d PD A 1
H55A H -0.2045 -1.0342 0.4167 0.030 Uiso 0.797(4) 1 calc PR A 1
H55B H -0.2682 -0.9708 0.4284 0.030 Uiso 0.797(4) 1 calc PR A 1
C56A C -0.2119(3) -0.8946(4) 0.3608(3) 0.0179(10) Uani 0.797(4) 1 d PDU A 1
H56A H -0.2483 -0.8979 0.3233 0.021 Uiso 0.797(4) 1 calc PR A 1
C58A C -0.1421(3) -0.8852(4) 0.2695(4) 0.0210(13) Uani 0.797(4) 1 d PDU A 1
H58A H -0.1742 -0.8317 0.2544 0.025 Uiso 0.797(4) 1 calc PR A 1
H58B H -0.0993 -0.8530 0.2715 0.025 Uiso 0.797(4) 1 calc PR A 1
C59A C -0.0932(3) -1.0364(5) 0.2361(3) 0.0256(12) Uani 0.797(4) 1 d PDU A 1
H59A H -0.0965 -1.0935 0.2024 0.038 Uiso 0.797(4) 1 calc PR A 1
H59B H -0.0934 -1.0644 0.2834 0.038 Uiso 0.797(4) 1 calc PR A 1
H59C H -0.0534 -0.9985 0.2326 0.038 Uiso 0.797(4) 1 calc PR A 1
O41A O -0.15288(12) -0.9231(2) 0.33659(11) 0.0276(6) Uani 0.797(4) 1 d PD A 1
O42A O -0.14620(10) -0.96746(19) 0.22156(10) 0.0187(5) Uani 0.797(4) 1 d PD A 1
C54B C -0.1759(14) -0.9128(13) 0.4768(10) 0.028(4) Uani 0.203(4) 1 d PDU A 2
H54C H -0.2057 -0.9386 0.5093 0.033 Uiso 0.203(4) 1 calc PR A 2
H54D H -0.1319 -0.9261 0.4977 0.033 Uiso 0.203(4) 1 calc PR A 2
C55B C -0.1878(7) -0.9692(11) 0.4073(6) 0.023(3) Uani 0.203(4) 1 d PD A 2
H55C H -0.2151 -1.0308 0.4117 0.027 Uiso 0.203(4) 1 calc PR A 2
H55D H -0.1471 -0.9919 0.3909 0.027 Uiso 0.203(4) 1 calc PR A 2
C56B C -0.2218(14) -0.8892(13) 0.3558(9) 0.024(4) Uani 0.203(4) 1 d PDU A 2
H56B H -0.2690 -0.8999 0.3534 0.029 Uiso 0.203(4) 1 calc PR A 2
C58B C -0.1359(10) -0.8788(18) 0.282(2) 0.026(5) Uani 0.203(4) 1 d PDU A 2
H58C H -0.1334 -0.8377 0.2386 0.031 Uiso 0.203(4) 1 calc PR A 2
H58D H -0.1199 -0.8344 0.3214 0.031 Uiso 0.203(4) 1 calc PR A 2
C59B C -0.1076(13) -1.0306(19) 0.2207(10) 0.022(4) Uani 0.203(4) 1 d PDU A 2
H59D H -0.0769 -1.0877 0.2240 0.033 Uiso 0.203(4) 1 calc PR A 2
H59E H -0.1039 -0.9913 0.1778 0.033 Uiso 0.203(4) 1 calc PR A 2
H59F H -0.1509 -1.0586 0.2200 0.033 Uiso 0.203(4) 1 calc PR A 2
O41B O -0.2015(5) -0.9011(9) 0.2875(5) 0.028(2) Uani 0.203(4) 1 d PD A 2
O42B O -0.0949(5) -0.9634(9) 0.2797(5) 0.033(3) Uani 0.203(4) 1 d PD A 2
C65A C -0.3170(8) -0.9084(5) 0.0174(6) 0.0279(16) Uani 0.757(4) 1 d PDU B 3
H65A H -0.2811 -0.9254 -0.0100 0.033 Uiso 0.757(4) 1 calc PR B 3
H65B H -0.3576 -0.9256 -0.0105 0.033 Uiso 0.757(4) 1 calc PR B 3
C66A C -0.31061(19) -0.9677(3) 0.08918(18) 0.0231(7) Uani 0.757(4) 1 d PD B 3
H66A H -0.3531 -0.9880 0.1022 0.028 Uiso 0.757(4) 1 calc PR B 3
H66B H -0.2843 -1.0309 0.0866 0.028 Uiso 0.757(4) 1 calc PR B 3
C67A C -0.2780(3) -0.8899(4) 0.1430(3) 0.0171(9) Uani 0.757(4) 1 d PDU B 3
H67A H -0.2309 -0.9011 0.1452 0.021 Uiso 0.757(4) 1 calc PR B 3
C69A C -0.3598(5) -0.8734(5) 0.2219(3) 0.0187(13) Uani 0.757(4) 1 d PDU B 3
H69A H -0.3600 -0.8375 0.2673 0.022 Uiso 0.757(4) 1 calc PR B 3
H69B H -0.3763 -0.8243 0.1849 0.022 Uiso 0.757(4) 1 calc PR B 3
C70A C -0.3866(3) -1.0267(5) 0.2790(2) 0.0190(9) Uani 0.757(4) 1 d PDU B 3
H70A H -0.4165 -1.0851 0.2752 0.029 Uiso 0.757(4) 1 calc PR B 3
H70B H -0.3909 -0.9885 0.3222 0.029 Uiso 0.757(4) 1 calc PR B 3
H70C H -0.3429 -1.0529 0.2796 0.029 Uiso 0.757(4) 1 calc PR B 3
O43A O -0.29598(10) -0.90055(19) 0.21185(11) 0.0176(5) Uani 0.757(4) 1 d PD B 3
O44A O -0.40025(11) -0.95907(19) 0.22077(11) 0.0188(5) Uani 0.757(4) 1 d PD B 3
C65B C -0.324(3) -0.9078(13) 0.0174(17) 0.026(3) Uani 0.243(4) 1 d PDU B 4
H65C H -0.3117 -0.9199 -0.0301 0.031 Uiso 0.243(4) 1 calc PR B 4
H65D H -0.3684 -0.9314 0.0198 0.031 Uiso 0.243(4) 1 calc PR B 4
C66B C -0.2768(9) -0.9612(13) 0.0742(8) 0.044(4) Uani 0.243(4) 1 d PD B 4
H66C H -0.2881 -1.0346 0.0816 0.052 Uiso 0.243(4) 1 calc PR B 4
H66D H -0.2321 -0.9567 0.0631 0.052 Uiso 0.243(4) 1 calc PR B 4
C67B C -0.2886(10) -0.8936(12) 0.1360(11) 0.025(3) Uani 0.243(4) 1 d PDU B 4
H67B H -0.2522 -0.8999 0.1733 0.030 Uiso 0.243(4) 1 calc PR B 4
C69B C -0.3529(18) -0.8810(16) 0.2324(10) 0.020(3) Uani 0.243(4) 1 d PDU B 4
H69C H -0.3193 -0.8294 0.2470 0.024 Uiso 0.243(4) 1 calc PR B 4
H69D H -0.3949 -0.8473 0.2335 0.024 Uiso 0.243(4) 1 calc PR B 4
C70B C -0.3984(11) -1.0377(18) 0.2626(11) 0.031(4) Uani 0.243(4) 1 d PDU B 4
H70D H -0.3932 -1.0962 0.2951 0.047 Uiso 0.243(4) 1 calc PR B 4
H70E H -0.3980 -1.0633 0.2147 0.047 Uiso 0.243(4) 1 calc PR B 4
H70F H -0.4390 -1.0030 0.2673 0.047 Uiso 0.243(4) 1 calc PR B 4
O43B O -0.3457(5) -0.9178(10) 0.1631(4) 0.042(3) Uani 0.243(4) 1 d PD B 4
O44B O -0.3477(4) -0.9666(8) 0.2777(5) 0.035(2) Uani 0.243(4) 1 d PD B 4
N41 N -0.24528(10) -0.54941(19) 0.25179(10) 0.0225(5) Uani 1 1 d . . .
H41 H -0.2464 -0.6177 0.2517 0.027 Uiso 1 1 calc R . .
N42 N -0.20047(12) -0.51271(17) 0.37195(12) 0.0248(5) Uani 1 1 d . . .
N43 N -0.21059(10) -0.69803(17) 0.35953(11) 0.0194(4) Uani 1 1 d . . .
N44 N -0.28895(12) -0.5095(2) 0.13204(13) 0.0279(5) Uani 1 1 d . . .
N45 N -0.28267(10) -0.69485(19) 0.14312(11) 0.0214(4) Uani 1 1 d . . .
C41 C -0.22192(13) -0.4897(2) 0.30901(15) 0.0240(5) Uani 1 1 d . . .
C42 C -0.22775(15) -0.3809(2) 0.28668(16) 0.0297(6) Uani 1 1 d . . .
C43 C -0.25657(15) -0.3799(2) 0.21854(17) 0.0308(6) Uani 1 1 d . . .
C44 C -0.26662(13) -0.4876(2) 0.19475(15) 0.0249(5) Uani 1 1 d . . .
C45 C -0.20978(18) -0.2895(2) 0.3225(2) 0.0397(8) Uani 1 1 d . . .
H45 H -0.1893 -0.2904 0.3687 0.048 Uiso 1 1 calc R . .
C46 C -0.2235(2) -0.1972(3) 0.2867(2) 0.0519(11) Uani 1 1 d . . .
H46 H -0.2121 -0.1333 0.3092 0.062 Uiso 1 1 calc R . .
C47 C -0.2532(2) -0.1954(3) 0.2195(2) 0.0505(11) Uani 1 1 d . . .
H47 H -0.2617 -0.1305 0.1972 0.061 Uiso 1 1 calc R . .
C48 C -0.27107(18) -0.2868(3) 0.1833(2) 0.0413(8) Uani 1 1 d . . .
H48 H -0.2920 -0.2855 0.1373 0.050 Uiso 1 1 calc R . .
C49 C -0.19538(12) -0.6134(2) 0.39892(13) 0.0215(5) Uani 1 1 d . . .
C50 C -0.17333(13) -0.6187(2) 0.46997(14) 0.0240(5) Uani 1 1 d . . .
H50 H -0.1616 -0.5566 0.4945 0.029 Uiso 1 1 calc R . .
C51 C -0.16826(12) -0.7122(2) 0.50501(13) 0.0239(5) Uani 1 1 d . A .
C52 C -0.18552(12) -0.8000(2) 0.46526(12) 0.0201(5) Uani 1 1 d D . .
C53 C -0.20432(11) -0.7882(2) 0.39391(12) 0.0178(4) Uani 1 1 d D A .
C57 C -0.14511(15) -0.7189(3) 0.58123(13) 0.0301(6) Uani 1 1 d . . .
H57A H -0.1810 -0.7352 0.6078 0.045 Uiso 1 1 calc R A .
H57B H -0.1264 -0.6524 0.5970 0.045 Uiso 1 1 calc R . .
H57C H -0.1128 -0.7736 0.5885 0.045 Uiso 1 1 calc R . .
C60 C -0.29732(13) -0.6093(2) 0.10473(14) 0.0248(5) Uani 1 1 d . . .
C61 C -0.32176(13) -0.6137(3) 0.03399(14) 0.0287(6) Uani 1 1 d . . .
H61 H -0.3321 -0.5510 0.0095 0.034 Uiso 1 1 calc R . .
C62 C -0.33097(12) -0.7065(3) -0.00032(13) 0.0289(6) Uani 1 1 d . B .
C63 C -0.31524(12) -0.7961(3) 0.03896(13) 0.0248(5) Uani 1 1 d D . .
C64 C -0.29279(11) -0.7851(2) 0.10880(12) 0.0204(5) Uani 1 1 d D B .
C68 C -0.35646(15) -0.7129(3) -0.07602(14) 0.0408(8) Uani 1 1 d . . .
H68A H -0.3221 -0.7330 -0.1038 0.061 Uiso 1 1 calc R B .
H68B H -0.3733 -0.6450 -0.0917 0.061 Uiso 1 1 calc R . .
H68C H -0.3906 -0.7647 -0.0818 0.061 Uiso 1 1 calc R . .

loop_
_atom_site_aniso_label
_atom_site_aniso_U_11
_atom_site_aniso_U_22
_atom_site_aniso_U_33
_atom_site_aniso_U_23
_atom_site_aniso_U_13
_atom_site_aniso_U_12
O1 0.0264(10) 0.0458(13) 0.0289(9) -0.0138(9) 0.0063(7) -0.0115(9)
O2 0.0323(11) 0.0682(19) 0.0343(11) 0.0179(12) -0.0044(9) -0.0124(12)
N1 0.0190(12) 0.0187(14) 0.0119(11) 0.000 0.0002(9) 0.000
N2 0.0193(9) 0.0199(10) 0.0129(8) 0.0024(7) -0.0007(6) 0.0003(8)
N3 0.0219(9) 0.0213(11) 0.0121(8) -0.0004(7) 0.0004(7) -0.0020(8)
C1 0.0154(9) 0.0192(11) 0.0118(8) 0.0014(8) 0.0005(7) -0.0001(8)
C2 0.0141(9) 0.0179(11) 0.0120(9) 0.0006(7) -0.0011(7) 0.0011(8)
C3 0.0204(10) 0.0194(11) 0.0152(9) -0.0020(8) -0.0001(7) -0.0004(9)
C4 0.0256(12) 0.0190(12) 0.0194(11) -0.0011(9) 0.0015(9) -0.0002(9)
C9 0.0196(10) 0.0184(11) 0.0109(8) 0.0014(8) 0.0008(7) -0.0003(8)
C10 0.0187(10) 0.0193(11) 0.0115(9) 0.0000(8) -0.0006(7) -0.0020(8)
C11 0.0194(10) 0.0199(11) 0.0120(9) 0.0021(8) 0.0012(7) -0.0021(9)
C12 0.0225(11) 0.0180(11) 0.0140(9) 0.0022(8) 0.0007(7) -0.0029(9)
C13 0.0212(10) 0.0205(11) 0.0130(9) -0.0004(8) 0.0004(7) -0.0028(9)
C14 0.0351(13) 0.0188(11) 0.0151(10) 0.0025(9) 0.0003(9) -0.0051(10)
C15 0.0433(16) 0.0193(11) 0.0193(10) 0.0009(9) 0.0037(10) -0.0070(11)
C16 0.0252(12) 0.0232(12) 0.0169(10) -0.0026(9) 0.0026(8) -0.0064(9)
C17 0.0266(12) 0.0256(12) 0.0129(9) 0.0031(8) -0.0019(8) -0.0020(10)
C18 0.0306(16) 0.0325(16) 0.072(2) -0.0049(17) 0.0027(15) -0.0009(13)
C19 0.0312(15) 0.049(2) 0.0450(18) -0.0194(16) -0.0071(13) -0.0020(15)
O21 0.0384(13) 0.0560(17) 0.0543(15) 0.0281(13) 0.0221(11) 0.0208(12)
O22 0.0338(12) 0.0622(18) 0.0384(12) -0.0127(12) -0.0033(9) 0.0073(11)
N21 0.0210(13) 0.0169(13) 0.0129(11) 0.000 0.0003(9) 0.000
N22 0.0220(9) 0.0193(10) 0.0159(8) -0.0016(7) 0.0013(7) 0.0007(8)
N23 0.0281(11) 0.0218(11) 0.0164(9) 0.0004(8) 0.0039(7) 0.0055(9)
C21 0.0178(10) 0.0182(11) 0.0152(9) -0.0009(8) 0.0020(7) -0.0004(8)
C22 0.0162(10) 0.0163(10) 0.0172(10) 0.0007(8) 0.0015(8) -0.0007(8)
C23 0.0236(11) 0.0179(11) 0.0194(10) 0.0004(8) 0.0007(8) -0.0002(9)
C24 0.0301(13) 0.0179(12) 0.0228(12) 0.0033(9) 0.0026(10) 0.0010(9)
C29 0.0230(11) 0.0181(11) 0.0158(9) -0.0025(8) 0.0040(8) 0.0012(9)
C30 0.0213(11) 0.0199(11) 0.0159(10) -0.0008(8) 0.0022(8) 0.0007(9)
C31 0.0254(12) 0.0215(12) 0.0169(10) -0.0039(9) 0.0049(8) 0.0007(9)
C32 0.0332(13) 0.0203(12) 0.0165(10) -0.0015(9) 0.0076(9) 0.0031(10)
C33 0.0312(13) 0.0203(12) 0.0158(9) 0.0007(8) 0.0058(9) 0.0067(10)
C34 0.0512(18) 0.0200(12) 0.0213(11) -0.0027(10) 0.0086(11) 0.0075(12)
C35 0.055(2) 0.0242(14) 0.0244(12) -0.0006(11) 0.0052(12) 0.0108(13)
C36 0.0376(15) 0.0273(14) 0.0228(11) 0.0055(10) 0.0090(10) 0.0099(12)
C37 0.0311(13) 0.0326(14) 0.0156(10) -0.0071(10) 0.0006(9) 0.0033(11)
C38 0.0256(16) 0.0248(16) 0.153(5) -0.022(2) 0.007(2) -0.0030(13)
C39 0.0333(16) 0.0400(19) 0.057(2) 0.0150(17) -0.0025(14) 0.0017(14)
C54A 0.025(3) 0.0200(15) 0.0126(17) 0.0010(12) 0.0017(16) 0.0018(13)
C55A 0.037(2) 0.0183(14) 0.0184(13) 0.0021(12) -0.0033(13) -0.0024(14)
C56A 0.020(2) 0.0153(17) 0.0164(16) -0.0022(13) -0.0070(13) 0.0042(13)
C58A 0.0295(19) 0.0163(17) 0.016(3) -0.0016(16) -0.0013(17) 0.0023(14)
C59A 0.028(3) 0.027(2) 0.022(3) -0.004(2) 0.003(2) 0.0084(18)
O41A 0.0363(13) 0.0308(13) 0.0152(9) -0.0026(9) -0.0002(8) 0.0193(11)
O42A 0.0212(10) 0.0187(10) 0.0158(9) -0.0051(8) -0.0007(7) 0.0019(8)
C54B 0.026(8) 0.042(7) 0.017(7) 0.002(5) 0.012(6) 0.000(6)
C55B 0.030(7) 0.022(6) 0.016(5) 0.004(4) 0.001(5) 0.001(5)
C56B 0.028(8) 0.021(7) 0.022(7) 0.001(6) -0.002(6) 0.007(6)
C58B 0.034(7) 0.022(6) 0.021(10) -0.013(5) -0.005(6) 0.006(6)
C59B 0.033(11) 0.021(7) 0.011(7) 0.000(6) -0.005(6) -0.006(7)
O41B 0.028(5) 0.031(5) 0.023(4) 0.000(4) -0.010(3) -0.003(4)
O42B 0.045(6) 0.032(5) 0.020(4) -0.008(4) -0.005(4) 0.004(5)
C65A 0.022(4) 0.041(2) 0.0200(17) -0.0052(16) -0.0050(19) 0.0025(16)
C66A 0.0229(17) 0.0257(16) 0.0189(14) -0.0033(13) -0.0067(13) 0.0018(14)
C67A 0.017(2) 0.0195(15) 0.0134(16) -0.0009(12) -0.0069(14) 0.0002(13)
C69A 0.021(3) 0.0182(16) 0.016(2) 0.0035(14) -0.003(2) 0.0028(15)
C70A 0.026(2) 0.0169(19) 0.014(2) 0.0023(16) 0.0006(16) 0.0005(15)
O43A 0.0178(10) 0.0197(11) 0.0142(9) 0.0023(8) -0.0034(7) 0.0012(8)
O44A 0.0220(11) 0.0199(11) 0.0135(9) 0.0048(8) -0.0028(7) -0.0028(9)
C65B 0.019(6) 0.042(4) 0.016(4) -0.005(4) 0.000(4) 0.003(4)
C66B 0.048(9) 0.037(7) 0.040(7) -0.010(6) -0.020(7) -0.006(7)
C67B 0.024(5) 0.028(4) 0.021(4) 0.002(4) -0.006(4) -0.003(4)
C69B 0.020(5) 0.020(4) 0.018(5) 0.008(4) -0.008(5) 0.003(4)
C70B 0.046(8) 0.023(6) 0.023(8) 0.002(6) -0.001(6) -0.004(6)
O43B 0.050(6) 0.057(6) 0.018(4) 0.004(4) -0.010(3) -0.029(5)
O44B 0.042(5) 0.031(5) 0.032(4) 0.017(4) 0.004(4) 0.004(4)
N41 0.0272(11) 0.0146(10) 0.0267(11) 0.0034(7) 0.0076(9) 0.0009(8)
N42 0.0307(11) 0.0169(10) 0.0290(11) -0.0043(8) 0.0136(9) -0.0029(9)
N43 0.0206(9) 0.0172(9) 0.0208(9) -0.0020(8) 0.0040(7) 0.0011(8)
N44 0.0272(11) 0.0251(12) 0.0331(12) 0.0110(10) 0.0115(9) 0.0051(9)
N45 0.0195(9) 0.0237(10) 0.0208(9) 0.0051(8) 0.0019(7) 0.0012(8)
C41 0.0275(12) 0.0144(11) 0.0325(13) -0.0019(9) 0.0147(10) -0.0013(9)
C42 0.0353(14) 0.0161(12) 0.0415(16) 0.0035(11) 0.0225(12) 0.0021(11)
C43 0.0367(15) 0.0170(12) 0.0430(16) 0.0081(11) 0.0240(12) 0.0047(11)
C44 0.0266(12) 0.0181(12) 0.0320(13) 0.0080(10) 0.0126(10) 0.0035(10)
C45 0.057(2) 0.0178(13) 0.0498(18) -0.0053(12) 0.0307(16) -0.0045(13)
C46 0.086(3) 0.0170(13) 0.061(2) -0.0014(14) 0.050(2) -0.0008(17)
C47 0.077(3) 0.0161(13) 0.066(2) 0.0127(15) 0.042(2) 0.0125(16)
C48 0.054(2) 0.0229(14) 0.0519(19) 0.0144(14) 0.0298(16) 0.0104(14)
C49 0.0232(11) 0.0175(11) 0.0249(11) -0.0050(9) 0.0079(9) -0.0014(9)
C50 0.0274(12) 0.0226(12) 0.0228(11) -0.0096(10) 0.0060(9) -0.0060(10)
C51 0.0231(11) 0.0321(14) 0.0165(10) -0.0086(10) 0.0023(8) -0.0038(10)
C52 0.0212(11) 0.0209(11) 0.0180(10) -0.0027(9) 0.0015(8) -0.0012(9)
C53 0.0160(10) 0.0195(11) 0.0172(9) -0.0036(8) -0.0008(7) 0.0007(8)
C57 0.0349(14) 0.0375(16) 0.0178(11) -0.0079(11) 0.0024(10) -0.0044(12)
C60 0.0216(11) 0.0282(13) 0.0257(12) 0.0101(10) 0.0069(9) 0.0020(10)
C61 0.0249(12) 0.0391(16) 0.0227(12) 0.0144(11) 0.0059(9) 0.0075(11)
C62 0.0187(11) 0.0494(18) 0.0185(11) 0.0104(12) 0.0019(8) 0.0049(12)
C63 0.0184(11) 0.0374(15) 0.0184(10) 0.0028(10) 0.0012(8) 0.0047(10)
C64 0.0152(10) 0.0286(13) 0.0174(10) 0.0042(9) 0.0004(8) 0.0016(9)
C68 0.0331(15) 0.068(3) 0.0203(12) 0.0124(14) -0.0002(11) 0.0074(16)

_geom_special_details            
; 
 All esds (except the esd in the dihedral angle between two l.s. planes) 
 are estimated using the full covariance matrix.  The cell esds are taken 
 into account individually in the estimation of esds in distances, angles 
 and torsion angles; correlations between esds in cell parameters are only 
 used when they are defined by crystal symmetry.  An approximate (isotropic) 
 treatment of cell esds is used for estimating esds involving l.s. planes. 
;

loop_
_geom_bond_atom_site_label_1
_geom_bond_atom_site_label_2
_geom_bond_distance
_geom_bond_site_symmetry_2
_geom_bond_publ_flag
O1 C18 1.363(4) . ?
O1 C16 1.445(3) . ?
O2 C19 1.413(5) . ?
O2 C18 1.431(5) . ?
N1 C1 1.398(3) 2_455 ?
N1 C1 1.398(3) . ?
N1 H1 0.8800 . ?
N2 C1 1.286(3) . ?
N2 C9 1.399(3) . ?
N3 C13 1.340(3) . ?
N3 C9 1.352(3) . ?
C1 C2 1.472(3) . ?
C2 C3 1.385(3) . ?
C2 C2 1.396(4) 2_455 ?
C3 C4 1.393(3) . ?
C3 H3 0.9500 . ?
C4 C4 1.406(5) 2_455 ?
C4 H4 0.9500 . ?
C9 C10 1.408(3) . ?
C10 C11 1.386(3) . ?
C10 H10 0.9500 . ?
C11 C12 1.395(3) . ?
C11 C17 1.502(3) . ?
C12 C13 1.401(3) . ?
C12 C14 1.499(4) . ?
C13 C16 1.510(3) . ?
C14 C15 1.550(4) . ?
C14 H14A 0.9900 . ?
C14 H14B 0.9900 . ?
C15 C16 1.538(4) . ?
C15 H15A 0.9900 . ?
C15 H15B 0.9900 . ?
C16 H16 1.0000 . ?
C17 H17A 0.9800 . ?
C17 H17B 0.9800 . ?
C17 H17C 0.9800 . ?
C18 H18A 0.9900 . ?
C18 H18B 0.9900 . ?
C19 H19A 0.9800 . ?
C19 H19B 0.9800 . ?
C19 H19C 0.9800 . ?
O21 C38 1.400(6) . ?
O21 C36 1.435(4) . ?
O22 C39 1.393(5) . ?
O22 C38 1.427(6) . ?
N21 C21 1.398(3) 2_354 ?
N21 C21 1.398(3) . ?
N21 H21 0.8800 . ?
N22 C21 1.281(3) . ?
N22 C29 1.402(3) . ?
N23 C33 1.343(3) . ?
N23 C29 1.348(3) . ?
C21 C22 1.474(3) . ?
C22 C23 1.387(3) . ?
C22 C22 1.393(4) 2_354 ?
C23 C24 1.391(4) . ?
C23 H23 0.9500 . ?
C24 C24 1.403(5) 2_354 ?
C24 H24 0.9500 . ?
C29 C30 1.406(3) . ?
C30 C31 1.386(3) . ?
C30 H30 0.9500 . ?
C31 C32 1.391(4) . ?
C31 C37 1.502(3) . ?
C32 C33 1.394(3) . ?
C32 C34 1.501(4) . ?
C33 C36 1.512(4) . ?
C34 C35 1.536(4) . ?
C34 H34A 0.9900 . ?
C34 H34B 0.9900 . ?
C35 C36 1.540(4) . ?
C35 H35A 0.9900 . ?
C35 H35B 0.9900 . ?
C36 H36 1.0000 . ?
C37 H37A 0.9800 . ?
C37 H37B 0.9800 . ?
C37 H37C 0.9800 . ?
C38 H38A 0.9900 . ?
C38 H38B 0.9900 . ?
C39 H39A 0.9800 . ?
C39 H39B 0.9800 . ?
C39 H39C 0.9800 . ?
C54A C52 1.504(5) . ?
C54A C55A 1.543(6) . ?
C54A H54A 0.9900 . ?
C54A H54B 0.9900 . ?
C55A C56A 1.534(6) . ?
C55A H55A 0.9900 . ?
C55A H55B 0.9900 . ?
C56A O41A 1.422(6) . ?
C56A C53 1.513(5) . ?
C56A H56A 1.0000 . ?
C58A O42A 1.403(7) . ?
C58A O41A 1.423(7) . ?
C58A H58A 0.9900 . ?
C58A H58B 0.9900 . ?
C59A O42A 1.434(5) . ?
C59A H59A 0.9800 . ?
C59A H59B 0.9800 . ?
C59A H59C 0.9800 . ?
C54B C52 1.482(17) . ?
C54B C55B 1.523(16) . ?
C54B H54C 0.9900 . ?
C54B H54D 0.9900 . ?
C55B C56B 1.554(18) . ?
C55B H55C 0.9900 . ?
C55B H55D 0.9900 . ?
C56B O41B 1.435(17) . ?
C56B C53 1.521(17) . ?
C56B H56B 1.0000 . ?
C58B O42B 1.394(18) . ?
C58B O41B 1.430(19) . ?
C58B H58C 0.9900 . ?
C58B H58D 0.9900 . ?
C59B O42B 1.432(16) . ?
C59B H59D 0.9800 . ?
C59B H59E 0.9800 . ?
C59B H59F 0.9800 . ?
C65A C63 1.505(7) . ?
C65A C66A 1.575(11) . ?
C65A H65A 0.9900 . ?
C65A H65B 0.9900 . ?
C66A C67A 1.552(6) . ?
C66A H66A 0.9900 . ?
C66A H66B 0.9900 . ?
C67A O43A 1.425(5) . ?
C67A C64 1.521(6) . ?
C67A H67A 1.0000 . ?
C69A O44A 1.394(9) . ?
C69A O43A 1.424(9) . ?
C69A H69A 0.9900 . ?
C69A H69B 0.9900 . ?
C70A O44A 1.428(6) . ?
C70A H70A 0.9800 . ?
C70A H70B 0.9800 . ?
C70A H70C 0.9800 . ?
C65B C63 1.504(16) . ?
C65B C66B 1.563(19) . ?
C65B H65C 0.9900 . ?
C65B H65D 0.9900 . ?
C66B C67B 1.517(16) . ?
C66B H66C 0.9900 . ?
C66B H66D 0.9900 . ?
C67B O43B 1.396(16) . ?
C67B C64 1.494(16) . ?
C67B H67B 1.0000 . ?
C69B O44B 1.405(17) . ?
C69B O43B 1.441(18) . ?
C69B H69C 0.9900 . ?
C69B H69D 0.9900 . ?
C70B O44B 1.416(15) . ?
C70B H70D 0.9800 . ?
C70B H70E 0.9800 . ?
C70B H70F 0.9800 . ?
N41 C41 1.393(4) . ?
N41 C44 1.395(3) . ?
N41 H41 0.8800 . ?
N42 C41 1.286(4) . ?
N42 C49 1.398(3) . ?
N43 C53 1.338(3) . ?
N43 C49 1.349(3) . ?
N44 C44 1.284(4) . ?
N44 C60 1.394(4) . ?
N45 C64 1.344(4) . ?
N45 C60 1.347(3) . ?
C41 C42 1.469(4) . ?
C42 C43 1.390(5) . ?
C42 C45 1.398(4) . ?
C43 C48 1.397(4) . ?
C43 C44 1.471(4) . ?
C45 C46 1.391(5) . ?
C45 H45 0.9500 . ?
C46 C47 1.381(7) . ?
C46 H46 0.9500 . ?
C47 C48 1.400(6) . ?
C47 H47 0.9500 . ?
C48 H48 0.9500 . ?
C49 C50 1.403(4) . ?
C50 C51 1.380(4) . ?
C50 H50 0.9500 . ?
C51 C52 1.394(4) . ?
C51 C57 1.503(4) . ?
C52 C53 1.401(3) . ?
C57 H57A 0.9800 . ?
C57 H57B 0.9800 . ?
C57 H57C 0.9800 . ?
C60 C61 1.409(4) . ?
C61 C62 1.371(5) . ?
C61 H61 0.9500 . ?
C62 C63 1.403(4) . ?
C62 C68 1.505(4) . ?
C63 C64 1.389(3) . ?
C68 H68A 0.9800 . ?
C68 H68B 0.9800 . ?
C68 H68C 0.9800 . ?

loop_
_geom_angle_atom_site_label_1
_geom_angle_atom_site_label_2
_geom_angle_atom_site_label_3
_geom_angle
_geom_angle_site_symmetry_1
_geom_angle_site_symmetry_3
_geom_angle_publ_flag
C18 O1 C16 114.5(2) . . ?
C19 O2 C18 113.0(3) . . ?
C1 N1 C1 111.3(3) 2_455 . ?
C1 N1 H1 124.3 2_455 . ?
C1 N1 H1 124.3 . . ?
C1 N2 C9 124.5(2) . . ?
C13 N3 C9 115.22(19) . . ?
N2 C1 N1 132.3(2) . . ?
N2 C1 C2 121.4(2) . . ?
N1 C1 C2 106.3(2) . . ?
C3 C2 C2 121.45(13) . 2_455 ?
C3 C2 C1 130.5(2) . . ?
C2 C2 C1 108.05(12) 2_455 . ?
C2 C3 C4 117.5(2) . . ?
C2 C3 H3 121.2 . . ?
C4 C3 H3 121.2 . . ?
C3 C4 C4 121.01(14) . 2_455 ?
C3 C4 H4 119.5 . . ?
C4 C4 H4 119.5 2_455 . ?
N3 C9 N2 122.5(2) . . ?
N3 C9 C10 123.1(2) . . ?
N2 C9 C10 114.3(2) . . ?
C11 C10 C9 120.9(2) . . ?
C11 C10 H10 119.6 . . ?
C9 C10 H10 119.6 . . ?
C10 C11 C12 116.3(2) . . ?
C10 C11 C17 121.8(2) . . ?
C12 C11 C17 121.9(2) . . ?
C11 C12 C13 119.1(2) . . ?
C11 C12 C14 129.4(2) . . ?
C13 C12 C14 111.4(2) . . ?
N3 C13 C12 125.4(2) . . ?
N3 C13 C16 124.4(2) . . ?
C12 C13 C16 110.1(2) . . ?
C12 C14 C15 102.8(2) . . ?
C12 C14 H14A 111.2 . . ?
C15 C14 H14A 111.2 . . ?
C12 C14 H14B 111.2 . . ?
C15 C14 H14B 111.2 . . ?
H14A C14 H14B 109.1 . . ?
C16 C15 C14 106.2(2) . . ?
C16 C15 H15A 110.5 . . ?
C14 C15 H15A 110.5 . . ?
C16 C15 H15B 110.5 . . ?
C14 C15 H15B 110.5 . . ?
H15A C15 H15B 108.7 . . ?
O1 C16 C13 109.7(2) . . ?
O1 C16 C15 107.7(2) . . ?
C13 C16 C15 103.1(2) . . ?
O1 C16 H16 112.0 . . ?
C13 C16 H16 112.0 . . ?
C15 C16 H16 112.0 . . ?
C11 C17 H17A 109.5 . . ?
C11 C17 H17B 109.5 . . ?
H17A C17 H17B 109.5 . . ?
C11 C17 H17C 109.5 . . ?
H17A C17 H17C 109.5 . . ?
H17B C17 H17C 109.5 . . ?
O1 C18 O2 112.5(3) . . ?
O1 C18 H18A 109.1 . . ?
O2 C18 H18A 109.1 . . ?
O1 C18 H18B 109.1 . . ?
O2 C18 H18B 109.1 . . ?
H18A C18 H18B 107.8 . . ?
O2 C19 H19A 109.5 . . ?
O2 C19 H19B 109.5 . . ?
H19A C19 H19B 109.5 . . ?
O2 C19 H19C 109.5 . . ?
H19A C19 H19C 109.5 . . ?
H19B C19 H19C 109.5 . . ?
C38 O21 C36 113.9(3) . . ?
C39 O22 C38 111.4(3) . . ?
C21 N21 C21 111.2(3) 2_354 . ?
C21 N21 H21 124.4 2_354 . ?
C21 N21 H21 124.4 . . ?
C21 N22 C29 124.1(2) . . ?
C33 N23 C29 114.8(2) . . ?
N22 C21 N21 131.8(2) . . ?
N22 C21 C22 121.9(2) . . ?
N21 C21 C22 106.3(2) . . ?
C23 C22 C22 121.43(14) . 2_354 ?
C23 C22 C21 130.5(2) . . ?
C22 C22 C21 108.08(12) 2_354 . ?
C22 C23 C24 117.5(2) . . ?
C22 C23 H23 121.3 . . ?
C24 C23 H23 121.3 . . ?
C23 C24 C24 121.07(14) . 2_354 ?
C23 C24 H24 119.5 . . ?
C24 C24 H24 119.5 2_354 . ?
N23 C29 N22 122.5(2) . . ?
N23 C29 C30 123.1(2) . . ?
N22 C29 C30 114.3(2) . . ?
C31 C30 C29 121.0(2) . . ?
C31 C30 H30 119.5 . . ?
C29 C30 H30 119.5 . . ?
C30 C31 C32 116.3(2) . . ?
C30 C31 C37 122.0(2) . . ?
C32 C31 C37 121.7(2) . . ?
C31 C32 C33 118.9(2) . . ?
C31 C32 C34 129.7(2) . . ?
C33 C32 C34 111.4(2) . . ?
N23 C33 C32 125.9(2) . . ?
N23 C33 C36 123.7(2) . . ?
C32 C33 C36 110.3(2) . . ?
C32 C34 C35 103.5(2) . . ?
C32 C34 H34A 111.1 . . ?
C35 C34 H34A 111.1 . . ?
C32 C34 H34B 111.1 . . ?
C35 C34 H34B 111.1 . . ?
H34A C34 H34B 109.0 . . ?
C34 C35 C36 106.6(2) . . ?
C34 C35 H35A 110.4 . . ?
C36 C35 H35A 110.4 . . ?
C34 C35 H35B 110.4 . . ?
C36 C35 H35B 110.4 . . ?
H35A C35 H35B 108.6 . . ?
O21 C36 C33 109.8(2) . . ?
O21 C36 C35 109.9(3) . . ?
C33 C36 C35 103.4(2) . . ?
O21 C36 H36 111.2 . . ?
C33 C36 H36 111.2 . . ?
C35 C36 H36 111.2 . . ?
C31 C37 H37A 109.5 . . ?
C31 C37 H37B 109.5 . . ?
H37A C37 H37B 109.5 . . ?
C31 C37 H37C 109.5 . . ?
H37A C37 H37C 109.5 . . ?
H37B C37 H37C 109.5 . . ?
O21 C38 O22 112.2(3) . . ?
O21 C38 H38A 109.2 . . ?
O22 C38 H38A 109.2 . . ?
O21 C38 H38B 109.2 . . ?
O22 C38 H38B 109.2 . . ?
H38A C38 H38B 107.9 . . ?
O22 C39 H39A 109.5 . . ?
O22 C39 H39B 109.5 . . ?
H39A C39 H39B 109.5 . . ?
O22 C39 H39C 109.5 . . ?
H39A C39 H39C 109.5 . . ?
H39B C39 H39C 109.5 . . ?
C52 C54A C55A 102.0(3) . . ?
C52 C54A H54A 111.4 . . ?
C55A C54A H54A 111.4 . . ?
C52 C54A H54B 111.4 . . ?
C55A C54A H54B 111.4 . . ?
H54A C54A H54B 109.2 . . ?
C56A C55A C54A 106.5(3) . . ?
C56A C55A H55A 110.4 . . ?
C54A C55A H55A 110.4 . . ?
C56A C55A H55B 110.4 . . ?
C54A C55A H55B 110.4 . . ?
H55A C55A H55B 108.6 . . ?
O41A C56A C53 108.3(4) . . ?
O41A C56A C55A 107.8(4) . . ?
C53 C56A C55A 102.5(3) . . ?
O41A C56A H56A 112.5 . . ?
C53 C56A H56A 112.5 . . ?
C55A C56A H56A 112.5 . . ?
O42A C58A O41A 109.6(4) . . ?
O42A C58A H58A 109.8 . . ?
O41A C58A H58A 109.8 . . ?
O42A C58A H58B 109.8 . . ?
O41A C58A H58B 109.8 . . ?
H58A C58A H58B 108.2 . . ?
O42A C59A H59A 109.5 . . ?
O42A C59A H59B 109.5 . . ?
H59A C59A H59B 109.5 . . ?
O42A C59A H59C 109.5 . . ?
H59A C59A H59C 109.5 . . ?
H59B C59A H59C 109.5 . . ?
C56A O41A C58A 116.0(3) . . ?
C58A O42A C59A 110.1(4) . . ?
C52 C54B C55B 109.2(14) . . ?
C52 C54B H54C 109.8 . . ?
C55B C54B H54C 109.8 . . ?
C52 C54B H54D 109.8 . . ?
C55B C54B H54D 109.8 . . ?
H54C C54B H54D 108.3 . . ?
C54B C55B C56B 105.6(13) . . ?
C54B C55B H55C 110.6 . . ?
C56B C55B H55C 110.6 . . ?
C54B C55B H55D 110.6 . . ?
C56B C55B H55D 110.6 . . ?
H55C C55B H55D 108.8 . . ?
O41B C56B C53 117.0(15) . . ?
O41B C56B C55B 110.7(15) . . ?
C53 C56B C55B 100.7(13) . . ?
O41B C56B H56B 109.3 . . ?
C53 C56B H56B 109.3 . . ?
C55B C56B H56B 109.3 . . ?
O42B C58B O41B 117.0(18) . . ?
O42B C58B H58C 108.1 . . ?
O41B C58B H58C 108.1 . . ?
O42B C58B H58D 108.1 . . ?
O41B C58B H58D 108.1 . . ?
H58C C58B H58D 107.3 . . ?
O42B C59B H59D 109.5 . . ?
O42B C59B H59E 109.5 . . ?
H59D C59B H59E 109.5 . . ?
O42B C59B H59F 109.5 . . ?
H59D C59B H59F 109.5 . . ?
H59E C59B H59F 109.5 . . ?
C58B O41B C56B 116(2) . . ?
C58B O42B C59B 115.3(19) . . ?
C63 C65A C66A 103.1(6) . . ?
C63 C65A H65A 111.1 . . ?
C66A C65A H65A 111.1 . . ?
C63 C65A H65B 111.1 . . ?
C66A C65A H65B 111.1 . . ?
H65A C65A H65B 109.1 . . ?
C67A C66A C65A 105.4(4) . . ?
C67A C66A H66A 110.7 . . ?
C65A C66A H66A 110.7 . . ?
C67A C66A H66B 110.7 . . ?
C65A C66A H66B 110.7 . . ?
H66A C66A H66B 108.8 . . ?
O43A C67A C64 115.3(4) . . ?
O43A C67A C66A 114.7(4) . . ?
C64 C67A C66A 103.1(4) . . ?
O43A C67A H67A 107.8 . . ?
C64 C67A H67A 107.8 . . ?
C66A C67A H67A 107.8 . . ?
O44A C69A O43A 112.9(4) . . ?
O44A C69A H69A 109.0 . . ?
O43A C69A H69A 109.0 . . ?
O44A C69A H69B 109.0 . . ?
O43A C69A H69B 109.0 . . ?
H69A C69A H69B 107.8 . . ?
O44A C70A H70A 109.5 . . ?
O44A C70A H70B 109.5 . . ?
H70A C70A H70B 109.5 . . ?
O44A C70A H70C 109.5 . . ?
H70A C70A H70C 109.5 . . ?
H70B C70A H70C 109.5 . . ?
C69A O43A C67A 116.7(4) . . ?
C69A O44A C70A 113.4(4) . . ?
C63 C65B C66B 100.2(14) . . ?
C63 C65B H65C 111.7 . . ?
C66B C65B H65C 111.7 . . ?
C63 C65B H65D 111.7 . . ?
C66B C65B H65D 111.7 . . ?
H65C C65B H65D 109.5 . . ?
C67B C66B C65B 98.8(19) . . ?
C67B C66B H66C 112.0 . . ?
C65B C66B H66C 112.0 . . ?
C67B C66B H66D 112.0 . . ?
C65B C66B H66D 112.0 . . ?
H66C C66B H66D 109.7 . . ?
O43B C67B C64 108.6(13) . . ?
O43B C67B C66B 112.6(17) . . ?
C64 C67B C66B 105.7(13) . . ?
O43B C67B H67B 110.0 . . ?
C64 C67B H67B 110.0 . . ?
C66B C67B H67B 110.0 . . ?
O44B C69B O43B 108.0(14) . . ?
O44B C69B H69C 110.1 . . ?
O43B C69B H69C 110.1 . . ?
O44B C69B H69D 110.1 . . ?
O43B C69B H69D 110.1 . . ?
H69C C69B H69D 108.4 . . ?
O44B C70B H70D 109.5 . . ?
O44B C70B H70E 109.5 . . ?
H70D C70B H70E 109.5 . . ?
O44B C70B H70F 109.5 . . ?
H70D C70B H70F 109.5 . . ?
H70E C70B H70F 109.5 . . ?
C67B O43B C69B 116.8(18) . . ?
C69B O44B C70B 111.8(19) . . ?
C41 N41 C44 111.6(3) . . ?
C41 N41 H41 124.2 . . ?
C44 N41 H41 124.2 . . ?
C41 N42 C49 124.8(2) . . ?
C53 N43 C49 114.7(2) . . ?
C44 N44 C60 125.4(2) . . ?
C64 N45 C60 115.0(2) . . ?
N42 C41 N41 133.0(2) . . ?
N42 C41 C42 120.5(3) . . ?
N41 C41 C42 106.4(3) . . ?
C43 C42 C45 121.9(3) . . ?
C43 C42 C41 107.6(2) . . ?
C45 C42 C41 130.5(3) . . ?
C42 C43 C48 121.3(3) . . ?
C42 C43 C44 108.7(2) . . ?
C48 C43 C44 129.9(3) . . ?
N44 C44 N41 132.4(3) . . ?
N44 C44 C43 121.9(3) . . ?
N41 C44 C43 105.6(3) . . ?
C46 C45 C42 116.3(4) . . ?
C46 C45 H45 121.8 . . ?
C42 C45 H45 121.8 . . ?
C47 C46 C45 122.1(3) . . ?
C47 C46 H46 119.0 . . ?
C45 C46 H46 119.0 . . ?
C46 C47 C48 121.8(3) . . ?
C46 C47 H47 119.1 . . ?
C48 C47 H47 119.1 . . ?
C43 C48 C47 116.5(4) . . ?
C43 C48 H48 121.8 . . ?
C47 C48 H48 121.8 . . ?
N43 C49 N42 122.4(2) . . ?
N43 C49 C50 123.1(2) . . ?
N42 C49 C50 114.4(2) . . ?
C51 C50 C49 121.5(2) . . ?
C51 C50 H50 119.3 . . ?
C49 C50 H50 119.3 . . ?
C50 C51 C52 115.9(2) . . ?
C50 C51 C57 122.0(2) . . ?
C52 C51 C57 122.1(3) . . ?
C51 C52 C53 119.0(2) . . ?
C51 C52 C54B 133.6(9) . . ?
C53 C52 C54B 105.9(8) . . ?
C51 C52 C54A 128.9(3) . . ?
C53 C52 C54A 112.2(3) . . ?
C54B C52 C54A 13.0(10) . . ?
N43 C53 C52 125.7(2) . . ?
N43 C53 C56A 125.3(3) . . ?
C52 C53 C56A 108.9(3) . . ?
N43 C53 C56B 119.8(7) . . ?
C52 C53 C56B 114.3(7) . . ?
C56A C53 C56B 8.8(11) . . ?
C51 C57 H57A 109.5 . . ?
C51 C57 H57B 109.5 . . ?
H57A C57 H57B 109.5 . . ?
C51 C57 H57C 109.5 . . ?
H57A C57 H57C 109.5 . . ?
H57B C57 H57C 109.5 . . ?
N45 C60 N44 122.3(2) . . ?
N45 C60 C61 122.7(3) . . ?
N44 C60 C61 115.0(2) . . ?
C62 C61 C60 121.5(3) . . ?
C62 C61 H61 119.3 . . ?
C60 C61 H61 119.3 . . ?
C61 C62 C63 116.4(2) . . ?
C61 C62 C68 122.3(3) . . ?
C63 C62 C68 121.3(3) . . ?
C64 C63 C62 118.5(3) . . ?
C64 C63 C65B 112.7(10) . . ?
C62 C63 C65B 128.6(9) . . ?
C64 C63 C65A 111.3(4) . . ?
C62 C63 C65A 130.2(4) . . ?
C65B C63 C65A 6(3) . . ?
N45 C64 C63 126.0(3) . . ?
N45 C64 C67B 129.5(9) . . ?
C63 C64 C67B 104.3(9) . . ?
N45 C64 C67A 122.7(3) . . ?
C63 C64 C67A 111.3(3) . . ?
C67B C64 C67A 9.6(11) . . ?
C62 C68 H68A 109.5 . . ?
C62 C68 H68B 109.5 . . ?
H68A C68 H68B 109.5 . . ?
C62 C68 H68C 109.5 . . ?
H68A C68 H68C 109.5 . . ?
H68B C68 H68C 109.5 . . ?

loop_
_geom_torsion_atom_site_label_1
_geom_torsion_atom_site_label_2
_geom_torsion_atom_site_label_3
_geom_torsion_atom_site_label_4
_geom_torsion
_geom_torsion_site_symmetry_1
_geom_torsion_site_symmetry_2
_geom_torsion_site_symmetry_3
_geom_torsion_site_symmetry_4
_geom_torsion_publ_flag
C9 N2 C1 N1 1.9(4) . . . . ?
C9 N2 C1 C2 -179.1(2) . . . . ?
C1 N1 C1 N2 178.9(3) 2_455 . . . ?
C1 N1 C1 C2 -0.18(10) 2_455 . . . ?
N2 C1 C2 C3 2.1(4) . . . . ?
N1 C1 C2 C3 -178.6(2) . . . . ?
N2 C1 C2 C2 -178.8(2) . . . 2_455 ?
N1 C1 C2 C2 0.5(3) . . . 2_455 ?
C2 C2 C3 C4 1.6(4) 2_455 . . . ?
C1 C2 C3 C4 -179.4(2) . . . . ?
C2 C3 C4 C4 -0.4(4) . . . 2_455 ?
C13 N3 C9 N2 176.6(2) . . . . ?
C13 N3 C9 C10 -0.7(3) . . . . ?
C1 N2 C9 N3 8.6(4) . . . . ?
C1 N2 C9 C10 -173.8(2) . . . . ?
N3 C9 C10 C11 0.1(4) . . . . ?
N2 C9 C10 C11 -177.4(2) . . . . ?
C9 C10 C11 C12 0.1(3) . . . . ?
C9 C10 C11 C17 179.3(2) . . . . ?
C10 C11 C12 C13 0.3(3) . . . . ?
C17 C11 C12 C13 -178.9(2) . . . . ?
C10 C11 C12 C14 178.0(2) . . . . ?
C17 C11 C12 C14 -1.3(4) . . . . ?
C9 N3 C13 C12 1.2(4) . . . . ?
C9 N3 C13 C16 -174.5(2) . . . . ?
C11 C12 C13 N3 -1.1(4) . . . . ?
C14 C12 C13 N3 -179.1(2) . . . . ?
C11 C12 C13 C16 175.2(2) . . . . ?
C14 C12 C13 C16 -2.8(3) . . . . ?
C11 C12 C14 C15 169.4(3) . . . . ?
C13 C12 C14 C15 -12.8(3) . . . . ?
C12 C14 C15 C16 23.2(3) . . . . ?
C18 O1 C16 C13 -85.5(3) . . . . ?
C18 O1 C16 C15 163.1(3) . . . . ?
N3 C13 C16 O1 79.2(3) . . . . ?
C12 C13 C16 O1 -97.1(2) . . . . ?
N3 C13 C16 C15 -166.3(2) . . . . ?
C12 C13 C16 C15 17.4(3) . . . . ?
C14 C15 C16 O1 91.1(2) . . . . ?
C14 C15 C16 C13 -24.8(3) . . . . ?
C16 O1 C18 O2 -76.1(3) . . . . ?
C19 O2 C18 O1 -67.5(4) . . . . ?
C29 N22 C21 N21 2.0(4) . . . . ?
C29 N22 C21 C22 -178.2(2) . . . . ?
C21 N21 C21 N22 179.7(3) 2_354 . . . ?
C21 N21 C21 C22 -0.10(11) 2_354 . . . ?
N22 C21 C22 C23 1.0(4) . . . . ?
N21 C21 C22 C23 -179.2(2) . . . . ?
N22 C21 C22 C22 -179.6(2) . . . 2_354 ?
N21 C21 C22 C22 0.3(3) . . . 2_354 ?
C22 C22 C23 C24 1.0(4) 2_354 . . . ?
C21 C22 C23 C24 -179.7(2) . . . . ?
C22 C23 C24 C24 -0.3(5) . . . 2_354 ?
C33 N23 C29 N22 176.2(2) . . . . ?
C33 N23 C29 C30 -1.5(4) . . . . ?
C21 N22 C29 N23 9.7(4) . . . . ?
C21 N22 C29 C30 -172.4(2) . . . . ?
N23 C29 C30 C31 1.0(4) . . . . ?
N22 C29 C30 C31 -176.9(2) . . . . ?
C29 C30 C31 C32 0.6(4) . . . . ?
C29 C30 C31 C37 -179.7(2) . . . . ?
C30 C31 C32 C33 -1.4(4) . . . . ?
C37 C31 C32 C33 178.9(2) . . . . ?
C30 C31 C32 C34 177.4(3) . . . . ?
C37 C31 C32 C34 -2.3(4) . . . . ?
C29 N23 C33 C32 0.6(4) . . . . ?
C29 N23 C33 C36 -175.5(2) . . . . ?
C31 C32 C33 N23 0.9(4) . . . . ?
C34 C32 C33 N23 -178.2(3) . . . . ?
C31 C32 C33 C36 177.4(2) . . . . ?
C34 C32 C33 C36 -1.6(3) . . . . ?
C31 C32 C34 C35 169.0(3) . . . . ?
C33 C32 C34 C35 -12.1(3) . . . . ?
C32 C34 C35 C36 20.7(3) . . . . ?
C38 O21 C36 C33 -99.5(3) . . . . ?
C38 O21 C36 C35 147.4(3) . . . . ?
N23 C33 C36 O21 74.0(3) . . . . ?
C32 C33 C36 O21 -102.7(3) . . . . ?
N23 C33 C36 C35 -168.8(3) . . . . ?
C32 C33 C36 C35 14.6(3) . . . . ?
C34 C35 C36 O21 95.5(3) . . . . ?
C34 C35 C36 C33 -21.6(3) . . . . ?
C36 O21 C38 O22 -76.3(4) . . . . ?
C39 O22 C38 O21 -67.9(4) . . . . ?
C52 C54A C55A C56A 24.1(5) . . . . ?
C54A C55A C56A O41A 85.7(4) . . . . ?
C54A C55A C56A C53 -28.5(5) . . . . ?
C53 C56A O41A C58A -84.3(5) . . . . ?
C55A C56A O41A C58A 165.5(4) . . . . ?
O42A C58A O41A C56A -108.4(4) . . . . ?
O41A C58A O42A C59A -69.4(5) . . . . ?
C52 C54B C55B C56B -14(2) . . . . ?
C54B C55B C56B O41B 143.7(17) . . . . ?
C54B C55B C56B C53 19(2) . . . . ?
O42B C58B O41B C56B 101(3) . . . . ?
C53 C56B O41B C58B 50(2) . . . . ?
C55B C56B O41B C58B -65(2) . . . . ?
O41B C58B O42B C59B 64(3) . . . . ?
C63 C65A C66A C67A -23.3(10) . . . . ?
C65A C66A C67A O43A 148.7(7) . . . . ?
C65A C66A C67A C64 22.5(8) . . . . ?
O44A C69A O43A C67A 97.5(5) . . . . ?
C64 C67A O43A C69A 51.2(6) . . . . ?
C66A C67A O43A C69A -68.4(5) . . . . ?
O43A C69A O44A C70A 68.1(5) . . . . ?
C63 C65B C66B C67B 38(3) . . . . ?
C65B C66B C67B O43B 77(2) . . . . ?
C65B C66B C67B C64 -42(2) . . . . ?
C64 C67B O43B C69B -80.9(19) . . . . ?
C66B C67B O43B C69B 162.5(15) . . . . ?
O44B C69B O43B C67B -107(2) . . . . ?
O43B C69B O44B C70B -65(3) . . . . ?
C49 N42 C41 N41 0.3(5) . . . . ?
C49 N42 C41 C42 177.5(2) . . . . ?
C44 N41 C41 N42 176.5(3) . . . . ?
C44 N41 C41 C42 -1.0(3) . . . . ?
N42 C41 C42 C43 -175.5(3) . . . . ?
N41 C41 C42 C43 2.4(3) . . . . ?
N42 C41 C42 C45 4.3(4) . . . . ?
N41 C41 C42 C45 -177.8(3) . . . . ?
C45 C42 C43 C48 -2.3(5) . . . . ?
C41 C42 C43 C48 177.4(3) . . . . ?
C45 C42 C43 C44 177.3(3) . . . . ?
C41 C42 C43 C44 -2.9(3) . . . . ?
C60 N44 C44 N41 -0.2(5) . . . . ?
C60 N44 C44 C43 177.1(3) . . . . ?
C41 N41 C44 N44 176.9(3) . . . . ?
C41 N41 C44 C43 -0.8(3) . . . . ?
C42 C43 C44 N44 -175.6(3) . . . . ?
C48 C43 C44 N44 4.0(5) . . . . ?
C42 C43 C44 N41 2.4(3) . . . . ?
C48 C43 C44 N41 -178.1(3) . . . . ?
C43 C42 C45 C46 1.3(4) . . . . ?
C41 C42 C45 C46 -178.4(3) . . . . ?
C42 C45 C46 C47 0.0(5) . . . . ?
C45 C46 C47 C48 -0.2(6) . . . . ?
C42 C43 C48 C47 2.0(5) . . . . ?
C44 C43 C48 C47 -177.5(3) . . . . ?
C46 C47 C48 C43 -0.8(5) . . . . ?
C53 N43 C49 N42 -178.5(2) . . . . ?
C53 N43 C49 C50 1.4(3) . . . . ?
C41 N42 C49 N43 2.7(4) . . . . ?
C41 N42 C49 C50 -177.2(2) . . . . ?
N43 C49 C50 C51 -2.7(4) . . . . ?
N42 C49 C50 C51 177.2(2) . . . . ?
C49 C50 C51 C52 0.8(4) . . . . ?
C49 C50 C51 C57 -179.6(2) . . . . ?
C50 C51 C52 C53 2.0(4) . . . . ?
C57 C51 C52 C53 -177.5(2) . . . . ?
C50 C51 C52 C54B 165.9(14) . . . . ?
C57 C51 C52 C54B -13.7(15) . . . . ?
C50 C51 C52 C54A -178.0(4) . . . . ?
C57 C51 C52 C54A 2.4(5) . . . . ?
C55B C54B C52 C51 -163.3(9) . . . . ?
C55B C54B C52 C53 2(2) . . . . ?
C55B C54B C52 C54A 123(6) . . . . ?
C55A C54A C52 C51 169.6(3) . . . . ?
C55A C54A C52 C53 -10.5(4) . . . . ?
C55A C54A C52 C54B -74(5) . . . . ?
C49 N43 C53 C52 1.8(3) . . . . ?
C49 N43 C53 C56A -173.6(4) . . . . ?
C49 N43 C53 C56B 178.2(12) . . . . ?
C51 C52 C53 N43 -3.6(4) . . . . ?
C54B C52 C53 N43 -171.5(12) . . . . ?
C54A C52 C53 N43 176.5(3) . . . . ?
C51 C52 C53 C56A 172.4(3) . . . . ?
C54B C52 C53 C56A 4.5(12) . . . . ?
C54A C52 C53 C56A -7.5(4) . . . . ?
C51 C52 C53 C56B 179.8(12) . . . . ?
C54B C52 C53 C56B 11.9(16) . . . . ?
C54A C52 C53 C56B -0.2(12) . . . . ?
O41A C56A C53 N43 84.5(4) . . . . ?
C55A C56A C53 N43 -161.7(3) . . . . ?
O41A C56A C53 C52 -91.5(3) . . . . ?
C55A C56A C53 C52 22.2(5) . . . . ?
O41A C56A C53 C56B 139(6) . . . . ?
C55A C56A C53 C56B -108(6) . . . . ?
O41B C56B C53 N43 43(2) . . . . ?
C55B C56B C53 N43 163.1(9) . . . . ?
O41B C56B C53 C52 -140.0(13) . . . . ?
C55B C56B C53 C52 -20.0(17) . . . . ?
O41B C56B C53 C56A -87(7) . . . . ?
C55B C56B C53 C56A 33(5) . . . . ?
C64 N45 C60 N44 -179.2(2) . . . . ?
C64 N45 C60 C61 0.3(3) . . . . ?
C44 N44 C60 N45 0.5(4) . . . . ?
C44 N44 C60 C61 -179.0(2) . . . . ?
N45 C60 C61 C62 -1.2(4) . . . . ?
N44 C60 C61 C62 178.4(2) . . . . ?
C60 C61 C62 C63 0.5(4) . . . . ?
C60 C61 C62 C68 -179.4(2) . . . . ?
C61 C62 C63 C64 1.0(4) . . . . ?
C68 C62 C63 C64 -179.1(2) . . . . ?
C61 C62 C63 C65B 176(3) . . . . ?
C68 C62 C63 C65B -4(3) . . . . ?
C61 C62 C63 C65A -177.3(10) . . . . ?
C68 C62 C63 C65A 2.6(10) . . . . ?
C66B C65B C63 C64 -24(4) . . . . ?
C66B C65B C63 C62 161.5(12) . . . . ?
C66B C65B C63 C65A 53(15) . . . . ?
C66A C65A C63 C64 15.5(11) . . . . ?
C66A C65A C63 C62 -166.1(3) . . . . ?
C66A C65A C63 C65B -90(18) . . . . ?
C60 N45 C64 C63 1.3(4) . . . . ?
C60 N45 C64 C67B -172.8(10) . . . . ?
C60 N45 C64 C67A 178.9(3) . . . . ?
C62 C63 C64 N45 -2.0(4) . . . . ?
C65B C63 C64 N45 -177(2) . . . . ?
C65A C63 C64 N45 176.6(8) . . . . ?
C62 C63 C64 C67B 173.3(8) . . . . ?
C65B C63 C64 C67B -2(3) . . . . ?
C65A C63 C64 C67B -8.1(11) . . . . ?
C62 C63 C64 C67A -179.8(3) . . . . ?
C65B C63 C64 C67A 5(2) . . . . ?
C65A C63 C64 C67A -1.2(8) . . . . ?
O43B C67B C64 N45 82.6(17) . . . . ?
C66B C67B C64 N45 -156.4(10) . . . . ?
O43B C67B C64 C63 -92.5(13) . . . . ?
C66B C67B C64 C63 28.5(15) . . . . ?
O43B C67B C64 C67A 129(6) . . . . ?
C66B C67B C64 C67A -110(5) . . . . ?
O43A C67A C64 N45 42.4(5) . . . . ?
C66A C67A C64 N45 168.3(3) . . . . ?
O43A C67A C64 C63 -139.7(3) . . . . ?
C66A C67A C64 C63 -13.8(4) . . . . ?
O43A C67A C64 C67B -96(5) . . . . ?
C66A C67A C64 C67B 30(5) . . . . ?

_diffrn_measured_fraction_theta_max 0.958
_diffrn_reflns_theta_full        31.00
_diffrn_measured_fraction_theta_full 0.993
_refine_diff_density_max         0.810
_refine_diff_density_min         -0.305
_refine_diff_density_rms         0.085

_diffrn_ambient_environment      'perfluoro polyether oil'
_diffrn_measurement_device       'three-circle diffractometer'
_diffrn_measurement_specimen_support 'polyimid foil'
_diffrn_detector                 'CCD plate'
_diffrn_detector_type            CCD-PXL-KAF2


#==end==


data_RR-12
_audit_creation_method
;
CrysAlisPro, Oxford Diffraction Ltd.,
Version 1.171.35.19 (release 27-10-2011 CrysAlis171 .NET)
(compiled Oct 27 2011,15:02:11)
;
_audit_block_code                ga_ds47a
_audit_block_refno               1368
_audit_update_record             'Mon Nov 14 11:01:50 CET 2011'


_chemical_name_systematic        ?
_chemical_name_common            ?
_chemical_formula_moiety         ?
_chemical_formula_sum            'C40 H37 N5 O2'
_chemical_melting_point          ?

_exptl_crystal_description       irregular
_exptl_crystal_colour            yellow
_diffrn_ambient_temperature      119.94(18)
_chemical_formula_weight         619.75

loop_
_atom_type_symbol
_atom_type_description
_atom_type_scat_dispersion_real
_atom_type_scat_dispersion_imag
_atom_type_scat_source
C C 0.0181 0.0091 'International Tables Vol C Tables 4.2.6.8 and 6.1.1.4'
H H 0.0000 0.0000 'International Tables Vol C Tables 4.2.6.8 and 6.1.1.4'
N N 0.0311 0.0180 'International Tables Vol C Tables 4.2.6.8 and 6.1.1.4'
O O 0.0492 0.0322 'International Tables Vol C Tables 4.2.6.8 and 6.1.1.4'

_symmetry_cell_setting           monoclinic
_symmetry_space_group_name_H-M   'P 21'
_symmetry_int_tables_number      4
_chemical_absolute_configuration ad

loop_
_symmetry_equiv_pos_as_xyz
'x, y, z'
'-x, y+1/2, -z'

_cell_length_a                   18.41594(17)
_cell_length_b                   14.02690(11)
_cell_length_c                   25.7679(2)
_cell_angle_alpha                90.00
_cell_angle_beta                 102.0747(9)
_cell_angle_gamma                90.00
_cell_volume                     6509.05(10)
_cell_formula_units_Z            8
_cell_measurement_temperature    119.94(18)
_cell_measurement_reflns_used    120849
_cell_measurement_theta_min      3.5052
_cell_measurement_theta_max      71.8859
_exptl_crystal_size_max          0.21
_exptl_crystal_size_mid          0.14
_exptl_crystal_size_min          0.11
_exptl_crystal_density_meas      ?
_exptl_crystal_density_diffrn    1.265
_exptl_crystal_density_method    'not measured'
_exptl_crystal_F_000             2624
_exptl_absorpt_coefficient_mu    0.626
_exptl_absorpt_correction_type   multi-scan
_exptl_absorpt_correction_T_min  0.79595
_exptl_absorpt_correction_T_max  1.00000
_exptl_absorpt_process_details
;
CrysAlisPro, Agilent Technologies,
Version 1.171.35.19 (release 27-10-2011 CrysAlis171 .NET)
(compiled Oct 27 2011,15:02:11)
Empirical absorption correction using spherical harmonics,
 implemented in SCALE3 ABSPACK scaling algorithm.
;

_exptl_special_details
;
 ?
;
_diffrn_radiation_probe          x-ray
_diffrn_radiation_type           'Cu K\a'
_diffrn_radiation_wavelength     1.5418
_diffrn_source                   'Agilent SuperNova (Cu) X-ray Source'
_diffrn_radiation_monochromator  mirror
_diffrn_measurement_device_type  'Agilent SuperNova, Dual, Cu at zero, Eos'
_diffrn_measurement_method       '\w scans'
_diffrn_detector_area_resol_mean 15.9241
_diffrn_reflns_number            214499
_diffrn_reflns_av_R_equivalents  0.0360
_diffrn_reflns_av_sigmaI/netI    0.0597
_diffrn_reflns_limit_h_min       -22
_diffrn_reflns_limit_h_max       22
_diffrn_reflns_limit_k_min       -17
_diffrn_reflns_limit_k_max       17
_diffrn_reflns_limit_l_min       -31
_diffrn_reflns_limit_l_max       31
_diffrn_reflns_theta_min         3.5052
_diffrn_reflns_theta_max         71.8859
_reflns_number_total             25387
_reflns_number_gt                24973
_reflns_threshold_expression     >2sigma(I)
_computing_data_collection
;
CrysAlisPro, Agilent Technologies,
Version 1.171.35.19 (release 27-10-2011 CrysAlis171 .NET)
(compiled Oct 27 2011,15:02:11)
;
_computing_cell_refinement
;
CrysAlisPro, Agilent Technologies,
Version 1.171.35.19 (release 27-10-2011 CrysAlis171 .NET)
(compiled Oct 27 2011,15:02:11)
;
_computing_data_reduction
;
CrysAlisPro, Agilent Technologies,
Version 1.171.35.19 (release 27-10-2011 CrysAlis171 .NET)
(compiled Oct 27 2011,15:02:11)
;
_computing_structure_solution    'SUPERFLIP (Palatinus, 2007-2009)'
_computing_structure_refinement  'SHELXL-97 (Sheldrick, 1997)'
_computing_molecular_graphics    ?
_computing_publication_material  'SHELXL-97 (Sheldrick, 1997)'

_refine_special_details
;
 Refinement of F^2^ against ALL reflections.  The weighted R-factor wR and
 goodness of fit S are based on F^2^, conventional R-factors R are based
 on F, with F set to zero for negative F^2^. The threshold expression of
 F^2^ > 2sigma(F^2^) is used only for calculating R-factors(gt) etc. and is
 not relevant to the choice of reflections for refinement.  R-factors based
 on F^2^ are statistically about twice as large as those based on F, and R-
 factors based on ALL data will be even larger.
;

_refine_ls_structure_factor_coef Fsqd
_refine_ls_matrix_type           full
_refine_ls_weighting_scheme      calc
_refine_ls_weighting_details
'calc w=1/[\s^2^(Fo^2^)+(0.0496P)^2^+1.0470P] where P=(Fo^2^+2Fc^2^)/3'
_atom_sites_solution_primary     dual
_atom_sites_solution_secondary   difmap
_atom_sites_solution_hydrogens   geom
_refine_ls_hydrogen_treatment    mixed
_refine_ls_extinction_method     none
_refine_ls_extinction_coef       ?
_refine_ls_abs_structure_details 'Flack H D (1983), Acta Cryst. A39, 876-881'
_refine_ls_abs_structure_Flack   0.01(7)
_refine_ls_number_reflns         25387
_refine_ls_number_parameters     1754
_refine_ls_number_restraints     51
_refine_ls_R_factor_all          0.0309
_refine_ls_R_factor_gt           0.0304
_refine_ls_wR_factor_ref         0.0778
_refine_ls_wR_factor_gt          0.0772
_refine_ls_goodness_of_fit_ref   1.018
_refine_ls_restrained_S_all      1.017
_refine_ls_shift/su_max          0.001
_refine_ls_shift/su_mean         0.000

loop_
_atom_site_label
_atom_site_type_symbol
_atom_site_fract_x
_atom_site_fract_y
_atom_site_fract_z
_atom_site_U_iso_or_equiv
_atom_site_adp_type
_atom_site_occupancy
_atom_site_symmetry_multiplicity
_atom_site_calc_flag
_atom_site_refinement_flags
_atom_site_disorder_assembly
_atom_site_disorder_group
O1 O 0.86136(5) 0.22132(6) 0.51723(3) 0.02017(17) Uani 1 1 d . . .
O2 O 0.73488(5) 0.48444(6) 0.50628(3) 0.02061(17) Uani 1 1 d . . .
N1 N 0.80793(5) 0.43437(8) 0.68517(4) 0.0184(2) Uani 1 1 d . . .
H1 H 0.7978(8) 0.4251(11) 0.6521(7) 0.022 Uiso 1 1 d . . .
N2 N 0.94252(6) 0.42239(8) 0.70263(4) 0.0238(2) Uani 1 1 d . . .
N3 N 0.89391(6) 0.37558(7) 0.61261(4) 0.0201(2) Uani 1 1 d . . .
N4 N 0.68454(6) 0.46326(7) 0.70228(4) 0.0197(2) Uani 1 1 d . . .
N5 N 0.68086(5) 0.45589(7) 0.60852(4) 0.01814(19) Uani 1 1 d . . .
C1 C 0.75487(7) 0.45035(8) 0.71561(4) 0.0180(2) Uani 1 1 d . . .
C2 C 0.79578(7) 0.45277(9) 0.77112(5) 0.0191(2) Uani 1 1 d . . .
C3 C 0.87091(7) 0.44276(9) 0.77158(5) 0.0206(2) Uani 1 1 d . . .
C4 C 0.87937(7) 0.43067(9) 0.71616(5) 0.0198(2) Uani 1 1 d . . .
C5 C 0.76963(7) 0.46301(9) 0.81740(5) 0.0225(2) Uani 1 1 d . . .
H5 H 0.7180 0.4693 0.8166 0.027 Uiso 1 1 calc R . .
C6 C 0.82142(8) 0.46376(10) 0.86501(5) 0.0269(3) Uani 1 1 d . . .
H6 H 0.8052 0.4702 0.8975 0.032 Uiso 1 1 calc R . .
C7 C 0.89692(8) 0.45516(11) 0.86565(5) 0.0288(3) Uani 1 1 d . . .
H7 H 0.9314 0.4566 0.8987 0.035 Uiso 1 1 calc R . .
C8 C 0.92301(7) 0.44446(11) 0.81915(5) 0.0271(3) Uani 1 1 d . . .
H8 H 0.9746 0.4385 0.8198 0.033 Uiso 1 1 calc R . .
C9 C 0.94939(7) 0.41245(9) 0.64958(5) 0.0214(2) Uani 1 1 d . . .
C10 C 1.01773(7) 0.44067(10) 0.63849(5) 0.0244(3) Uani 1 1 d . . .
H10E H 1.0559 0.4634 0.6664 0.029 Uiso 1 1 calc R . .
C11 C 1.03037(7) 0.43584(10) 0.58725(5) 0.0237(3) Uani 1 1 d . . .
C12 C 0.97263(7) 0.39861(9) 0.54889(5) 0.0206(2) Uani 1 1 d . . .
C13 C 0.90817(7) 0.36825(8) 0.56373(5) 0.0189(2) Uani 1 1 d . . .
C14 C 0.96757(7) 0.38759(9) 0.49018(5) 0.0223(2) Uani 1 1 d . . .
H14A H 1.0006 0.3361 0.4826 0.027 Uiso 1 1 calc R . .
H14B H 0.9806 0.4477 0.4742 0.027 Uiso 1 1 calc R . .
C15 C 0.88520(7) 0.36182(9) 0.46932(5) 0.0231(3) Uani 1 1 d . . .
H15E H 0.8569 0.4189 0.4542 0.028 Uiso 1 1 calc R . .
H15F H 0.8805 0.3126 0.4413 0.028 Uiso 1 1 calc R . .
C16 C 0.85537(7) 0.32393(9) 0.51668(5) 0.0191(2) Uani 1 1 d . . .
H16I H 0.8030 0.3449 0.5150 0.023 Uiso 1 1 calc R . .
C17 C 1.10147(7) 0.46803(12) 0.57292(5) 0.0315(3) Uani 1 1 d . . .
H17F H 1.1273 0.4128 0.5620 0.047 Uiso 1 1 calc R . .
H17G H 1.1332 0.4984 0.6038 0.047 Uiso 1 1 calc R . .
H17H H 1.0903 0.5138 0.5436 0.047 Uiso 1 1 calc R . .
C18 C 0.82718(8) 0.17926(10) 0.55659(5) 0.0267(3) Uani 1 1 d . . .
H18J H 0.7777 0.2080 0.5549 0.032 Uiso 1 1 calc R . .
H18K H 0.8579 0.1912 0.5924 0.032 Uiso 1 1 calc R . .
C19 C 0.81945(7) 0.07364(9) 0.54662(5) 0.0214(2) Uani 1 1 d . . .
C20 C 0.87028(7) 0.01020(11) 0.57531(5) 0.0273(3) Uani 1 1 d . . .
H20 H 0.9113 0.0338 0.6007 0.033 Uiso 1 1 calc R . .
C21 C 0.86185(8) -0.08755(10) 0.56731(6) 0.0306(3) Uani 1 1 d . . .
H21 H 0.8972 -0.1302 0.5871 0.037 Uiso 1 1 calc R . .
C22 C 0.80220(8) -0.12263(10) 0.53068(6) 0.0285(3) Uani 1 1 d . . .
H22 H 0.7964 -0.1894 0.5252 0.034 Uiso 1 1 calc R . .
C23 C 0.75071(7) -0.05993(10) 0.50179(5) 0.0249(3) Uani 1 1 d . . .
H23 H 0.7094 -0.0839 0.4767 0.030 Uiso 1 1 calc R . .
C24 C 0.75954(7) 0.03743(10) 0.50956(5) 0.0221(2) Uani 1 1 d . . .
H24 H 0.7244 0.0800 0.4894 0.027 Uiso 1 1 calc R . .
C25 C 0.64583(7) 0.46613(8) 0.64930(5) 0.0184(2) Uani 1 1 d . . .
C26 C 0.56912(7) 0.48067(9) 0.64229(5) 0.0207(2) Uani 1 1 d . . .
H26 H 0.5474 0.4876 0.6724 0.025 Uiso 1 1 calc R . .
C27 C 0.52450(7) 0.48508(9) 0.59181(5) 0.0201(2) Uani 1 1 d . . .
C28 C 0.56070(6) 0.47884(8) 0.54970(5) 0.0185(2) Uani 1 1 d . . .
C29 C 0.63721(6) 0.46346(8) 0.56040(5) 0.0181(2) Uani 1 1 d . . .
C30 C 0.52947(7) 0.48230(9) 0.49090(5) 0.0210(2) Uani 1 1 d . . .
H30A H 0.4979 0.5393 0.4813 0.025 Uiso 1 1 calc R . .
H30B H 0.4998 0.4246 0.4789 0.025 Uiso 1 1 calc R . .
C31 C 0.59897(7) 0.48702(10) 0.46646(5) 0.0240(3) Uani 1 1 d . . .
H31A H 0.6089 0.5536 0.4572 0.029 Uiso 1 1 calc R . .
H31B H 0.5920 0.4476 0.4339 0.029 Uiso 1 1 calc R . .
C32 C 0.66368(7) 0.44821(9) 0.50914(5) 0.0194(2) Uani 1 1 d . . .
H32 H 0.6654 0.3778 0.5036 0.023 Uiso 1 1 calc R . .
C33 C 0.44141(7) 0.49440(10) 0.58356(6) 0.0259(3) Uani 1 1 d . . .
H33A H 0.4286 0.5249 0.6147 0.039 Uiso 1 1 calc R . .
H33B H 0.4187 0.4310 0.5786 0.039 Uiso 1 1 calc R . .
H33C H 0.4229 0.5334 0.5520 0.039 Uiso 1 1 calc R . .
C34 C 0.75102(7) 0.57933(9) 0.52537(5) 0.0240(3) Uani 1 1 d . . .
H34A H 0.7597 0.5807 0.5646 0.029 Uiso 1 1 calc R . .
H34B H 0.7090 0.6223 0.5109 0.029 Uiso 1 1 calc R . .
C35 C 0.81955(7) 0.61031(9) 0.50710(5) 0.0231(3) Uani 1 1 d . . .
C36 C 0.88829(8) 0.61516(10) 0.54138(6) 0.0303(3) Uani 1 1 d . . .
H36 H 0.8932 0.5992 0.5778 0.036 Uiso 1 1 calc R . .
C37 C 0.95046(9) 0.64377(11) 0.52202(8) 0.0428(4) Uani 1 1 d . . .
H37 H 0.9976 0.6478 0.5455 0.051 Uiso 1 1 calc R . .
C38 C 0.94364(10) 0.66628(11) 0.46894(8) 0.0447(4) Uani 1 1 d . . .
H38 H 0.9860 0.6855 0.4559 0.054 Uiso 1 1 calc R . .
C39 C 0.87551(10) 0.66081(12) 0.43514(7) 0.0434(4) Uani 1 1 d . . .
H39 H 0.8707 0.6763 0.3987 0.052 Uiso 1 1 calc R . .
C40 C 0.81396(9) 0.63286(11) 0.45386(6) 0.0333(3) Uani 1 1 d . . .
H40 H 0.7671 0.6290 0.4301 0.040 Uiso 1 1 calc R . .
O51 O 0.34816(5) -0.01671(6) 0.71596(3) 0.02016(17) Uani 1 1 d . . .
O52 O 0.55135(6) 0.30325(7) 0.79642(3) 0.0273(2) Uani 1 1 d . . .
N51 N 0.49711(6) 0.22883(8) 0.60236(4) 0.0204(2) Uani 1 1 d . . .
H51 H 0.4987(9) 0.2198(12) 0.6353(7) 0.024 Uiso 1 1 d . . .
N52 N 0.36569(6) 0.25178(7) 0.56874(4) 0.0203(2) Uani 1 1 d . . .
N53 N 0.38162(6) 0.16839(7) 0.65033(4) 0.0200(2) Uani 1 1 d . . .
N54 N 0.62919(6) 0.22031(8) 0.60583(4) 0.0219(2) Uani 1 1 d . . .
N55 N 0.59803(6) 0.21488(8) 0.69191(4) 0.0229(2) Uani 1 1 d . . .
C51 C 0.56067(7) 0.22635(9) 0.58161(5) 0.0201(2) Uani 1 1 d . . .
C52 C 0.53461(7) 0.23351(8) 0.52354(5) 0.0194(2) Uani 1 1 d . . .
C53 C 0.45760(7) 0.24441(9) 0.51290(5) 0.0195(2) Uani 1 1 d . . .
C54 C 0.43335(7) 0.24148(8) 0.56389(5) 0.0192(2) Uani 1 1 d . . .
C55 C 0.57308(7) 0.23005(9) 0.48258(5) 0.0217(2) Uani 1 1 d . . .
H55 H 0.6255 0.2222 0.4896 0.026 Uiso 1 1 calc R . .
C57 C 0.45516(8) 0.24973(9) 0.42033(5) 0.0249(3) Uani 1 1 d . . .
H57 H 0.4286 0.2554 0.3846 0.030 Uiso 1 1 calc R . .
C58 C 0.41653(7) 0.25285(9) 0.46135(5) 0.0222(2) Uani 1 1 d . . .
H58 H 0.3641 0.2604 0.4544 0.027 Uiso 1 1 calc R . .
C59 C 0.34733(7) 0.23804(9) 0.61853(5) 0.0202(2) Uani 1 1 d . . .
C60 C 0.28925(8) 0.29208(10) 0.63034(5) 0.0258(3) Uani 1 1 d . . .
H60 H 0.2671 0.3408 0.6066 0.031 Uiso 1 1 calc R . .
C61 C 0.26348(8) 0.27524(10) 0.67656(5) 0.0272(3) Uani 1 1 d . . .
C62 C 0.29812(8) 0.20214(9) 0.70897(5) 0.0249(3) Uani 1 1 d . . .
C63 C 0.35551(7) 0.15209(9) 0.69412(5) 0.0206(2) Uani 1 1 d . . .
C64 C 0.28383(9) 0.16536(10) 0.76075(5) 0.0305(3) Uani 1 1 d . . .
H64A H 0.2385 0.1255 0.7551 0.037 Uiso 1 1 calc R . .
H64B H 0.2788 0.2183 0.7851 0.037 Uiso 1 1 calc R . .
C65 C 0.35387(8) 0.10562(10) 0.78226(5) 0.0280(3) Uani 1 1 d . . .
H65A H 0.3918 0.1446 0.8060 0.034 Uiso 1 1 calc R . .
H65B H 0.3415 0.0500 0.8024 0.034 Uiso 1 1 calc R . .
C66 C 0.38272(7) 0.07286(9) 0.73349(5) 0.0219(2) Uani 1 1 d . . .
H66 H 0.4381 0.0678 0.7414 0.026 Uiso 1 1 calc R . .
C67 C 0.20068(10) 0.33179(13) 0.69026(7) 0.0423(4) Uani 1 1 d . . .
H67A H 0.1717 0.3613 0.6580 0.063 Uiso 1 1 calc R . .
H67B H 0.2208 0.3816 0.7159 0.063 Uiso 1 1 calc R . .
H67C H 0.1686 0.2894 0.7057 0.063 Uiso 1 1 calc R . .
C68 C 0.37361(9) -0.05157(10) 0.67073(6) 0.0321(3) Uani 1 1 d . . .
H68A H 0.4284 -0.0465 0.6772 0.039 Uiso 1 1 calc R . .
H68B H 0.3525 -0.0120 0.6394 0.039 Uiso 1 1 calc R . .
C69 C 0.35102(7) -0.15361(9) 0.65963(5) 0.0232(3) Uani 1 1 d . . .
C70 C 0.29543(7) -0.17580(10) 0.61586(5) 0.0262(3) Uani 1 1 d . . .
H70 H 0.2705 -0.1260 0.5942 0.031 Uiso 1 1 calc R . .
C71 C 0.27599(7) -0.27053(11) 0.60347(5) 0.0279(3) Uani 1 1 d . . .
H71 H 0.2378 -0.2851 0.5736 0.034 Uiso 1 1 calc R . .
C72 C 0.31253(8) -0.34294(10) 0.63474(5) 0.0282(3) Uani 1 1 d . . .
H72 H 0.2996 -0.4075 0.6263 0.034 Uiso 1 1 calc R . .
C73 C 0.36819(8) -0.32148(10) 0.67845(5) 0.0289(3) Uani 1 1 d . . .
H73 H 0.3933 -0.3713 0.7000 0.035 Uiso 1 1 calc R . .
C74 C 0.38721(8) -0.22729(11) 0.69069(5) 0.0264(3) Uani 1 1 d . . .
H74 H 0.4254 -0.2130 0.7206 0.032 Uiso 1 1 calc R . .
C75 C 0.64945(7) 0.21675(9) 0.66142(5) 0.0227(2) Uani 1 1 d . . .
C76 C 0.72579(8) 0.21437(9) 0.68334(6) 0.0261(3) Uani 1 1 d . . .
H76 H 0.7602 0.2168 0.6606 0.031 Uiso 1 1 calc R . .
C77 C 0.75179(8) 0.20856(9) 0.73791(6) 0.0285(3) Uani 1 1 d . . .
C78 C 0.69857(8) 0.20619(9) 0.76908(5) 0.0276(3) Uani 1 1 d . . .
C79 C 0.62399(8) 0.21056(9) 0.74418(5) 0.0244(3) Uani 1 1 d . . .
C80 C 0.70697(9) 0.19822(10) 0.82827(5) 0.0341(3) Uani 1 1 d . . .
H80A H 0.7239 0.2593 0.8460 0.041 Uiso 1 1 calc R . .
H80B H 0.7427 0.1474 0.8430 0.041 Uiso 1 1 calc R . .
C81 C 0.62792(9) 0.17308(10) 0.83475(5) 0.0325(3) Uani 1 1 d . . .
H81A H 0.6227 0.1033 0.8383 0.039 Uiso 1 1 calc R . .
H81B H 0.6170 0.2044 0.8667 0.039 Uiso 1 1 calc R . .
C82 C 0.57506(8) 0.20931(9) 0.78469(5) 0.0267(3) Uani 1 1 d . . .
H82 H 0.5318 0.1654 0.7736 0.032 Uiso 1 1 calc R . .
C83 C 0.83351(9) 0.20150(11) 0.76206(7) 0.0375(3) Uani 1 1 d . . .
H83A H 0.8622 0.2136 0.7347 0.056 Uiso 1 1 calc R . .
H83B H 0.8448 0.1375 0.7767 0.056 Uiso 1 1 calc R . .
H83C H 0.8467 0.2488 0.7905 0.056 Uiso 1 1 calc R . .
C84 C 0.49956(9) 0.34488(10) 0.75365(5) 0.0318(3) Uani 1 1 d . . .
H84A H 0.4587 0.2995 0.7403 0.038 Uiso 1 1 calc R . .
H84B H 0.5244 0.3604 0.7242 0.038 Uiso 1 1 calc R . .
C85 C 0.46909(8) 0.43412(10) 0.77341(5) 0.0264(3) Uani 1 1 d . . .
C86 C 0.39418(9) 0.44229(12) 0.77319(6) 0.0381(3) Uani 1 1 d . . .
H86 H 0.3617 0.3910 0.7602 0.046 Uiso 1 1 calc R . .
C87 C 0.36572(9) 0.52420(14) 0.79162(7) 0.0436(4) Uani 1 1 d . . .
H87 H 0.3140 0.5290 0.7908 0.052 Uiso 1 1 calc R . .
C88 C 0.41231(9) 0.59848(11) 0.81113(6) 0.0336(3) Uani 1 1 d . . .
H88 H 0.3929 0.6546 0.8238 0.040 Uiso 1 1 calc R . .
C89 C 0.48755(9) 0.59096(11) 0.81225(6) 0.0332(3) Uani 1 1 d . . .
H89 H 0.5201 0.6415 0.8263 0.040 Uiso 1 1 calc R . .
C90 C 0.51537(8) 0.50966(11) 0.79289(6) 0.0300(3) Uani 1 1 d . . .
H90 H 0.5669 0.5056 0.7930 0.036 Uiso 1 1 calc R . .
C56 C 0.53211(8) 0.23849(9) 0.43074(5) 0.0248(3) Uani 1 1 d . . .
H56 H 0.5571 0.2366 0.4020 0.030 Uiso 1 1 calc R . .
O101 O 0.64053(5) 0.68743(6) 0.93788(3) 0.02387(19) Uani 1 1 d . . .
O102 O 0.76988(5) 1.08576(6) 0.99436(4) 0.02483(19) Uani 1 1 d . . .
N101 N 0.68758(6) 0.93779(8) 0.81001(4) 0.0188(2) Uani 1 1 d . . .
H10 H 0.6892(9) 0.9273(12) 0.8427(7) 0.023 Uiso 1 1 d . . .
N102 N 0.55462(6) 0.91927(8) 0.77725(4) 0.0218(2) Uani 1 1 d . . .
N103 N 0.59382(6) 0.85945(8) 0.86552(4) 0.0205(2) Uani 1 1 d . . .
N104 N 0.81800(6) 0.96198(8) 0.80973(4) 0.0207(2) Uani 1 1 d . . .
N105 N 0.79707(6) 0.96886(8) 0.89874(4) 0.0207(2) Uani 1 1 d . . .
C101 C 0.74883(7) 0.95345(8) 0.78776(4) 0.0183(2) Uani 1 1 d . . .
C102 C 0.72000(7) 0.95968(8) 0.73005(5) 0.0194(2) Uani 1 1 d . . .
C103 C 0.64291(7) 0.95261(9) 0.72081(5) 0.0203(2) Uani 1 1 d . . .
C104 C 0.62175(7) 0.93511(9) 0.77210(5) 0.0200(2) Uani 1 1 d . . .
C105 C 0.75682(7) 0.97045(9) 0.68884(5) 0.0227(2) Uani 1 1 d . . .
H10A H 0.8094 0.9747 0.6953 0.027 Uiso 1 1 calc R . .
C106 C 0.71393(8) 0.97492(9) 0.63756(5) 0.0256(3) Uani 1 1 d . . .
H10B H 0.7377 0.9818 0.6084 0.031 Uiso 1 1 calc R . .
C107 C 0.63695(8) 0.96947(10) 0.62829(5) 0.0268(3) Uani 1 1 d . . .
H10C H 0.6090 0.9740 0.5930 0.032 Uiso 1 1 calc R . .
C108 C 0.60010(7) 0.95758(10) 0.66968(5) 0.0257(3) Uani 1 1 d . . .
H10D H 0.5475 0.9530 0.6632 0.031 Uiso 1 1 calc R . .
C109 C 0.53881(7) 0.88895(9) 0.82562(5) 0.0202(2) Uani 1 1 d . . .
C110 C 0.46353(7) 0.88460(9) 0.82858(5) 0.0218(2) Uani 1 1 d . . .
H11 H 0.4265 0.9052 0.7993 0.026 Uiso 1 1 calc R . .
C111 C 0.44278(7) 0.85042(9) 0.87405(5) 0.0227(2) Uani 1 1 d . . .
C112 C 0.49993(7) 0.82043(9) 0.91519(5) 0.0210(2) Uani 1 1 d . . .
C113 C 0.57254(7) 0.82553(9) 0.90812(5) 0.0194(2) Uani 1 1 d . . .
C114 C 0.49716(7) 0.77990(10) 0.96877(5) 0.0252(3) Uani 1 1 d . . .
H11A H 0.4769 0.7143 0.9656 0.030 Uiso 1 1 calc R . .
H11B H 0.4665 0.8202 0.9874 0.030 Uiso 1 1 calc R . .
C115 C 0.57961(7) 0.78071(10) 0.99797(5) 0.0249(3) Uani 1 1 d . . .
H11C H 0.5905 0.8380 1.0207 0.030 Uiso 1 1 calc R . .
H11D H 0.5913 0.7233 1.0205 0.030 Uiso 1 1 calc R . .
C116 C 0.62550(7) 0.78169(9) 0.95450(5) 0.0212(2) Uani 1 1 d . . .
H11E H 0.6719 0.8202 0.9652 0.025 Uiso 1 1 calc R . .
C117 C 0.36279(8) 0.84539(12) 0.87885(6) 0.0332(3) Uani 1 1 d . . .
H11F H 0.3307 0.8632 0.8449 0.050 Uiso 1 1 calc R . .
H11G H 0.3546 0.8894 0.9066 0.050 Uiso 1 1 calc R . .
H11H H 0.3511 0.7803 0.8882 0.050 Uiso 1 1 calc R . .
C118 C 0.70485(7) 0.64687(10) 0.97032(5) 0.0256(3) Uani 1 1 d . . .
H11I H 0.7068 0.6636 1.0079 0.031 Uiso 1 1 calc R . .
H11J H 0.7498 0.6728 0.9601 0.031 Uiso 1 1 calc R . .
C119 C 0.70311(7) 0.54022(9) 0.96399(5) 0.0214(2) Uani 1 1 d . . .
C120 C 0.65269(7) 0.49609(10) 0.92349(5) 0.0241(3) Uani 1 1 d . . .
H12 H 0.6180 0.5335 0.8994 0.029 Uiso 1 1 calc R . .
C121 C 0.65276(8) 0.39740(10) 0.91799(6) 0.0302(3) Uani 1 1 d . . .
H12A H 0.6182 0.3677 0.8902 0.036 Uiso 1 1 calc R . .
C122 C 0.70327(9) 0.34228(10) 0.95305(6) 0.0328(3) Uani 1 1 d . . .
H12B H 0.7033 0.2749 0.9493 0.039 Uiso 1 1 calc R . .
C123 C 0.75368(9) 0.38589(11) 0.99363(6) 0.0320(3) Uani 1 1 d . . .
H12C H 0.7883 0.3484 1.0177 0.038 Uiso 1 1 calc R . .
C124 C 0.75351(7) 0.48436(10) 0.99905(5) 0.0264(3) Uani 1 1 d . . .
H12D H 0.7881 0.5139 1.0269 0.032 Uiso 1 1 calc R . .
C125 C 0.84383(7) 0.96225(9) 0.86505(5) 0.0205(2) Uani 1 1 d . . .
C126 C 0.92121(7) 0.95978(9) 0.88250(5) 0.0243(3) Uani 1 1 d . . .
H12E H 0.9519 0.9565 0.8572 0.029 Uiso 1 1 calc R . .
C127 C 0.95380(7) 0.96209(9) 0.93623(5) 0.0258(3) Uani 1 1 d . . .
C128 C 0.90532(8) 0.96683(9) 0.97081(5) 0.0252(3) Uani 1 1 d . . .
C129 C 0.82945(7) 0.97166(9) 0.95035(5) 0.0220(2) Uani 1 1 d . . .
C130 C 0.92176(9) 0.96921(10) 1.03036(5) 0.0325(3) Uani 1 1 d . . .
H13A H 0.9439 1.0310 1.0439 0.039 Uiso 1 1 calc R . .
H13B H 0.9561 0.9172 1.0454 0.039 Uiso 1 1 calc R . .
C131 C 0.84515(9) 0.95545(11) 1.04390(5) 0.0351(3) Uani 1 1 d . . .
H13C H 0.8406 0.9953 1.0748 0.042 Uiso 1 1 calc R . .
H13D H 0.8378 0.8879 1.0526 0.042 Uiso 1 1 calc R . .
C132 C 0.78718(8) 0.98587(9) 0.99443(5) 0.0256(3) Uani 1 1 d . . .
H13 H 0.7415 0.9454 0.9892 0.031 Uiso 1 1 calc R . .
C133 C 1.03657(8) 0.96249(11) 0.95575(7) 0.0353(3) Uani 1 1 d . . .
H13E H 1.0523 1.0248 0.9714 0.053 Uiso 1 1 calc R . .
H13F H 1.0608 0.9503 0.9260 0.053 Uiso 1 1 calc R . .
H13G H 1.0506 0.9127 0.9827 0.053 Uiso 1 1 calc R . .
C134 C 0.72704(8) 1.11052(10) 1.03253(5) 0.0272(3) Uani 1 1 d . . .
H13H H 0.7265 1.1808 1.0360 0.033 Uiso 1 1 calc R . .
H13I H 0.7516 1.0840 1.0674 0.033 Uiso 1 1 calc R . .
C135 C 0.64772(8) 1.07501(9) 1.01894(5) 0.0247(3) Uani 1 1 d . . .
C136 C 0.60774(9) 1.07440(10) 0.96665(5) 0.0309(3) Uani 1 1 d . . .
H13J H 0.6316 1.0916 0.9387 0.037 Uiso 1 1 calc R . .
C137 C 0.53333(9) 1.04885(11) 0.95520(6) 0.0372(3) Uani 1 1 d . . .
H13K H 0.5063 1.0489 0.9195 0.045 Uiso 1 1 calc R . .
C138 C 0.49820(9) 1.02321(11) 0.99592(7) 0.0380(3) Uani 1 1 d . . .
H13L H 0.4470 1.0069 0.9881 0.046 Uiso 1 1 calc R . .
C139 C 0.53767(9) 1.02148(11) 1.04747(7) 0.0368(3) Uani 1 1 d . . .
H13M H 0.5139 1.0028 1.0752 0.044 Uiso 1 1 calc R . .
C140 C 0.61228(8) 1.04704(10) 1.05912(6) 0.0295(3) Uani 1 1 d . . .
H14 H 0.6393 1.0454 1.0948 0.035 Uiso 1 1 calc R . .
O151 O -0.09252(5) 0.80849(7) 0.70129(4) 0.02580(19) Uani 1 1 d . . .
O152 O 0.16645(5) 0.50926(7) 0.77255(4) 0.0302(2) Uani 1 1 d . . .
N151 N -0.01192(6) 0.71712(8) 0.89332(4) 0.0210(2) Uani 1 1 d . . .
H15 H -0.0183(9) 0.7144(12) 0.8599(7) 0.025 Uiso 1 1 d . . .
N152 N -0.14176(6) 0.71196(8) 0.89836(4) 0.0231(2) Uani 1 1 d . . .
N153 N -0.12341(6) 0.71241(8) 0.80873(4) 0.0226(2) Uani 1 1 d . . .
N154 N 0.12039(6) 0.73959(8) 0.92055(4) 0.0220(2) Uani 1 1 d . . .
N155 N 0.11961(6) 0.66819(8) 0.83783(4) 0.0241(2) Uani 1 1 d . . .
C151 C 0.05543(7) 0.72442(9) 0.92909(5) 0.0202(2) Uani 1 1 d . . .
C152 C 0.03768(7) 0.71940(9) 0.98217(5) 0.0217(2) Uani 1 1 d . . .
C153 C -0.03924(7) 0.71645(9) 0.97576(5) 0.0219(2) Uani 1 1 d . . .
C154 C -0.07183(7) 0.71471(9) 0.91832(5) 0.0207(2) Uani 1 1 d . . .
C155 C 0.08479(8) 0.71953(10) 1.03193(5) 0.0263(3) Uani 1 1 d . . .
H15A H 0.1372 0.7204 1.0358 0.032 Uiso 1 1 calc R . .
C156 C 0.05174(8) 0.71841(10) 1.07566(5) 0.0292(3) Uani 1 1 d . . .
H15B H 0.0821 0.7181 1.1103 0.035 Uiso 1 1 calc R . .
C157 C -0.02550(9) 0.71766(10) 1.06948(5) 0.0308(3) Uani 1 1 d . . .
H15C H -0.0466 0.7181 1.1001 0.037 Uiso 1 1 calc R . .
C158 C -0.07226(8) 0.71629(10) 1.01956(5) 0.0259(3) Uani 1 1 d . . .
H15D H -0.1247 0.7153 1.0155 0.031 Uiso 1 1 calc R . .
C159 C -0.16959(7) 0.71146(9) 0.84321(5) 0.0228(2) Uani 1 1 d . . .
C160 C -0.24705(7) 0.70898(9) 0.82643(5) 0.0245(3) Uani 1 1 d . . .
H16 H -0.2773 0.7092 0.8521 0.029 Uiso 1 1 calc R . .
C161 C -0.28012(7) 0.70613(9) 0.77279(6) 0.0263(3) Uani 1 1 d . . .
C162 C -0.23239(8) 0.70755(9) 0.73748(5) 0.0255(3) Uani 1 1 d . . .
C163 C -0.15642(7) 0.71115(9) 0.75716(5) 0.0236(3) Uani 1 1 d . . .
C164 C -0.24982(8) 0.70510(10) 0.67776(5) 0.0309(3) Uani 1 1 d . . .
H16A H -0.2692 0.7673 0.6628 0.037 Uiso 1 1 calc R . .
H16B H -0.2866 0.6547 0.6642 0.037 Uiso 1 1 calc R . .
C165 C -0.17359(9) 0.68271(10) 0.66429(5) 0.0313(3) Uani 1 1 d . . .
H16C H -0.1692 0.6137 0.6576 0.038 Uiso 1 1 calc R . .
H16D H -0.1677 0.7182 0.6322 0.038 Uiso 1 1 calc R . .
C166 C -0.11434(8) 0.71389(10) 0.71246(5) 0.0262(3) Uani 1 1 d . . .
H16E H -0.0711 0.6692 0.7192 0.031 Uiso 1 1 calc R . .
C167 C -0.36277(8) 0.69895(11) 0.75348(6) 0.0334(3) Uani 1 1 d . . .
H16F H -0.3874 0.7088 0.7833 0.050 Uiso 1 1 calc R . .
H16G H -0.3754 0.6356 0.7381 0.050 Uiso 1 1 calc R . .
H16H H -0.3794 0.7478 0.7264 0.050 Uiso 1 1 calc R . .
C168 C -0.03875(8) 0.84982(11) 0.74273(5) 0.0287(3) Uani 1 1 d . . .
H16J H 0.0022 0.8042 0.7552 0.034 Uiso 1 1 calc R . .
H16K H -0.0616 0.8664 0.7731 0.034 Uiso 1 1 calc R . .
C169 C -0.00955(7) 0.93803(11) 0.72101(5) 0.0281(3) Uani 1 1 d . . .
C170 C 0.02928(8) 0.93183(12) 0.68025(6) 0.0316(3) Uani 1 1 d . . .
H17 H 0.0372 0.8713 0.6659 0.038 Uiso 1 1 calc R . .
C171 C 0.05658(8) 1.01330(13) 0.66036(6) 0.0378(4) Uani 1 1 d . . .
H17A H 0.0837 1.0082 0.6329 0.045 Uiso 1 1 calc R . .
C172 C 0.04425(10) 1.10173(13) 0.68046(7) 0.0455(4) Uani 1 1 d . . .
H17B H 0.0630 1.1576 0.6670 0.055 Uiso 1 1 calc R . .
C173 C 0.00443(12) 1.10853(14) 0.72033(8) 0.0530(5) Uani 1 1 d . . .
H17C H -0.0046 1.1693 0.7341 0.064 Uiso 1 1 calc R . .
C174 C -0.02239(10) 1.02693(13) 0.74031(7) 0.0421(4) Uani 1 1 d . . .
H17D H -0.0499 1.0323 0.7675 0.051 Uiso 1 1 calc R . .
C175 C 0.13121(6) 0.74615(9) 0.86817(5) 0.0209(2) Uani 1 1 d . . .
C176 C 0.15798(7) 0.83196(9) 0.85171(5) 0.0228(2) Uani 1 1 d . . .
H17E H 0.1651 0.8851 0.8751 0.027 Uiso 1 1 calc R . .
C177 C 0.17426(7) 0.84032(10) 0.80173(5) 0.0232(3) Uani 1 1 d . . .
C178 C 0.16542(7) 0.75786(10) 0.77076(5) 0.0230(3) Uani 1 1 d . . .
C179 C 0.13839(7) 0.67639(10) 0.79030(5) 0.0239(3) Uani 1 1 d . . .
C180 C 0.18150(8) 0.74075(11) 0.71650(5) 0.0287(3) Uani 1 1 d . . .
H18A H 0.2325 0.7614 0.7151 0.034 Uiso 1 1 calc R . .
H18B H 0.1457 0.7752 0.6889 0.034 Uiso 1 1 calc R . .
C181 C 0.17300(13) 0.63318(13) 0.70913(7) 0.0524(5) Uani 1 1 d . . .
H18C H 0.2225 0.6027 0.7139 0.063 Uiso 1 1 calc R . .
H18D H 0.1447 0.6184 0.6730 0.063 Uiso 1 1 calc R . .
C182 C 0.13140(9) 0.59532(10) 0.75080(6) 0.0317(3) Uani 1 1 d . . .
H18 H 0.0780 0.5834 0.7343 0.038 Uiso 1 1 calc R . .
C183 C 0.20004(8) 0.93284(11) 0.78233(6) 0.0314(3) Uani 1 1 d . . .
H18E H 0.2175 0.9753 0.8126 0.047 Uiso 1 1 calc R . .
H18F H 0.1587 0.9631 0.7577 0.047 Uiso 1 1 calc R . .
H18G H 0.2407 0.9205 0.7641 0.047 Uiso 1 1 calc R . .
C184 C 0.11949(6) 0.45253(8) 0.79723(4) 0.0278(3) Uani 1 1 d . A .
H18H H 0.0759 0.4316 0.7703 0.033 Uiso 1 1 calc R . .
H18I H 0.1013 0.4912 0.8241 0.033 Uiso 1 1 calc R . .
C91 C 0.15982(6) 0.36706(8) 0.82344(4) 0.0340(3) Uani 1 1 d R . .
C92A C 0.24349(6) 0.38949(8) 0.84911(4) 0.0367(19) Uani 0.349(9) 1 d PRDU A 1
H92A H 0.2646 0.4506 0.8463 0.044 Uiso 0.349(9) 1 calc PR A 1
C93A C 0.2846(5) 0.3150(7) 0.8760(3) 0.049(2) Uani 0.349(9) 1 d PDU A 1
H93A H 0.3357 0.3248 0.8911 0.059 Uiso 0.349(9) 1 calc PR A 1
C94A C 0.2528(7) 0.2261(8) 0.8814(3) 0.049(2) Uani 0.349(9) 1 d PDU A 1
H94A H 0.2816 0.1765 0.9008 0.059 Uiso 0.349(9) 1 calc PR A 1
C95A C 0.1796(6) 0.2112(7) 0.8584(3) 0.043(2) Uani 0.349(9) 1 d PDU A 1
H95A H 0.1570 0.1513 0.8619 0.052 Uiso 0.349(9) 1 calc PR A 1
C96A C 0.1390(5) 0.2843(7) 0.8301(4) 0.0354(19) Uani 0.349(9) 1 d PDU A 1
H96A H 0.0891 0.2695 0.8136 0.043 Uiso 0.349(9) 1 calc PR A 1
C92B C 0.2257(2) 0.3664(3) 0.85521(13) 0.0405(12) Uani 0.651(9) 1 d PDU A 2
H92B H 0.2531 0.4242 0.8604 0.049 Uiso 0.651(9) 1 calc PR A 2
C93B C 0.2572(4) 0.2847(5) 0.88168(16) 0.0538(14) Uani 0.651(9) 1 d PDU A 2
H93B H 0.3048 0.2875 0.9047 0.065 Uiso 0.651(9) 1 calc PR A 2
C94B C 0.2181(4) 0.1989(4) 0.8740(2) 0.0554(17) Uani 0.651(9) 1 d PDU A 2
H94B H 0.2384 0.1430 0.8923 0.066 Uiso 0.651(9) 1 calc PR A 2
C95B C 0.1502(3) 0.1962(3) 0.8397(3) 0.0521(13) Uani 0.651(9) 1 d PDU A 2
H95B H 0.1245 0.1372 0.8332 0.063 Uiso 0.651(9) 1 calc PR A 2
C96B C 0.1188(3) 0.2773(4) 0.8147(2) 0.0343(10) Uani 0.651(9) 1 d PDU A 2
H96B H 0.0709 0.2751 0.7921 0.041 Uiso 0.651(9) 1 calc PR A 2

loop_
_atom_site_aniso_label
_atom_site_aniso_U_11
_atom_site_aniso_U_22
_atom_site_aniso_U_33
_atom_site_aniso_U_23
_atom_site_aniso_U_13
_atom_site_aniso_U_12
O1 0.0230(4) 0.0175(4) 0.0217(4) -0.0017(3) 0.0086(3) -0.0008(3)
O2 0.0221(4) 0.0180(4) 0.0236(4) -0.0016(3) 0.0089(3) -0.0012(3)
N1 0.0181(5) 0.0221(5) 0.0154(5) -0.0008(4) 0.0042(4) -0.0002(4)
N2 0.0207(5) 0.0304(6) 0.0206(5) -0.0042(4) 0.0050(4) -0.0003(4)
N3 0.0187(5) 0.0222(5) 0.0202(5) -0.0029(4) 0.0054(4) 0.0001(4)
N4 0.0208(5) 0.0199(5) 0.0189(5) 0.0011(4) 0.0058(4) 0.0006(4)
N5 0.0188(5) 0.0173(5) 0.0184(5) 0.0007(4) 0.0041(4) -0.0005(4)
C1 0.0219(6) 0.0164(5) 0.0167(5) 0.0007(4) 0.0067(4) -0.0014(4)
C2 0.0219(6) 0.0161(5) 0.0192(5) 0.0005(4) 0.0043(5) 0.0000(4)
C3 0.0216(6) 0.0205(6) 0.0200(6) -0.0009(5) 0.0047(5) -0.0009(5)
C4 0.0207(6) 0.0192(6) 0.0194(5) -0.0010(5) 0.0039(4) -0.0018(5)
C5 0.0223(6) 0.0255(6) 0.0208(6) 0.0008(5) 0.0069(5) 0.0027(5)
C6 0.0326(7) 0.0310(7) 0.0184(6) 0.0004(5) 0.0088(5) 0.0036(6)
C7 0.0276(6) 0.0381(8) 0.0187(6) -0.0011(5) 0.0003(5) 0.0029(6)
C8 0.0216(6) 0.0364(7) 0.0223(6) -0.0020(5) 0.0023(5) 0.0000(5)
C9 0.0190(6) 0.0242(6) 0.0215(6) -0.0024(5) 0.0053(5) 0.0015(5)
C10 0.0179(6) 0.0313(7) 0.0237(6) -0.0067(5) 0.0038(5) -0.0020(5)
C11 0.0199(6) 0.0268(6) 0.0257(6) -0.0044(5) 0.0076(5) -0.0001(5)
C12 0.0209(6) 0.0193(6) 0.0224(6) -0.0012(5) 0.0061(5) 0.0025(5)
C13 0.0199(6) 0.0158(5) 0.0210(6) -0.0017(4) 0.0040(4) 0.0025(4)
C14 0.0255(6) 0.0213(6) 0.0211(6) -0.0011(5) 0.0077(5) -0.0008(5)
C15 0.0281(6) 0.0215(6) 0.0192(6) -0.0009(5) 0.0039(5) -0.0014(5)
C16 0.0209(6) 0.0165(6) 0.0197(6) -0.0025(4) 0.0042(4) 0.0013(4)
C17 0.0232(6) 0.0450(8) 0.0286(6) -0.0073(6) 0.0103(5) -0.0074(6)
C18 0.0356(7) 0.0230(6) 0.0256(6) -0.0053(5) 0.0158(5) -0.0058(5)
C19 0.0242(6) 0.0224(6) 0.0199(6) -0.0011(5) 0.0100(5) -0.0021(5)
C20 0.0219(6) 0.0347(7) 0.0241(6) 0.0000(5) 0.0020(5) -0.0010(5)
C21 0.0304(7) 0.0297(7) 0.0332(7) 0.0077(6) 0.0104(6) 0.0090(6)
C22 0.0379(7) 0.0200(6) 0.0328(7) -0.0017(5) 0.0192(6) 0.0000(5)
C23 0.0259(6) 0.0291(7) 0.0209(6) -0.0048(5) 0.0077(5) -0.0048(5)
C24 0.0243(6) 0.0251(6) 0.0176(5) 0.0019(5) 0.0057(5) 0.0033(5)
C25 0.0204(6) 0.0162(5) 0.0189(5) 0.0007(4) 0.0051(4) -0.0008(4)
C26 0.0209(6) 0.0187(6) 0.0242(6) -0.0007(5) 0.0083(5) -0.0011(5)
C27 0.0192(6) 0.0146(5) 0.0265(6) -0.0008(5) 0.0047(5) -0.0003(4)
C28 0.0192(5) 0.0139(5) 0.0214(6) -0.0004(4) 0.0018(4) -0.0009(4)
C29 0.0200(6) 0.0138(5) 0.0209(6) 0.0008(4) 0.0049(4) -0.0012(4)
C30 0.0226(6) 0.0165(6) 0.0222(6) 0.0003(5) 0.0009(5) 0.0004(5)
C31 0.0263(6) 0.0252(6) 0.0193(6) 0.0026(5) 0.0020(5) -0.0007(5)
C32 0.0212(6) 0.0186(6) 0.0183(5) -0.0003(4) 0.0042(4) -0.0010(5)
C33 0.0180(6) 0.0248(6) 0.0348(7) -0.0004(5) 0.0052(5) 0.0007(5)
C34 0.0259(6) 0.0205(6) 0.0281(6) -0.0052(5) 0.0114(5) -0.0033(5)
C35 0.0266(6) 0.0153(6) 0.0302(7) -0.0015(5) 0.0121(5) 0.0000(5)
C36 0.0280(7) 0.0218(6) 0.0411(8) -0.0033(6) 0.0073(6) -0.0005(5)
C37 0.0273(7) 0.0272(8) 0.0746(12) -0.0076(8) 0.0123(7) -0.0042(6)
C38 0.0481(9) 0.0228(7) 0.0766(12) -0.0015(8) 0.0437(9) -0.0028(7)
C39 0.0594(11) 0.0334(8) 0.0475(9) 0.0076(7) 0.0345(8) 0.0052(7)
C40 0.0396(8) 0.0292(7) 0.0346(7) 0.0039(6) 0.0160(6) 0.0054(6)
O51 0.0244(4) 0.0205(4) 0.0175(4) 0.0002(3) 0.0089(3) -0.0020(3)
O52 0.0407(5) 0.0216(5) 0.0188(4) -0.0016(3) 0.0042(4) 0.0017(4)
N51 0.0250(5) 0.0221(5) 0.0154(5) 0.0001(4) 0.0072(4) -0.0006(4)
N52 0.0260(5) 0.0181(5) 0.0183(5) 0.0009(4) 0.0080(4) 0.0001(4)
N53 0.0238(5) 0.0194(5) 0.0182(5) 0.0008(4) 0.0070(4) -0.0011(4)
N54 0.0257(5) 0.0184(5) 0.0225(5) -0.0002(4) 0.0069(4) -0.0003(4)
N55 0.0301(5) 0.0183(5) 0.0203(5) -0.0013(4) 0.0054(4) -0.0006(4)
C51 0.0279(6) 0.0144(6) 0.0200(6) -0.0007(4) 0.0097(5) -0.0012(5)
C52 0.0265(6) 0.0127(5) 0.0205(6) -0.0006(4) 0.0083(5) -0.0015(5)
C53 0.0277(6) 0.0145(5) 0.0187(6) -0.0004(4) 0.0099(5) -0.0024(5)
C54 0.0272(6) 0.0138(5) 0.0172(5) 0.0004(4) 0.0066(5) -0.0009(4)
C55 0.0280(6) 0.0168(6) 0.0232(6) -0.0011(5) 0.0119(5) -0.0019(5)
C57 0.0377(7) 0.0204(6) 0.0173(6) -0.0002(5) 0.0075(5) -0.0032(5)
C58 0.0282(6) 0.0198(6) 0.0193(6) 0.0009(5) 0.0065(5) -0.0017(5)
C59 0.0247(6) 0.0195(6) 0.0175(5) -0.0007(4) 0.0071(4) -0.0020(5)
C60 0.0333(7) 0.0234(6) 0.0229(6) 0.0035(5) 0.0107(5) 0.0058(5)
C61 0.0342(7) 0.0263(7) 0.0249(6) -0.0019(5) 0.0144(5) 0.0047(6)
C62 0.0334(7) 0.0232(6) 0.0211(6) -0.0019(5) 0.0129(5) -0.0022(5)
C63 0.0239(6) 0.0201(6) 0.0186(5) -0.0015(5) 0.0065(4) -0.0029(5)
C64 0.0465(8) 0.0261(7) 0.0249(6) 0.0003(5) 0.0210(6) 0.0012(6)
C65 0.0438(8) 0.0247(6) 0.0175(6) -0.0002(5) 0.0109(5) -0.0053(6)
C66 0.0279(6) 0.0208(6) 0.0174(5) 0.0016(5) 0.0058(5) -0.0035(5)
C67 0.0560(10) 0.0405(9) 0.0384(8) 0.0071(7) 0.0283(8) 0.0206(8)
C68 0.0445(8) 0.0272(7) 0.0323(7) -0.0063(6) 0.0257(6) -0.0072(6)
C69 0.0274(6) 0.0243(6) 0.0222(6) -0.0019(5) 0.0147(5) -0.0008(5)
C70 0.0266(6) 0.0292(7) 0.0241(6) 0.0026(5) 0.0085(5) 0.0070(5)
C71 0.0230(6) 0.0359(7) 0.0257(6) -0.0075(6) 0.0069(5) 0.0000(5)
C72 0.0346(7) 0.0239(7) 0.0315(7) -0.0046(5) 0.0194(6) -0.0015(5)
C73 0.0406(8) 0.0278(7) 0.0218(6) 0.0053(5) 0.0146(6) 0.0101(6)
C74 0.0296(7) 0.0339(7) 0.0166(5) -0.0022(5) 0.0070(5) 0.0029(6)
C75 0.0286(6) 0.0153(6) 0.0243(6) 0.0003(5) 0.0059(5) 0.0001(5)
C76 0.0275(6) 0.0179(6) 0.0321(7) 0.0009(5) 0.0046(5) 0.0009(5)
C77 0.0315(7) 0.0153(6) 0.0352(7) 0.0013(5) -0.0012(6) 0.0012(5)
C78 0.0402(8) 0.0148(6) 0.0250(6) -0.0007(5) 0.0001(5) 0.0008(5)
C79 0.0355(7) 0.0148(6) 0.0222(6) -0.0007(5) 0.0047(5) -0.0016(5)
C80 0.0504(9) 0.0224(7) 0.0243(7) -0.0006(5) -0.0039(6) 0.0035(6)
C81 0.0578(9) 0.0194(6) 0.0193(6) 0.0006(5) 0.0056(6) 0.0032(6)
C82 0.0424(7) 0.0187(6) 0.0192(6) -0.0015(5) 0.0065(5) -0.0020(6)
C83 0.0338(8) 0.0283(7) 0.0439(8) 0.0059(6) -0.0070(6) -0.0004(6)
C84 0.0455(8) 0.0291(7) 0.0186(6) -0.0010(5) 0.0020(6) 0.0037(6)
C85 0.0357(7) 0.0261(7) 0.0167(5) 0.0017(5) 0.0040(5) -0.0021(6)
C86 0.0359(8) 0.0413(9) 0.0392(8) -0.0077(7) 0.0128(6) -0.0121(7)
C87 0.0313(8) 0.0566(11) 0.0461(9) -0.0068(8) 0.0157(7) -0.0016(7)
C88 0.0441(8) 0.0324(8) 0.0268(7) 0.0020(6) 0.0130(6) 0.0084(6)
C89 0.0403(8) 0.0281(7) 0.0299(7) -0.0020(6) 0.0046(6) -0.0023(6)
C90 0.0282(7) 0.0317(7) 0.0293(7) 0.0000(6) 0.0038(5) -0.0010(6)
C56 0.0378(7) 0.0193(6) 0.0217(6) -0.0014(5) 0.0167(5) -0.0019(5)
O101 0.0238(4) 0.0208(4) 0.0240(4) -0.0020(3) -0.0018(3) 0.0037(3)
O102 0.0320(5) 0.0223(5) 0.0225(4) -0.0016(3) 0.0109(4) -0.0018(4)
N101 0.0195(5) 0.0223(5) 0.0148(5) -0.0003(4) 0.0037(4) -0.0010(4)
N102 0.0209(5) 0.0245(5) 0.0201(5) 0.0008(4) 0.0045(4) 0.0008(4)
N103 0.0202(5) 0.0205(5) 0.0212(5) 0.0012(4) 0.0051(4) 0.0003(4)
N104 0.0233(5) 0.0204(5) 0.0190(5) -0.0017(4) 0.0060(4) -0.0002(4)
N105 0.0223(5) 0.0215(5) 0.0179(5) -0.0007(4) 0.0033(4) -0.0006(4)
C101 0.0232(6) 0.0158(5) 0.0170(5) -0.0007(4) 0.0067(4) 0.0006(4)
C102 0.0254(6) 0.0150(5) 0.0181(5) -0.0010(4) 0.0054(5) -0.0012(5)
C103 0.0242(6) 0.0178(6) 0.0194(6) -0.0007(5) 0.0056(5) -0.0009(5)
C104 0.0225(6) 0.0185(6) 0.0183(5) -0.0009(4) 0.0028(4) 0.0012(5)
C105 0.0277(6) 0.0209(6) 0.0210(6) -0.0012(5) 0.0083(5) -0.0028(5)
C106 0.0381(7) 0.0233(6) 0.0175(6) -0.0002(5) 0.0108(5) -0.0040(5)
C107 0.0357(7) 0.0267(7) 0.0169(6) 0.0007(5) 0.0029(5) -0.0024(6)
C108 0.0247(6) 0.0301(7) 0.0210(6) 0.0006(5) 0.0019(5) -0.0008(5)
C109 0.0208(6) 0.0191(6) 0.0209(6) -0.0010(5) 0.0045(4) -0.0003(5)
C110 0.0198(6) 0.0223(6) 0.0220(6) -0.0003(5) 0.0015(5) 0.0010(5)
C111 0.0215(6) 0.0204(6) 0.0271(6) -0.0006(5) 0.0070(5) -0.0002(5)
C112 0.0244(6) 0.0156(5) 0.0242(6) -0.0007(5) 0.0078(5) -0.0006(5)
C113 0.0215(6) 0.0158(5) 0.0204(6) -0.0009(4) 0.0035(5) -0.0003(4)
C114 0.0264(6) 0.0247(6) 0.0259(6) 0.0042(5) 0.0089(5) 0.0005(5)
C115 0.0306(7) 0.0241(6) 0.0203(6) 0.0022(5) 0.0059(5) 0.0021(5)
C116 0.0238(6) 0.0180(6) 0.0213(6) -0.0001(5) 0.0035(5) -0.0013(5)
C117 0.0220(6) 0.0419(8) 0.0373(8) 0.0070(6) 0.0095(6) 0.0012(6)
C118 0.0229(6) 0.0256(7) 0.0257(6) -0.0017(5) -0.0011(5) 0.0022(5)
C119 0.0204(6) 0.0252(6) 0.0195(6) 0.0001(5) 0.0066(5) 0.0021(5)
C120 0.0242(6) 0.0259(6) 0.0211(6) 0.0000(5) 0.0026(5) 0.0037(5)
C121 0.0324(7) 0.0277(7) 0.0278(7) -0.0024(5) 0.0001(5) 0.0006(6)
C122 0.0441(8) 0.0234(7) 0.0297(7) -0.0005(5) 0.0050(6) 0.0049(6)
C123 0.0388(8) 0.0310(7) 0.0239(6) 0.0054(6) 0.0011(6) 0.0114(6)
C124 0.0257(6) 0.0323(7) 0.0196(6) -0.0016(5) 0.0008(5) 0.0051(5)
C125 0.0222(6) 0.0178(6) 0.0214(6) -0.0016(5) 0.0041(5) -0.0006(5)
C126 0.0219(6) 0.0221(6) 0.0292(6) -0.0049(5) 0.0061(5) 0.0001(5)
C127 0.0236(6) 0.0165(6) 0.0335(7) -0.0042(5) -0.0024(5) 0.0024(5)
C128 0.0296(6) 0.0170(6) 0.0251(6) -0.0030(5) -0.0031(5) 0.0016(5)
C129 0.0280(6) 0.0173(6) 0.0201(6) -0.0009(5) 0.0032(5) -0.0010(5)
C130 0.0457(8) 0.0221(7) 0.0230(6) -0.0014(5) -0.0083(6) 0.0025(6)
C131 0.0538(9) 0.0302(7) 0.0197(6) 0.0015(5) 0.0045(6) 0.0055(7)
C132 0.0382(7) 0.0207(6) 0.0177(6) -0.0011(5) 0.0057(5) -0.0022(5)
C133 0.0257(7) 0.0274(7) 0.0472(8) -0.0097(6) -0.0051(6) 0.0023(6)
C134 0.0335(7) 0.0285(7) 0.0212(6) -0.0045(5) 0.0092(5) -0.0026(6)
C135 0.0324(7) 0.0196(6) 0.0229(6) -0.0008(5) 0.0077(5) 0.0021(5)
C136 0.0420(8) 0.0284(7) 0.0219(6) 0.0003(5) 0.0058(6) -0.0015(6)
C137 0.0402(8) 0.0298(8) 0.0360(8) -0.0076(6) -0.0047(6) 0.0030(6)
C138 0.0310(7) 0.0260(7) 0.0574(10) -0.0106(7) 0.0100(7) 0.0006(6)
C139 0.0391(8) 0.0305(8) 0.0472(9) -0.0029(7) 0.0236(7) 0.0011(6)
C140 0.0376(7) 0.0266(7) 0.0265(6) 0.0007(5) 0.0117(6) 0.0050(6)
O151 0.0295(5) 0.0246(5) 0.0220(4) 0.0009(4) 0.0025(4) -0.0042(4)
O152 0.0307(5) 0.0263(5) 0.0391(5) -0.0072(4) 0.0197(4) -0.0046(4)
N151 0.0239(5) 0.0230(5) 0.0168(5) 0.0000(4) 0.0058(4) 0.0001(4)
N152 0.0251(5) 0.0225(5) 0.0230(5) -0.0006(4) 0.0076(4) -0.0014(4)
N153 0.0254(5) 0.0208(5) 0.0213(5) 0.0007(4) 0.0048(4) 0.0004(4)
N154 0.0243(5) 0.0229(5) 0.0194(5) -0.0024(4) 0.0058(4) -0.0001(4)
N155 0.0266(5) 0.0256(6) 0.0221(5) -0.0036(4) 0.0097(4) -0.0031(4)
C151 0.0257(6) 0.0163(6) 0.0186(6) -0.0011(4) 0.0044(5) 0.0013(5)
C152 0.0289(6) 0.0171(6) 0.0204(6) -0.0005(5) 0.0083(5) 0.0009(5)
C153 0.0292(6) 0.0166(6) 0.0210(6) -0.0008(5) 0.0079(5) -0.0011(5)
C154 0.0257(6) 0.0168(6) 0.0211(6) 0.0000(5) 0.0084(5) 0.0005(5)
C155 0.0319(7) 0.0258(7) 0.0207(6) -0.0006(5) 0.0042(5) 0.0001(5)
C156 0.0398(8) 0.0298(7) 0.0176(6) -0.0016(5) 0.0049(5) -0.0013(6)
C157 0.0453(8) 0.0298(7) 0.0217(6) -0.0018(5) 0.0172(6) -0.0039(6)
C158 0.0322(7) 0.0230(6) 0.0257(6) -0.0025(5) 0.0134(5) -0.0036(5)
C159 0.0264(6) 0.0183(6) 0.0238(6) 0.0001(5) 0.0057(5) 0.0000(5)
C160 0.0245(6) 0.0203(6) 0.0294(6) -0.0009(5) 0.0075(5) 0.0000(5)
C161 0.0260(6) 0.0171(6) 0.0339(7) 0.0005(5) 0.0019(5) -0.0007(5)
C162 0.0312(7) 0.0167(6) 0.0259(6) 0.0004(5) 0.0001(5) -0.0017(5)
C163 0.0299(6) 0.0172(6) 0.0232(6) 0.0006(5) 0.0048(5) 0.0004(5)
C164 0.0397(8) 0.0225(6) 0.0264(7) -0.0001(5) -0.0022(6) -0.0057(6)
C165 0.0492(9) 0.0229(7) 0.0207(6) -0.0010(5) 0.0046(6) -0.0070(6)
C166 0.0364(7) 0.0214(6) 0.0212(6) -0.0005(5) 0.0069(5) -0.0001(5)
C167 0.0262(7) 0.0289(7) 0.0418(8) -0.0032(6) -0.0002(6) -0.0023(6)
C168 0.0261(6) 0.0347(7) 0.0239(6) -0.0001(6) 0.0023(5) -0.0036(6)
C169 0.0208(6) 0.0368(8) 0.0258(6) -0.0015(6) 0.0028(5) -0.0050(6)
C170 0.0248(6) 0.0420(8) 0.0274(7) -0.0002(6) 0.0040(5) 0.0003(6)
C171 0.0280(7) 0.0561(10) 0.0305(7) 0.0028(7) 0.0086(6) -0.0074(7)
C172 0.0489(10) 0.0457(10) 0.0445(9) -0.0016(8) 0.0156(8) -0.0223(8)
C173 0.0690(12) 0.0392(9) 0.0589(11) -0.0121(8) 0.0320(10) -0.0198(9)
C174 0.0474(9) 0.0412(9) 0.0436(9) -0.0085(7) 0.0229(7) -0.0110(7)
C175 0.0158(5) 0.0264(6) 0.0209(6) -0.0021(5) 0.0046(4) 0.0004(5)
C176 0.0212(6) 0.0230(6) 0.0235(6) -0.0022(5) 0.0034(5) -0.0016(5)
C177 0.0168(5) 0.0271(7) 0.0252(6) 0.0016(5) 0.0031(5) -0.0007(5)
C178 0.0179(6) 0.0298(7) 0.0221(6) 0.0014(5) 0.0061(5) 0.0015(5)
C179 0.0208(6) 0.0277(7) 0.0248(6) -0.0037(5) 0.0082(5) -0.0005(5)
C180 0.0302(7) 0.0344(7) 0.0246(6) 0.0001(5) 0.0127(5) 0.0012(6)
C181 0.0900(14) 0.0367(9) 0.0440(9) -0.0068(7) 0.0450(10) -0.0075(9)
C182 0.0424(8) 0.0295(7) 0.0269(7) -0.0060(6) 0.0159(6) -0.0035(6)
C183 0.0326(7) 0.0317(7) 0.0295(7) 0.0050(6) 0.0058(5) -0.0063(6)
C184 0.0269(6) 0.0329(7) 0.0255(6) -0.0061(5) 0.0096(5) -0.0076(6)
C91 0.0475(9) 0.0386(9) 0.0191(6) -0.0065(6) 0.0146(6) 0.0022(7)
C92A 0.032(3) 0.044(4) 0.029(3) -0.013(2) -0.005(2) -0.009(2)
C93A 0.047(4) 0.082(6) 0.019(3) -0.004(3) 0.005(3) 0.009(4)
C94A 0.064(6) 0.065(7) 0.023(3) 0.009(4) 0.020(4) 0.021(5)
C95A 0.060(6) 0.049(4) 0.025(4) 0.015(3) 0.020(4) 0.009(4)
C96A 0.033(4) 0.044(4) 0.033(4) -0.008(3) 0.014(3) -0.009(3)
C92B 0.0483(19) 0.0388(18) 0.0310(14) -0.0144(12) 0.0003(13) -0.0029(17)
C93B 0.066(3) 0.073(4) 0.0208(15) -0.003(2) 0.0061(18) 0.023(3)
C94B 0.090(5) 0.053(3) 0.033(3) 0.015(2) 0.037(3) 0.024(3)
C95B 0.071(3) 0.0389(19) 0.062(3) 0.0036(19) 0.050(3) 0.0039(19)
C96B 0.037(3) 0.0327(16) 0.040(3) -0.0045(17) 0.0236(18) -0.0078(15)

_geom_special_details
;
 All esds (except the esd in the dihedral angle between two l.s. planes)
 are estimated using the full covariance matrix.  The cell esds are taken
 into account individually in the estimation of esds in distances, angles
 and torsion angles; correlations between esds in cell parameters are only
 used when they are defined by crystal symmetry.  An approximate (isotropic)
 treatment of cell esds is used for estimating esds involving l.s. planes.
;

loop_
_geom_bond_atom_site_label_1
_geom_bond_atom_site_label_2
_geom_bond_distance
_geom_bond_site_symmetry_2
_geom_bond_publ_flag
O1 C18 1.4284(15) . ?
O1 C16 1.4434(14) . ?
O2 C32 1.4227(14) . ?
O2 C34 1.4285(15) . ?
N1 C4 1.3899(15) . ?
N1 C1 1.3931(15) . ?
N1 H1 0.843(16) . ?
N2 C4 1.2873(16) . ?
N2 C9 1.4060(16) . ?
N3 C13 1.3432(16) . ?
N3 C9 1.3460(16) . ?
N4 C1 1.2814(16) . ?
N4 C25 1.4023(15) . ?
N5 C29 1.3335(15) . ?
N5 C25 1.3508(15) . ?
C1 C2 1.4711(16) . ?
C2 C5 1.3837(17) . ?
C2 C3 1.3884(17) . ?
C3 C8 1.3899(17) . ?
C3 C4 1.4782(16) . ?
C5 C6 1.3876(18) . ?
C5 H5 0.9500 . ?
C6 C7 1.3923(19) . ?
C6 H6 0.9500 . ?
C7 C8 1.3891(19) . ?
C7 H7 0.9500 . ?
C8 H8 0.9500 . ?
C9 C10 1.4047(17) . ?
C10 C11 1.3895(18) . ?
C10 H10E 0.9500 . ?
C11 C12 1.3930(17) . ?
C11 C17 1.5024(18) . ?
C12 C13 1.3882(17) . ?
C12 C14 1.5041(17) . ?
C13 C16 1.5194(16) . ?
C14 C15 1.5425(17) . ?
C14 H14A 0.9900 . ?
C14 H14B 0.9900 . ?
C15 C16 1.5342(17) . ?
C15 H15E 0.9900 . ?
C15 H15F 0.9900 . ?
C16 H16I 1.0000 . ?
C17 H17F 0.9800 . ?
C17 H17G 0.9800 . ?
C17 H17H 0.9800 . ?
C18 C19 1.5053(18) . ?
C18 H18J 0.9900 . ?
C18 H18K 0.9900 . ?
C19 C20 1.3875(19) . ?
C19 C24 1.3951(18) . ?
C20 C21 1.390(2) . ?
C20 H20 0.9500 . ?
C21 C22 1.381(2) . ?
C21 H21 0.9500 . ?
C22 C23 1.390(2) . ?
C22 H22 0.9500 . ?
C23 C24 1.3848(19) . ?
C23 H23 0.9500 . ?
C24 H24 0.9500 . ?
C25 C26 1.4012(17) . ?
C26 C27 1.3871(17) . ?
C26 H26 0.9500 . ?
C27 C28 1.3900(17) . ?
C27 C33 1.5058(16) . ?
C28 C29 1.3948(16) . ?
C28 C30 1.5047(16) . ?
C29 C32 1.5155(16) . ?
C30 C31 1.5415(18) . ?
C30 H30A 0.9900 . ?
C30 H30B 0.9900 . ?
C31 C32 1.5420(16) . ?
C31 H31A 0.9900 . ?
C31 H31B 0.9900 . ?
C32 H32 1.0000 . ?
C33 H33A 0.9800 . ?
C33 H33B 0.9800 . ?
C33 H33C 0.9800 . ?
C34 C35 1.5005(17) . ?
C34 H34A 0.9900 . ?
C34 H34B 0.9900 . ?
C35 C36 1.3854(19) . ?
C35 C40 1.3907(19) . ?
C36 C37 1.400(2) . ?
C36 H36 0.9500 . ?
C37 C38 1.384(3) . ?
C37 H37 0.9500 . ?
C38 C39 1.372(3) . ?
C38 H38 0.9500 . ?
C39 C40 1.378(2) . ?
C39 H39 0.9500 . ?
C40 H40 0.9500 . ?
O51 C68 1.4302(15) . ?
O51 C66 1.4379(15) . ?
O52 C84 1.4232(16) . ?
O52 C82 1.4400(16) . ?
N51 C54 1.3807(16) . ?
N51 C51 1.3852(16) . ?
N51 H51 0.853(17) . ?
N52 C54 1.2861(16) . ?
N52 C59 1.4067(15) . ?
N53 C63 1.3355(15) . ?
N53 C59 1.3448(16) . ?
N54 C51 1.2883(17) . ?
N54 C75 1.4034(16) . ?
N55 C79 1.3330(16) . ?
N55 C75 1.3514(17) . ?
C51 C52 1.4761(16) . ?
C52 C55 1.3896(17) . ?
C52 C53 1.3954(18) . ?
C53 C58 1.3893(17) . ?
C53 C54 1.4741(16) . ?
C55 C56 1.3950(18) . ?
C55 H55 0.9500 . ?
C57 C58 1.3929(18) . ?
C57 C56 1.395(2) . ?
C57 H57 0.9500 . ?
C58 H58 0.9500 . ?
C59 C60 1.3955(18) . ?
C60 C61 1.3914(18) . ?
C60 H60 0.9500 . ?
C61 C62 1.390(2) . ?
C61 C67 1.5040(19) . ?
C62 C63 1.3876(18) . ?
C62 C64 1.5041(17) . ?
C63 C66 1.5174(17) . ?
C64 C65 1.541(2) . ?
C64 H64A 0.9900 . ?
C64 H64B 0.9900 . ?
C65 C66 1.5335(17) . ?
C65 H65A 0.9900 . ?
C65 H65B 0.9900 . ?
C66 H66 1.0000 . ?
C67 H67A 0.9800 . ?
C67 H67B 0.9800 . ?
C67 H67C 0.9800 . ?
C68 C69 1.5013(19) . ?
C68 H68A 0.9900 . ?
C68 H68B 0.9900 . ?
C69 C74 1.3892(19) . ?
C69 C70 1.3906(19) . ?
C70 C71 1.396(2) . ?
C70 H70 0.9500 . ?
C71 C72 1.381(2) . ?
C71 H71 0.9500 . ?
C72 C73 1.388(2) . ?
C72 H72 0.9500 . ?
C73 C74 1.386(2) . ?
C73 H73 0.9500 . ?
C74 H74 0.9500 . ?
C75 C76 1.4016(19) . ?
C76 C77 1.3896(19) . ?
C76 H76 0.9500 . ?
C77 C78 1.391(2) . ?
C77 C83 1.507(2) . ?
C78 C79 1.3904(19) . ?
C78 C80 1.5048(19) . ?
C79 C82 1.5149(19) . ?
C80 C81 1.541(2) . ?
C80 H80A 0.9900 . ?
C80 H80B 0.9900 . ?
C81 C82 1.5312(18) . ?
C81 H81A 0.9900 . ?
C81 H81B 0.9900 . ?
C82 H82 1.0000 . ?
C83 H83A 0.9800 . ?
C83 H83B 0.9800 . ?
C83 H83C 0.9800 . ?
C84 C85 1.504(2) . ?
C84 H84A 0.9900 . ?
C84 H84B 0.9900 . ?
C85 C86 1.383(2) . ?
C85 C90 1.386(2) . ?
C86 C87 1.387(2) . ?
C86 H86 0.9500 . ?
C87 C88 1.376(2) . ?
C87 H87 0.9500 . ?
C88 C89 1.384(2) . ?
C88 H88 0.9500 . ?
C89 C90 1.385(2) . ?
C89 H89 0.9500 . ?
C90 H90 0.9500 . ?
C56 H56 0.9500 . ?
O101 C118 1.4182(15) . ?
O101 C116 1.4346(15) . ?
O102 C134 1.4268(15) . ?
O102 C132 1.4368(16) . ?
N101 C101 1.3856(16) . ?
N101 C104 1.3891(15) . ?
N101 H10 0.851(16) . ?
N102 C104 1.2899(17) . ?
N102 C109 1.4038(16) . ?
N103 C113 1.3285(16) . ?
N103 C109 1.3486(16) . ?
N104 C101 1.2866(16) . ?
N104 C125 1.4052(15) . ?
N105 C129 1.3393(16) . ?
N105 C125 1.3479(16) . ?
C101 C102 1.4733(16) . ?
C102 C105 1.3825(17) . ?
C102 C103 1.3932(17) . ?
C103 C108 1.3883(17) . ?
C103 C104 1.4746(16) . ?
C105 C106 1.3919(18) . ?
C105 H10A 0.9500 . ?
C106 C107 1.390(2) . ?
C106 H10B 0.9500 . ?
C107 C108 1.3886(18) . ?
C107 H10C 0.9500 . ?
C108 H10D 0.9500 . ?
C109 C110 1.4056(17) . ?
C110 C111 1.3916(18) . ?
C110 H11 0.9500 . ?
C111 C112 1.3935(18) . ?
C111 C117 1.5055(18) . ?
C112 C113 1.3886(17) . ?
C112 C114 1.5038(17) . ?
C113 C116 1.5067(16) . ?
C114 C115 1.5472(18) . ?
C114 H11A 0.9900 . ?
C114 H11B 0.9900 . ?
C115 C116 1.5377(17) . ?
C115 H11C 0.9900 . ?
C115 H11D 0.9900 . ?
C116 H11E 1.0000 . ?
C117 H11F 0.9800 . ?
C117 H11G 0.9800 . ?
C117 H11H 0.9800 . ?
C118 C119 1.5044(19) . ?
C118 H11I 0.9900 . ?
C118 H11J 0.9900 . ?
C119 C120 1.3889(18) . ?
C119 C124 1.3931(18) . ?
C120 C121 1.392(2) . ?
C120 H12 0.9500 . ?
C121 C122 1.388(2) . ?
C121 H12A 0.9500 . ?
C122 C123 1.387(2) . ?
C122 H12B 0.9500 . ?
C123 C124 1.388(2) . ?
C123 H12C 0.9500 . ?
C124 H12D 0.9500 . ?
C125 C126 1.4022(17) . ?
C126 C127 1.3894(18) . ?
C126 H12E 0.9500 . ?
C127 C128 1.388(2) . ?
C127 C133 1.5019(18) . ?
C128 C129 1.3881(18) . ?
C128 C130 1.5010(18) . ?
C129 C132 1.5184(18) . ?
C130 C131 1.535(2) . ?
C130 H13A 0.9900 . ?
C130 H13B 0.9900 . ?
C131 C132 1.5418(18) . ?
C131 H13C 0.9900 . ?
C131 H13D 0.9900 . ?
C132 H13 1.0000 . ?
C133 H13E 0.9800 . ?
C133 H13F 0.9800 . ?
C133 H13G 0.9800 . ?
C134 C135 1.5134(19) . ?
C134 H13H 0.9900 . ?
C134 H13I 0.9900 . ?
C135 C140 1.3908(19) . ?
C135 C136 1.3939(19) . ?
C136 C137 1.387(2) . ?
C136 H13J 0.9500 . ?
C137 C138 1.390(2) . ?
C137 H13K 0.9500 . ?
C138 C139 1.375(2) . ?
C138 H13L 0.9500 . ?
C139 C140 1.391(2) . ?
C139 H13M 0.9500 . ?
C140 H14 0.9500 . ?
O151 C168 1.4193(16) . ?
O151 C166 1.4330(16) . ?
O152 C184 1.4198(14) . ?
O152 C182 1.4271(19) . ?
N151 C151 1.3857(16) . ?
N151 C154 1.3895(16) . ?
N151 H15 0.844(17) . ?
N152 C154 1.2835(17) . ?
N152 C159 1.4061(16) . ?
N153 C163 1.3407(16) . ?
N153 C159 1.3525(17) . ?
N154 C151 1.2785(17) . ?
N154 C175 1.4079(16) . ?
N155 C175 1.3353(17) . ?
N155 C179 1.3455(16) . ?
C151 C152 1.4732(16) . ?
C152 C155 1.3897(18) . ?
C152 C153 1.3920(18) . ?
C153 C158 1.3895(17) . ?
C153 C154 1.4764(17) . ?
C155 C156 1.3884(19) . ?
C155 H15A 0.9500 . ?
C156 C157 1.398(2) . ?
C156 H15B 0.9500 . ?
C157 C158 1.390(2) . ?
C157 H15C 0.9500 . ?
C158 H15D 0.9500 . ?
C159 C160 1.4018(18) . ?
C160 C161 1.3896(19) . ?
C160 H16 0.9500 . ?
C161 C162 1.391(2) . ?
C161 C167 1.5025(18) . ?
C162 C163 1.3857(19) . ?
C162 C164 1.5051(18) . ?
C163 C166 1.5174(18) . ?
C164 C165 1.547(2) . ?
C164 H16A 0.9900 . ?
C164 H16B 0.9900 . ?
C165 C166 1.5348(18) . ?
C165 H16C 0.9900 . ?
C165 H16D 0.9900 . ?
C166 H16E 1.0000 . ?
C167 H16F 0.9800 . ?
C167 H16G 0.9800 . ?
C167 H16H 0.9800 . ?
C168 C169 1.503(2) . ?
C168 H16J 0.9900 . ?
C168 H16K 0.9900 . ?
C169 C174 1.381(2) . ?
C169 C170 1.391(2) . ?
C170 C171 1.389(2) . ?
C170 H17 0.9500 . ?
C171 C172 1.381(3) . ?
C171 H17A 0.9500 . ?
C172 C173 1.385(3) . ?
C172 H17B 0.9500 . ?
C173 C174 1.388(2) . ?
C173 H17C 0.9500 . ?
C174 H17D 0.9500 . ?
C175 C176 1.3997(18) . ?
C176 C177 1.3870(18) . ?
C176 H17E 0.9500 . ?
C177 C178 1.3954(19) . ?
C177 C183 1.5029(19) . ?
C178 C179 1.3827(19) . ?
C178 C180 1.5079(17) . ?
C179 C182 1.5136(18) . ?
C180 C181 1.525(2) . ?
C180 H18A 0.9900 . ?
C180 H18B 0.9900 . ?
C181 C182 1.538(2) . ?
C181 H18C 0.9900 . ?
C181 H18D 0.9900 . ?
C182 H18 1.0000 . ?
C183 H18E 0.9800 . ?
C183 H18F 0.9800 . ?
C183 H18G 0.9800 . ?
C184 C91 1.4950 . ?
C184 H18H 0.9900 . ?
C184 H18I 0.9900 . ?
C91 C96A 1.246(10) . ?
C91 C92B 1.313(4) . ?
C91 C96B 1.461(5) . ?
C91 C92A 1.5762 . ?
C92A C93A 1.387(9) . ?
C92A H92A 0.9500 . ?
C93A C94A 1.398(11) . ?
C93A H93A 0.9500 . ?
C94A C95A 1.370(11) . ?
C94A H94A 0.9500 . ?
C95A C96A 1.385(11) . ?
C95A H95A 0.9500 . ?
C96A H96A 0.9500 . ?
C92B C93B 1.397(6) . ?
C92B H92B 0.9500 . ?
C93B C94B 1.395(7) . ?
C93B H93B 0.9500 . ?
C94B C95B 1.373(7) . ?
C94B H94B 0.9500 . ?
C95B C96B 1.375(7) . ?
C95B H95B 0.9500 . ?
C96B H96B 0.9500 . ?

loop_
_geom_angle_atom_site_label_1
_geom_angle_atom_site_label_2
_geom_angle_atom_site_label_3
_geom_angle
_geom_angle_site_symmetry_1
_geom_angle_site_symmetry_3
_geom_angle_publ_flag
C18 O1 C16 112.01(9) . . ?
C32 O2 C34 116.27(9) . . ?
C4 N1 C1 111.94(10) . . ?
C4 N1 H1 123.9(11) . . ?
C1 N1 H1 124.1(11) . . ?
C4 N2 C9 122.84(11) . . ?
C13 N3 C9 115.13(10) . . ?
C1 N4 C25 122.99(10) . . ?
C29 N5 C25 114.95(10) . . ?
N4 C1 N1 131.33(11) . . ?
N4 C1 C2 122.73(11) . . ?
N1 C1 C2 105.92(10) . . ?
C5 C2 C3 121.95(11) . . ?
C5 C2 C1 129.84(11) . . ?
C3 C2 C1 108.21(10) . . ?
C2 C3 C8 120.56(11) . . ?
C2 C3 C4 108.04(10) . . ?
C8 C3 C4 131.39(12) . . ?
N2 C4 N1 130.39(11) . . ?
N2 C4 C3 123.75(11) . . ?
N1 C4 C3 105.81(10) . . ?
C2 C5 C6 117.64(11) . . ?
C2 C5 H5 121.2 . . ?
C6 C5 H5 121.2 . . ?
C5 C6 C7 120.65(12) . . ?
C5 C6 H6 119.7 . . ?
C7 C6 H6 119.7 . . ?
C8 C7 C6 121.59(12) . . ?
C8 C7 H7 119.2 . . ?
C6 C7 H7 119.2 . . ?
C7 C8 C3 117.59(12) . . ?
C7 C8 H8 121.2 . . ?
C3 C8 H8 121.2 . . ?
N3 C9 C10 122.96(11) . . ?
N3 C9 N2 121.13(11) . . ?
C10 C9 N2 115.88(11) . . ?
C11 C10 C9 120.99(11) . . ?
C11 C10 H10E 119.5 . . ?
C9 C10 H10E 119.5 . . ?
C10 C11 C12 115.97(11) . . ?
C10 C11 C17 123.14(11) . . ?
C12 C11 C17 120.89(11) . . ?
C13 C12 C11 119.29(11) . . ?
C13 C12 C14 111.65(11) . . ?
C11 C12 C14 129.03(12) . . ?
N3 C13 C12 125.53(11) . . ?
N3 C13 C16 124.16(11) . . ?
C12 C13 C16 110.30(10) . . ?
C12 C14 C15 102.94(10) . . ?
C12 C14 H14A 111.2 . . ?
C15 C14 H14A 111.2 . . ?
C12 C14 H14B 111.2 . . ?
C15 C14 H14B 111.2 . . ?
H14A C14 H14B 109.1 . . ?
C16 C15 C14 107.08(10) . . ?
C16 C15 H15E 110.3 . . ?
C14 C15 H15E 110.3 . . ?
C16 C15 H15F 110.3 . . ?
C14 C15 H15F 110.3 . . ?
H15E C15 H15F 108.6 . . ?
O1 C16 C13 111.43(10) . . ?
O1 C16 C15 108.30(10) . . ?
C13 C16 C15 102.54(10) . . ?
O1 C16 H16I 111.4 . . ?
C13 C16 H16I 111.4 . . ?
C15 C16 H16I 111.4 . . ?
C11 C17 H17F 109.5 . . ?
C11 C17 H17G 109.5 . . ?
H17F C17 H17G 109.5 . . ?
C11 C17 H17H 109.5 . . ?
H17F C17 H17H 109.5 . . ?
H17G C17 H17H 109.5 . . ?
O1 C18 C19 108.98(10) . . ?
O1 C18 H18J 109.9 . . ?
C19 C18 H18J 109.9 . . ?
O1 C18 H18K 109.9 . . ?
C19 C18 H18K 109.9 . . ?
H18J C18 H18K 108.3 . . ?
C20 C19 C24 118.68(12) . . ?
C20 C19 C18 120.74(12) . . ?
C24 C19 C18 120.54(12) . . ?
C19 C20 C21 120.77(13) . . ?
C19 C20 H20 119.6 . . ?
C21 C20 H20 119.6 . . ?
C22 C21 C20 120.06(13) . . ?
C22 C21 H21 120.0 . . ?
C20 C21 H21 120.0 . . ?
C21 C22 C23 119.78(13) . . ?
C21 C22 H22 120.1 . . ?
C23 C22 H22 120.1 . . ?
C24 C23 C22 120.02(12) . . ?
C24 C23 H23 120.0 . . ?
C22 C23 H23 120.0 . . ?
C23 C24 C19 120.68(12) . . ?
C23 C24 H24 119.7 . . ?
C19 C24 H24 119.7 . . ?
N5 C25 C26 123.23(11) . . ?
N5 C25 N4 121.74(10) . . ?
C26 C25 N4 115.04(10) . . ?
C27 C26 C25 120.72(11) . . ?
C27 C26 H26 119.6 . . ?
C25 C26 H26 119.6 . . ?
C26 C27 C28 116.26(11) . . ?
C26 C27 C33 121.42(11) . . ?
C28 C27 C33 122.31(11) . . ?
C27 C28 C29 119.02(11) . . ?
C27 C28 C30 129.74(11) . . ?
C29 C28 C30 111.19(10) . . ?
N5 C29 C28 125.71(11) . . ?
N5 C29 C32 123.91(10) . . ?
C28 C29 C32 110.20(10) . . ?
C28 C30 C31 103.75(10) . . ?
C28 C30 H30A 111.0 . . ?
C31 C30 H30A 111.0 . . ?
C28 C30 H30B 111.0 . . ?
C31 C30 H30B 111.0 . . ?
H30A C30 H30B 109.0 . . ?
C30 C31 C32 106.09(10) . . ?
C30 C31 H31A 110.5 . . ?
C32 C31 H31A 110.5 . . ?
C30 C31 H31B 110.5 . . ?
C32 C31 H31B 110.5 . . ?
H31A C31 H31B 108.7 . . ?
O2 C32 C29 117.57(9) . . ?
O2 C32 C31 114.84(10) . . ?
C29 C32 C31 103.32(9) . . ?
O2 C32 H32 106.8 . . ?
C29 C32 H32 106.8 . . ?
C31 C32 H32 106.8 . . ?
C27 C33 H33A 109.5 . . ?
C27 C33 H33B 109.5 . . ?
H33A C33 H33B 109.5 . . ?
C27 C33 H33C 109.5 . . ?
H33A C33 H33C 109.5 . . ?
H33B C33 H33C 109.5 . . ?
O2 C34 C35 106.85(10) . . ?
O2 C34 H34A 110.4 . . ?
C35 C34 H34A 110.4 . . ?
O2 C34 H34B 110.4 . . ?
C35 C34 H34B 110.4 . . ?
H34A C34 H34B 108.6 . . ?
C36 C35 C40 119.14(13) . . ?
C36 C35 C34 122.04(12) . . ?
C40 C35 C34 118.80(12) . . ?
C35 C36 C37 119.56(15) . . ?
C35 C36 H36 120.2 . . ?
C37 C36 H36 120.2 . . ?
C38 C37 C36 120.39(16) . . ?
C38 C37 H37 119.8 . . ?
C36 C37 H37 119.8 . . ?
C39 C38 C37 119.78(14) . . ?
C39 C38 H38 120.1 . . ?
C37 C38 H38 120.1 . . ?
C38 C39 C40 120.24(16) . . ?
C38 C39 H39 119.9 . . ?
C40 C39 H39 119.9 . . ?
C39 C40 C35 120.88(15) . . ?
C39 C40 H40 119.6 . . ?
C35 C40 H40 119.6 . . ?
C68 O51 C66 110.84(9) . . ?
C84 O52 C82 113.35(10) . . ?
C54 N51 C51 112.74(10) . . ?
C54 N51 H51 125.6(11) . . ?
C51 N51 H51 121.6(11) . . ?
C54 N52 C59 119.73(10) . . ?
C63 N53 C59 115.67(11) . . ?
C51 N54 C75 121.42(11) . . ?
C79 N55 C75 116.20(12) . . ?
N54 C51 N51 129.47(11) . . ?
N54 C51 C52 124.99(11) . . ?
N51 C51 C52 105.54(10) . . ?
C55 C52 C53 120.88(11) . . ?
C55 C52 C51 131.17(12) . . ?
C53 C52 C51 107.95(10) . . ?
C58 C53 C52 121.66(11) . . ?
C58 C53 C54 130.44(12) . . ?
C52 C53 C54 107.87(10) . . ?
N52 C54 N51 129.82(11) . . ?
N52 C54 C53 124.33(11) . . ?
N51 C54 C53 105.83(10) . . ?
C52 C55 C56 117.70(12) . . ?
C52 C55 H55 121.1 . . ?
C56 C55 H55 121.1 . . ?
C58 C57 C56 121.14(12) . . ?
C58 C57 H57 119.4 . . ?
C56 C57 H57 119.4 . . ?
C53 C58 C57 117.42(12) . . ?
C53 C58 H58 121.3 . . ?
C57 C58 H58 121.3 . . ?
N53 C59 C60 123.04(11) . . ?
N53 C59 N52 118.92(11) . . ?
C60 C59 N52 117.77(11) . . ?
C61 C60 C59 120.58(12) . . ?
C61 C60 H60 119.7 . . ?
C59 C60 H60 119.7 . . ?
C62 C61 C60 116.33(12) . . ?
C62 C61 C67 121.79(12) . . ?
C60 C61 C67 121.88(13) . . ?
C63 C62 C61 119.19(11) . . ?
C63 C62 C64 110.84(12) . . ?
C61 C62 C64 129.96(12) . . ?
N53 C63 C62 125.17(12) . . ?
N53 C63 C66 124.28(11) . . ?
C62 C63 C66 110.50(11) . . ?
C62 C64 C65 102.53(11) . . ?
C62 C64 H64A 111.3 . . ?
C65 C64 H64A 111.3 . . ?
C62 C64 H64B 111.3 . . ?
C65 C64 H64B 111.3 . . ?
H64A C64 H64B 109.2 . . ?
C66 C65 C64 106.00(10) . . ?
C66 C65 H65A 110.5 . . ?
C64 C65 H65A 110.5 . . ?
C66 C65 H65B 110.5 . . ?
C64 C65 H65B 110.5 . . ?
H65A C65 H65B 108.7 . . ?
O51 C66 C63 111.55(10) . . ?
O51 C66 C65 108.23(10) . . ?
C63 C66 C65 101.88(10) . . ?
O51 C66 H66 111.6 . . ?
C63 C66 H66 111.6 . . ?
C65 C66 H66 111.6 . . ?
C61 C67 H67A 109.5 . . ?
C61 C67 H67B 109.5 . . ?
H67A C67 H67B 109.5 . . ?
C61 C67 H67C 109.5 . . ?
H67A C67 H67C 109.5 . . ?
H67B C67 H67C 109.5 . . ?
O51 C68 C69 110.87(11) . . ?
O51 C68 H68A 109.5 . . ?
C69 C68 H68A 109.5 . . ?
O51 C68 H68B 109.5 . . ?
C69 C68 H68B 109.5 . . ?
H68A C68 H68B 108.1 . . ?
C74 C69 C70 118.94(13) . . ?
C74 C69 C68 121.27(13) . . ?
C70 C69 C68 119.71(13) . . ?
C69 C70 C71 120.57(13) . . ?
C69 C70 H70 119.7 . . ?
C71 C70 H70 119.7 . . ?
C72 C71 C70 119.77(13) . . ?
C72 C71 H71 120.1 . . ?
C70 C71 H71 120.1 . . ?
C71 C72 C73 120.05(13) . . ?
C71 C72 H72 120.0 . . ?
C73 C72 H72 120.0 . . ?
C74 C73 C72 119.99(13) . . ?
C74 C73 H73 120.0 . . ?
C72 C73 H73 120.0 . . ?
C73 C74 C69 120.67(12) . . ?
C73 C74 H74 119.7 . . ?
C69 C74 H74 119.7 . . ?
N55 C75 C76 122.07(12) . . ?
N55 C75 N54 121.67(11) . . ?
C76 C75 N54 116.25(12) . . ?
C77 C76 C75 120.89(13) . . ?
C77 C76 H76 119.6 . . ?
C75 C76 H76 119.6 . . ?
C76 C77 C78 116.76(13) . . ?
C76 C77 C83 121.65(14) . . ?
C78 C77 C83 121.55(13) . . ?
C79 C78 C77 118.67(12) . . ?
C79 C78 C80 110.68(13) . . ?
C77 C78 C80 130.65(13) . . ?
N55 C79 C78 125.38(13) . . ?
N55 C79 C82 123.88(12) . . ?
C78 C79 C82 110.74(11) . . ?
C78 C80 C81 103.17(12) . . ?
C78 C80 H80A 111.1 . . ?
C81 C80 H80A 111.1 . . ?
C78 C80 H80B 111.1 . . ?
C81 C80 H80B 111.1 . . ?
H80A C80 H80B 109.1 . . ?
C82 C81 C80 106.34(11) . . ?
C82 C81 H81A 110.5 . . ?
C80 C81 H81A 110.5 . . ?
C82 C81 H81B 110.5 . . ?
C80 C81 H81B 110.5 . . ?
H81A C81 H81B 108.7 . . ?
O52 C82 C79 112.59(11) . . ?
O52 C82 C81 107.10(10) . . ?
C79 C82 C81 102.68(12) . . ?
O52 C82 H82 111.4 . . ?
C79 C82 H82 111.4 . . ?
C81 C82 H82 111.4 . . ?
C77 C83 H83A 109.5 . . ?
C77 C83 H83B 109.5 . . ?
H83A C83 H83B 109.5 . . ?
C77 C83 H83C 109.5 . . ?
H83A C83 H83C 109.5 . . ?
H83B C83 H83C 109.5 . . ?
O52 C84 C85 108.45(10) . . ?
O52 C84 H84A 110.0 . . ?
C85 C84 H84A 110.0 . . ?
O52 C84 H84B 110.0 . . ?
C85 C84 H84B 110.0 . . ?
H84A C84 H84B 108.4 . . ?
C86 C85 C90 118.37(14) . . ?
C86 C85 C84 120.67(13) . . ?
C90 C85 C84 120.95(13) . . ?
C85 C86 C87 121.00(14) . . ?
C85 C86 H86 119.5 . . ?
C87 C86 H86 119.5 . . ?
C88 C87 C86 120.05(15) . . ?
C88 C87 H87 120.0 . . ?
C86 C87 H87 120.0 . . ?
C87 C88 C89 119.67(14) . . ?
C87 C88 H88 120.2 . . ?
C89 C88 H88 120.2 . . ?
C88 C89 C90 119.95(14) . . ?
C88 C89 H89 120.0 . . ?
C90 C89 H89 120.0 . . ?
C89 C90 C85 120.93(14) . . ?
C89 C90 H90 119.5 . . ?
C85 C90 H90 119.5 . . ?
C57 C56 C55 121.19(11) . . ?
C57 C56 H56 119.4 . . ?
C55 C56 H56 119.4 . . ?
C118 O101 C116 112.54(9) . . ?
C134 O102 C132 113.01(10) . . ?
C101 N101 C104 112.32(10) . . ?
C101 N101 H10 125.1(11) . . ?
C104 N101 H10 122.5(11) . . ?
C104 N102 C109 121.66(11) . . ?
C113 N103 C109 115.82(11) . . ?
C101 N104 C125 122.71(10) . . ?
C129 N105 C125 115.46(11) . . ?
N104 C101 N101 130.51(11) . . ?
N104 C101 C102 123.58(11) . . ?
N101 C101 C102 105.92(10) . . ?
C105 C102 C103 121.50(11) . . ?
C105 C102 C101 130.59(11) . . ?
C103 C102 C101 107.91(10) . . ?
C108 C103 C102 120.97(11) . . ?
C108 C103 C104 130.91(12) . . ?
C102 C103 C104 108.03(10) . . ?
N102 C104 N101 130.28(11) . . ?
N102 C104 C103 124.03(11) . . ?
N101 C104 C103 105.68(10) . . ?
C102 C105 C106 117.52(12) . . ?
C102 C105 H10A 121.2 . . ?
C106 C105 H10A 121.2 . . ?
C107 C106 C105 121.10(12) . . ?
C107 C106 H10B 119.4 . . ?
C105 C106 H10B 119.4 . . ?
C108 C107 C106 121.30(12) . . ?
C108 C107 H10C 119.4 . . ?
C106 C107 H10C 119.4 . . ?
C103 C108 C107 117.59(12) . . ?
C103 C108 H10D 121.2 . . ?
C107 C108 H10D 121.2 . . ?
N103 C109 N102 120.49(11) . . ?
N103 C109 C110 122.51(11) . . ?
N102 C109 C110 116.84(11) . . ?
C111 C110 C109 120.55(11) . . ?
C111 C110 H11 119.7 . . ?
C109 C110 H11 119.7 . . ?
C110 C111 C112 116.61(11) . . ?
C110 C111 C117 122.08(12) . . ?
C112 C111 C117 121.31(12) . . ?
C113 C112 C111 118.65(11) . . ?
C113 C112 C114 111.01(11) . . ?
C111 C112 C114 130.34(12) . . ?
N103 C113 C112 125.83(11) . . ?
N103 C113 C116 123.22(11) . . ?
C112 C113 C116 110.86(11) . . ?
C112 C114 C115 103.02(10) . . ?
C112 C114 H11A 111.2 . . ?
C115 C114 H11A 111.2 . . ?
C112 C114 H11B 111.2 . . ?
C115 C114 H11B 111.2 . . ?
H11A C114 H11B 109.1 . . ?
C116 C115 C114 106.20(10) . . ?
C116 C115 H11C 110.5 . . ?
C114 C115 H11C 110.5 . . ?
C116 C115 H11D 110.5 . . ?
C114 C115 H11D 110.5 . . ?
H11C C115 H11D 108.7 . . ?
O101 C116 C113 105.82(10) . . ?
O101 C116 C115 112.27(10) . . ?
C113 C116 C115 102.61(10) . . ?
O101 C116 H11E 111.9 . . ?
C113 C116 H11E 111.9 . . ?
C115 C116 H11E 111.9 . . ?
C111 C117 H11F 109.5 . . ?
C111 C117 H11G 109.5 . . ?
H11F C117 H11G 109.5 . . ?
C111 C117 H11H 109.5 . . ?
H11F C117 H11H 109.5 . . ?
H11G C117 H11H 109.5 . . ?
O101 C118 C119 109.81(10) . . ?
O101 C118 H11I 109.7 . . ?
C119 C118 H11I 109.7 . . ?
O101 C118 H11J 109.7 . . ?
C119 C118 H11J 109.7 . . ?
H11I C118 H11J 108.2 . . ?
C120 C119 C124 119.12(12) . . ?
C120 C119 C118 121.36(11) . . ?
C124 C119 C118 119.52(12) . . ?
C119 C120 C121 120.34(12) . . ?
C119 C120 H12 119.8 . . ?
C121 C120 H12 119.8 . . ?
C122 C121 C120 120.17(13) . . ?
C122 C121 H12A 119.9 . . ?
C120 C121 H12A 119.9 . . ?
C123 C122 C121 119.78(13) . . ?
C123 C122 H12B 120.1 . . ?
C121 C122 H12B 120.1 . . ?
C122 C123 C124 119.96(13) . . ?
C122 C123 H12C 120.0 . . ?
C124 C123 H12C 120.0 . . ?
C123 C124 C119 120.63(13) . . ?
C123 C124 H12D 119.7 . . ?
C119 C124 H12D 119.7 . . ?
N105 C125 C126 122.57(11) . . ?
N105 C125 N104 121.82(11) . . ?
C126 C125 N104 115.53(11) . . ?
C127 C126 C125 121.14(12) . . ?
C127 C126 H12E 119.4 . . ?
C125 C126 H12E 119.4 . . ?
C128 C127 C126 116.03(12) . . ?
C128 C127 C133 121.92(13) . . ?
C126 C127 C133 122.03(13) . . ?
C129 C128 C127 119.34(12) . . ?
C129 C128 C130 111.03(13) . . ?
C127 C128 C130 129.62(13) . . ?
N105 C129 C128 125.40(12) . . ?
N105 C129 C132 123.72(11) . . ?
C128 C129 C132 110.81(11) . . ?
C128 C130 C131 103.36(11) . . ?
C128 C130 H13A 111.1 . . ?
C131 C130 H13A 111.1 . . ?
C128 C130 H13B 111.1 . . ?
C131 C130 H13B 111.1 . . ?
H13A C130 H13B 109.1 . . ?
C130 C131 C132 106.73(11) . . ?
C130 C131 H13C 110.4 . . ?
C132 C131 H13C 110.4 . . ?
C130 C131 H13D 110.4 . . ?
C132 C131 H13D 110.4 . . ?
H13C C131 H13D 108.6 . . ?
O102 C132 C129 105.97(10) . . ?
O102 C132 C131 112.70(11) . . ?
C129 C132 C131 101.97(11) . . ?
O102 C132 H13 111.9 . . ?
C129 C132 H13 111.9 . . ?
C131 C132 H13 111.9 . . ?
C127 C133 H13E 109.5 . . ?
C127 C133 H13F 109.5 . . ?
H13E C133 H13F 109.5 . . ?
C127 C133 H13G 109.5 . . ?
H13E C133 H13G 109.5 . . ?
H13F C133 H13G 109.5 . . ?
O102 C134 C135 113.98(11) . . ?
O102 C134 H13H 108.8 . . ?
C135 C134 H13H 108.8 . . ?
O102 C134 H13I 108.8 . . ?
C135 C134 H13I 108.8 . . ?
H13H C134 H13I 107.7 . . ?
C140 C135 C136 118.86(13) . . ?
C140 C135 C134 120.07(12) . . ?
C136 C135 C134 120.99(12) . . ?
C137 C136 C135 120.37(14) . . ?
C137 C136 H13J 119.8 . . ?
C135 C136 H13J 119.8 . . ?
C136 C137 C138 120.10(14) . . ?
C136 C137 H13K 120.0 . . ?
C138 C137 H13K 120.0 . . ?
C139 C138 C137 119.90(15) . . ?
C139 C138 H13L 120.1 . . ?
C137 C138 H13L 120.1 . . ?
C138 C139 C140 120.19(14) . . ?
C138 C139 H13M 119.9 . . ?
C140 C139 H13M 119.9 . . ?
C139 C140 C135 120.55(14) . . ?
C139 C140 H14 119.7 . . ?
C135 C140 H14 119.7 . . ?
C168 O151 C166 114.08(10) . . ?
C184 O152 C182 112.47(10) . . ?
C151 N151 C154 112.37(10) . . ?
C151 N151 H15 126.6(11) . . ?
C154 N151 H15 121.1(11) . . ?
C154 N152 C159 121.88(11) . . ?
C163 N153 C159 115.72(11) . . ?
C151 N154 C175 120.07(10) . . ?
C175 N155 C179 115.02(11) . . ?
N154 C151 N151 129.59(11) . . ?
N154 C151 C152 124.41(11) . . ?
N151 C151 C152 105.81(10) . . ?
C155 C152 C153 122.21(12) . . ?
C155 C152 C151 129.76(12) . . ?
C153 C152 C151 108.01(11) . . ?
C158 C153 C152 120.73(12) . . ?
C158 C153 C154 131.23(12) . . ?
C152 C153 C154 108.04(11) . . ?
N152 C154 N151 129.97(12) . . ?
N152 C154 C153 124.44(11) . . ?
N151 C154 C153 105.58(10) . . ?
C156 C155 C152 116.98(13) . . ?
C156 C155 H15A 121.5 . . ?
C152 C155 H15A 121.5 . . ?
C155 C156 C157 121.07(12) . . ?
C155 C156 H15B 119.5 . . ?
C157 C156 H15B 119.5 . . ?
C158 C157 C156 121.60(12) . . ?
C158 C157 H15C 119.2 . . ?
C156 C157 H15C 119.2 . . ?
C153 C158 C157 117.38(12) . . ?
C153 C158 H15D 121.3 . . ?
C157 C158 H15D 121.3 . . ?
N153 C159 C160 122.47(12) . . ?
N153 C159 N152 121.17(11) . . ?
C160 C159 N152 116.36(11) . . ?
C161 C160 C159 120.90(12) . . ?
C161 C160 H16 119.6 . . ?
C159 C160 H16 119.6 . . ?
C160 C161 C162 116.40(12) . . ?
C160 C161 C167 122.29(13) . . ?
C162 C161 C167 121.28(13) . . ?
C163 C162 C161 119.26(12) . . ?
C163 C162 C164 110.99(12) . . ?
C161 C162 C164 129.75(13) . . ?
N153 C163 C162 125.25(12) . . ?
N153 C163 C166 123.67(12) . . ?
C162 C163 C166 111.09(11) . . ?
C162 C164 C165 102.97(11) . . ?
C162 C164 H16A 111.2 . . ?
C165 C164 H16A 111.2 . . ?
C162 C164 H16B 111.2 . . ?
C165 C164 H16B 111.2 . . ?
H16A C164 H16B 109.1 . . ?
C166 C165 C164 106.60(11) . . ?
C166 C165 H16C 110.4 . . ?
C164 C165 H16C 110.4 . . ?
C166 C165 H16D 110.4 . . ?
C164 C165 H16D 110.4 . . ?
H16C C165 H16D 108.6 . . ?
O151 C166 C163 112.65(11) . . ?
O151 C166 C165 106.46(10) . . ?
C163 C166 C165 102.54(11) . . ?
O151 C166 H16E 111.6 . . ?
C163 C166 H16E 111.6 . . ?
C165 C166 H16E 111.6 . . ?
C161 C167 H16F 109.5 . . ?
C161 C167 H16G 109.5 . . ?
H16F C167 H16G 109.5 . . ?
C161 C167 H16H 109.5 . . ?
H16F C167 H16H 109.5 . . ?
H16G C167 H16H 109.5 . . ?
O151 C168 C169 107.68(11) . . ?
O151 C168 H16J 110.2 . . ?
C169 C168 H16J 110.2 . . ?
O151 C168 H16K 110.2 . . ?
C169 C168 H16K 110.2 . . ?
H16J C168 H16K 108.5 . . ?
C174 C169 C170 118.82(14) . . ?
C174 C169 C168 120.50(13) . . ?
C170 C169 C168 120.67(13) . . ?
C171 C170 C169 120.66(15) . . ?
C171 C170 H17 119.7 . . ?
C169 C170 H17 119.7 . . ?
C172 C171 C170 120.00(14) . . ?
C172 C171 H17A 120.0 . . ?
C170 C171 H17A 120.0 . . ?
C171 C172 C173 119.61(16) . . ?
C171 C172 H17B 120.2 . . ?
C173 C172 H17B 120.2 . . ?
C172 C173 C174 120.22(17) . . ?
C172 C173 H17C 119.9 . . ?
C174 C173 H17C 119.9 . . ?
C169 C174 C173 120.66(15) . . ?
C169 C174 H17D 119.7 . . ?
C173 C174 H17D 119.7 . . ?
N155 C175 C176 123.38(11) . . ?
N155 C175 N154 118.07(11) . . ?
C176 C175 N154 118.43(11) . . ?
C177 C176 C175 120.82(12) . . ?
C177 C176 H17E 119.6 . . ?
C175 C176 H17E 119.6 . . ?
C176 C177 C178 116.03(12) . . ?
C176 C177 C183 121.78(12) . . ?
C178 C177 C183 122.19(12) . . ?
C179 C178 C177 118.99(12) . . ?
C179 C178 C180 111.20(12) . . ?
C177 C178 C180 129.81(12) . . ?
N155 C179 C178 125.65(12) . . ?
N155 C179 C182 123.09(12) . . ?
C178 C179 C182 111.26(11) . . ?
C178 C180 C181 103.77(12) . . ?
C178 C180 H18A 111.0 . . ?
C181 C180 H18A 111.0 . . ?
C178 C180 H18B 111.0 . . ?
C181 C180 H18B 111.0 . . ?
H18A C180 H18B 109.0 . . ?
C180 C181 C182 107.94(13) . . ?
C180 C181 H18C 110.1 . . ?
C182 C181 H18C 110.1 . . ?
C180 C181 H18D 110.1 . . ?
C182 C181 H18D 110.1 . . ?
H18C C181 H18D 108.4 . . ?
O152 C182 C179 113.81(12) . . ?
O152 C182 C181 108.41(13) . . ?
C179 C182 C181 103.02(12) . . ?
O152 C182 H18 110.4 . . ?
C179 C182 H18 110.4 . . ?
C181 C182 H18 110.4 . . ?
C177 C183 H18E 109.5 . . ?
C177 C183 H18F 109.5 . . ?
H18E C183 H18F 109.5 . . ?
C177 C183 H18G 109.5 . . ?
H18E C183 H18G 109.5 . . ?
H18F C183 H18G 109.5 . . ?
O152 C184 C91 111.11(6) . . ?
O152 C184 H18H 109.4 . . ?
C91 C184 H18H 109.4 . . ?
O152 C184 H18I 109.4 . . ?
C91 C184 H18I 109.4 . . ?
H18H C184 H18I 108.0 . . ?
C96A C91 C92B 100.3(4) . . ?
C96A C91 C96B 18.9(4) . . ?
C92B C91 C96B 118.1(3) . . ?
C96A C91 C184 132.1(4) . . ?
C92B C91 C184 126.42(19) . . ?
C96B C91 C184 115.4(2) . . ?
C96A C91 C92A 115.5(4) . . ?
C92B C91 C92A 17.4(2) . . ?
C96B C91 C92A 131.7(2) . . ?
C184 C91 C92A 112.3 . . ?
C93A C92A C91 116.3(4) . . ?
C93A C92A H92A 121.9 . . ?
C91 C92A H92A 121.9 . . ?
C92A C93A C94A 121.8(7) . . ?
C92A C93A H93A 119.1 . . ?
C94A C93A H93A 119.1 . . ?
C95A C94A C93A 119.1(7) . . ?
C95A C94A H94A 120.4 . . ?
C93A C94A H94A 120.4 . . ?
C94A C95A C96A 119.4(8) . . ?
C94A C95A H95A 120.3 . . ?
C96A C95A H95A 120.3 . . ?
C91 C96A C95A 127.9(7) . . ?
C91 C96A H96A 116.1 . . ?
C95A C96A H96A 116.1 . . ?
C91 C92B C93B 123.1(4) . . ?
C91 C92B H92B 118.5 . . ?
C93B C92B H92B 118.5 . . ?
C94B C93B C92B 119.3(4) . . ?
C94B C93B H93B 120.4 . . ?
C92B C93B H93B 120.4 . . ?
C95B C94B C93B 119.3(4) . . ?
C95B C94B H94B 120.4 . . ?
C93B C94B H94B 120.4 . . ?
C94B C95B C96B 121.0(4) . . ?
C94B C95B H95B 119.5 . . ?
C96B C95B H95B 119.5 . . ?
C95B C96B C91 119.2(4) . . ?
C95B C96B H96B 120.4 . . ?
C91 C96B H96B 120.4 . . ?

loop_
_geom_torsion_atom_site_label_1
_geom_torsion_atom_site_label_2
_geom_torsion_atom_site_label_3
_geom_torsion_atom_site_label_4
_geom_torsion
_geom_torsion_site_symmetry_1
_geom_torsion_site_symmetry_2
_geom_torsion_site_symmetry_3
_geom_torsion_site_symmetry_4
_geom_torsion_publ_flag
C25 N4 C1 N1 -1.9(2) . . . . ?
C25 N4 C1 C2 176.47(11) . . . . ?
C4 N1 C1 N4 175.86(13) . . . . ?
C4 N1 C1 C2 -2.69(13) . . . . ?
N4 C1 C2 C5 3.9(2) . . . . ?
N1 C1 C2 C5 -177.42(12) . . . . ?
N4 C1 C2 C3 -176.01(12) . . . . ?
N1 C1 C2 C3 2.70(13) . . . . ?
C5 C2 C3 C8 -1.2(2) . . . . ?
C1 C2 C3 C8 178.73(12) . . . . ?
C5 C2 C3 C4 178.36(11) . . . . ?
C1 C2 C3 C4 -1.75(14) . . . . ?
C9 N2 C4 N1 -1.8(2) . . . . ?
C9 N2 C4 C3 -178.96(12) . . . . ?
C1 N1 C4 N2 -175.85(13) . . . . ?
C1 N1 C4 C3 1.65(13) . . . . ?
C2 C3 C4 N2 177.85(12) . . . . ?
C8 C3 C4 N2 -2.7(2) . . . . ?
C2 C3 C4 N1 0.14(14) . . . . ?
C8 C3 C4 N1 179.60(14) . . . . ?
C3 C2 C5 C6 0.49(19) . . . . ?
C1 C2 C5 C6 -179.38(13) . . . . ?
C2 C5 C6 C7 0.5(2) . . . . ?
C5 C6 C7 C8 -0.8(2) . . . . ?
C6 C7 C8 C3 0.1(2) . . . . ?
C2 C3 C8 C7 0.8(2) . . . . ?
C4 C3 C8 C7 -178.56(13) . . . . ?
C13 N3 C9 C10 -0.56(18) . . . . ?
C13 N3 C9 N2 -178.71(11) . . . . ?
C4 N2 C9 N3 -25.51(19) . . . . ?
C4 N2 C9 C10 156.21(13) . . . . ?
N3 C9 C10 C11 3.0(2) . . . . ?
N2 C9 C10 C11 -178.73(12) . . . . ?
C9 C10 C11 C12 -2.17(19) . . . . ?
C9 C10 C11 C17 177.97(13) . . . . ?
C10 C11 C12 C13 -0.83(18) . . . . ?
C17 C11 C12 C13 179.04(13) . . . . ?
C10 C11 C12 C14 177.29(13) . . . . ?
C17 C11 C12 C14 -2.9(2) . . . . ?
C9 N3 C13 C12 -2.72(18) . . . . ?
C9 N3 C13 C16 176.58(11) . . . . ?
C11 C12 C13 N3 3.50(19) . . . . ?
C14 C12 C13 N3 -174.92(11) . . . . ?
C11 C12 C13 C16 -175.89(11) . . . . ?
C14 C12 C13 C16 5.69(14) . . . . ?
C13 C12 C14 C15 9.30(14) . . . . ?
C11 C12 C14 C15 -168.93(13) . . . . ?
C12 C14 C15 C16 -20.42(13) . . . . ?
C18 O1 C16 C13 74.46(12) . . . . ?
C18 O1 C16 C15 -173.48(10) . . . . ?
N3 C13 C16 O1 -81.90(14) . . . . ?
C12 C13 C16 O1 97.49(12) . . . . ?
N3 C13 C16 C15 162.45(11) . . . . ?
C12 C13 C16 C15 -18.15(13) . . . . ?
C14 C15 C16 O1 -94.46(11) . . . . ?
C14 C15 C16 C13 23.43(12) . . . . ?
C16 O1 C18 C19 166.81(10) . . . . ?
O1 C18 C19 C20 99.11(14) . . . . ?
O1 C18 C19 C24 -83.08(15) . . . . ?
C24 C19 C20 C21 0.09(19) . . . . ?
C18 C19 C20 C21 177.93(12) . . . . ?
C19 C20 C21 C22 -0.3(2) . . . . ?
C20 C21 C22 C23 0.1(2) . . . . ?
C21 C22 C23 C24 0.4(2) . . . . ?
C22 C23 C24 C19 -0.63(19) . . . . ?
C20 C19 C24 C23 0.40(18) . . . . ?
C18 C19 C24 C23 -177.45(12) . . . . ?
C29 N5 C25 C26 1.92(17) . . . . ?
C29 N5 C25 N4 -177.81(10) . . . . ?
C1 N4 C25 N5 -0.41(18) . . . . ?
C1 N4 C25 C26 179.85(11) . . . . ?
N5 C25 C26 C27 0.16(19) . . . . ?
N4 C25 C26 C27 179.90(11) . . . . ?
C25 C26 C27 C28 -2.92(18) . . . . ?
C25 C26 C27 C33 176.06(11) . . . . ?
C26 C27 C28 C29 3.53(17) . . . . ?
C33 C27 C28 C29 -175.44(11) . . . . ?
C26 C27 C28 C30 -179.22(12) . . . . ?
C33 C27 C28 C30 1.8(2) . . . . ?
C25 N5 C29 C28 -1.23(17) . . . . ?
C25 N5 C29 C32 -175.95(11) . . . . ?
C27 C28 C29 N5 -1.55(18) . . . . ?
C30 C28 C29 N5 -179.29(11) . . . . ?
C27 C28 C29 C32 173.78(11) . . . . ?
C30 C28 C29 C32 -3.96(14) . . . . ?
C27 C28 C30 C31 171.67(12) . . . . ?
C29 C28 C30 C31 -10.90(13) . . . . ?
C28 C30 C31 C32 21.04(13) . . . . ?
C34 O2 C32 C29 -45.74(14) . . . . ?
C34 O2 C32 C31 76.13(13) . . . . ?
N5 C29 C32 O2 -39.90(16) . . . . ?
C28 C29 C32 O2 144.67(11) . . . . ?
N5 C29 C32 C31 -167.53(11) . . . . ?
C28 C29 C32 C31 17.04(13) . . . . ?
C30 C31 C32 O2 -152.47(10) . . . . ?
C30 C31 C32 C29 -23.15(12) . . . . ?
C32 O2 C34 C35 -167.03(10) . . . . ?
O2 C34 C35 C36 -104.86(14) . . . . ?
O2 C34 C35 C40 73.75(15) . . . . ?
C40 C35 C36 C37 0.8(2) . . . . ?
C34 C35 C36 C37 179.44(13) . . . . ?
C35 C36 C37 C38 -0.6(2) . . . . ?
C36 C37 C38 C39 0.2(2) . . . . ?
C37 C38 C39 C40 -0.1(2) . . . . ?
C38 C39 C40 C35 0.4(2) . . . . ?
C36 C35 C40 C39 -0.7(2) . . . . ?
C34 C35 C40 C39 -179.39(14) . . . . ?
C75 N54 C51 N51 -1.1(2) . . . . ?
C75 N54 C51 C52 177.97(11) . . . . ?
C54 N51 C51 N54 176.30(12) . . . . ?
C54 N51 C51 C52 -2.95(13) . . . . ?
N54 C51 C52 C55 4.2(2) . . . . ?
N51 C51 C52 C55 -176.50(12) . . . . ?
N54 C51 C52 C53 -176.52(12) . . . . ?
N51 C51 C52 C53 2.77(13) . . . . ?
C55 C52 C53 C58 -0.44(18) . . . . ?
C51 C52 C53 C58 -179.80(11) . . . . ?
C55 C52 C53 C54 177.71(11) . . . . ?
C51 C52 C53 C54 -1.65(13) . . . . ?
C59 N52 C54 N51 -8.7(2) . . . . ?
C59 N52 C54 C53 173.47(11) . . . . ?
C51 N51 C54 N52 -176.20(12) . . . . ?
C51 N51 C54 C53 1.96(14) . . . . ?
C58 C53 C54 N52 -3.9(2) . . . . ?
C52 C53 C54 N52 178.20(12) . . . . ?
C58 C53 C54 N51 177.84(12) . . . . ?
C52 C53 C54 N51 -0.08(13) . . . . ?
C53 C52 C55 C56 0.42(18) . . . . ?
C51 C52 C55 C56 179.61(12) . . . . ?
C52 C53 C58 C57 0.19(18) . . . . ?
C54 C53 C58 C57 -177.49(12) . . . . ?
C56 C57 C58 C53 0.05(19) . . . . ?
C63 N53 C59 C60 1.40(18) . . . . ?
C63 N53 C59 N52 -172.53(11) . . . . ?
C54 N52 C59 N53 -37.48(17) . . . . ?
C54 N52 C59 C60 148.27(12) . . . . ?
N53 C59 C60 C61 -0.4(2) . . . . ?
N52 C59 C60 C61 173.57(12) . . . . ?
C59 C60 C61 C62 -0.7(2) . . . . ?
C59 C60 C61 C67 -179.59(14) . . . . ?
C60 C61 C62 C63 0.7(2) . . . . ?
C67 C61 C62 C63 179.64(14) . . . . ?
C60 C61 C62 C64 -179.56(14) . . . . ?
C67 C61 C62 C64 -0.6(2) . . . . ?
C59 N53 C63 C62 -1.37(18) . . . . ?
C59 N53 C63 C66 175.90(11) . . . . ?
C61 C62 C63 N53 0.3(2) . . . . ?
C64 C62 C63 N53 -179.45(12) . . . . ?
C61 C62 C63 C66 -177.26(12) . . . . ?
C64 C62 C63 C66 2.95(16) . . . . ?
C63 C62 C64 C65 14.88(15) . . . . ?
C61 C62 C64 C65 -164.87(14) . . . . ?
C62 C64 C65 C66 -26.64(14) . . . . ?
C68 O51 C66 C63 69.37(13) . . . . ?
C68 O51 C66 C65 -179.35(11) . . . . ?
N53 C63 C66 O51 -81.85(15) . . . . ?
C62 C63 C66 O51 95.77(13) . . . . ?
N53 C63 C66 C65 162.89(12) . . . . ?
C62 C63 C66 C65 -19.50(14) . . . . ?
C64 C65 C66 O51 -89.60(12) . . . . ?
C64 C65 C66 C63 28.07(13) . . . . ?
C66 O51 C68 C69 167.64(11) . . . . ?
O51 C68 C69 C74 -75.46(16) . . . . ?
O51 C68 C69 C70 107.92(14) . . . . ?
C74 C69 C70 C71 0.35(19) . . . . ?
C68 C69 C70 C71 177.05(12) . . . . ?
C69 C70 C71 C72 -0.37(19) . . . . ?
C70 C71 C72 C73 0.25(19) . . . . ?
C71 C72 C73 C74 -0.1(2) . . . . ?
C72 C73 C74 C69 0.1(2) . . . . ?
C70 C69 C74 C73 -0.19(19) . . . . ?
C68 C69 C74 C73 -176.84(12) . . . . ?
C79 N55 C75 C76 -0.05(18) . . . . ?
C79 N55 C75 N54 179.36(11) . . . . ?
C51 N54 C75 N55 3.22(19) . . . . ?
C51 N54 C75 C76 -177.34(11) . . . . ?
N55 C75 C76 C77 0.9(2) . . . . ?
N54 C75 C76 C77 -178.50(11) . . . . ?
C75 C76 C77 C78 -0.59(19) . . . . ?
C75 C76 C77 C83 177.22(12) . . . . ?
C76 C77 C78 C79 -0.56(18) . . . . ?
C83 C77 C78 C79 -178.37(13) . . . . ?
C76 C77 C78 C80 178.64(13) . . . . ?
C83 C77 C78 C80 0.8(2) . . . . ?
C75 N55 C79 C78 -1.21(19) . . . . ?
C75 N55 C79 C82 179.10(11) . . . . ?
C77 C78 C79 N55 1.6(2) . . . . ?
C80 C78 C79 N55 -177.80(12) . . . . ?
C77 C78 C79 C82 -178.73(11) . . . . ?
C80 C78 C79 C82 1.93(15) . . . . ?
C79 C78 C80 C81 13.72(15) . . . . ?
C77 C78 C80 C81 -165.53(14) . . . . ?
C78 C80 C81 C82 -23.77(14) . . . . ?
C84 O52 C82 C79 69.86(15) . . . . ?
C84 O52 C82 C81 -178.01(12) . . . . ?
N55 C79 C82 O52 -82.21(15) . . . . ?
C78 C79 C82 O52 98.07(13) . . . . ?
N55 C79 C82 C81 162.96(12) . . . . ?
C78 C79 C82 C81 -16.77(14) . . . . ?
C80 C81 C82 O52 -94.09(13) . . . . ?
C80 C81 C82 C79 24.67(13) . . . . ?
C82 O52 C84 C85 170.34(11) . . . . ?
O52 C84 C85 C86 -117.91(15) . . . . ?
O52 C84 C85 C90 61.27(17) . . . . ?
C90 C85 C86 C87 0.5(2) . . . . ?
C84 C85 C86 C87 179.66(15) . . . . ?
C85 C86 C87 C88 -0.8(3) . . . . ?
C86 C87 C88 C89 0.0(3) . . . . ?
C87 C88 C89 C90 1.2(2) . . . . ?
C88 C89 C90 C85 -1.6(2) . . . . ?
C86 C85 C90 C89 0.7(2) . . . . ?
C84 C85 C90 C89 -178.47(13) . . . . ?
C58 C57 C56 C55 0.0(2) . . . . ?
C52 C55 C56 C57 -0.19(19) . . . . ?
C125 N104 C101 N101 -4.2(2) . . . . ?
C125 N104 C101 C102 175.58(11) . . . . ?
C104 N101 C101 N104 178.69(13) . . . . ?
C104 N101 C101 C102 -1.12(13) . . . . ?
N104 C101 C102 C105 3.3(2) . . . . ?
N101 C101 C102 C105 -176.83(12) . . . . ?
N104 C101 C102 C103 -176.70(12) . . . . ?
N101 C101 C102 C103 3.12(13) . . . . ?
C105 C102 C103 C108 -0.96(19) . . . . ?
C101 C102 C103 C108 179.08(12) . . . . ?
C105 C102 C103 C104 176.10(11) . . . . ?
C101 C102 C103 C104 -3.86(13) . . . . ?
C109 N102 C104 N101 -8.3(2) . . . . ?
C109 N102 C104 C103 170.24(12) . . . . ?
C101 N101 C104 N102 177.52(13) . . . . ?
C101 N101 C104 C103 -1.19(14) . . . . ?
C108 C103 C104 N102 1.0(2) . . . . ?
C102 C103 C104 N102 -175.65(12) . . . . ?
C108 C103 C104 N101 179.83(13) . . . . ?
C102 C103 C104 N101 3.16(13) . . . . ?
C103 C102 C105 C106 0.59(18) . . . . ?
C101 C102 C105 C106 -179.46(12) . . . . ?
C102 C105 C106 C107 0.49(19) . . . . ?
C105 C106 C107 C108 -1.2(2) . . . . ?
C102 C103 C108 C107 0.2(2) . . . . ?
C104 C103 C108 C107 -176.08(13) . . . . ?
C106 C107 C108 C103 0.9(2) . . . . ?
C113 N103 C109 N102 -175.16(11) . . . . ?
C113 N103 C109 C110 0.15(18) . . . . ?
C104 N102 C109 N103 -11.67(18) . . . . ?
C104 N102 C109 C110 172.76(12) . . . . ?
N103 C109 C110 C111 1.06(19) . . . . ?
N102 C109 C110 C111 176.52(12) . . . . ?
C109 C110 C111 C112 -0.75(19) . . . . ?
C109 C110 C111 C117 179.53(13) . . . . ?
C110 C111 C112 C113 -0.65(18) . . . . ?
C117 C111 C112 C113 179.07(12) . . . . ?
C110 C111 C112 C114 -179.66(13) . . . . ?
C117 C111 C112 C114 0.1(2) . . . . ?
C109 N103 C113 C112 -1.71(18) . . . . ?
C109 N103 C113 C116 174.60(11) . . . . ?
C111 C112 C113 N103 2.01(19) . . . . ?
C114 C112 C113 N103 -178.79(12) . . . . ?
C111 C112 C113 C116 -174.68(11) . . . . ?
C114 C112 C113 C116 4.51(15) . . . . ?
C113 C112 C114 C115 11.46(14) . . . . ?
C111 C112 C114 C115 -169.47(13) . . . . ?
C112 C114 C115 C116 -22.52(13) . . . . ?
C118 O101 C116 C113 162.83(10) . . . . ?
C118 O101 C116 C115 -86.00(13) . . . . ?
N103 C113 C116 O101 -77.46(14) . . . . ?
C112 C113 C116 O101 99.33(12) . . . . ?
N103 C113 C116 C115 164.70(12) . . . . ?
C112 C113 C116 C115 -18.50(13) . . . . ?
C114 C115 C116 O101 -88.29(12) . . . . ?
C114 C115 C116 C113 24.88(13) . . . . ?
C116 O101 C118 C119 160.26(10) . . . . ?
O101 C118 C119 C120 12.29(17) . . . . ?
O101 C118 C119 C124 -168.40(11) . . . . ?
C124 C119 C120 C121 -0.2(2) . . . . ?
C118 C119 C120 C121 179.14(13) . . . . ?
C119 C120 C121 C122 0.1(2) . . . . ?
C120 C121 C122 C123 0.0(2) . . . . ?
C121 C122 C123 C124 0.0(2) . . . . ?
C122 C123 C124 C119 -0.1(2) . . . . ?
C120 C119 C124 C123 0.2(2) . . . . ?
C118 C119 C124 C123 -179.14(13) . . . . ?
C129 N105 C125 C126 -0.85(18) . . . . ?
C129 N105 C125 N104 -177.75(11) . . . . ?
C101 N104 C125 N105 -10.78(19) . . . . ?
C101 N104 C125 C126 172.11(12) . . . . ?
N105 C125 C126 C127 1.4(2) . . . . ?
N104 C125 C126 C127 178.44(11) . . . . ?
C125 C126 C127 C128 0.06(19) . . . . ?
C125 C126 C127 C133 -178.12(12) . . . . ?
C126 C127 C128 C129 -1.81(18) . . . . ?
C133 C127 C128 C129 176.37(12) . . . . ?
C126 C127 C128 C130 179.23(13) . . . . ?
C133 C127 C128 C130 -2.6(2) . . . . ?
C125 N105 C129 C128 -1.07(19) . . . . ?
C125 N105 C129 C132 175.62(11) . . . . ?
C127 C128 C129 N105 2.5(2) . . . . ?
C130 C128 C129 N105 -178.38(12) . . . . ?
C127 C128 C129 C132 -174.58(11) . . . . ?
C130 C128 C129 C132 4.56(15) . . . . ?
C129 C128 C130 C131 11.22(15) . . . . ?
C127 C128 C130 C131 -169.75(14) . . . . ?
C128 C130 C131 C132 -22.27(14) . . . . ?
C134 O102 C132 C129 177.57(10) . . . . ?
C134 O102 C132 C131 -71.72(14) . . . . ?
N105 C129 C132 O102 -77.14(15) . . . . ?
C128 C129 C132 O102 99.98(12) . . . . ?
N105 C129 C132 C131 164.76(12) . . . . ?
C128 C129 C132 C131 -18.13(14) . . . . ?
C130 C131 C132 O102 -88.71(14) . . . . ?
C130 C131 C132 C129 24.47(14) . . . . ?
C132 O102 C134 C135 -70.80(14) . . . . ?
O102 C134 C135 C140 145.83(12) . . . . ?
O102 C134 C135 C136 -37.56(18) . . . . ?
C140 C135 C136 C137 1.8(2) . . . . ?
C134 C135 C136 C137 -174.86(13) . . . . ?
C135 C136 C137 C138 -0.3(2) . . . . ?
C136 C137 C138 C139 -1.2(2) . . . . ?
C137 C138 C139 C140 1.2(2) . . . . ?
C138 C139 C140 C135 0.3(2) . . . . ?
C136 C135 C140 C139 -1.8(2) . . . . ?
C134 C135 C140 C139 174.89(13) . . . . ?
C175 N154 C151 N151 -3.6(2) . . . . ?
C175 N154 C151 C152 -177.96(11) . . . . ?
C154 N151 C151 N154 -170.83(13) . . . . ?
C154 N151 C151 C152 4.30(14) . . . . ?
N154 C151 C152 C155 -7.4(2) . . . . ?
N151 C151 C152 C155 177.19(13) . . . . ?
N154 C151 C152 C153 171.16(12) . . . . ?
N151 C151 C152 C153 -4.29(14) . . . . ?
C155 C152 C153 C158 1.89(19) . . . . ?
C151 C152 C153 C158 -176.77(11) . . . . ?
C155 C152 C153 C154 -178.58(12) . . . . ?
C151 C152 C153 C154 2.77(14) . . . . ?
C159 N152 C154 N151 -0.3(2) . . . . ?
C159 N152 C154 C153 179.30(11) . . . . ?
C151 N151 C154 N152 177.06(13) . . . . ?
C151 N151 C154 C153 -2.64(14) . . . . ?
C158 C153 C154 N152 -0.5(2) . . . . ?
C152 C153 C154 N152 -179.95(12) . . . . ?
C158 C153 C154 N151 179.24(13) . . . . ?
C152 C153 C154 N151 -0.23(14) . . . . ?
C153 C152 C155 C156 -1.20(19) . . . . ?
C151 C152 C155 C156 177.14(13) . . . . ?
C152 C155 C156 C157 -0.3(2) . . . . ?
C155 C156 C157 C158 1.2(2) . . . . ?
C152 C153 C158 C157 -0.99(19) . . . . ?
C154 C153 C158 C157 179.60(13) . . . . ?
C156 C157 C158 C153 -0.5(2) . . . . ?
C163 N153 C159 C160 0.22(18) . . . . ?
C163 N153 C159 N152 179.57(11) . . . . ?
C154 N152 C159 N153 1.01(19) . . . . ?
C154 N152 C159 C160 -179.60(12) . . . . ?
N153 C159 C160 C161 0.8(2) . . . . ?
N152 C159 C160 C161 -178.55(12) . . . . ?
C159 C160 C161 C162 -1.07(19) . . . . ?
C159 C160 C161 C167 177.17(12) . . . . ?
C160 C161 C162 C163 0.32(19) . . . . ?
C167 C161 C162 C163 -177.93(12) . . . . ?
C160 C161 C162 C164 179.86(13) . . . . ?
C167 C161 C162 C164 1.6(2) . . . . ?
C159 N153 C163 C162 -1.03(19) . . . . ?
C159 N153 C163 C166 178.74(11) . . . . ?
C161 C162 C163 N153 0.8(2) . . . . ?
C164 C162 C163 N153 -178.84(12) . . . . ?
C161 C162 C163 C166 -179.02(11) . . . . ?
C164 C162 C163 C166 1.36(15) . . . . ?
C163 C162 C164 C165 13.45(14) . . . . ?
C161 C162 C164 C165 -166.12(13) . . . . ?
C162 C164 C165 C166 -22.80(14) . . . . ?
C168 O151 C166 C163 66.85(14) . . . . ?
C168 O151 C166 C165 178.48(11) . . . . ?
N153 C163 C166 O151 -81.40(15) . . . . ?
C162 C163 C166 O151 98.40(13) . . . . ?
N153 C163 C166 C165 164.56(12) . . . . ?
C162 C163 C166 C165 -15.64(14) . . . . ?
C164 C165 C166 O151 -95.12(12) . . . . ?
C164 C165 C166 C163 23.38(13) . . . . ?
C166 O151 C168 C169 167.83(11) . . . . ?
O151 C168 C169 C174 114.51(15) . . . . ?
O151 C168 C169 C170 -63.90(16) . . . . ?
C174 C169 C170 C171 1.9(2) . . . . ?
C168 C169 C170 C171 -179.68(13) . . . . ?
C169 C170 C171 C172 -1.1(2) . . . . ?
C170 C171 C172 C173 -0.2(3) . . . . ?
C171 C172 C173 C174 0.6(3) . . . . ?
C170 C169 C174 C173 -1.5(2) . . . . ?
C168 C169 C174 C173 -179.95(17) . . . . ?
C172 C173 C174 C169 0.3(3) . . . . ?
C179 N155 C175 C176 2.54(18) . . . . ?
C179 N155 C175 N154 -173.30(11) . . . . ?
C151 N154 C175 N155 -65.87(16) . . . . ?
C151 N154 C175 C176 118.08(13) . . . . ?
N155 C175 C176 C177 -0.08(19) . . . . ?
N154 C175 C176 C177 175.74(11) . . . . ?
C175 C176 C177 C178 -2.70(18) . . . . ?
C175 C176 C177 C183 177.42(12) . . . . ?
C176 C177 C178 C179 2.93(18) . . . . ?
C183 C177 C178 C179 -177.19(12) . . . . ?
C176 C177 C178 C180 -176.71(13) . . . . ?
C183 C177 C178 C180 3.2(2) . . . . ?
C175 N155 C179 C178 -2.29(19) . . . . ?
C175 N155 C179 C182 178.33(12) . . . . ?
C177 C178 C179 N155 -0.5(2) . . . . ?
C180 C178 C179 N155 179.23(12) . . . . ?
C177 C178 C179 C182 178.97(12) . . . . ?
C180 C178 C179 C182 -1.33(16) . . . . ?
C179 C178 C180 C181 -9.18(17) . . . . ?
C177 C178 C180 C181 170.48(15) . . . . ?
C178 C180 C181 C182 15.90(19) . . . . ?
C184 O152 C182 C179 85.90(13) . . . . ?
C184 O152 C182 C181 -160.13(12) . . . . ?
N155 C179 C182 O152 -52.29(18) . . . . ?
C178 C179 C182 O152 128.26(12) . . . . ?
N155 C179 C182 C181 -169.43(14) . . . . ?
C178 C179 C182 C181 11.12(17) . . . . ?
C180 C181 C182 O152 -137.43(15) . . . . ?
C180 C181 C182 C179 -16.53(19) . . . . ?
C182 O152 C184 C91 -175.33(8) . . . . ?
O152 C184 C91 C96A -146.4(7) . . . . ?
O152 C184 C91 C92B 48.2(2) . . . . ?
O152 C184 C91 C96B -135.7(3) . . . . ?
O152 C184 C91 C92A 36.50(6) . . . . ?
C96A C91 C92A C93A 0.2(7) . . . . ?
C92B C91 C92A C93A 30.9(6) . . . . ?
C96B C91 C92A C93A -11.6(5) . . . . ?
C184 C91 C92A C93A 177.8(4) . . . . ?
C91 C92A C93A C94A -2.0(8) . . . . ?
C92A C93A C94A C95A 1.7(12) . . . . ?
C93A C94A C95A C96A 0.5(14) . . . . ?
C92B C91 C96A C95A -6.8(12) . . . . ?
C96B C91 C96A C95A 154(3) . . . . ?
C184 C91 C96A C95A -174.9(7) . . . . ?
C92A C91 C96A C95A 2.1(13) . . . . ?
C94A C95A C96A C91 -2.6(16) . . . . ?
C96A C91 C92B C93B 5.5(7) . . . . ?
C96B C91 C92B C93B -1.4(5) . . . . ?
C184 C91 C92B C93B 174.6(3) . . . . ?
C92A C91 C92B C93B -146.5(7) . . . . ?
C91 C92B C93B C94B 0.8(6) . . . . ?
C92B C93B C94B C95B 1.3(7) . . . . ?
C93B C94B C95B C96B -2.8(7) . . . . ?
C94B C95B C96B C91 2.2(7) . . . . ?
C96A C91 C96B C95B -21.6(19) . . . . ?
C92B C91 C96B C95B -0.1(6) . . . . ?
C184 C91 C96B C95B -176.5(3) . . . . ?
C92A C91 C96B C95B 13.1(6) . . . . ?

_diffrn_measured_fraction_theta_max 0.997
_diffrn_reflns_theta_full        66.97
_diffrn_measured_fraction_theta_full 1.000
_refine_diff_density_max         0.181
_refine_diff_density_min         -0.201
_refine_diff_density_rms         0.039
_audit_creation_date
;
'Mon Nov 14 10:14:33 2011'
;
_cell_oxdiff_length_a            18.4175(2)
_cell_oxdiff_length_b            14.0270(2)
_cell_oxdiff_length_c            25.7604(3)
_cell_oxdiff_angle_alpha         90.0520(11)
_cell_oxdiff_angle_beta          102.0200(11)
_cell_oxdiff_angle_gamma         89.9828(11)
_cell_oxdiff_volume              6509.05(15)
_cell_oxdiff_measurement_reflns_used 120815
_diffrn_orient_matrix_UB_11      -0.0435704000
_diffrn_orient_matrix_UB_12      0.0828945000
_diffrn_orient_matrix_UB_13      0.0182768000
_diffrn_orient_matrix_UB_21      -0.0455871000
_diffrn_orient_matrix_UB_22      0.0110190000
_diffrn_orient_matrix_UB_23      -0.0570230000
_diffrn_orient_matrix_UB_31      -0.0577694000
_diffrn_orient_matrix_UB_32      -0.0711981000
_diffrn_orient_matrix_UB_33      0.0123695000
_diffrn_measurement_details
;
#__ type_ start__ end____ width___ exp.time_
  1 omega  -65.00   17.00   1.0000    1.5000
omega____ theta____ kappa____ phi______ frames
    -        0.0000  -57.0000 -180.0000 82

#__ type_ start__ end____ width___ exp.time_
  2 omega  -21.00   69.00   1.0000    1.5000
omega____ theta____ kappa____ phi______ frames
    -        0.0000   57.0000  -30.0000 90

#__ type_ start__ end____ width___ exp.time_
  3 omega  -29.00   67.00   1.0000    1.5000
omega____ theta____ kappa____ phi______ frames
    -        0.0000   77.0000 -150.0000 96

#__ type_ start__ end____ width___ exp.time_
  4 omega   -6.00   21.00   1.0000    1.5000
omega____ theta____ kappa____ phi______ frames
    -       22.0000   77.0000  -89.0000 27

#__ type_ start__ end____ width___ exp.time_
  5 omega   31.00   87.00   1.0000    1.5000
omega____ theta____ kappa____ phi______ frames
    -       22.0000   77.0000  -89.0000 56

#__ type_ start__ end____ width___ exp.time_
  6 omega    3.00   29.00   1.0000    3.0000
omega____ theta____ kappa____ phi______ frames
    -       34.0000   80.0000   39.0000 26

#__ type_ start__ end____ width___ exp.time_
  7 omega    8.00   43.00   1.0000    3.0000
omega____ theta____ kappa____ phi______ frames
    -       38.0000   80.0000   57.0000 35

#__ type_ start__ end____ width___ exp.time_
  8 omega   11.00   36.00   1.0000    3.0000
omega____ theta____ kappa____ phi______ frames
    -       42.0000   79.0000 -149.0000 25

#__ type_ start__ end____ width___ exp.time_
  9 omega  -50.00   30.00   1.0000    3.0000
omega____ theta____ kappa____ phi______ frames
    -      -42.5000   38.0000 -180.0000 80

#__ type_ start__ end____ width___ exp.time_
 10 omega   15.00   40.00   1.0000    3.0000
omega____ theta____ kappa____ phi______ frames
    -       46.0000   78.0000   76.0000 25

#__ type_ start__ end____ width___ exp.time_
 11 omega   14.00   39.00   1.0000    3.0000
omega____ theta____ kappa____ phi______ frames
    -       46.0000   80.0000  137.0000 25

#__ type_ start__ end____ width___ exp.time_
 12 omega   14.00   39.00   1.0000    3.0000
omega____ theta____ kappa____ phi______ frames
    -       46.0000   80.0000  -61.0000 25

#__ type_ start__ end____ width___ exp.time_
 13 omega   19.00   44.00   1.0000    3.0000
omega____ theta____ kappa____ phi______ frames
    -       50.0000   79.0000  146.0000 25

#__ type_ start__ end____ width___ exp.time_
 14 omega   18.00   43.00   1.0000    3.0000
omega____ theta____ kappa____ phi______ frames
    -       50.0000   80.0000 -145.0000 25

#__ type_ start__ end____ width___ exp.time_
 15 omega   19.00   44.00   1.0000    3.0000
omega____ theta____ kappa____ phi______ frames
    -       50.0000   78.0000  -95.0000 25

#__ type_ start__ end____ width___ exp.time_
 16 omega   19.00   44.00   1.0000    3.0000
omega____ theta____ kappa____ phi______ frames
    -       50.0000   79.0000   40.0000 25

#__ type_ start__ end____ width___ exp.time_
 17 omega   19.00   44.00   1.0000    3.0000
omega____ theta____ kappa____ phi______ frames
    -       50.0000   79.0000  -21.0000 25

#__ type_ start__ end____ width___ exp.time_
 18 omega   23.00   48.00   1.0000    3.0000
omega____ theta____ kappa____ phi______ frames
    -       54.0000   78.0000  177.0000 25

#__ type_ start__ end____ width___ exp.time_
 19 omega   23.00   48.00   1.0000    3.0000
omega____ theta____ kappa____ phi______ frames
    -       54.0000   78.0000   14.0000 25

#__ type_ start__ end____ width___ exp.time_
 20 omega   16.00   78.00   1.0000    3.0000
omega____ theta____ kappa____ phi______ frames
    -       55.1171  -80.0000 -143.0000 62

#__ type_ start__ end____ width___ exp.time_
 21 omega   29.00   55.00   1.0000    3.0000
omega____ theta____ kappa____ phi______ frames
    -       58.0000   75.0000  -69.0000 26

#__ type_ start__ end____ width___ exp.time_
 22 omega   29.00   55.00   1.0000    3.0000
omega____ theta____ kappa____ phi______ frames
    -       58.0000   76.0000   79.0000 26

#__ type_ start__ end____ width___ exp.time_
 23 omega   75.00  128.00   1.0000    3.0000
omega____ theta____ kappa____ phi______ frames
    -       58.0000   77.0000  129.0000 53

#__ type_ start__ end____ width___ exp.time_
 24 omega   28.00   58.00   1.0000    3.0000
omega____ theta____ kappa____ phi______ frames
    -       58.0000   77.0000  129.0000 30

#__ type_ start__ end____ width___ exp.time_
 25 omega   70.00   96.00   1.0000    3.0000
omega____ theta____ kappa____ phi______ frames
    -       58.0000   75.0000  -69.0000 26

#__ type_ start__ end____ width___ exp.time_
 26 omega   30.00  125.00   1.0000    3.0000
omega____ theta____ kappa____ phi______ frames
    -       58.0000   73.0000   50.0000 95

#__ type_ start__ end____ width___ exp.time_
 27 omega   30.00   65.00   1.0000    3.0000
omega____ theta____ kappa____ phi______ frames
    -       58.0000   76.0000  151.0000 35

#__ type_ start__ end____ width___ exp.time_
 28 omega   29.00   78.00   1.0000    3.0000
omega____ theta____ kappa____ phi______ frames
    -       58.0000   76.0000  -25.0000 49

#__ type_ start__ end____ width___ exp.time_
 29 omega   91.00  128.00   1.0000    3.0000
omega____ theta____ kappa____ phi______ frames
    -       58.0000   77.0000 -146.0000 37

#__ type_ start__ end____ width___ exp.time_
 30 omega   84.00  128.00   1.0000    3.0000
omega____ theta____ kappa____ phi______ frames
    -       58.0000   76.0000 -101.0000 44

#__ type_ start__ end____ width___ exp.time_
 31 omega   29.00   55.00   1.0000    3.0000
omega____ theta____ kappa____ phi______ frames
    -       58.0000   76.0000 -101.0000 26

#__ type_ start__ end____ width___ exp.time_
 32 omega   32.00   58.00   1.0000    3.0000
omega____ theta____ kappa____ phi______ frames
    -       58.0000   77.0000 -146.0000 26

#__ type_ start__ end____ width___ exp.time_
 33 omega  102.00  128.00   1.0000    3.0000
omega____ theta____ kappa____ phi______ frames
    -       58.0000   76.0000  151.0000 26

#__ type_ start__ end____ width___ exp.time_
 34 omega   33.00  132.00   1.0000    3.0000
omega____ theta____ kappa____ phi______ frames
    -       62.0000   76.0000    0.0000 99

#__ type_ start__ end____ width___ exp.time_
 35 omega   35.00   84.00   1.0000    3.0000
omega____ theta____ kappa____ phi______ frames
    -       62.0000   71.0000  -91.0000 49

#__ type_ start__ end____ width___ exp.time_
 36 omega  103.00  132.00   1.0000    3.0000
omega____ theta____ kappa____ phi______ frames
    -       62.0000   76.0000  172.0000 29

#__ type_ start__ end____ width___ exp.time_
 37 omega   33.00   69.00   1.0000    3.0000
omega____ theta____ kappa____ phi______ frames
    -       62.0000   76.0000  172.0000 36

#__ type_ start__ end____ width___ exp.time_
 38 omega   32.00  104.00   1.0000    3.0000
omega____ theta____ kappa____ phi______ frames
    -       62.0000   77.0000 -164.0000 72

#__ type_ start__ end____ width___ exp.time_
 39 omega   36.00  131.00   1.0000    3.0000
omega____ theta____ kappa____ phi______ frames
    -       62.0000   70.0000   89.0000 95

#__ type_ start__ end____ width___ exp.time_
 40 omega   31.00   85.00   1.0000    3.0000
omega____ theta____ kappa____ phi______ frames
    -       66.0000  -80.0000  141.0000 54

#__ type_ start__ end____ width___ exp.time_
 41 omega    3.00   83.00   1.0000    3.0000
omega____ theta____ kappa____ phi______ frames
    -       66.0000  -80.0000   50.0000 80

#__ type_ start__ end____ width___ exp.time_
 42 omega   -1.00   90.00   1.0000    3.0000
omega____ theta____ kappa____ phi______ frames
    -       70.0000  -80.0000  -81.0000 91

#__ type_ start__ end____ width___ exp.time_
 43 omega   88.00  113.00   1.0000    6.0000
omega____ theta____ kappa____ phi______ frames
    -      110.2342   63.0000   60.0000 25

#__ type_ start__ end____ width___ exp.time_
 44 omega  122.00  178.00   1.0000    6.0000
omega____ theta____ kappa____ phi______ frames
    -      110.2342   77.0000 -150.0000 56

#__ type_ start__ end____ width___ exp.time_
 45 omega   80.00  106.00   1.0000    6.0000
omega____ theta____ kappa____ phi______ frames
    -      110.2342   77.0000 -150.0000 26

#__ type_ start__ end____ width___ exp.time_
 46 omega   80.00  106.00   1.0000    6.0000
omega____ theta____ kappa____ phi______ frames
    -      110.2342   77.0000  150.0000 26

#__ type_ start__ end____ width___ exp.time_
 47 omega   80.00  170.00   1.0000    6.0000
omega____ theta____ kappa____ phi______ frames
    -      110.2342   77.0000   30.0000 90

#__ type_ start__ end____ width___ exp.time_
 48 omega   80.00  160.00   1.0000    6.0000
omega____ theta____ kappa____ phi______ frames
    -      110.2342   77.0000    0.0000 80

#__ type_ start__ end____ width___ exp.time_
 49 omega  110.00  177.00   1.0000    6.0000
omega____ theta____ kappa____ phi______ frames
    -      110.2342   77.0000  -90.0000 67

#__ type_ start__ end____ width___ exp.time_
 50 omega   80.00  106.00   1.0000    6.0000
omega____ theta____ kappa____ phi______ frames
    -      110.2342   77.0000  -90.0000 26

#__ type_ start__ end____ width___ exp.time_
 51 omega  120.00  178.00   1.0000    6.0000
omega____ theta____ kappa____ phi______ frames
    -      110.2342   77.0000 -180.0000 58

#__ type_ start__ end____ width___ exp.time_
 52 omega   80.00  105.00   1.0000    6.0000
omega____ theta____ kappa____ phi______ frames
    -      110.2342   77.0000 -180.0000 25

#__ type_ start__ end____ width___ exp.time_
 53 omega  114.00  173.00   1.0000    6.0000
omega____ theta____ kappa____ phi______ frames
    -      110.2342   77.0000   90.0000 59

#__ type_ start__ end____ width___ exp.time_
 54 omega   80.00  177.00   1.0000    6.0000
omega____ theta____ kappa____ phi______ frames
    -      110.2342   77.0000   60.0000 97

#__ type_ start__ end____ width___ exp.time_
 55 omega   80.00  106.00   1.0000    6.0000
omega____ theta____ kappa____ phi______ frames
    -      110.2342   77.0000   90.0000 26

#__ type_ start__ end____ width___ exp.time_
 56 omega   80.00  106.00   1.0000    6.0000
omega____ theta____ kappa____ phi______ frames
    -      110.2342   77.0000 -120.0000 26

#__ type_ start__ end____ width___ exp.time_
 57 omega  136.00  172.00   1.0000    6.0000
omega____ theta____ kappa____ phi______ frames
    -      110.2342   77.0000  -60.0000 36

#__ type_ start__ end____ width___ exp.time_
 58 omega  142.00  175.00   1.0000    6.0000
omega____ theta____ kappa____ phi______ frames
    -      110.2342   77.0000  150.0000 33

#__ type_ start__ end____ width___ exp.time_
 59 omega   80.00  105.00   1.0000    6.0000
omega____ theta____ kappa____ phi______ frames
    -      110.2342   77.0000  -60.0000 25

#__ type_ start__ end____ width___ exp.time_
 60 omega  109.00  176.00   1.0000    6.0000
omega____ theta____ kappa____ phi______ frames
    -      110.2342   77.0000  120.0000 67

#__ type_ start__ end____ width___ exp.time_
 61 omega   80.00  106.00   1.0000    6.0000
omega____ theta____ kappa____ phi______ frames
    -      110.2342   77.0000  120.0000 26

#__ type_ start__ end____ width___ exp.time_
 62 omega   88.00  143.00   1.0000    6.0000
omega____ theta____ kappa____ phi______ frames
    -      110.2342   63.0000 -150.0000 55

#__ type_ start__ end____ width___ exp.time_
 63 omega   74.00  142.00   1.0000    6.0000
omega____ theta____ kappa____ phi______ frames
    -      110.2342  -80.0000   50.0000 68

#__ type_ start__ end____ width___ exp.time_
 64 omega   71.00  109.00   1.0000    6.0000
omega____ theta____ kappa____ phi______ frames
    -      110.2342  -80.0000  116.0000 38

#__ type_ start__ end____ width___ exp.time_
 65 omega   41.00   68.00   1.0000    6.0000
omega____ theta____ kappa____ phi______ frames
    -      110.2342  -80.0000  116.0000 27

#__ type_ start__ end____ width___ exp.time_
 66 omega   92.00  118.00   1.0000    6.0000
omega____ theta____ kappa____ phi______ frames
    -      110.2342   50.0000   60.0000 26

#__ type_ start__ end____ width___ exp.time_
 67 omega  117.00  142.00   1.0000    6.0000
omega____ theta____ kappa____ phi______ frames
    -      110.2342  -80.0000  163.0000 25

#__ type_ start__ end____ width___ exp.time_
 68 omega   77.00  103.00   1.0000    6.0000
omega____ theta____ kappa____ phi______ frames
    -      110.2342  -80.0000  163.0000 26

#__ type_ start__ end____ width___ exp.time_
 69 omega   94.00  121.00   1.0000    6.0000
omega____ theta____ kappa____ phi______ frames
    -      110.2342   50.0000  120.0000 27

#__ type_ start__ end____ width___ exp.time_
 70 omega   51.00  113.00   1.0000    6.0000
omega____ theta____ kappa____ phi______ frames
    -      110.2342  -80.0000   -6.0000 62

#__ type_ start__ end____ width___ exp.time_
 71 omega   88.00  114.00   1.0000    6.0000
omega____ theta____ kappa____ phi______ frames
    -      110.2342   63.0000    0.0000 26

#__ type_ start__ end____ width___ exp.time_
 72 omega   88.00  143.00   1.0000    6.0000
omega____ theta____ kappa____ phi______ frames
    -      110.2342   63.0000   30.0000 55

#__ type_ start__ end____ width___ exp.time_
 73 omega   88.00  154.00   1.0000    6.0000
omega____ theta____ kappa____ phi______ frames
    -      110.2342   63.0000  150.0000 66

#__ type_ start__ end____ width___ exp.time_
 74 omega   90.00  117.00   1.0000    6.0000
omega____ theta____ kappa____ phi______ frames
    -      110.2342   50.0000  -60.0000 27

#__ type_ start__ end____ width___ exp.time_
 75 omega   39.00  111.00   1.0000    6.0000
omega____ theta____ kappa____ phi______ frames
    -      110.2342  -80.0000 -138.0000 72

#__ type_ start__ end____ width___ exp.time_
 76 omega   88.00  177.00   1.0000    6.0000
omega____ theta____ kappa____ phi______ frames
    -      110.2342   63.0000 -120.0000 89

#__ type_ start__ end____ width___ exp.time_
 77 omega   88.00  148.00   1.0000    6.0000
omega____ theta____ kappa____ phi______ frames
    -      110.2342   63.0000  -90.0000 60

#__ type_ start__ end____ width___ exp.time_
 78 omega   85.00  111.00   1.0000    6.0000
omega____ theta____ kappa____ phi______ frames
    -      110.2342   38.0000    0.0000 26

#__ type_ start__ end____ width___ exp.time_
 79 omega   85.00  123.00   1.0000    6.0000
omega____ theta____ kappa____ phi______ frames
    -      110.2342   38.0000 -150.0000 38

#__ type_ start__ end____ width___ exp.time_
 80 omega   47.00  104.00   1.0000    6.0000
omega____ theta____ kappa____ phi______ frames
    -      110.2342  -80.0000  -53.0000 57

#__ type_ start__ end____ width___ exp.time_
 81 omega   80.00  178.00   1.0000    6.0000
omega____ theta____ kappa____ phi______ frames
    -      110.2342   77.0000  -30.0000 98

#__ type_ start__ end____ width___ exp.time_
 82 omega   85.00  111.00   1.0000    6.0000
omega____ theta____ kappa____ phi______ frames
    -      110.2342   38.0000  150.0000 26

#__ type_ start__ end____ width___ exp.time_
 83 omega   85.00  110.00   1.0000    6.0000
omega____ theta____ kappa____ phi______ frames
    -      110.2342   38.0000  120.0000 25

#__ type_ start__ end____ width___ exp.time_
 84 omega   86.00  166.00   1.0000    6.0000
omega____ theta____ kappa____ phi______ frames
    -      110.2342   38.0000  -30.0000 80

#__ type_ start__ end____ width___ exp.time_
 85 omega  -26.00   72.00   1.0000    1.5000
omega____ theta____ kappa____ phi______ frames
    -        0.0000   38.0000 -120.0000 98

#__ type_ start__ end____ width___ exp.time_
 86 omega  -26.00   72.00   1.0000    1.5000
omega____ theta____ kappa____ phi______ frames
    -        0.0000   38.0000   60.0000 98

#__ type_ start__ end____ width___ exp.time_
 87 omega  -26.00   72.00   1.0000    1.5000
omega____ theta____ kappa____ phi______ frames
    -        0.0000   38.0000  -30.0000 98

#__ type_ start__ end____ width___ exp.time_
 88 omega  -12.00   88.00   1.0000    1.5000
omega____ theta____ kappa____ phi______ frames
    -       18.0000   77.0000  134.0000 100

#__ type_ start__ end____ width___ exp.time_
 89 omega   -8.00   92.00   1.0000    1.5000
omega____ theta____ kappa____ phi______ frames
    -       22.0000   77.0000  -89.0000 100

#__ type_ start__ end____ width___ exp.time_
 90 omega   -8.00   92.00   1.0000    1.5000
omega____ theta____ kappa____ phi______ frames
    -       22.0000   77.0000 -151.0000 100

#__ type_ start__ end____ width___ exp.time_
 91 omega  -63.00   26.00   1.0000    3.0000
omega____ theta____ kappa____ phi______ frames
    -      -42.5000   57.0000   60.0000 89

#__ type_ start__ end____ width___ exp.time_
 92 omega   15.00   49.00   1.0000    3.0000
omega____ theta____ kappa____ phi______ frames
    -       46.0000   78.0000   76.0000 34

#__ type_ start__ end____ width___ exp.time_
 93 omega   15.00   47.00   1.0000    3.0000
omega____ theta____ kappa____ phi______ frames
    -       46.0000   79.0000   52.0000 32

#__ type_ start__ end____ width___ exp.time_
 94 omega   19.00   47.00   1.0000    3.0000
omega____ theta____ kappa____ phi______ frames
    -       50.0000   79.0000  146.0000 28

#__ type_ start__ end____ width___ exp.time_
 95 omega   19.00   49.00   1.0000    3.0000
omega____ theta____ kappa____ phi______ frames
    -       50.0000   78.0000  -95.0000 30

#__ type_ start__ end____ width___ exp.time_
 96 omega   19.00   47.00   1.0000    3.0000
omega____ theta____ kappa____ phi______ frames
    -       50.0000   79.0000  -13.0000 28

#__ type_ start__ end____ width___ exp.time_
 97 omega   19.00   49.00   1.0000    3.0000
omega____ theta____ kappa____ phi______ frames
    -       50.0000   78.0000  -61.0000 30

#__ type_ start__ end____ width___ exp.time_
 98 omega   19.00   47.00   1.0000    3.0000
omega____ theta____ kappa____ phi______ frames
    -       50.0000   79.0000 -158.0000 28

#__ type_ start__ end____ width___ exp.time_
 99 omega   19.00   47.00   1.0000    3.0000
omega____ theta____ kappa____ phi______ frames
    -       50.0000   79.0000  122.0000 28

#__ type_ start__ end____ width___ exp.time_
100 omega   18.00   46.00   1.0000    3.0000
omega____ theta____ kappa____ phi______ frames
    -       50.0000   80.0000 -145.0000 28

#__ type_ start__ end____ width___ exp.time_
101 omega   23.00   49.00   1.0000    3.0000
omega____ theta____ kappa____ phi______ frames
    -       54.0000   78.0000   14.0000 26

#__ type_ start__ end____ width___ exp.time_
102 omega   23.00   49.00   1.0000    3.0000
omega____ theta____ kappa____ phi______ frames
    -       54.0000   78.0000 -158.0000 26

#__ type_ start__ end____ width___ exp.time_
103 omega   23.00   49.00   1.0000    3.0000
omega____ theta____ kappa____ phi______ frames
    -       54.0000   78.0000 -109.0000 26

#__ type_ start__ end____ width___ exp.time_
104 omega  -18.00  128.00   1.0000    3.0000
omega____ theta____ kappa____ phi______ frames
    -       55.1171    0.0000  120.0000 146

#__ type_ start__ end____ width___ exp.time_
105 omega   29.00  128.00   1.0000    3.0000
omega____ theta____ kappa____ phi______ frames
    -       58.0000   76.0000  -25.0000 99

#__ type_ start__ end____ width___ exp.time_
106 omega   28.00  128.00   1.0000    3.0000
omega____ theta____ kappa____ phi______ frames
    -       58.0000   77.0000  105.0000 100

#__ type_ start__ end____ width___ exp.time_
107 omega   29.00  128.00   1.0000    3.0000
omega____ theta____ kappa____ phi______ frames
    -       58.0000   75.0000  -69.0000 99

#__ type_ start__ end____ width___ exp.time_
108 omega   30.00  127.00   1.0000    3.0000
omega____ theta____ kappa____ phi______ frames
    -       58.0000   73.0000   50.0000 97

#__ type_ start__ end____ width___ exp.time_
109 omega   29.00  128.00   1.0000    3.0000
omega____ theta____ kappa____ phi______ frames
    -       58.0000   76.0000   79.0000 99

#__ type_ start__ end____ width___ exp.time_
110 omega   32.00  132.00   1.0000    3.0000
omega____ theta____ kappa____ phi______ frames
    -       62.0000   77.0000 -164.0000 100

#__ type_ start__ end____ width___ exp.time_
111 omega   35.00  131.00   1.0000    3.0000
omega____ theta____ kappa____ phi______ frames
    -       62.0000   72.0000   -1.0000 96

#__ type_ start__ end____ width___ exp.time_
112 omega   33.00  132.00   1.0000    3.0000
omega____ theta____ kappa____ phi______ frames
    -       62.0000   76.0000  172.0000 99

#__ type_ start__ end____ width___ exp.time_
113 omega   35.00  131.00   1.0000    3.0000
omega____ theta____ kappa____ phi______ frames
    -       62.0000   71.0000  -91.0000 96

#__ type_ start__ end____ width___ exp.time_
114 omega   35.00  131.00   1.0000    3.0000
omega____ theta____ kappa____ phi______ frames
    -       62.0000   72.0000 -166.0000 96

#__ type_ start__ end____ width___ exp.time_
115 omega   -5.00   98.00   1.0000    3.0000
omega____ theta____ kappa____ phi______ frames
    -       66.0000  -80.0000  141.0000 103

#__ type_ start__ end____ width___ exp.time_
116 omega    3.00  106.00   1.0000    3.0000
omega____ theta____ kappa____ phi______ frames
    -       74.0000  -80.0000   88.0000 103

#__ type_ start__ end____ width___ exp.time_
117 omega    7.00  110.00   1.0000    3.0000
omega____ theta____ kappa____ phi______ frames
    -       78.0000  -80.0000  -20.0000 103

#__ type_ start__ end____ width___ exp.time_
118 omega    7.00  109.00   1.0000    3.0000
omega____ theta____ kappa____ phi______ frames
    -       78.0000  -79.0000 -123.0000 102

#__ type_ start__ end____ width___ exp.time_
119 omega   11.00  113.00   1.0000    3.0000
omega____ theta____ kappa____ phi______ frames
    -       82.0000  -79.0000   74.0000 102

#__ type_ start__ end____ width___ exp.time_
120 omega   11.00  113.00   1.0000    3.0000
omega____ theta____ kappa____ phi______ frames
    -       82.0000  -79.0000 -160.0000 102

#__ type_ start__ end____ width___ exp.time_
121 omega   88.00  178.00   1.0000    6.0000
omega____ theta____ kappa____ phi______ frames
    -      110.2342   50.0000  -90.0000 90

#__ type_ start__ end____ width___ exp.time_
122 omega   85.00  178.00   1.0000    6.0000
omega____ theta____ kappa____ phi______ frames
    -      110.2342   38.0000 -180.0000 93

#__ type_ start__ end____ width___ exp.time_
123 omega   88.00  178.00   1.0000    6.0000
omega____ theta____ kappa____ phi______ frames
    -      110.2342   50.0000   30.0000 90

#__ type_ start__ end____ width___ exp.time_
124 omega   76.00  178.00   1.0000    6.0000
omega____ theta____ kappa____ phi______ frames
    -      110.2342   25.0000  120.0000 102

#__ type_ start__ end____ width___ exp.time_
125 omega   37.00   94.00   1.0000    6.0000
omega____ theta____ kappa____ phi______ frames
    -      110.2342  -25.0000  150.0000 57

#__ type_ start__ end____ width___ exp.time_
126 omega   43.00  133.00   1.0000    6.0000
omega____ theta____ kappa____ phi______ frames
    -      110.2342  -63.0000    0.0000 90

#__ type_ start__ end____ width___ exp.time_
127 omega   40.00  140.00   1.0000    6.0000
omega____ theta____ kappa____ phi______ frames
    -      110.2342  -77.0000 -120.0000 100

#__ type_ start__ end____ width___ exp.time_
128 omega   37.00   94.00   1.0000    6.0000
omega____ theta____ kappa____ phi______ frames
    -      110.2342  -25.0000 -150.0000 57

#__ type_ start__ end____ width___ exp.time_
129 omega   37.00  178.00   1.0000    6.0000
omega____ theta____ kappa____ phi______ frames
    -      110.2342  -12.0000  -90.0000 141

#__ type_ start__ end____ width___ exp.time_
130 omega   80.00  178.00   1.0000    6.0000
omega____ theta____ kappa____ phi______ frames
    -      110.2342   77.0000  -30.0000 98

#__ type_ start__ end____ width___ exp.time_
131 omega   88.00  178.00   1.0000    6.0000
omega____ theta____ kappa____ phi______ frames
    -      110.2342   50.0000  -30.0000 90

;
_reflns_odcompleteness_completeness 99.96
_reflns_odcompleteness_theta     66.97
_reflns_odcompleteness_iscentric 1
_diffrn_measurement_device       '\k-geometry diffractometer'
_diffrn_detector                 'CCD plate'
_diffrn_detector_type            'Agilent EOS'
_diffrn_measurement_specimen_support 'polyimid foil'


#==end==


 
data_SS-12
_audit_creation_method           
;
CrysAlisPro, Oxford Diffraction Ltd.,
Version 1.171.35.19 (release 27-10-2011 CrysAlis171 .NET)
(compiled Oct 27 2011,15:02:11)
;
_audit_block_code                ga_ds46
_audit_block_refno               1357
_audit_update_record             'Fri Nov 11 10:23:41 CET 2011'


_chemical_name_systematic        ?
_chemical_name_common            ?
_chemical_formula_moiety         ?
_chemical_formula_sum            'C40 H37 N5 O2'
_chemical_melting_point          ?

_exptl_crystal_description       plate
_exptl_crystal_colour            yellow
_diffrn_ambient_temperature      119.96(19)
_chemical_formula_weight         619.75

loop_
_atom_type_symbol
_atom_type_description
_atom_type_scat_dispersion_real
_atom_type_scat_dispersion_imag
_atom_type_scat_source
C C 0.0181 0.0091 'International Tables Vol C Tables 4.2.6.8 and 6.1.1.4'
H H 0.0000 0.0000 'International Tables Vol C Tables 4.2.6.8 and 6.1.1.4'
N N 0.0311 0.0180 'International Tables Vol C Tables 4.2.6.8 and 6.1.1.4'
O O 0.0492 0.0322 'International Tables Vol C Tables 4.2.6.8 and 6.1.1.4'

_symmetry_cell_setting           monoclinic
_symmetry_space_group_name_H-M   'P 21'
_symmetry_int_tables_number      4
_chemical_absolute_configuration ad

loop_
_symmetry_equiv_pos_as_xyz
'x, y, z'
'-x, y+1/2, -z'

_cell_length_a                   18.41746(12)
_cell_length_b                   14.02800(9)
_cell_length_c                   25.77018(17)
_cell_angle_alpha                90.00
_cell_angle_beta                 102.0858(6)
_cell_angle_gamma                90.00
_cell_volume                     6510.41(7)
_cell_formula_units_Z            8
_cell_measurement_temperature    119.96(19)
_cell_measurement_reflns_used    116139
_cell_measurement_theta_min      3.5050
_cell_measurement_theta_max      71.9075
_exptl_crystal_size_max          0.24
_exptl_crystal_size_mid          0.21
_exptl_crystal_size_min          0.09
_exptl_crystal_density_meas      ?
_exptl_crystal_density_diffrn    1.265
_exptl_crystal_density_method    'not measured'
_exptl_crystal_F_000             2624
_exptl_absorpt_coefficient_mu    0.626
_exptl_absorpt_correction_type   multi-scan
_exptl_absorpt_correction_T_min  0.76431
_exptl_absorpt_correction_T_max  1.00000
_exptl_absorpt_process_details   
;
CrysAlisPro, Agilent Technologies,
Version 1.171.35.19 (release 27-10-2011 CrysAlis171 .NET)
(compiled Oct 27 2011,15:02:11)
Empirical absorption correction using spherical harmonics,
 implemented in SCALE3 ABSPACK scaling algorithm.
;

_exptl_special_details           
; 
 ? 
;
_diffrn_radiation_probe          x-ray
_diffrn_radiation_type           'Cu K\a'
_diffrn_radiation_wavelength     1.5418
_diffrn_source                   'Agilent SuperNova (Cu) X-ray Source'
_diffrn_radiation_monochromator  mirror
_diffrn_measurement_device_type  'Agilent SuperNova, Dual, Cu at zero, Eos'
_diffrn_measurement_method       '\w scans'
_diffrn_detector_area_resol_mean 15.9241
_diffrn_reflns_number            183894
_diffrn_reflns_av_R_equivalents  0.0404
_diffrn_reflns_av_sigmaI/netI    0.0705
_diffrn_reflns_limit_h_min       -22
_diffrn_reflns_limit_h_max       22
_diffrn_reflns_limit_k_min       -17
_diffrn_reflns_limit_k_max       17
_diffrn_reflns_limit_l_min       -31
_diffrn_reflns_limit_l_max       31
_diffrn_reflns_theta_min         3.5050
_diffrn_reflns_theta_max         71.9075
_reflns_number_total             25284
_reflns_number_gt                24575
_reflns_threshold_expression     >2sigma(I)
_computing_data_collection       
;
CrysAlisPro, Agilent Technologies,
Version 1.171.35.19 (release 27-10-2011 CrysAlis171 .NET)
(compiled Oct 27 2011,15:02:11)
;
_computing_cell_refinement       
;
CrysAlisPro, Agilent Technologies,
Version 1.171.35.19 (release 27-10-2011 CrysAlis171 .NET)
(compiled Oct 27 2011,15:02:11)
;
_computing_data_reduction        
;
CrysAlisPro, Agilent Technologies,
Version 1.171.35.19 (release 27-10-2011 CrysAlis171 .NET)
(compiled Oct 27 2011,15:02:11)
;
_computing_structure_solution    'SUPERFLIP (Palatinus, 2007-2009)'
_computing_structure_refinement  'SHELXL-97 (Sheldrick, 1997)'
_computing_molecular_graphics    ?
_computing_publication_material  'SHELXL-97 (Sheldrick, 1997)'

_refine_special_details          
; 
 Refinement of F^2^ against ALL reflections.  The weighted R-factor wR and 
 goodness of fit S are based on F^2^, conventional R-factors R are based 
 on F, with F set to zero for negative F^2^. The threshold expression of 
 F^2^ > 2sigma(F^2^) is used only for calculating R-factors(gt) etc. and is 
 not relevant to the choice of reflections for refinement.  R-factors based 
 on F^2^ are statistically about twice as large as those based on F, and R- 
 factors based on ALL data will be even larger. 
;

_refine_ls_structure_factor_coef Fsqd
_refine_ls_matrix_type           full
_refine_ls_weighting_scheme      calc
_refine_ls_weighting_details     
'calc w=1/[\s^2^(Fo^2^)+(0.0459P)^2^+1.0035P] where P=(Fo^2^+2Fc^2^)/3'
_atom_sites_solution_primary     dual
_atom_sites_solution_secondary   difmap
_atom_sites_solution_hydrogens   geom
_refine_ls_hydrogen_treatment    mixed
_refine_ls_extinction_method     none
_refine_ls_extinction_coef       ?
_refine_ls_abs_structure_details 'Flack H D (1983), Acta Cryst. A39, 876-881'
_refine_ls_abs_structure_Flack   0.04(7)
_refine_ls_number_reflns         25284
_refine_ls_number_parameters     1754
_refine_ls_number_restraints     51
_refine_ls_R_factor_all          0.0357
_refine_ls_R_factor_gt           0.0346
_refine_ls_wR_factor_ref         0.0778
_refine_ls_wR_factor_gt          0.0766
_refine_ls_goodness_of_fit_ref   1.007
_refine_ls_restrained_S_all      1.007
_refine_ls_shift/su_max          0.001
_refine_ls_shift/su_mean         0.000

loop_
_atom_site_label
_atom_site_type_symbol
_atom_site_fract_x
_atom_site_fract_y
_atom_site_fract_z
_atom_site_U_iso_or_equiv
_atom_site_adp_type
_atom_site_occupancy
_atom_site_symmetry_multiplicity
_atom_site_calc_flag
_atom_site_refinement_flags
_atom_site_disorder_assembly
_atom_site_disorder_group
O1 O 0.13868(5) 0.77871(6) 0.48281(3) 0.02103(18) Uani 1 1 d . . .
O2 O 0.26515(5) 0.51556(6) 0.49377(4) 0.02148(18) Uani 1 1 d . . .
N1 N 0.19202(6) 0.56563(8) 0.31480(4) 0.0192(2) Uani 1 1 d . . .
H1 H 0.2031(9) 0.5753(12) 0.3476(7) 0.023 Uiso 1 1 d . . .
N2 N 0.05745(6) 0.57756(9) 0.29732(4) 0.0247(2) Uani 1 1 d . . .
N3 N 0.10607(6) 0.62436(8) 0.38734(4) 0.0212(2) Uani 1 1 d . . .
N4 N 0.31543(6) 0.53669(8) 0.29780(4) 0.0208(2) Uani 1 1 d . . .
N5 N 0.31920(6) 0.54415(8) 0.39151(4) 0.0190(2) Uani 1 1 d . . .
C1 C 0.24508(7) 0.54954(9) 0.28432(5) 0.0190(2) Uani 1 1 d . . .
C2 C 0.20414(7) 0.54729(9) 0.22895(5) 0.0202(2) Uani 1 1 d . . .
C3 C 0.12904(7) 0.55720(10) 0.22837(5) 0.0218(3) Uani 1 1 d . . .
C4 C 0.12057(7) 0.56939(9) 0.28382(5) 0.0209(2) Uani 1 1 d . . .
C5 C 0.23028(7) 0.53700(10) 0.18255(5) 0.0234(3) Uani 1 1 d . . .
H5 H 0.2819 0.5307 0.1833 0.028 Uiso 1 1 calc R . .
C6 C 0.17865(8) 0.53629(11) 0.13505(5) 0.0280(3) Uani 1 1 d . . .
H6 H 0.1949 0.5299 0.1026 0.034 Uiso 1 1 calc R . .
C7 C 0.10320(8) 0.54483(11) 0.13442(6) 0.0301(3) Uani 1 1 d . . .
H7 H 0.0687 0.5433 0.1014 0.036 Uiso 1 1 calc R . .
C8 C 0.07709(7) 0.55550(11) 0.18087(5) 0.0280(3) Uani 1 1 d . . .
H8 H 0.0255 0.5614 0.1801 0.034 Uiso 1 1 calc R . .
C9 C 0.05067(7) 0.58773(10) 0.35042(5) 0.0226(3) Uani 1 1 d . . .
C10 C -0.01766(7) 0.55930(10) 0.36154(5) 0.0252(3) Uani 1 1 d . . .
H10E H -0.0558 0.5363 0.3336 0.030 Uiso 1 1 calc R . .
C11 C -0.03036(7) 0.56425(10) 0.41273(5) 0.0248(3) Uani 1 1 d . . .
C12 C 0.02732(7) 0.60123(9) 0.45107(5) 0.0216(3) Uani 1 1 d . . .
C13 C 0.09180(7) 0.63179(9) 0.43635(5) 0.0199(2) Uani 1 1 d . . .
C14 C 0.03247(7) 0.61241(10) 0.50976(5) 0.0232(3) Uani 1 1 d . . .
H14A H 0.0194 0.5523 0.5258 0.028 Uiso 1 1 calc R . .
H14B H -0.0006 0.6639 0.5173 0.028 Uiso 1 1 calc R . .
C15 C 0.11474(7) 0.63816(10) 0.53066(5) 0.0242(3) Uani 1 1 d . . .
H15E H 0.1194 0.6874 0.5587 0.029 Uiso 1 1 calc R . .
H15F H 0.1431 0.5811 0.5458 0.029 Uiso 1 1 calc R . .
C16 C 0.14451(7) 0.67606(9) 0.48329(5) 0.0205(3) Uani 1 1 d . . .
H16I H 0.1968 0.6550 0.4850 0.025 Uiso 1 1 calc R . .
C17 C -0.10141(8) 0.53201(12) 0.42708(6) 0.0326(3) Uani 1 1 d . . .
H17F H -0.1267 0.5869 0.4388 0.049 Uiso 1 1 calc R . .
H17G H -0.0903 0.4851 0.4558 0.049 Uiso 1 1 calc R . .
H17H H -0.1336 0.5029 0.3960 0.049 Uiso 1 1 calc R . .
C18 C 0.17279(8) 0.82081(10) 0.44342(6) 0.0280(3) Uani 1 1 d . . .
H18J H 0.1419 0.8090 0.4077 0.034 Uiso 1 1 calc R . .
H18K H 0.2223 0.7920 0.4450 0.034 Uiso 1 1 calc R . .
C19 C 0.18065(7) 0.92641(10) 0.45339(5) 0.0223(3) Uani 1 1 d . . .
C20 C 0.12972(7) 0.98990(11) 0.42476(6) 0.0281(3) Uani 1 1 d . . .
H20 H 0.0886 0.9663 0.3994 0.034 Uiso 1 1 calc R . .
C21 C 0.13822(8) 1.08759(11) 0.43270(6) 0.0315(3) Uani 1 1 d . . .
H21 H 0.1030 1.1303 0.4129 0.038 Uiso 1 1 calc R . .
C22 C 0.19786(8) 1.12260(10) 0.46936(6) 0.0295(3) Uani 1 1 d . . .
H22 H 0.2037 1.1894 0.4749 0.035 Uiso 1 1 calc R . .
C23 C 0.24934(8) 1.05987(11) 0.49818(5) 0.0253(3) Uani 1 1 d . . .
H23 H 0.2907 1.0837 0.5232 0.030 Uiso 1 1 calc R . .
C24 C 0.24035(7) 0.96258(10) 0.49042(5) 0.0233(3) Uani 1 1 d . . .
H24 H 0.2753 0.9200 0.5106 0.028 Uiso 1 1 calc R . .
C25 C 0.35416(7) 0.53395(9) 0.35058(5) 0.0195(2) Uani 1 1 d . . .
C26 C 0.43089(7) 0.51941(9) 0.35779(5) 0.0216(3) Uani 1 1 d . . .
H26 H 0.4526 0.5126 0.3277 0.026 Uiso 1 1 calc R . .
C27 C 0.47546(7) 0.51489(9) 0.40815(5) 0.0212(3) Uani 1 1 d . . .
C28 C 0.43923(7) 0.52123(9) 0.45037(5) 0.0194(2) Uani 1 1 d . . .
C29 C 0.36277(7) 0.53650(9) 0.43959(5) 0.0190(2) Uani 1 1 d . . .
C30 C 0.47045(7) 0.51774(9) 0.50903(5) 0.0220(3) Uani 1 1 d . . .
H30A H 0.5002 0.5755 0.5211 0.026 Uiso 1 1 calc R . .
H30B H 0.5021 0.4607 0.5186 0.026 Uiso 1 1 calc R . .
C31 C 0.40098(7) 0.51304(10) 0.53349(5) 0.0250(3) Uani 1 1 d . . .
H31A H 0.4080 0.5525 0.5660 0.030 Uiso 1 1 calc R . .
H31B H 0.3910 0.4465 0.5427 0.030 Uiso 1 1 calc R . .
C32 C 0.33628(7) 0.55191(9) 0.49081(5) 0.0206(2) Uani 1 1 d . . .
H32 H 0.3346 0.6224 0.4963 0.025 Uiso 1 1 calc R . .
C33 C 0.55849(7) 0.50567(10) 0.41641(6) 0.0271(3) Uani 1 1 d . . .
H33A H 0.5712 0.4735 0.3858 0.041 Uiso 1 1 calc R . .
H33B H 0.5772 0.4683 0.4485 0.041 Uiso 1 1 calc R . .
H33C H 0.5811 0.5692 0.4203 0.041 Uiso 1 1 calc R . .
C34 C 0.24895(7) 0.42074(10) 0.47460(6) 0.0249(3) Uani 1 1 d . . .
H34A H 0.2910 0.3777 0.4890 0.030 Uiso 1 1 calc R . .
H34B H 0.2402 0.4194 0.4354 0.030 Uiso 1 1 calc R . .
C35 C 0.18052(7) 0.38971(9) 0.49288(6) 0.0239(3) Uani 1 1 d . . .
C36 C 0.11173(8) 0.38493(10) 0.45866(7) 0.0317(3) Uani 1 1 d . . .
H36 H 0.1068 0.4010 0.4223 0.038 Uiso 1 1 calc R . .
C37 C 0.04963(9) 0.35625(12) 0.47801(8) 0.0439(4) Uani 1 1 d . . .
H37 H 0.0025 0.3522 0.4545 0.053 Uiso 1 1 calc R . .
C38 C 0.05633(10) 0.33375(11) 0.53111(8) 0.0453(4) Uani 1 1 d . . .
H38 H 0.0139 0.3147 0.5441 0.054 Uiso 1 1 calc R . .
C39 C 0.12446(11) 0.33907(12) 0.56478(8) 0.0443(4) Uani 1 1 d . . .
H39 H 0.1293 0.3233 0.6012 0.053 Uiso 1 1 calc R . .
C40 C 0.18597(9) 0.36716(11) 0.54607(6) 0.0343(3) Uani 1 1 d . . .
H40 H 0.2328 0.3712 0.5699 0.041 Uiso 1 1 calc R . .
O51 O 0.65189(5) 1.01675(6) 0.28406(3) 0.02122(18) Uani 1 1 d . . .
O52 O 0.44864(6) 0.69674(7) 0.20358(4) 0.0286(2) Uani 1 1 d . . .
N51 N 0.50294(6) 0.77113(8) 0.39768(4) 0.0211(2) Uani 1 1 d . . .
H51 H 0.5003(9) 0.7804(12) 0.3649(7) 0.025 Uiso 1 1 d . . .
N52 N 0.63426(6) 0.74817(8) 0.43127(4) 0.0213(2) Uani 1 1 d . . .
N53 N 0.61836(6) 0.83153(8) 0.34960(4) 0.0213(2) Uani 1 1 d . . .
N54 N 0.37091(6) 0.77955(8) 0.39416(4) 0.0226(2) Uani 1 1 d . . .
N55 N 0.40207(6) 0.78505(8) 0.30808(4) 0.0237(2) Uani 1 1 d . . .
C51 C 0.43926(7) 0.77373(9) 0.41838(5) 0.0211(3) Uani 1 1 d . . .
C52 C 0.46548(7) 0.76651(9) 0.47645(5) 0.0205(3) Uani 1 1 d . . .
C53 C 0.54243(7) 0.75557(9) 0.48715(5) 0.0205(3) Uani 1 1 d . . .
C54 C 0.56673(7) 0.75845(9) 0.43608(5) 0.0200(2) Uani 1 1 d . . .
C55 C 0.42701(7) 0.76988(9) 0.51749(5) 0.0227(3) Uani 1 1 d . . .
H55 H 0.3746 0.7777 0.5104 0.027 Uiso 1 1 calc R . .
C57 C 0.54483(8) 0.75017(10) 0.57962(5) 0.0255(3) Uani 1 1 d . . .
H57 H 0.5714 0.7444 0.6153 0.031 Uiso 1 1 calc R . .
C58 C 0.58336(8) 0.74719(9) 0.53858(5) 0.0233(3) Uani 1 1 d . . .
H58 H 0.6358 0.7397 0.5456 0.028 Uiso 1 1 calc R . .
C59 C 0.65267(7) 0.76199(9) 0.38138(5) 0.0208(3) Uani 1 1 d . . .
C60 C 0.71061(8) 0.70792(10) 0.36959(6) 0.0268(3) Uani 1 1 d . . .
H60 H 0.7326 0.6591 0.3933 0.032 Uiso 1 1 calc R . .
C61 C 0.73652(8) 0.72466(11) 0.32341(6) 0.0282(3) Uani 1 1 d . . .
C62 C 0.70182(8) 0.79785(10) 0.29098(5) 0.0257(3) Uani 1 1 d . . .
C63 C 0.64452(7) 0.84797(9) 0.30588(5) 0.0217(3) Uani 1 1 d . . .
C64 C 0.71608(9) 0.83465(11) 0.23927(6) 0.0314(3) Uani 1 1 d . . .
H64A H 0.7211 0.7817 0.2149 0.038 Uiso 1 1 calc R . .
H64B H 0.7615 0.8744 0.2449 0.038 Uiso 1 1 calc R . .
C65 C 0.64620(9) 0.89449(11) 0.21781(6) 0.0292(3) Uani 1 1 d . . .
H65A H 0.6586 0.9502 0.1977 0.035 Uiso 1 1 calc R . .
H65B H 0.6083 0.8557 0.1940 0.035 Uiso 1 1 calc R . .
C66 C 0.61729(7) 0.92713(10) 0.26650(5) 0.0228(3) Uani 1 1 d . . .
H66 H 0.5619 0.9322 0.2586 0.027 Uiso 1 1 calc R . .
C67 C 0.79939(10) 0.66822(13) 0.30974(7) 0.0434(4) Uani 1 1 d . . .
H67A H 0.8296 0.6410 0.3422 0.065 Uiso 1 1 calc R . .
H67B H 0.8302 0.7102 0.2929 0.065 Uiso 1 1 calc R . .
H67C H 0.7793 0.6167 0.2852 0.065 Uiso 1 1 calc R . .
C68 C 0.62639(9) 1.05171(11) 0.32923(6) 0.0332(3) Uani 1 1 d . . .
H68A H 0.6474 1.0121 0.3606 0.040 Uiso 1 1 calc R . .
H68B H 0.5716 1.0466 0.3227 0.040 Uiso 1 1 calc R . .
C69 C 0.64897(7) 1.15366(10) 0.34042(5) 0.0244(3) Uani 1 1 d . . .
C70 C 0.70448(8) 1.17568(11) 0.38409(6) 0.0272(3) Uani 1 1 d . . .
H70 H 0.7294 1.1259 0.4057 0.033 Uiso 1 1 calc R . .
C71 C 0.72404(8) 1.27055(11) 0.39648(6) 0.0290(3) Uani 1 1 d . . .
H71 H 0.7624 1.2852 0.4263 0.035 Uiso 1 1 calc R . .
C72 C 0.68742(8) 1.34283(10) 0.36524(6) 0.0291(3) Uani 1 1 d . . .
H72 H 0.7003 1.4074 0.3737 0.035 Uiso 1 1 calc R . .
C73 C 0.63191(9) 1.32153(11) 0.32161(6) 0.0296(3) Uani 1 1 d . . .
H73 H 0.6069 1.3714 0.3001 0.036 Uiso 1 1 calc R . .
C74 C 0.61283(8) 1.22728(11) 0.30939(5) 0.0274(3) Uani 1 1 d . . .
H74 H 0.5746 1.2130 0.2795 0.033 Uiso 1 1 calc R . .
C75 C 0.35055(8) 0.78315(9) 0.33853(5) 0.0234(3) Uani 1 1 d . . .
C76 C 0.27436(8) 0.78563(10) 0.31663(6) 0.0272(3) Uani 1 1 d . . .
H76 H 0.2400 0.7833 0.3394 0.033 Uiso 1 1 calc R . .
C77 C 0.24814(8) 0.79142(10) 0.26214(6) 0.0293(3) Uani 1 1 d . . .
C78 C 0.30154(9) 0.79389(10) 0.23091(6) 0.0288(3) Uani 1 1 d . . .
C79 C 0.37589(8) 0.78940(9) 0.25585(5) 0.0252(3) Uani 1 1 d . . .
C80 C 0.29296(10) 0.80165(11) 0.17176(6) 0.0352(3) Uani 1 1 d . . .
H80A H 0.2572 0.8525 0.1570 0.042 Uiso 1 1 calc R . .
H80B H 0.2761 0.7406 0.1540 0.042 Uiso 1 1 calc R . .
C81 C 0.37217(9) 0.82681(11) 0.16531(6) 0.0335(3) Uani 1 1 d . . .
H81A H 0.3831 0.7956 0.1333 0.040 Uiso 1 1 calc R . .
H81B H 0.3774 0.8966 0.1617 0.040 Uiso 1 1 calc R . .
C82 C 0.42497(8) 0.79056(10) 0.21531(5) 0.0274(3) Uani 1 1 d . . .
H82 H 0.4683 0.8344 0.2264 0.033 Uiso 1 1 calc R . .
C83 C 0.16665(9) 0.79850(12) 0.23794(7) 0.0388(4) Uani 1 1 d . . .
H83A H 0.1379 0.7855 0.2651 0.058 Uiso 1 1 calc R . .
H83B H 0.1537 0.7518 0.2092 0.058 Uiso 1 1 calc R . .
H83C H 0.1552 0.8628 0.2237 0.058 Uiso 1 1 calc R . .
C84 C 0.50042(9) 0.65514(11) 0.24633(6) 0.0328(3) Uani 1 1 d . . .
H84A H 0.4756 0.6396 0.2758 0.039 Uiso 1 1 calc R . .
H84B H 0.5412 0.7005 0.2596 0.039 Uiso 1 1 calc R . .
C85 C 0.53096(8) 0.56589(11) 0.22660(5) 0.0274(3) Uani 1 1 d . . .
C86 C 0.60579(9) 0.55767(13) 0.22678(7) 0.0389(4) Uani 1 1 d . . .
H86 H 0.6382 0.6090 0.2397 0.047 Uiso 1 1 calc R . .
C87 C 0.63428(9) 0.47582(15) 0.20841(7) 0.0450(4) Uani 1 1 d . . .
H87 H 0.6860 0.4709 0.2093 0.054 Uiso 1 1 calc R . .
C88 C 0.58762(9) 0.40165(12) 0.18888(6) 0.0347(3) Uani 1 1 d . . .
H88 H 0.6070 0.3455 0.1762 0.042 Uiso 1 1 calc R . .
C89 C 0.51264(9) 0.40911(11) 0.18783(6) 0.0340(3) Uani 1 1 d . . .
H89 H 0.4801 0.3585 0.1739 0.041 Uiso 1 1 calc R . .
C90 C 0.48474(8) 0.49040(11) 0.20711(6) 0.0308(3) Uani 1 1 d . . .
H90 H 0.4332 0.4944 0.2070 0.037 Uiso 1 1 calc R . .
C56 C 0.46786(8) 0.76145(10) 0.56916(5) 0.0259(3) Uani 1 1 d . . .
H56 H 0.4429 0.7634 0.5979 0.031 Uiso 1 1 calc R . .
O101 O 0.35942(5) 0.31257(7) 0.06210(4) 0.0249(2) Uani 1 1 d . . .
O102 O 0.23013(5) -0.08577(7) 0.00566(4) 0.0260(2) Uani 1 1 d . . .
N101 N 0.31245(6) 0.06226(8) 0.19000(4) 0.0198(2) Uani 1 1 d . . .
H10 H 0.3097(9) 0.0739(12) 0.1573(7) 0.024 Uiso 1 1 d . . .
N102 N 0.44532(6) 0.08063(8) 0.22276(4) 0.0228(2) Uani 1 1 d . . .
N103 N 0.40618(6) 0.14046(8) 0.13451(4) 0.0213(2) Uani 1 1 d . . .
N104 N 0.18206(6) 0.03804(8) 0.19024(4) 0.0215(2) Uani 1 1 d . . .
N105 N 0.20298(6) 0.03105(8) 0.10128(4) 0.0215(2) Uani 1 1 d . . .
C101 C 0.25118(7) 0.04657(9) 0.21230(5) 0.0192(2) Uani 1 1 d . . .
C102 C 0.28005(7) 0.04027(9) 0.27000(5) 0.0206(2) Uani 1 1 d . . .
C103 C 0.35712(7) 0.04737(9) 0.27925(5) 0.0213(3) Uani 1 1 d . . .
C104 C 0.37828(7) 0.06495(9) 0.22788(5) 0.0209(3) Uani 1 1 d . . .
C105 C 0.24330(7) 0.02949(10) 0.31121(5) 0.0237(3) Uani 1 1 d . . .
H10A H 0.1907 0.0253 0.3048 0.028 Uiso 1 1 calc R . .
C106 C 0.28609(8) 0.02501(10) 0.36241(5) 0.0264(3) Uani 1 1 d . . .
H10B H 0.2623 0.0181 0.3915 0.032 Uiso 1 1 calc R . .
C107 C 0.36293(8) 0.03048(10) 0.37168(5) 0.0277(3) Uani 1 1 d . . .
H10C H 0.3909 0.0260 0.4070 0.033 Uiso 1 1 calc R . .
C108 C 0.39990(8) 0.04244(10) 0.33027(5) 0.0265(3) Uani 1 1 d . . .
H10D H 0.4525 0.0471 0.3367 0.032 Uiso 1 1 calc R . .
C109 C 0.46122(7) 0.11125(9) 0.17437(5) 0.0213(3) Uani 1 1 d . . .
C110 C 0.53648(7) 0.11544(10) 0.17143(5) 0.0226(3) Uani 1 1 d . . .
H11 H 0.5735 0.0948 0.2007 0.027 Uiso 1 1 calc R . .
C111 C 0.55712(7) 0.14962(10) 0.12590(6) 0.0237(3) Uani 1 1 d . . .
C112 C 0.50007(7) 0.17953(9) 0.08481(5) 0.0220(3) Uani 1 1 d . . .
C113 C 0.42763(7) 0.17456(9) 0.09189(5) 0.0206(2) Uani 1 1 d . . .
C114 C 0.50277(8) 0.22013(10) 0.03126(6) 0.0263(3) Uani 1 1 d . . .
H11A H 0.5334 0.1799 0.0126 0.032 Uiso 1 1 calc R . .
H11B H 0.5230 0.2858 0.0344 0.032 Uiso 1 1 calc R . .
C115 C 0.42035(8) 0.21924(10) 0.00208(5) 0.0260(3) Uani 1 1 d . . .
H11C H 0.4086 0.2766 -0.0205 0.031 Uiso 1 1 calc R . .
H11D H 0.4095 0.1619 -0.0206 0.031 Uiso 1 1 calc R . .
C116 C 0.37453(7) 0.21834(9) 0.04553(5) 0.0222(3) Uani 1 1 d . . .
H11E H 0.3281 0.1798 0.0349 0.027 Uiso 1 1 calc R . .
C117 C 0.63717(8) 0.15466(12) 0.12113(7) 0.0343(3) Uani 1 1 d . . .
H11F H 0.6693 0.1390 0.1554 0.051 Uiso 1 1 calc R . .
H11G H 0.6484 0.2192 0.1106 0.051 Uiso 1 1 calc R . .
H11H H 0.6458 0.1090 0.0943 0.051 Uiso 1 1 calc R . .
C118 C 0.29506(7) 0.35321(10) 0.02964(6) 0.0270(3) Uani 1 1 d . . .
H11I H 0.2501 0.3272 0.0399 0.032 Uiso 1 1 calc R . .
H11J H 0.2931 0.3366 -0.0080 0.032 Uiso 1 1 calc R . .
C119 C 0.29689(7) 0.45979(10) 0.03604(5) 0.0223(3) Uani 1 1 d . . .
C120 C 0.34732(7) 0.50392(10) 0.07650(5) 0.0250(3) Uani 1 1 d . . .
H12 H 0.3821 0.4666 0.1006 0.030 Uiso 1 1 calc R . .
C121 C 0.34720(8) 0.60254(11) 0.08195(6) 0.0311(3) Uani 1 1 d . . .
H12A H 0.3818 0.6324 0.1098 0.037 Uiso 1 1 calc R . .
C122 C 0.29670(9) 0.65745(11) 0.04684(6) 0.0341(3) Uani 1 1 d . . .
H12B H 0.2967 0.7248 0.0506 0.041 Uiso 1 1 calc R . .
C123 C 0.24642(9) 0.61413(11) 0.00644(6) 0.0327(3) Uani 1 1 d . . .
H12C H 0.2118 0.6517 -0.0176 0.039 Uiso 1 1 calc R . .
C124 C 0.24651(8) 0.51559(11) 0.00102(5) 0.0276(3) Uani 1 1 d . . .
H12D H 0.2119 0.4860 -0.0268 0.033 Uiso 1 1 calc R . .
C125 C 0.15606(7) 0.03772(9) 0.13498(5) 0.0214(3) Uani 1 1 d . . .
C126 C 0.07880(7) 0.04018(10) 0.11745(6) 0.0254(3) Uani 1 1 d . . .
H12E H 0.0481 0.0435 0.1428 0.030 Uiso 1 1 calc R . .
C127 C 0.04614(7) 0.03785(10) 0.06381(6) 0.0268(3) Uani 1 1 d . . .
C128 C 0.09473(8) 0.03308(10) 0.02926(6) 0.0267(3) Uani 1 1 d . . .
C129 C 0.17041(7) 0.02838(9) 0.04966(5) 0.0228(3) Uani 1 1 d . . .
C130 C 0.07816(9) 0.03084(11) -0.03025(6) 0.0336(3) Uani 1 1 d . . .
H13A H 0.0439 0.0830 -0.0452 0.040 Uiso 1 1 calc R . .
H13B H 0.0560 -0.0309 -0.0438 0.040 Uiso 1 1 calc R . .
C131 C 0.15496(10) 0.04458(12) -0.04385(6) 0.0362(3) Uani 1 1 d . . .
H13C H 0.1624 0.1121 -0.0526 0.043 Uiso 1 1 calc R . .
H13D H 0.1595 0.0047 -0.0747 0.043 Uiso 1 1 calc R . .
C132 C 0.21274(8) 0.01413(10) 0.00561(5) 0.0266(3) Uani 1 1 d . . .
H13 H 0.2584 0.0546 0.0109 0.032 Uiso 1 1 calc R . .
C133 C -0.03660(8) 0.03734(11) 0.04426(7) 0.0362(4) Uani 1 1 d . . .
H13E H -0.0523 -0.0251 0.0289 0.054 Uiso 1 1 calc R . .
H13F H -0.0506 0.0868 0.0171 0.054 Uiso 1 1 calc R . .
H13G H -0.0608 0.0500 0.0740 0.054 Uiso 1 1 calc R . .
C134 C 0.27300(8) -0.11054(11) -0.03256(6) 0.0284(3) Uani 1 1 d . . .
H13H H 0.2485 -0.0840 -0.0674 0.034 Uiso 1 1 calc R . .
H13I H 0.2735 -0.1808 -0.0360 0.034 Uiso 1 1 calc R . .
C135 C 0.35227(8) -0.07497(10) -0.01888(6) 0.0258(3) Uani 1 1 d . . .
C136 C 0.39221(9) -0.07435(11) 0.03326(6) 0.0318(3) Uani 1 1 d . . .
H13J H 0.3684 -0.0915 0.0612 0.038 Uiso 1 1 calc R . .
C137 C 0.46648(9) -0.04892(12) 0.04470(7) 0.0379(4) Uani 1 1 d . . .
H13K H 0.4934 -0.0490 0.0804 0.045 Uiso 1 1 calc R . .
C138 C 0.50188(9) -0.02329(11) 0.00409(8) 0.0389(4) Uani 1 1 d . . .
H13L H 0.5531 -0.0071 0.0119 0.047 Uiso 1 1 calc R . .
C139 C 0.46227(9) -0.02147(12) -0.04744(7) 0.0377(4) Uani 1 1 d . . .
H13M H 0.4859 -0.0027 -0.0752 0.045 Uiso 1 1 calc R . .
C140 C 0.38782(9) -0.04704(11) -0.05902(6) 0.0305(3) Uani 1 1 d . . .
H14 H 0.3609 -0.0454 -0.0947 0.037 Uiso 1 1 calc R . .
O151 O 1.09248(5) 0.19156(7) 0.29872(4) 0.0268(2) Uani 1 1 d . . .
O152 O 0.83359(6) 0.49086(7) 0.22743(4) 0.0311(2) Uani 1 1 d . . .
N151 N 1.01190(6) 0.28272(8) 0.10669(5) 0.0218(2) Uani 1 1 d . . .
H15 H 1.0189(9) 0.2860(12) 0.1398(7) 0.026 Uiso 1 1 d . . .
N152 N 1.14164(6) 0.28792(8) 0.10168(5) 0.0241(2) Uani 1 1 d . . .
N153 N 1.12339(6) 0.28768(8) 0.19131(4) 0.0233(2) Uani 1 1 d . . .
N154 N 0.87966(6) 0.26040(8) 0.07941(4) 0.0231(2) Uani 1 1 d . . .
N155 N 0.88039(6) 0.33179(9) 0.16217(5) 0.0251(2) Uani 1 1 d . . .
C151 C 0.94453(7) 0.27557(9) 0.07104(5) 0.0210(3) Uani 1 1 d . . .
C152 C 0.96230(7) 0.28056(9) 0.01780(5) 0.0224(3) Uani 1 1 d . . .
C153 C 1.03917(7) 0.28351(9) 0.02421(5) 0.0228(3) Uani 1 1 d . . .
C154 C 1.07195(7) 0.28531(9) 0.08168(5) 0.0217(3) Uani 1 1 d . . .
C155 C 0.91527(8) 0.28053(10) -0.03184(5) 0.0272(3) Uani 1 1 d . . .
H15A H 0.8628 0.2798 -0.0357 0.033 Uiso 1 1 calc R . .
C156 C 0.94832(8) 0.28159(11) -0.07566(6) 0.0303(3) Uani 1 1 d . . .
H15B H 0.9180 0.2818 -0.1104 0.036 Uiso 1 1 calc R . .
C157 C 1.02552(9) 0.28234(11) -0.06938(6) 0.0319(3) Uani 1 1 d . . .
H15C H 1.0466 0.2819 -0.1000 0.038 Uiso 1 1 calc R . .
C158 C 1.07218(8) 0.28369(10) -0.01965(6) 0.0270(3) Uani 1 1 d . . .
H15D H 1.1246 0.2847 -0.0157 0.032 Uiso 1 1 calc R . .
C159 C 1.16968(7) 0.28859(9) 0.15682(5) 0.0236(3) Uani 1 1 d . . .
C160 C 1.24698(8) 0.29111(10) 0.17365(6) 0.0260(3) Uani 1 1 d . . .
H16 H 1.2773 0.2909 0.1480 0.031 Uiso 1 1 calc R . .
C161 C 1.28010(8) 0.29389(10) 0.22718(6) 0.0275(3) Uani 1 1 d . . .
C162 C 1.23234(8) 0.29251(10) 0.26252(6) 0.0263(3) Uani 1 1 d . . .
C163 C 1.15651(8) 0.28885(9) 0.24281(5) 0.0241(3) Uani 1 1 d . . .
C164 C 1.24986(9) 0.29485(11) 0.32219(6) 0.0318(3) Uani 1 1 d . . .
H16A H 1.2866 0.3452 0.3358 0.038 Uiso 1 1 calc R . .
H16B H 1.2692 0.2326 0.3372 0.038 Uiso 1 1 calc R . .
C165 C 1.17352(9) 0.31726(11) 0.33564(6) 0.0324(3) Uani 1 1 d . . .
H16C H 1.1676 0.2819 0.3677 0.039 Uiso 1 1 calc R . .
H16D H 1.1691 0.3863 0.3423 0.039 Uiso 1 1 calc R . .
C166 C 1.11442(8) 0.28606(10) 0.28754(5) 0.0269(3) Uani 1 1 d . . .
H16E H 1.0711 0.3307 0.2808 0.032 Uiso 1 1 calc R . .
C167 C 1.36280(8) 0.30112(11) 0.24646(7) 0.0345(3) Uani 1 1 d . . .
H16F H 1.3874 0.2911 0.2166 0.052 Uiso 1 1 calc R . .
H16G H 1.3795 0.2525 0.2736 0.052 Uiso 1 1 calc R . .
H16H H 1.3755 0.3645 0.2616 0.052 Uiso 1 1 calc R . .
C168 C 1.03879(8) 0.15024(11) 0.25728(6) 0.0299(3) Uani 1 1 d . . .
H16J H 1.0617 0.1336 0.2270 0.036 Uiso 1 1 calc R . .
H16K H 0.9978 0.1958 0.2448 0.036 Uiso 1 1 calc R . .
C169 C 1.00954(7) 0.06198(11) 0.27902(6) 0.0293(3) Uani 1 1 d . . .
C170 C 0.97072(8) 0.06814(12) 0.31980(6) 0.0329(3) Uani 1 1 d . . .
H17 H 0.9629 0.1287 0.3342 0.039 Uiso 1 1 calc R . .
C171 C 0.94339(8) -0.01333(13) 0.33960(6) 0.0384(4) Uani 1 1 d . . .
H17A H 0.9162 -0.0083 0.3670 0.046 Uiso 1 1 calc R . .
C172 C 0.95573(10) -0.10170(14) 0.31949(7) 0.0467(4) Uani 1 1 d . . .
H17B H 0.9369 -0.1575 0.3328 0.056 Uiso 1 1 calc R . .
C173 C 0.99569(12) -0.10850(14) 0.27982(8) 0.0536(5) Uani 1 1 d . . .
H17C H 1.0048 -0.1693 0.2662 0.064 Uiso 1 1 calc R . .
C174 C 1.02247(10) -0.02701(13) 0.25975(7) 0.0432(4) Uani 1 1 d . . .
H17D H 1.0499 -0.0324 0.2325 0.052 Uiso 1 1 calc R . .
C175 C 0.86882(7) 0.25383(10) 0.13189(5) 0.0218(3) Uani 1 1 d . . .
C176 C 0.84201(7) 0.16807(10) 0.14826(5) 0.0238(3) Uani 1 1 d . . .
H17E H 0.8349 0.1150 0.1249 0.029 Uiso 1 1 calc R . .
C177 C 0.82567(7) 0.15963(10) 0.19824(6) 0.0244(3) Uani 1 1 d . . .
C178 C 0.83456(7) 0.24223(10) 0.22921(5) 0.0241(3) Uani 1 1 d . . .
C179 C 0.86159(7) 0.32362(10) 0.20964(5) 0.0246(3) Uani 1 1 d . . .
C180 C 0.81854(8) 0.25928(11) 0.28345(6) 0.0299(3) Uani 1 1 d . . .
H18A H 0.8543 0.2247 0.3111 0.036 Uiso 1 1 calc R . .
H18B H 0.7675 0.2387 0.2848 0.036 Uiso 1 1 calc R . .
C181 C 0.82718(13) 0.36670(13) 0.29092(8) 0.0539(5) Uani 1 1 d . . .
H18C H 0.8556 0.3813 0.3271 0.065 Uiso 1 1 calc R . .
H18D H 0.7778 0.3973 0.2863 0.065 Uiso 1 1 calc R . .
C182 C 0.86864(9) 0.40466(11) 0.24921(6) 0.0326(3) Uani 1 1 d . . .
H18 H 0.9220 0.4165 0.2657 0.039 Uiso 1 1 calc R . .
C183 C 0.80003(8) 0.06722(11) 0.21766(6) 0.0324(3) Uani 1 1 d . . .
H18E H 0.7829 0.0246 0.1874 0.049 Uiso 1 1 calc R . .
H18F H 0.7591 0.0795 0.2357 0.049 Uiso 1 1 calc R . .
H18G H 0.8413 0.0372 0.2425 0.049 Uiso 1 1 calc R . .
C184 C 0.88047(6) 0.54751(8) 0.20272(4) 0.0286(3) Uani 1 1 d . A .
H18H H 0.8986 0.5088 0.1759 0.034 Uiso 1 1 calc R . .
H18I H 0.9241 0.5684 0.2297 0.034 Uiso 1 1 calc R . .
C91 C 0.84015(6) 0.63298(8) 0.17652(4) 0.0349(3) Uani 1 1 d R . .
C92A C 0.75648(6) 0.61054(8) 0.15084(4) 0.0375(19) Uani 0.349(9) 1 d PRDU A 1
H92A H 0.7355 0.5494 0.1537 0.045 Uiso 0.349(9) 1 calc PR A 1
C93A C 0.7151(5) 0.6847(8) 0.1239(3) 0.051(2) Uani 0.349(9) 1 d PDU A 1
H93A H 0.6639 0.6749 0.1090 0.061 Uiso 0.349(9) 1 calc PR A 1
C94A C 0.7468(7) 0.7735(8) 0.1180(4) 0.051(2) Uani 0.349(9) 1 d PDU A 1
H94A H 0.7183 0.8227 0.0982 0.061 Uiso 0.349(9) 1 calc PR A 1
C95A C 0.8204(6) 0.7885(8) 0.1416(4) 0.046(2) Uani 0.349(9) 1 d PDU A 1
H95A H 0.8431 0.8484 0.1384 0.056 Uiso 0.349(9) 1 calc PR A 1
C96A C 0.8608(5) 0.7154(7) 0.1700(5) 0.037(2) Uani 0.349(9) 1 d PDU A 1
H96A H 0.9106 0.7302 0.1866 0.044 Uiso 0.349(9) 1 calc PR A 1
C92B C 0.7745(2) 0.6335(3) 0.14472(14) 0.0424(12) Uani 0.651(9) 1 d PDU A 2
H92B H 0.7472 0.5756 0.1393 0.051 Uiso 0.651(9) 1 calc PR A 2
C93B C 0.7429(4) 0.7153(5) 0.11850(17) 0.0550(15) Uani 0.651(9) 1 d PDU A 2
H93B H 0.6952 0.7125 0.0957 0.066 Uiso 0.651(9) 1 calc PR A 2
C94B C 0.7818(5) 0.8012(5) 0.1260(2) 0.0571(18) Uani 0.651(9) 1 d PDU A 2
H94B H 0.7616 0.8570 0.1076 0.069 Uiso 0.651(9) 1 calc PR A 2
C95B C 0.8498(4) 0.8039(3) 0.1603(3) 0.0542(14) Uani 0.651(9) 1 d PDU A 2
H95B H 0.8753 0.8629 0.1670 0.065 Uiso 0.651(9) 1 calc PR A 2
C96B C 0.8815(3) 0.7225(4) 0.1852(3) 0.0353(10) Uani 0.651(9) 1 d PDU A 2
H96B H 0.9294 0.7246 0.2077 0.042 Uiso 0.651(9) 1 calc PR A 2

loop_
_atom_site_aniso_label
_atom_site_aniso_U_11
_atom_site_aniso_U_22
_atom_site_aniso_U_33
_atom_site_aniso_U_23
_atom_site_aniso_U_13
_atom_site_aniso_U_12
O1 0.0228(4) 0.0175(4) 0.0244(5) -0.0016(4) 0.0087(3) -0.0008(3)
O2 0.0217(4) 0.0183(4) 0.0261(5) -0.0011(4) 0.0088(4) -0.0004(3)
N1 0.0178(5) 0.0219(5) 0.0179(5) -0.0012(4) 0.0040(4) -0.0006(4)
N2 0.0197(5) 0.0310(6) 0.0237(6) -0.0044(5) 0.0052(4) -0.0002(5)
N3 0.0185(5) 0.0228(6) 0.0227(5) -0.0026(4) 0.0055(4) 0.0012(4)
N4 0.0201(5) 0.0205(5) 0.0227(5) 0.0013(4) 0.0065(4) 0.0003(4)
N5 0.0182(5) 0.0178(5) 0.0212(5) 0.0005(4) 0.0045(4) -0.0002(4)
C1 0.0214(6) 0.0165(6) 0.0201(6) 0.0010(5) 0.0066(5) -0.0015(5)
C2 0.0218(6) 0.0160(6) 0.0230(6) 0.0009(5) 0.0047(5) -0.0001(5)
C3 0.0219(6) 0.0211(6) 0.0226(6) -0.0009(5) 0.0051(5) -0.0007(5)
C4 0.0205(6) 0.0193(6) 0.0227(6) -0.0007(5) 0.0043(5) -0.0023(5)
C5 0.0210(6) 0.0262(7) 0.0243(6) 0.0007(5) 0.0073(5) 0.0030(5)
C6 0.0327(7) 0.0310(7) 0.0218(6) 0.0012(6) 0.0091(5) 0.0037(6)
C7 0.0275(7) 0.0389(8) 0.0218(6) -0.0013(6) 0.0002(5) 0.0035(6)
C8 0.0208(6) 0.0368(8) 0.0256(7) -0.0018(6) 0.0027(5) 0.0003(6)
C9 0.0192(6) 0.0247(7) 0.0238(7) -0.0019(5) 0.0045(5) 0.0026(5)
C10 0.0173(6) 0.0315(7) 0.0265(7) -0.0068(6) 0.0034(5) -0.0018(5)
C11 0.0197(6) 0.0273(7) 0.0287(7) -0.0042(6) 0.0076(5) 0.0007(5)
C12 0.0206(6) 0.0196(6) 0.0252(7) -0.0011(5) 0.0063(5) 0.0028(5)
C13 0.0186(6) 0.0165(6) 0.0245(6) -0.0007(5) 0.0044(5) 0.0028(5)
C14 0.0258(6) 0.0212(6) 0.0235(7) -0.0011(5) 0.0077(5) -0.0003(5)
C15 0.0282(7) 0.0217(6) 0.0220(6) -0.0011(5) 0.0039(5) -0.0012(5)
C16 0.0206(6) 0.0168(6) 0.0240(6) -0.0020(5) 0.0043(5) 0.0012(5)
C17 0.0224(6) 0.0461(9) 0.0310(7) -0.0076(7) 0.0092(6) -0.0074(6)
C18 0.0349(7) 0.0240(7) 0.0291(7) -0.0052(6) 0.0158(6) -0.0064(6)
C19 0.0238(6) 0.0225(6) 0.0231(6) -0.0003(5) 0.0104(5) -0.0013(5)
C20 0.0210(6) 0.0352(8) 0.0267(7) -0.0002(6) 0.0021(5) -0.0010(6)
C21 0.0304(7) 0.0297(8) 0.0358(8) 0.0080(6) 0.0102(6) 0.0097(6)
C22 0.0371(8) 0.0205(7) 0.0357(8) -0.0017(6) 0.0182(6) 0.0000(6)
C23 0.0249(6) 0.0295(7) 0.0225(6) -0.0048(6) 0.0071(5) -0.0047(5)
C24 0.0246(6) 0.0249(7) 0.0209(6) 0.0024(5) 0.0059(5) 0.0035(5)
C25 0.0196(6) 0.0171(6) 0.0219(6) 0.0006(5) 0.0047(5) -0.0014(5)
C26 0.0202(6) 0.0188(6) 0.0273(7) -0.0007(5) 0.0085(5) -0.0010(5)
C27 0.0182(6) 0.0150(6) 0.0305(7) -0.0004(5) 0.0052(5) -0.0004(5)
C28 0.0185(6) 0.0139(6) 0.0244(6) -0.0005(5) 0.0018(5) -0.0012(5)
C29 0.0194(6) 0.0138(6) 0.0241(6) 0.0012(5) 0.0052(5) -0.0016(5)
C30 0.0211(6) 0.0172(6) 0.0256(7) 0.0004(5) 0.0002(5) 0.0004(5)
C31 0.0264(6) 0.0255(7) 0.0217(6) 0.0024(5) 0.0019(5) -0.0009(5)
C32 0.0214(6) 0.0186(6) 0.0218(6) -0.0004(5) 0.0047(5) -0.0011(5)
C33 0.0177(6) 0.0263(7) 0.0372(8) -0.0009(6) 0.0053(5) 0.0006(5)
C34 0.0249(6) 0.0210(6) 0.0310(7) -0.0046(5) 0.0108(5) -0.0025(5)
C35 0.0260(7) 0.0154(6) 0.0326(7) -0.0011(5) 0.0115(6) 0.0014(5)
C36 0.0288(7) 0.0217(7) 0.0444(9) -0.0029(6) 0.0074(6) -0.0001(6)
C37 0.0275(7) 0.0274(8) 0.0773(13) -0.0085(8) 0.0121(8) -0.0037(6)
C38 0.0479(10) 0.0223(8) 0.0787(13) -0.0010(8) 0.0432(10) -0.0020(7)
C39 0.0593(11) 0.0326(9) 0.0512(10) 0.0079(8) 0.0346(9) 0.0054(8)
C40 0.0393(8) 0.0295(8) 0.0376(8) 0.0038(7) 0.0159(7) 0.0058(6)
O51 0.0236(4) 0.0209(4) 0.0211(4) 0.0003(4) 0.0091(3) -0.0017(4)
O52 0.0403(6) 0.0225(5) 0.0220(5) -0.0016(4) 0.0039(4) 0.0018(4)
N51 0.0247(5) 0.0225(6) 0.0169(5) 0.0001(4) 0.0064(4) -0.0007(4)
N52 0.0255(5) 0.0182(5) 0.0218(5) 0.0012(4) 0.0081(4) 0.0003(4)
N53 0.0229(5) 0.0205(5) 0.0215(5) 0.0012(4) 0.0073(4) -0.0011(4)
N54 0.0246(5) 0.0183(5) 0.0252(6) -0.0003(4) 0.0063(4) -0.0002(4)
N55 0.0292(6) 0.0186(5) 0.0229(6) -0.0013(4) 0.0047(4) -0.0005(4)
C51 0.0274(6) 0.0139(6) 0.0240(6) -0.0003(5) 0.0098(5) -0.0012(5)
C52 0.0267(6) 0.0131(6) 0.0230(6) -0.0008(5) 0.0081(5) -0.0016(5)
C53 0.0275(6) 0.0144(6) 0.0217(6) -0.0002(5) 0.0096(5) -0.0025(5)
C54 0.0269(6) 0.0141(6) 0.0198(6) -0.0002(5) 0.0065(5) -0.0018(5)
C55 0.0271(7) 0.0165(6) 0.0272(7) -0.0013(5) 0.0123(5) -0.0020(5)
C57 0.0379(8) 0.0196(6) 0.0199(6) -0.0002(5) 0.0079(6) -0.0038(5)
C58 0.0266(7) 0.0198(6) 0.0242(7) 0.0008(5) 0.0067(5) -0.0022(5)
C59 0.0237(6) 0.0200(6) 0.0202(6) -0.0009(5) 0.0077(5) -0.0019(5)
C60 0.0323(7) 0.0232(7) 0.0270(7) 0.0033(6) 0.0109(6) 0.0058(5)
C61 0.0332(7) 0.0266(7) 0.0281(7) -0.0019(6) 0.0141(6) 0.0043(6)
C62 0.0322(7) 0.0237(7) 0.0242(7) -0.0017(5) 0.0128(5) -0.0020(5)
C63 0.0232(6) 0.0209(6) 0.0217(6) -0.0020(5) 0.0066(5) -0.0027(5)
C64 0.0452(8) 0.0267(7) 0.0284(7) -0.0003(6) 0.0218(6) 0.0003(6)
C65 0.0433(8) 0.0254(7) 0.0207(7) -0.0006(5) 0.0108(6) -0.0059(6)
C66 0.0265(6) 0.0208(6) 0.0213(6) 0.0022(5) 0.0056(5) -0.0032(5)
C67 0.0551(10) 0.0409(9) 0.0419(9) 0.0064(7) 0.0276(8) 0.0200(8)
C68 0.0432(8) 0.0288(8) 0.0353(8) -0.0060(6) 0.0259(7) -0.0065(6)
C69 0.0269(7) 0.0250(7) 0.0252(7) -0.0015(5) 0.0143(5) -0.0006(5)
C70 0.0266(7) 0.0289(7) 0.0276(7) 0.0030(6) 0.0090(6) 0.0074(6)
C71 0.0229(6) 0.0360(8) 0.0287(7) -0.0070(6) 0.0069(5) -0.0001(6)
C72 0.0339(7) 0.0246(7) 0.0341(7) -0.0049(6) 0.0195(6) -0.0013(6)
C73 0.0396(8) 0.0280(7) 0.0249(7) 0.0056(6) 0.0148(6) 0.0096(6)
C74 0.0289(7) 0.0348(8) 0.0192(6) -0.0016(6) 0.0064(5) 0.0026(6)
C75 0.0282(6) 0.0151(6) 0.0268(7) 0.0005(5) 0.0057(5) 0.0006(5)
C76 0.0278(7) 0.0185(6) 0.0346(8) 0.0005(6) 0.0049(6) 0.0005(5)
C77 0.0302(7) 0.0157(6) 0.0381(8) 0.0014(6) -0.0016(6) 0.0013(5)
C78 0.0402(8) 0.0149(6) 0.0280(7) -0.0011(5) -0.0005(6) 0.0005(6)
C79 0.0342(7) 0.0152(6) 0.0251(7) -0.0008(5) 0.0041(5) -0.0014(5)
C80 0.0516(9) 0.0221(7) 0.0263(7) -0.0008(6) -0.0045(7) 0.0034(6)
C81 0.0567(10) 0.0199(7) 0.0226(7) 0.0003(6) 0.0058(6) 0.0034(6)
C82 0.0419(8) 0.0187(6) 0.0215(6) -0.0015(5) 0.0065(6) -0.0016(6)
C83 0.0335(8) 0.0288(8) 0.0473(9) 0.0058(7) -0.0072(7) -0.0010(6)
C84 0.0438(8) 0.0300(8) 0.0223(7) -0.0010(6) 0.0016(6) 0.0032(6)
C85 0.0358(7) 0.0267(7) 0.0189(6) 0.0021(5) 0.0038(5) -0.0016(6)
C86 0.0349(8) 0.0412(9) 0.0426(9) -0.0071(7) 0.0124(7) -0.0123(7)
C87 0.0311(8) 0.0580(11) 0.0493(10) -0.0074(9) 0.0165(7) -0.0014(8)
C88 0.0441(9) 0.0326(8) 0.0295(8) 0.0019(6) 0.0129(7) 0.0077(7)
C89 0.0396(8) 0.0281(8) 0.0329(8) -0.0015(6) 0.0045(6) -0.0017(6)
C90 0.0272(7) 0.0315(8) 0.0321(8) -0.0001(6) 0.0027(6) -0.0007(6)
C56 0.0374(7) 0.0198(6) 0.0248(7) -0.0012(5) 0.0167(6) -0.0023(5)
O101 0.0232(4) 0.0208(5) 0.0276(5) -0.0025(4) -0.0020(4) 0.0040(4)
O102 0.0318(5) 0.0224(5) 0.0259(5) -0.0017(4) 0.0109(4) -0.0016(4)
N101 0.0191(5) 0.0231(6) 0.0170(5) -0.0003(4) 0.0032(4) -0.0007(4)
N102 0.0198(5) 0.0247(6) 0.0237(5) 0.0007(5) 0.0045(4) 0.0011(4)
N103 0.0191(5) 0.0211(5) 0.0238(5) 0.0014(4) 0.0050(4) 0.0002(4)
N104 0.0226(5) 0.0206(5) 0.0218(5) -0.0020(4) 0.0053(4) 0.0000(4)
N105 0.0215(5) 0.0218(5) 0.0205(5) -0.0006(4) 0.0032(4) -0.0002(4)
C101 0.0219(6) 0.0160(6) 0.0206(6) -0.0009(5) 0.0066(5) 0.0009(5)
C102 0.0251(6) 0.0155(6) 0.0212(6) -0.0013(5) 0.0049(5) -0.0015(5)
C103 0.0234(6) 0.0181(6) 0.0225(6) -0.0004(5) 0.0049(5) -0.0002(5)
C104 0.0219(6) 0.0178(6) 0.0223(6) -0.0008(5) 0.0029(5) 0.0016(5)
C105 0.0265(6) 0.0217(6) 0.0243(6) -0.0009(5) 0.0083(5) -0.0035(5)
C106 0.0373(7) 0.0234(7) 0.0206(6) 0.0000(5) 0.0108(5) -0.0040(6)
C107 0.0354(7) 0.0270(7) 0.0195(6) 0.0005(5) 0.0027(5) -0.0025(6)
C108 0.0237(6) 0.0296(7) 0.0251(7) 0.0003(6) 0.0023(5) -0.0008(5)
C109 0.0210(6) 0.0197(6) 0.0230(6) -0.0014(5) 0.0045(5) -0.0006(5)
C110 0.0192(6) 0.0226(6) 0.0245(7) -0.0007(5) 0.0008(5) 0.0011(5)
C111 0.0213(6) 0.0205(6) 0.0298(7) -0.0012(5) 0.0067(5) -0.0009(5)
C112 0.0240(6) 0.0160(6) 0.0269(7) -0.0012(5) 0.0075(5) -0.0006(5)
C113 0.0214(6) 0.0164(6) 0.0235(6) -0.0013(5) 0.0038(5) -0.0006(5)
C114 0.0264(7) 0.0246(7) 0.0295(7) 0.0048(6) 0.0092(6) 0.0003(5)
C115 0.0308(7) 0.0236(7) 0.0236(7) 0.0022(5) 0.0061(5) 0.0019(5)
C116 0.0233(6) 0.0180(6) 0.0244(7) -0.0008(5) 0.0028(5) -0.0016(5)
C117 0.0216(7) 0.0416(9) 0.0409(9) 0.0069(7) 0.0094(6) 0.0016(6)
C118 0.0230(6) 0.0260(7) 0.0290(7) -0.0019(6) -0.0014(5) 0.0021(5)
C119 0.0202(6) 0.0257(7) 0.0222(6) 0.0004(5) 0.0070(5) 0.0022(5)
C120 0.0232(6) 0.0270(7) 0.0238(7) 0.0005(6) 0.0023(5) 0.0041(5)
C121 0.0319(7) 0.0281(7) 0.0305(7) -0.0023(6) -0.0002(6) 0.0004(6)
C122 0.0437(8) 0.0237(7) 0.0333(8) -0.0007(6) 0.0044(7) 0.0046(6)
C123 0.0382(8) 0.0318(8) 0.0256(7) 0.0057(6) 0.0010(6) 0.0119(6)
C124 0.0254(6) 0.0333(8) 0.0220(7) -0.0020(6) 0.0005(5) 0.0044(6)
C125 0.0216(6) 0.0178(6) 0.0245(6) -0.0014(5) 0.0040(5) -0.0003(5)
C126 0.0209(6) 0.0228(7) 0.0325(7) -0.0061(6) 0.0058(5) 0.0001(5)
C127 0.0230(6) 0.0172(6) 0.0363(7) -0.0046(6) -0.0024(5) 0.0025(5)
C128 0.0307(7) 0.0170(6) 0.0282(7) -0.0032(5) -0.0035(5) 0.0013(5)
C129 0.0268(6) 0.0174(6) 0.0231(6) -0.0011(5) 0.0030(5) -0.0015(5)
C130 0.0456(9) 0.0221(7) 0.0260(7) -0.0012(6) -0.0085(6) 0.0024(6)
C131 0.0545(10) 0.0291(8) 0.0235(7) 0.0012(6) 0.0048(6) 0.0060(7)
C132 0.0370(7) 0.0215(7) 0.0212(6) -0.0025(5) 0.0057(6) -0.0030(6)
C133 0.0256(7) 0.0276(8) 0.0493(9) -0.0095(7) -0.0059(6) 0.0023(6)
C134 0.0328(7) 0.0293(7) 0.0246(7) -0.0053(6) 0.0093(6) -0.0023(6)
C135 0.0317(7) 0.0197(6) 0.0267(7) -0.0009(5) 0.0080(6) 0.0025(5)
C136 0.0413(8) 0.0288(7) 0.0250(7) -0.0002(6) 0.0062(6) -0.0015(6)
C137 0.0399(8) 0.0303(8) 0.0380(9) -0.0075(7) -0.0043(7) 0.0029(7)
C138 0.0298(7) 0.0265(7) 0.0604(11) -0.0103(7) 0.0098(7) 0.0006(6)
C139 0.0389(8) 0.0303(8) 0.0503(10) -0.0024(7) 0.0237(7) 0.0007(6)
C140 0.0374(8) 0.0267(7) 0.0296(7) 0.0009(6) 0.0119(6) 0.0050(6)
O151 0.0296(5) 0.0250(5) 0.0248(5) 0.0013(4) 0.0029(4) -0.0036(4)
O152 0.0306(5) 0.0260(5) 0.0421(6) -0.0068(4) 0.0198(4) -0.0043(4)
N151 0.0238(5) 0.0230(6) 0.0191(5) 0.0003(5) 0.0056(4) 0.0006(4)
N152 0.0243(5) 0.0227(6) 0.0262(6) -0.0003(5) 0.0074(4) -0.0010(4)
N153 0.0250(5) 0.0205(5) 0.0243(6) 0.0005(5) 0.0047(4) 0.0000(4)
N154 0.0235(5) 0.0233(6) 0.0229(5) -0.0027(5) 0.0058(4) -0.0003(4)
N155 0.0264(6) 0.0259(6) 0.0250(6) -0.0043(5) 0.0105(5) -0.0037(5)
C151 0.0257(6) 0.0161(6) 0.0212(6) -0.0006(5) 0.0046(5) 0.0015(5)
C152 0.0280(7) 0.0177(6) 0.0229(6) -0.0003(5) 0.0083(5) 0.0003(5)
C153 0.0289(7) 0.0165(6) 0.0240(7) -0.0005(5) 0.0076(5) -0.0008(5)
C154 0.0246(6) 0.0171(6) 0.0248(6) -0.0002(5) 0.0084(5) 0.0003(5)
C155 0.0310(7) 0.0256(7) 0.0245(7) -0.0011(6) 0.0044(5) 0.0002(6)
C156 0.0400(8) 0.0300(7) 0.0201(7) -0.0014(6) 0.0046(6) -0.0013(6)
C157 0.0457(9) 0.0294(8) 0.0249(7) -0.0021(6) 0.0171(6) -0.0036(7)
C158 0.0318(7) 0.0232(7) 0.0290(7) -0.0026(6) 0.0133(6) -0.0030(6)
C159 0.0258(6) 0.0181(6) 0.0270(7) -0.0003(5) 0.0058(5) 0.0002(5)
C160 0.0244(6) 0.0213(6) 0.0330(7) -0.0006(6) 0.0079(5) -0.0002(5)
C161 0.0258(7) 0.0172(6) 0.0373(8) 0.0000(6) 0.0015(6) -0.0009(5)
C162 0.0308(7) 0.0169(6) 0.0286(7) 0.0006(5) 0.0005(6) -0.0015(5)
C163 0.0289(7) 0.0170(6) 0.0261(7) 0.0004(5) 0.0048(5) 0.0001(5)
C164 0.0384(8) 0.0225(7) 0.0299(7) 0.0002(6) -0.0033(6) -0.0055(6)
C165 0.0493(9) 0.0234(7) 0.0232(7) 0.0000(6) 0.0042(6) -0.0064(6)
C166 0.0355(7) 0.0214(6) 0.0241(7) 0.0002(5) 0.0070(6) 0.0003(6)
C167 0.0263(7) 0.0286(8) 0.0451(9) -0.0033(7) -0.0003(6) -0.0024(6)
C168 0.0259(7) 0.0356(8) 0.0270(7) -0.0002(6) 0.0026(6) -0.0025(6)
C169 0.0194(6) 0.0382(8) 0.0291(7) -0.0017(6) 0.0027(5) -0.0050(6)
C170 0.0239(7) 0.0428(9) 0.0311(8) -0.0006(7) 0.0037(6) 0.0002(6)
C171 0.0272(7) 0.0552(11) 0.0339(8) 0.0030(7) 0.0086(6) -0.0066(7)
C172 0.0483(10) 0.0469(10) 0.0473(10) -0.0023(8) 0.0154(8) -0.0222(8)
C173 0.0679(13) 0.0393(10) 0.0618(12) -0.0122(9) 0.0322(10) -0.0195(9)
C174 0.0462(9) 0.0420(9) 0.0472(10) -0.0091(8) 0.0230(8) -0.0099(8)
C175 0.0145(5) 0.0276(7) 0.0235(6) -0.0013(5) 0.0047(5) 0.0006(5)
C176 0.0210(6) 0.0237(7) 0.0260(7) -0.0020(5) 0.0033(5) -0.0022(5)
C177 0.0168(6) 0.0280(7) 0.0279(7) 0.0019(6) 0.0038(5) -0.0008(5)
C178 0.0174(6) 0.0298(7) 0.0257(7) 0.0014(6) 0.0060(5) 0.0016(5)
C179 0.0195(6) 0.0276(7) 0.0281(7) -0.0032(6) 0.0084(5) -0.0003(5)
C180 0.0292(7) 0.0355(8) 0.0279(7) 0.0012(6) 0.0128(6) 0.0013(6)
C181 0.0903(15) 0.0373(10) 0.0479(10) -0.0066(8) 0.0461(11) -0.0070(10)
C182 0.0419(8) 0.0294(8) 0.0302(8) -0.0061(6) 0.0155(6) -0.0037(6)
C183 0.0325(7) 0.0324(8) 0.0320(7) 0.0051(6) 0.0057(6) -0.0063(6)
C184 0.0259(7) 0.0330(8) 0.0285(7) -0.0070(6) 0.0094(5) -0.0084(6)
C91 0.0472(9) 0.0380(9) 0.0227(7) -0.0058(6) 0.0146(6) 0.0015(7)
C92A 0.030(3) 0.046(4) 0.032(3) -0.013(2) -0.004(2) -0.008(3)
C93A 0.045(4) 0.084(6) 0.024(3) -0.004(3) 0.005(3) 0.006(4)
C94A 0.066(6) 0.062(7) 0.028(3) 0.009(4) 0.017(4) 0.023(5)
C95A 0.065(7) 0.050(5) 0.029(5) 0.018(4) 0.021(4) 0.007(5)
C96A 0.030(4) 0.046(4) 0.037(5) -0.008(3) 0.014(3) -0.007(3)
C92B 0.050(2) 0.0406(19) 0.0333(16) -0.0138(13) 0.0004(14) -0.0035(18)
C93B 0.065(3) 0.073(4) 0.0246(17) -0.003(2) 0.0045(19) 0.023(3)
C94B 0.097(5) 0.052(3) 0.032(3) 0.013(2) 0.035(4) 0.025(3)
C95B 0.075(3) 0.040(2) 0.065(4) 0.002(2) 0.053(3) 0.004(2)
C96B 0.037(3) 0.0328(16) 0.043(3) -0.0030(18) 0.0236(19) -0.0091(16)

_geom_special_details            
; 
 All esds (except the esd in the dihedral angle between two l.s. planes) 
 are estimated using the full covariance matrix.  The cell esds are taken 
 into account individually in the estimation of esds in distances, angles 
 and torsion angles; correlations between esds in cell parameters are only 
 used when they are defined by crystal symmetry.  An approximate (isotropic) 
 treatment of cell esds is used for estimating esds involving l.s. planes. 
;

loop_
_geom_bond_atom_site_label_1
_geom_bond_atom_site_label_2
_geom_bond_distance
_geom_bond_site_symmetry_2
_geom_bond_publ_flag
O1 C18 1.4287(16) . ?
O1 C16 1.4438(15) . ?
O2 C32 1.4227(15) . ?
O2 C34 1.4286(16) . ?
N1 C4 1.3899(16) . ?
N1 C1 1.3944(16) . ?
N1 H1 0.838(17) . ?
N2 C4 1.2864(17) . ?
N2 C9 1.4070(17) . ?
N3 C9 1.3432(17) . ?
N3 C13 1.3469(17) . ?
N4 C1 1.2820(16) . ?
N4 C25 1.3979(16) . ?
N5 C29 1.3319(16) . ?
N5 C25 1.3536(16) . ?
C1 C2 1.4680(17) . ?
C2 C5 1.3869(18) . ?
C2 C3 1.3871(18) . ?
C3 C8 1.3872(18) . ?
C3 C4 1.4796(18) . ?
C5 C6 1.3840(19) . ?
C5 H5 0.9500 . ?
C6 C7 1.391(2) . ?
C6 H6 0.9500 . ?
C7 C8 1.388(2) . ?
C7 H7 0.9500 . ?
C8 H8 0.9500 . ?
C9 C10 1.4057(18) . ?
C10 C11 1.3889(19) . ?
C10 H10E 0.9500 . ?
C11 C12 1.3907(19) . ?
C11 C17 1.5022(18) . ?
C12 C13 1.3881(18) . ?
C12 C14 1.5036(18) . ?
C13 C16 1.5163(18) . ?
C14 C15 1.5411(18) . ?
C14 H14A 0.9900 . ?
C14 H14B 0.9900 . ?
C15 C16 1.5342(18) . ?
C15 H15E 0.9900 . ?
C15 H15F 0.9900 . ?
C16 H16I 1.0000 . ?
C17 H17F 0.9800 . ?
C17 H17G 0.9800 . ?
C17 H17H 0.9800 . ?
C18 C19 1.5052(19) . ?
C18 H18J 0.9900 . ?
C18 H18K 0.9900 . ?
C19 C20 1.389(2) . ?
C19 C24 1.3920(19) . ?
C20 C21 1.390(2) . ?
C20 H20 0.9500 . ?
C21 C22 1.380(2) . ?
C21 H21 0.9500 . ?
C22 C23 1.389(2) . ?
C22 H22 0.9500 . ?
C23 C24 1.384(2) . ?
C23 H23 0.9500 . ?
C24 H24 0.9500 . ?
C25 C26 1.4011(17) . ?
C26 C27 1.3841(19) . ?
C26 H26 0.9500 . ?
C27 C28 1.3933(18) . ?
C27 C33 1.5047(17) . ?
C28 C29 1.3936(17) . ?
C28 C30 1.5013(18) . ?
C29 C32 1.5156(17) . ?
C30 C31 1.5416(18) . ?
C30 H30A 0.9900 . ?
C30 H30B 0.9900 . ?
C31 C32 1.5421(18) . ?
C31 H31A 0.9900 . ?
C31 H31B 0.9900 . ?
C32 H32 1.0000 . ?
C33 H33A 0.9800 . ?
C33 H33B 0.9800 . ?
C33 H33C 0.9800 . ?
C34 C35 1.4995(18) . ?
C34 H34A 0.9900 . ?
C34 H34B 0.9900 . ?
C35 C36 1.385(2) . ?
C35 C40 1.390(2) . ?
C36 C37 1.399(2) . ?
C36 H36 0.9500 . ?
C37 C38 1.384(3) . ?
C37 H37 0.9500 . ?
C38 C39 1.370(3) . ?
C38 H38 0.9500 . ?
C39 C40 1.378(2) . ?
C39 H39 0.9500 . ?
C40 H40 0.9500 . ?
O51 C68 1.4300(16) . ?
O51 C66 1.4390(16) . ?
O52 C84 1.4224(17) . ?
O52 C82 1.4383(17) . ?
N51 C54 1.3799(17) . ?
N51 C51 1.3869(16) . ?
N51 H51 0.846(17) . ?
N52 C54 1.2836(17) . ?
N52 C59 1.4099(16) . ?
N53 C63 1.3350(16) . ?
N53 C59 1.3435(17) . ?
N54 C51 1.2852(17) . ?
N54 C75 1.4049(17) . ?
N55 C79 1.3327(18) . ?
N55 C75 1.3522(18) . ?
C51 C52 1.4766(18) . ?
C52 C55 1.3917(18) . ?
C52 C53 1.3944(18) . ?
C53 C58 1.3858(19) . ?
C53 C54 1.4766(17) . ?
C55 C56 1.390(2) . ?
C55 H55 0.9500 . ?
C57 C58 1.3923(19) . ?
C57 C56 1.395(2) . ?
C57 H57 0.9500 . ?
C58 H58 0.9500 . ?
C59 C60 1.3937(19) . ?
C60 C61 1.3918(19) . ?
C60 H60 0.9500 . ?
C61 C62 1.392(2) . ?
C61 C67 1.504(2) . ?
C62 C63 1.3874(19) . ?
C62 C64 1.5027(19) . ?
C63 C66 1.5171(18) . ?
C64 C65 1.539(2) . ?
C64 H64A 0.9900 . ?
C64 H64B 0.9900 . ?
C65 C66 1.5321(19) . ?
C65 H65A 0.9900 . ?
C65 H65B 0.9900 . ?
C66 H66 1.0000 . ?
C67 H67A 0.9800 . ?
C67 H67B 0.9800 . ?
C67 H67C 0.9800 . ?
C68 C69 1.500(2) . ?
C68 H68A 0.9900 . ?
C68 H68B 0.9900 . ?
C69 C70 1.387(2) . ?
C69 C74 1.388(2) . ?
C70 C71 1.398(2) . ?
C70 H70 0.9500 . ?
C71 C72 1.380(2) . ?
C71 H71 0.9500 . ?
C72 C73 1.385(2) . ?
C72 H72 0.9500 . ?
C73 C74 1.387(2) . ?
C73 H73 0.9500 . ?
C74 H74 0.9500 . ?
C75 C76 1.3988(19) . ?
C76 C77 1.388(2) . ?
C76 H76 0.9500 . ?
C77 C78 1.396(2) . ?
C77 C83 1.503(2) . ?
C78 C79 1.387(2) . ?
C78 C80 1.503(2) . ?
C79 C82 1.518(2) . ?
C80 C81 1.543(2) . ?
C80 H80A 0.9900 . ?
C80 H80B 0.9900 . ?
C81 C82 1.530(2) . ?
C81 H81A 0.9900 . ?
C81 H81B 0.9900 . ?
C82 H82 1.0000 . ?
C83 H83A 0.9800 . ?
C83 H83B 0.9800 . ?
C83 H83C 0.9800 . ?
C84 C85 1.504(2) . ?
C84 H84A 0.9900 . ?
C84 H84B 0.9900 . ?
C85 C86 1.382(2) . ?
C85 C90 1.385(2) . ?
C86 C87 1.386(3) . ?
C86 H86 0.9500 . ?
C87 C88 1.376(3) . ?
C87 H87 0.9500 . ?
C88 C89 1.379(2) . ?
C88 H88 0.9500 . ?
C89 C90 1.385(2) . ?
C89 H89 0.9500 . ?
C90 H90 0.9500 . ?
C56 H56 0.9500 . ?
O101 C118 1.4192(15) . ?
O101 C116 1.4343(16) . ?
O102 C134 1.4282(16) . ?
O102 C132 1.4375(17) . ?
N101 C101 1.3870(16) . ?
N101 C104 1.3887(16) . ?
N101 H10 0.850(17) . ?
N102 C104 1.2877(17) . ?
N102 C109 1.4066(17) . ?
N103 C113 1.3314(17) . ?
N103 C109 1.3470(17) . ?
N104 C101 1.2864(16) . ?
N104 C125 1.4042(17) . ?
N105 C129 1.3404(17) . ?
N105 C125 1.3507(17) . ?
C101 C102 1.4732(17) . ?
C102 C105 1.3820(18) . ?
C102 C103 1.3928(18) . ?
C103 C108 1.3858(18) . ?
C103 C104 1.4770(18) . ?
C105 C106 1.3893(19) . ?
C105 H10A 0.9500 . ?
C106 C107 1.387(2) . ?
C106 H10B 0.9500 . ?
C107 C108 1.3911(19) . ?
C107 H10C 0.9500 . ?
C108 H10D 0.9500 . ?
C109 C110 1.4051(18) . ?
C110 C111 1.3921(19) . ?
C110 H11 0.9500 . ?
C111 C112 1.3912(19) . ?
C111 C117 1.5065(18) . ?
C112 C113 1.3856(18) . ?
C112 C114 1.5034(19) . ?
C113 C116 1.5072(18) . ?
C114 C115 1.5467(19) . ?
C114 H11A 0.9900 . ?
C114 H11B 0.9900 . ?
C115 C116 1.5368(18) . ?
C115 H11C 0.9900 . ?
C115 H11D 0.9900 . ?
C116 H11E 1.0000 . ?
C117 H11F 0.9800 . ?
C117 H11G 0.9800 . ?
C117 H11H 0.9800 . ?
C118 C119 1.504(2) . ?
C118 H11I 0.9900 . ?
C118 H11J 0.9900 . ?
C119 C120 1.3883(19) . ?
C119 C124 1.3920(19) . ?
C120 C121 1.391(2) . ?
C120 H12 0.9500 . ?
C121 C122 1.387(2) . ?
C121 H12A 0.9500 . ?
C122 C123 1.381(2) . ?
C122 H12B 0.9500 . ?
C123 C124 1.389(2) . ?
C123 H12C 0.9500 . ?
C124 H12D 0.9500 . ?
C125 C126 1.4003(18) . ?
C126 C127 1.388(2) . ?
C126 H12E 0.9500 . ?
C127 C128 1.390(2) . ?
C127 C133 1.5016(19) . ?
C128 C129 1.3844(19) . ?
C128 C130 1.500(2) . ?
C129 C132 1.5187(19) . ?
C130 C131 1.539(2) . ?
C130 H13A 0.9900 . ?
C130 H13B 0.9900 . ?
C131 C132 1.540(2) . ?
C131 H13C 0.9900 . ?
C131 H13D 0.9900 . ?
C132 H13 1.0000 . ?
C133 H13E 0.9800 . ?
C133 H13F 0.9800 . ?
C133 H13G 0.9800 . ?
C134 C135 1.5130(19) . ?
C134 H13H 0.9900 . ?
C134 H13I 0.9900 . ?
C135 C136 1.390(2) . ?
C135 C140 1.391(2) . ?
C136 C137 1.384(2) . ?
C136 H13J 0.9500 . ?
C137 C138 1.391(3) . ?
C137 H13K 0.9500 . ?
C138 C139 1.375(3) . ?
C138 H13L 0.9500 . ?
C139 C140 1.388(2) . ?
C139 H13M 0.9500 . ?
C140 H14 0.9500 . ?
O151 C168 1.4185(17) . ?
O151 C166 1.4326(17) . ?
O152 C184 1.4189(14) . ?
O152 C182 1.4290(19) . ?
N151 C151 1.3844(17) . ?
N151 C154 1.3923(16) . ?
N151 H15 0.838(17) . ?
N152 C154 1.2796(17) . ?
N152 C159 1.4065(18) . ?
N153 C163 1.3396(18) . ?
N153 C159 1.3545(17) . ?
N154 C151 1.2755(17) . ?
N154 C175 1.4109(17) . ?
N155 C175 1.3345(18) . ?
N155 C179 1.3442(17) . ?
C151 C152 1.4772(18) . ?
C152 C155 1.3865(19) . ?
C152 C153 1.3913(18) . ?
C153 C158 1.3909(19) . ?
C153 C154 1.4777(18) . ?
C155 C156 1.391(2) . ?
C155 H15A 0.9500 . ?
C156 C157 1.397(2) . ?
C156 H15B 0.9500 . ?
C157 C158 1.386(2) . ?
C157 H15C 0.9500 . ?
C158 H15D 0.9500 . ?
C159 C160 1.3991(18) . ?
C160 C161 1.387(2) . ?
C160 H16 0.9500 . ?
C161 C162 1.393(2) . ?
C161 C167 1.5034(19) . ?
C162 C163 1.3836(19) . ?
C162 C164 1.504(2) . ?
C163 C166 1.5184(19) . ?
C164 C165 1.549(2) . ?
C164 H16A 0.9900 . ?
C164 H16B 0.9900 . ?
C165 C166 1.532(2) . ?
C165 H16C 0.9900 . ?
C165 H16D 0.9900 . ?
C166 H16E 1.0000 . ?
C167 H16F 0.9800 . ?
C167 H16G 0.9800 . ?
C167 H16H 0.9800 . ?
C168 C169 1.504(2) . ?
C168 H16J 0.9900 . ?
C168 H16K 0.9900 . ?
C169 C174 1.382(2) . ?
C169 C170 1.392(2) . ?
C170 C171 1.388(2) . ?
C170 H17 0.9500 . ?
C171 C172 1.381(3) . ?
C171 H17A 0.9500 . ?
C172 C173 1.382(3) . ?
C172 H17B 0.9500 . ?
C173 C174 1.387(3) . ?
C173 H17C 0.9500 . ?
C174 H17D 0.9500 . ?
C175 C176 1.3987(19) . ?
C176 C177 1.3876(19) . ?
C176 H17E 0.9500 . ?
C177 C178 1.397(2) . ?
C177 C183 1.501(2) . ?
C178 C179 1.382(2) . ?
C178 C180 1.5071(19) . ?
C179 C182 1.5144(19) . ?
C180 C181 1.523(2) . ?
C180 H18A 0.9900 . ?
C180 H18B 0.9900 . ?
C181 C182 1.538(2) . ?
C181 H18C 0.9900 . ?
C181 H18D 0.9900 . ?
C182 H18 1.0000 . ?
C183 H18E 0.9800 . ?
C183 H18F 0.9800 . ?
C183 H18G 0.9800 . ?
C184 C91 1.4950 . ?
C184 H18H 0.9900 . ?
C184 H18I 0.9900 . ?
C91 C96A 1.239(10) . ?
C91 C92B 1.311(4) . ?
C91 C96B 1.461(5) . ?
C91 C92A 1.5762 . ?
C92A C93A 1.387(9) . ?
C92A H92A 0.9500 . ?
C93A C94A 1.398(11) . ?
C93A H93A 0.9500 . ?
C94A C95A 1.380(11) . ?
C94A H94A 0.9500 . ?
C95A C96A 1.383(11) . ?
C95A H95A 0.9500 . ?
C96A H96A 0.9500 . ?
C92B C93B 1.395(6) . ?
C92B H92B 0.9500 . ?
C93B C94B 1.395(8) . ?
C93B H93B 0.9500 . ?
C94B C95B 1.373(7) . ?
C94B H94B 0.9500 . ?
C95B C96B 1.378(7) . ?
C95B H95B 0.9500 . ?
C96B H96B 0.9500 . ?

loop_
_geom_angle_atom_site_label_1
_geom_angle_atom_site_label_2
_geom_angle_atom_site_label_3
_geom_angle
_geom_angle_site_symmetry_1
_geom_angle_site_symmetry_3
_geom_angle_publ_flag
C18 O1 C16 112.05(10) . . ?
C32 O2 C34 116.30(9) . . ?
C4 N1 C1 111.94(11) . . ?
C4 N1 H1 125.1(11) . . ?
C1 N1 H1 122.9(11) . . ?
C4 N2 C9 122.77(11) . . ?
C9 N3 C13 115.18(11) . . ?
C1 N4 C25 123.25(11) . . ?
C29 N5 C25 115.09(10) . . ?
N4 C1 N1 131.14(12) . . ?
N4 C1 C2 123.01(11) . . ?
N1 C1 C2 105.84(10) . . ?
C5 C2 C3 121.77(12) . . ?
C5 C2 C1 129.78(11) . . ?
C3 C2 C1 108.45(11) . . ?
C2 C3 C8 120.65(12) . . ?
C2 C3 C4 107.92(11) . . ?
C8 C3 C4 131.42(12) . . ?
N2 C4 N1 130.44(12) . . ?
N2 C4 C3 123.75(12) . . ?
N1 C4 C3 105.76(11) . . ?
C6 C5 C2 117.71(12) . . ?
C6 C5 H5 121.1 . . ?
C2 C5 H5 121.1 . . ?
C5 C6 C7 120.61(13) . . ?
C5 C6 H6 119.7 . . ?
C7 C6 H6 119.7 . . ?
C8 C7 C6 121.65(13) . . ?
C8 C7 H7 119.2 . . ?
C6 C7 H7 119.2 . . ?
C3 C8 C7 117.59(12) . . ?
C3 C8 H8 121.2 . . ?
C7 C8 H8 121.2 . . ?
N3 C9 C10 122.94(12) . . ?
N3 C9 N2 121.25(11) . . ?
C10 C9 N2 115.79(11) . . ?
C11 C10 C9 121.03(12) . . ?
C11 C10 H10E 119.5 . . ?
C9 C10 H10E 119.5 . . ?
C10 C11 C12 115.98(12) . . ?
C10 C11 C17 123.18(12) . . ?
C12 C11 C17 120.84(12) . . ?
C13 C12 C11 119.41(12) . . ?
C13 C12 C14 111.42(11) . . ?
C11 C12 C14 129.16(12) . . ?
N3 C13 C12 125.34(12) . . ?
N3 C13 C16 124.17(11) . . ?
C12 C13 C16 110.48(11) . . ?
C12 C14 C15 103.08(10) . . ?
C12 C14 H14A 111.1 . . ?
C15 C14 H14A 111.1 . . ?
C12 C14 H14B 111.1 . . ?
C15 C14 H14B 111.1 . . ?
H14A C14 H14B 109.1 . . ?
C16 C15 C14 106.99(11) . . ?
C16 C15 H15E 110.3 . . ?
C14 C15 H15E 110.3 . . ?
C16 C15 H15F 110.3 . . ?
C14 C15 H15F 110.3 . . ?
H15E C15 H15F 108.6 . . ?
O1 C16 C13 111.57(10) . . ?
O1 C16 C15 108.31(10) . . ?
C13 C16 C15 102.54(10) . . ?
O1 C16 H16I 111.4 . . ?
C13 C16 H16I 111.4 . . ?
C15 C16 H16I 111.4 . . ?
C11 C17 H17F 109.5 . . ?
C11 C17 H17G 109.5 . . ?
H17F C17 H17G 109.5 . . ?
C11 C17 H17H 109.5 . . ?
H17F C17 H17H 109.5 . . ?
H17G C17 H17H 109.5 . . ?
O1 C18 C19 109.05(11) . . ?
O1 C18 H18J 109.9 . . ?
C19 C18 H18J 109.9 . . ?
O1 C18 H18K 109.9 . . ?
C19 C18 H18K 109.9 . . ?
H18J C18 H18K 108.3 . . ?
C20 C19 C24 118.64(13) . . ?
C20 C19 C18 120.69(13) . . ?
C24 C19 C18 120.64(13) . . ?
C19 C20 C21 120.77(13) . . ?
C19 C20 H20 119.6 . . ?
C21 C20 H20 119.6 . . ?
C22 C21 C20 120.04(14) . . ?
C22 C21 H21 120.0 . . ?
C20 C21 H21 120.0 . . ?
C21 C22 C23 119.78(13) . . ?
C21 C22 H22 120.1 . . ?
C23 C22 H22 120.1 . . ?
C24 C23 C22 119.98(13) . . ?
C24 C23 H23 120.0 . . ?
C22 C23 H23 120.0 . . ?
C23 C24 C19 120.78(13) . . ?
C23 C24 H24 119.6 . . ?
C19 C24 H24 119.6 . . ?
N5 C25 N4 121.76(11) . . ?
N5 C25 C26 122.90(12) . . ?
N4 C25 C26 115.34(11) . . ?
C27 C26 C25 120.98(12) . . ?
C27 C26 H26 119.5 . . ?
C25 C26 H26 119.5 . . ?
C26 C27 C28 116.25(11) . . ?
C26 C27 C33 121.49(12) . . ?
C28 C27 C33 122.26(12) . . ?
C27 C28 C29 118.90(12) . . ?
C27 C28 C30 129.72(11) . . ?
C29 C28 C30 111.34(11) . . ?
N5 C29 C28 125.79(11) . . ?
N5 C29 C32 123.88(11) . . ?
C28 C29 C32 110.14(11) . . ?
C28 C30 C31 103.73(10) . . ?
C28 C30 H30A 111.0 . . ?
C31 C30 H30A 111.0 . . ?
C28 C30 H30B 111.0 . . ?
C31 C30 H30B 111.0 . . ?
H30A C30 H30B 109.0 . . ?
C30 C31 C32 106.07(10) . . ?
C30 C31 H31A 110.5 . . ?
C32 C31 H31A 110.5 . . ?
C30 C31 H31B 110.5 . . ?
C32 C31 H31B 110.5 . . ?
H31A C31 H31B 108.7 . . ?
O2 C32 C29 117.61(10) . . ?
O2 C32 C31 114.70(10) . . ?
C29 C32 C31 103.25(10) . . ?
O2 C32 H32 106.9 . . ?
C29 C32 H32 106.9 . . ?
C31 C32 H32 106.9 . . ?
C27 C33 H33A 109.5 . . ?
C27 C33 H33B 109.5 . . ?
H33A C33 H33B 109.5 . . ?
C27 C33 H33C 109.5 . . ?
H33A C33 H33C 109.5 . . ?
H33B C33 H33C 109.5 . . ?
O2 C34 C35 106.86(10) . . ?
O2 C34 H34A 110.3 . . ?
C35 C34 H34A 110.4 . . ?
O2 C34 H34B 110.4 . . ?
C35 C34 H34B 110.4 . . ?
H34A C34 H34B 108.6 . . ?
C36 C35 C40 118.97(13) . . ?
C36 C35 C34 122.06(13) . . ?
C40 C35 C34 118.96(13) . . ?
C35 C36 C37 119.59(16) . . ?
C35 C36 H36 120.2 . . ?
C37 C36 H36 120.2 . . ?
C38 C37 C36 120.50(16) . . ?
C38 C37 H37 119.7 . . ?
C36 C37 H37 119.7 . . ?
C39 C38 C37 119.60(15) . . ?
C39 C38 H38 120.2 . . ?
C37 C38 H38 120.2 . . ?
C38 C39 C40 120.32(17) . . ?
C38 C39 H39 119.8 . . ?
C40 C39 H39 119.8 . . ?
C39 C40 C35 121.01(16) . . ?
C39 C40 H40 119.5 . . ?
C35 C40 H40 119.5 . . ?
C68 O51 C66 110.88(10) . . ?
C84 O52 C82 113.35(10) . . ?
C54 N51 C51 112.89(11) . . ?
C54 N51 H51 126.8(11) . . ?
C51 N51 H51 120.2(11) . . ?
C54 N52 C59 119.70(11) . . ?
C63 N53 C59 115.66(11) . . ?
C51 N54 C75 121.53(11) . . ?
C79 N55 C75 115.95(12) . . ?
N54 C51 N51 129.49(12) . . ?
N54 C51 C52 125.15(12) . . ?
N51 C51 C52 105.35(11) . . ?
C55 C52 C53 120.78(12) . . ?
C55 C52 C51 131.10(12) . . ?
C53 C52 C51 108.12(11) . . ?
C58 C53 C52 121.68(12) . . ?
C58 C53 C54 130.47(12) . . ?
C52 C53 C54 107.82(11) . . ?
N52 C54 N51 129.93(12) . . ?
N52 C54 C53 124.30(12) . . ?
N51 C54 C53 105.75(11) . . ?
C56 C55 C52 117.72(12) . . ?
C56 C55 H55 121.1 . . ?
C52 C55 H55 121.1 . . ?
C58 C57 C56 121.02(13) . . ?
C58 C57 H57 119.5 . . ?
C56 C57 H57 119.5 . . ?
C53 C58 C57 117.54(13) . . ?
C53 C58 H58 121.2 . . ?
C57 C58 H58 121.2 . . ?
N53 C59 C60 123.11(12) . . ?
N53 C59 N52 118.91(11) . . ?
C60 C59 N52 117.73(12) . . ?
C61 C60 C59 120.65(13) . . ?
C61 C60 H60 119.7 . . ?
C59 C60 H60 119.7 . . ?
C62 C61 C60 116.19(12) . . ?
C62 C61 C67 121.80(13) . . ?
C60 C61 C67 122.00(14) . . ?
C63 C62 C61 119.21(12) . . ?
C63 C62 C64 110.83(12) . . ?
C61 C62 C64 129.96(13) . . ?
N53 C63 C62 125.16(12) . . ?
N53 C63 C66 124.32(12) . . ?
C62 C63 C66 110.48(11) . . ?
C62 C64 C65 102.57(11) . . ?
C62 C64 H64A 111.3 . . ?
C65 C64 H64A 111.3 . . ?
C62 C64 H64B 111.3 . . ?
C65 C64 H64B 111.3 . . ?
H64A C64 H64B 109.2 . . ?
C66 C65 C64 106.06(11) . . ?
C66 C65 H65A 110.5 . . ?
C64 C65 H65A 110.5 . . ?
C66 C65 H65B 110.5 . . ?
C64 C65 H65B 110.5 . . ?
H65A C65 H65B 108.7 . . ?
O51 C66 C63 111.50(10) . . ?
O51 C66 C65 108.16(10) . . ?
C63 C66 C65 101.90(11) . . ?
O51 C66 H66 111.6 . . ?
C63 C66 H66 111.6 . . ?
C65 C66 H66 111.6 . . ?
C61 C67 H67A 109.5 . . ?
C61 C67 H67B 109.5 . . ?
H67A C67 H67B 109.5 . . ?
C61 C67 H67C 109.5 . . ?
H67A C67 H67C 109.5 . . ?
H67B C67 H67C 109.5 . . ?
O51 C68 C69 111.00(11) . . ?
O51 C68 H68A 109.4 . . ?
C69 C68 H68A 109.4 . . ?
O51 C68 H68B 109.4 . . ?
C69 C68 H68B 109.4 . . ?
H68A C68 H68B 108.0 . . ?
C70 C69 C74 118.99(13) . . ?
C70 C69 C68 119.71(13) . . ?
C74 C69 C68 121.22(13) . . ?
C69 C70 C71 120.54(13) . . ?
C69 C70 H70 119.7 . . ?
C71 C70 H70 119.7 . . ?
C72 C71 C70 119.68(13) . . ?
C72 C71 H71 120.2 . . ?
C70 C71 H71 120.2 . . ?
C71 C72 C73 120.19(14) . . ?
C71 C72 H72 119.9 . . ?
C73 C72 H72 119.9 . . ?
C72 C73 C74 119.92(13) . . ?
C72 C73 H73 120.0 . . ?
C74 C73 H73 120.0 . . ?
C73 C74 C69 120.69(13) . . ?
C73 C74 H74 119.7 . . ?
C69 C74 H74 119.7 . . ?
N55 C75 C76 122.13(13) . . ?
N55 C75 N54 121.53(12) . . ?
C76 C75 N54 116.33(12) . . ?
C77 C76 C75 121.10(14) . . ?
C77 C76 H76 119.4 . . ?
C75 C76 H76 119.4 . . ?
C76 C77 C78 116.54(13) . . ?
C76 C77 C83 121.95(14) . . ?
C78 C77 C83 121.47(14) . . ?
C79 C78 C77 118.57(13) . . ?
C79 C78 C80 110.93(14) . . ?
C77 C78 C80 130.50(14) . . ?
N55 C79 C78 125.69(13) . . ?
N55 C79 C82 123.64(13) . . ?
C78 C79 C82 110.67(12) . . ?
C78 C80 C81 102.99(12) . . ?
C78 C80 H80A 111.2 . . ?
C81 C80 H80A 111.2 . . ?
C78 C80 H80B 111.2 . . ?
C81 C80 H80B 111.2 . . ?
H80A C80 H80B 109.1 . . ?
C82 C81 C80 106.36(12) . . ?
C82 C81 H81A 110.5 . . ?
C80 C81 H81A 110.5 . . ?
C82 C81 H81B 110.5 . . ?
C80 C81 H81B 110.5 . . ?
H81A C81 H81B 108.6 . . ?
O52 C82 C79 112.65(11) . . ?
O52 C82 C81 107.13(11) . . ?
C79 C82 C81 102.60(12) . . ?
O52 C82 H82 111.4 . . ?
C79 C82 H82 111.4 . . ?
C81 C82 H82 111.4 . . ?
C77 C83 H83A 109.5 . . ?
C77 C83 H83B 109.5 . . ?
H83A C83 H83B 109.5 . . ?
C77 C83 H83C 109.5 . . ?
H83A C83 H83C 109.5 . . ?
H83B C83 H83C 109.5 . . ?
O52 C84 C85 108.50(11) . . ?
O52 C84 H84A 110.0 . . ?
C85 C84 H84A 110.0 . . ?
O52 C84 H84B 110.0 . . ?
C85 C84 H84B 110.0 . . ?
H84A C84 H84B 108.4 . . ?
C86 C85 C90 118.30(14) . . ?
C86 C85 C84 120.77(14) . . ?
C90 C85 C84 120.92(14) . . ?
C85 C86 C87 121.09(15) . . ?
C85 C86 H86 119.5 . . ?
C87 C86 H86 119.5 . . ?
C88 C87 C86 119.95(15) . . ?
C88 C87 H87 120.0 . . ?
C86 C87 H87 120.0 . . ?
C87 C88 C89 119.73(15) . . ?
C87 C88 H88 120.1 . . ?
C89 C88 H88 120.1 . . ?
C88 C89 C90 120.03(15) . . ?
C88 C89 H89 120.0 . . ?
C90 C89 H89 120.0 . . ?
C89 C90 C85 120.90(14) . . ?
C89 C90 H90 119.6 . . ?
C85 C90 H90 119.6 . . ?
C55 C56 C57 121.26(12) . . ?
C55 C56 H56 119.4 . . ?
C57 C56 H56 119.4 . . ?
C118 O101 C116 112.64(10) . . ?
C134 O102 C132 113.07(10) . . ?
C101 N101 C104 112.31(11) . . ?
C101 N101 H10 123.8(11) . . ?
C104 N101 H10 123.7(11) . . ?
C104 N102 C109 121.66(11) . . ?
C113 N103 C109 115.62(11) . . ?
C101 N104 C125 122.96(11) . . ?
C129 N105 C125 115.25(11) . . ?
N104 C101 N101 130.35(12) . . ?
N104 C101 C102 123.71(11) . . ?
N101 C101 C102 105.94(10) . . ?
C105 C102 C103 121.46(12) . . ?
C105 C102 C101 130.60(12) . . ?
C103 C102 C101 107.94(11) . . ?
C108 C103 C102 121.02(12) . . ?
C108 C103 C104 130.88(12) . . ?
C102 C103 C104 108.02(11) . . ?
N102 C104 N101 130.35(12) . . ?
N102 C104 C103 123.98(12) . . ?
N101 C104 C103 105.66(11) . . ?
C102 C105 C106 117.59(12) . . ?
C102 C105 H10A 121.2 . . ?
C106 C105 H10A 121.2 . . ?
C107 C106 C105 121.10(12) . . ?
C107 C106 H10B 119.5 . . ?
C105 C106 H10B 119.5 . . ?
C106 C107 C108 121.34(13) . . ?
C106 C107 H10C 119.3 . . ?
C108 C107 H10C 119.3 . . ?
C103 C108 C107 117.48(12) . . ?
C103 C108 H10D 121.3 . . ?
C107 C108 H10D 121.3 . . ?
N103 C109 C110 122.64(12) . . ?
N103 C109 N102 120.39(11) . . ?
C110 C109 N102 116.84(11) . . ?
C111 C110 C109 120.44(12) . . ?
C111 C110 H11 119.8 . . ?
C109 C110 H11 119.8 . . ?
C112 C111 C110 116.69(12) . . ?
C112 C111 C117 121.33(12) . . ?
C110 C111 C117 121.98(12) . . ?
C113 C112 C111 118.63(12) . . ?
C113 C112 C114 110.97(12) . . ?
C111 C112 C114 130.39(12) . . ?
N103 C113 C112 125.94(12) . . ?
N103 C113 C116 123.02(11) . . ?
C112 C113 C116 110.97(11) . . ?
C112 C114 C115 103.03(11) . . ?
C112 C114 H11A 111.2 . . ?
C115 C114 H11A 111.2 . . ?
C112 C114 H11B 111.2 . . ?
C115 C114 H11B 111.2 . . ?
H11A C114 H11B 109.1 . . ?
C116 C115 C114 106.18(11) . . ?
C116 C115 H11C 110.5 . . ?
C114 C115 H11C 110.5 . . ?
C116 C115 H11D 110.5 . . ?
C114 C115 H11D 110.5 . . ?
H11C C115 H11D 108.7 . . ?
O101 C116 C113 105.89(10) . . ?
O101 C116 C115 112.31(11) . . ?
C113 C116 C115 102.52(11) . . ?
O101 C116 H11E 111.9 . . ?
C113 C116 H11E 111.9 . . ?
C115 C116 H11E 111.9 . . ?
C111 C117 H11F 109.5 . . ?
C111 C117 H11G 109.5 . . ?
H11F C117 H11G 109.5 . . ?
C111 C117 H11H 109.5 . . ?
H11F C117 H11H 109.5 . . ?
H11G C117 H11H 109.5 . . ?
O101 C118 C119 109.75(11) . . ?
O101 C118 H11I 109.7 . . ?
C119 C118 H11I 109.7 . . ?
O101 C118 H11J 109.7 . . ?
C119 C118 H11J 109.7 . . ?
H11I C118 H11J 108.2 . . ?
C120 C119 C124 119.11(13) . . ?
C120 C119 C118 121.46(12) . . ?
C124 C119 C118 119.43(12) . . ?
C119 C120 C121 120.30(13) . . ?
C119 C120 H12 119.9 . . ?
C121 C120 H12 119.9 . . ?
C122 C121 C120 120.10(14) . . ?
C122 C121 H12A 119.9 . . ?
C120 C121 H12A 119.9 . . ?
C123 C122 C121 119.97(14) . . ?
C123 C122 H12B 120.0 . . ?
C121 C122 H12B 120.0 . . ?
C122 C123 C124 119.93(14) . . ?
C122 C123 H12C 120.0 . . ?
C124 C123 H12C 120.0 . . ?
C123 C124 C119 120.59(13) . . ?
C123 C124 H12D 119.7 . . ?
C119 C124 H12D 119.7 . . ?
N105 C125 C126 122.54(12) . . ?
N105 C125 N104 121.61(11) . . ?
C126 C125 N104 115.78(12) . . ?
C127 C126 C125 121.34(13) . . ?
C127 C126 H12E 119.3 . . ?
C125 C126 H12E 119.3 . . ?
C126 C127 C128 115.88(12) . . ?
C126 C127 C133 122.15(14) . . ?
C128 C127 C133 121.95(13) . . ?
C129 C128 C127 119.42(13) . . ?
C129 C128 C130 111.12(13) . . ?
C127 C128 C130 129.46(13) . . ?
N105 C129 C128 125.54(13) . . ?
N105 C129 C132 123.53(12) . . ?
C128 C129 C132 110.86(12) . . ?
C128 C130 C131 103.31(12) . . ?
C128 C130 H13A 111.1 . . ?
C131 C130 H13A 111.1 . . ?
C128 C130 H13B 111.1 . . ?
C131 C130 H13B 111.1 . . ?
H13A C130 H13B 109.1 . . ?
C130 C131 C132 106.59(12) . . ?
C130 C131 H13C 110.4 . . ?
C132 C131 H13C 110.4 . . ?
C130 C131 H13D 110.4 . . ?
C132 C131 H13D 110.4 . . ?
H13C C131 H13D 108.6 . . ?
O102 C132 C129 106.07(11) . . ?
O102 C132 C131 112.73(11) . . ?
C129 C132 C131 102.02(11) . . ?
O102 C132 H13 111.8 . . ?
C129 C132 H13 111.8 . . ?
C131 C132 H13 111.8 . . ?
C127 C133 H13E 109.5 . . ?
C127 C133 H13F 109.5 . . ?
H13E C133 H13F 109.5 . . ?
C127 C133 H13G 109.5 . . ?
H13E C133 H13G 109.5 . . ?
H13F C133 H13G 109.5 . . ?
O102 C134 C135 113.88(11) . . ?
O102 C134 H13H 108.8 . . ?
C135 C134 H13H 108.8 . . ?
O102 C134 H13I 108.8 . . ?
C135 C134 H13I 108.8 . . ?
H13H C134 H13I 107.7 . . ?
C136 C135 C140 118.73(14) . . ?
C136 C135 C134 121.12(13) . . ?
C140 C135 C134 120.06(13) . . ?
C137 C136 C135 120.45(15) . . ?
C137 C136 H13J 119.8 . . ?
C135 C136 H13J 119.8 . . ?
C136 C137 C138 120.28(15) . . ?
C136 C137 H13K 119.9 . . ?
C138 C137 H13K 119.9 . . ?
C139 C138 C137 119.60(15) . . ?
C139 C138 H13L 120.2 . . ?
C137 C138 H13L 120.2 . . ?
C138 C139 C140 120.22(15) . . ?
C138 C139 H13M 119.9 . . ?
C140 C139 H13M 119.9 . . ?
C139 C140 C135 120.69(15) . . ?
C139 C140 H14 119.7 . . ?
C135 C140 H14 119.7 . . ?
C168 O151 C166 114.10(11) . . ?
C184 O152 C182 112.50(10) . . ?
C151 N151 C154 112.52(11) . . ?
C151 N151 H15 127.2(11) . . ?
C154 N151 H15 120.2(11) . . ?
C154 N152 C159 122.16(11) . . ?
C163 N153 C159 115.56(11) . . ?
C151 N154 C175 119.91(11) . . ?
C175 N155 C179 114.97(12) . . ?
N154 C151 N151 129.86(12) . . ?
N154 C151 C152 124.23(12) . . ?
N151 C151 C152 105.72(11) . . ?
C155 C152 C153 122.21(12) . . ?
C155 C152 C151 129.77(12) . . ?
C153 C152 C151 108.00(11) . . ?
C158 C153 C152 120.71(12) . . ?
C158 C153 C154 131.14(12) . . ?
C152 C153 C154 108.15(11) . . ?
N152 C154 N151 129.88(13) . . ?
N152 C154 C153 124.68(12) . . ?
N151 C154 C153 105.44(11) . . ?
C152 C155 C156 117.01(13) . . ?
C152 C155 H15A 121.5 . . ?
C156 C155 H15A 121.5 . . ?
C155 C156 C157 120.93(13) . . ?
C155 C156 H15B 119.5 . . ?
C157 C156 H15B 119.5 . . ?
C158 C157 C156 121.76(13) . . ?
C158 C157 H15C 119.1 . . ?
C156 C157 H15C 119.1 . . ?
C157 C158 C153 117.35(13) . . ?
C157 C158 H15D 121.3 . . ?
C153 C158 H15D 121.3 . . ?
N153 C159 C160 122.42(12) . . ?
N153 C159 N152 120.97(12) . . ?
C160 C159 N152 116.61(12) . . ?
C161 C160 C159 121.08(13) . . ?
C161 C160 H16 119.5 . . ?
C159 C160 H16 119.5 . . ?
C160 C161 C162 116.33(12) . . ?
C160 C161 C167 122.33(14) . . ?
C162 C161 C167 121.32(13) . . ?
C163 C162 C161 119.19(13) . . ?
C163 C162 C164 111.11(13) . . ?
C161 C162 C164 129.70(13) . . ?
N153 C163 C162 125.41(13) . . ?
N153 C163 C166 123.56(12) . . ?
C162 C163 C166 111.03(12) . . ?
C162 C164 C165 102.87(12) . . ?
C162 C164 H16A 111.2 . . ?
C165 C164 H16A 111.2 . . ?
C162 C164 H16B 111.2 . . ?
C165 C164 H16B 111.2 . . ?
H16A C164 H16B 109.1 . . ?
C166 C165 C164 106.59(12) . . ?
C166 C165 H16C 110.4 . . ?
C164 C165 H16C 110.4 . . ?
C166 C165 H16D 110.4 . . ?
C164 C165 H16D 110.4 . . ?
H16C C165 H16D 108.6 . . ?
O151 C166 C163 112.75(11) . . ?
O151 C166 C165 106.51(11) . . ?
C163 C166 C165 102.57(12) . . ?
O151 C166 H16E 111.5 . . ?
C163 C166 H16E 111.5 . . ?
C165 C166 H16E 111.5 . . ?
C161 C167 H16F 109.5 . . ?
C161 C167 H16G 109.5 . . ?
H16F C167 H16G 109.5 . . ?
C161 C167 H16H 109.5 . . ?
H16F C167 H16H 109.5 . . ?
H16G C167 H16H 109.5 . . ?
O151 C168 C169 107.66(11) . . ?
O151 C168 H16J 110.2 . . ?
C169 C168 H16J 110.2 . . ?
O151 C168 H16K 110.2 . . ?
C169 C168 H16K 110.2 . . ?
H16J C168 H16K 108.5 . . ?
C174 C169 C170 118.79(15) . . ?
C174 C169 C168 120.48(13) . . ?
C170 C169 C168 120.71(14) . . ?
C171 C170 C169 120.62(16) . . ?
C171 C170 H17 119.7 . . ?
C169 C170 H17 119.7 . . ?
C172 C171 C170 120.02(15) . . ?
C172 C171 H17A 120.0 . . ?
C170 C171 H17A 120.0 . . ?
C171 C172 C173 119.64(16) . . ?
C171 C172 H17B 120.2 . . ?
C173 C172 H17B 120.2 . . ?
C172 C173 C174 120.31(18) . . ?
C172 C173 H17C 119.8 . . ?
C174 C173 H17C 119.8 . . ?
C169 C174 C173 120.58(16) . . ?
C169 C174 H17D 119.7 . . ?
C173 C174 H17D 119.7 . . ?
N155 C175 C176 123.49(12) . . ?
N155 C175 N154 118.01(12) . . ?
C176 C175 N154 118.37(12) . . ?
C177 C176 C175 120.81(13) . . ?
C177 C176 H17E 119.6 . . ?
C175 C176 H17E 119.6 . . ?
C176 C177 C178 115.92(12) . . ?
C176 C177 C183 121.85(13) . . ?
C178 C177 C183 122.23(13) . . ?
[truncated: 130,242 more chars]
